# Supplementary material for: FTD-tau S320F mutation stabilizes local structure and allosterically promotes amyloid motif-dependent aggregation
Source: Research Square preprint supplement (doi:10.21203/rs.3.rs-1950269/v1), 2022-08-22
Supplement: Supplementary file 1 [file 10c8828f9f58bd094d810af0.xlsx]

## Sheet: Fig1b
Time Elapsed (hours)	WT tauRD 25uM			P301S tauRD 25uM			S320F tauRD 25uM			WT tauRD 62.5uM			P301S tauRD 62.5uM			S320F tauRD 62.5uM
0	5	3	3	7	8	6	14	13	13	9	6	6	7	4	2	51	47	39
0.166667	4	3	4	5	6	5	15	14	12	8	5	6	8	3	5	54	54	42
0.333333	5	2	1	4	2	7	16	14	16	7	6	3	5	4	5	57	57	48
0.5	4	2	3	6	2	4	20	17	18	8	4	4	7	5	3	66	65	49
0.666667	4	2	2	3	3	4	28	21	20	5	3	5	6	6	1	70	67	53
0.833333	3	3	2	5	5	3	28	25	24	7	3	4	6	5	3	75	76	57
1	2	3	0	5	4	3	32	28	28	5	6	3	6	3	4	82	79	59
1.16667	4	3	2	3	1	5	34	29	27	5	5	5	0	5	5	81	78	62
1.33333	3	3	2	5	4	3	40	33	28	6	5	3	0	5	3	84	81	63
1.5	3	2	2	5	3	4	39	34	33	7	4	3	3	5	4	88	85	67
1.66667	3	3	1	6	5	5	42	37	34	5	5	3	2	6	5	91	84	67
1.83333	5	2	3	5	2	4	42	38	37	8	3	4	1	4	5	98	86	72
2	3	4	4	3	2	4	45	38	39	6	7	4	1	4	5	93	91	72
2.16667	3	4	2	5	2	4	47	41	41	6	5	4	-1	3	4	100	90	73
2.33333	4	2	3	6	3	3	47	45	39	8	4	5	0	4	5	101	98	75
2.5	1	2	3	3	4	6	51	43	43	4	2	3	-1	4	5	105	97	72
2.66667	3	2	3	4	4	5	50	45	42	5	5	4	1	4	4	111	97	79
2.83333	2	2	1	5	3	4	51	47	45	4	3	4	2	6	5	110	105	79
3	4	2	2	5	4	4	50	46	46	5	4	3	1	5	3	112	102	76
3.16667	4	4	3	3	3	5	52	49	47	7	7	3	1	4	4	113	104	79
3.33333	4	2	1	6	5	3	57	48	49	6	3	4	2	5	6	113	105	83
3.5	4	0	1	6	4	5	57	48	47	6	5	4	0	4	4	116	105	81
3.66667	5	4	2	4	3	3	54	51	50	6	4	3	1	5	3	115	109	82
3.83333	4	2	3	4	2	5	55	48	46	5	4	4	2	5	5	121	107	83
4	5	3	2	4	3	3	55	52	47	4	5	2	1	5	4	121	117	87
4.16667	5	3	2	5	3	5	57	55	46	6	4	4	1	5	4	121	110	86
4.33333	3	2	3	4	3	4	56	54	48	7	5	4	5	6	5	121	110	88
4.5	3	1	2	6	5	5	62	56	49	3	5	4	6	6	3	123	108	85
4.66667	3	3	1	5	4	4	58	53	49	5	5	2	3	3	4	125	111	88
4.83333	3	3	1	4	5	6	58	55	50	6	6	3	5	5	4	123	111	89
5	3	2	2	5	4	3	60	54	52	3	4	3	2	5	4	126	111	88
5.16667	3	3	3	4	4	3	58	54	49	5	4	4	4	3	4	120	116	86
5.33333	2	2	2	5	5	5	62	57	57	5	4	5	3	5	7	125	112	85
5.5	3	1	3	5	3	2	62	52	55	5	3	4	5	5	4	128	113	88
5.66667	3	3	2	4	4	4	63	55	50	5	4	6	3	5	3	126	110	89
5.83333	3	2	1	5	2	6	58	55	55	5	4	4	3	3	4	124	114	87
6	3	2	-2	6	3	4	60	56	54	5	3	2	2	6	2	124	112	88
6.16667	2	1	2	4	5	4	63	57	53	4	1	4	4	4	3	122	111	86
6.33333	3	4	1	7	1	6	59	55	54	5	5	2	1	5	4	125	108	88
6.5	2	1	0	4	2	4	62	54	54	6	5	4	3	4	4	129	114	90
6.66667	2	2	2	6	2	4	61	59	52	5	3	3	3	4	3	127	110	84
6.83333	2	0	1	4	3	5	63	54	53	6	2	3	5	3	4	124	116	90
7	3	3	0	3	5	3	61	55	52	5	5	3	3	5	1	120	110	85
7.16667	4	1	2	4	4	4	62	54	53	5	3	3	1	6	4	123	112	83
7.33333	3	2	-1	6	3	6	64	55	54	5	4	2	3	4	4	125	116	85
7.5	1	3	2	5	4	4	61	52	52	3	5	2	4	4	4	124	122	88
7.66667	2	2	2	5	4	3	61	57	55	5	4	5	3	4	4	124	121	86
7.83333	3	-1	3	6	4	5	65	53	55	6	3	2	6	7	2	124	112	88
8	3	2	2	5	5	5	61	56	53	5	4	2	5	6	6	119	110	87
8.16667	4	4	1	4	3	4	62	55	53	7	5	2	4	4	4	119	110	91
8.33333	4	3	4	5	3	4	61	57	52	7	4	3	6	5	4	124	110	87
8.5	4	2	1	6	3	4	58	56	54	5	5	2	5	5	4	123	109	89
8.66667	5	3	2	4	3	4	63	57	54	6	5	4	5	4	4	126	108	87
8.83333	3	1	1	4	4	3	62	53	49	6	4	6	7	3	3	124	106	92
9	4	1	2	5	3	5	62	60	51	6	2	4	4	5	5	122	114	86
9.16667	3	2	3	5	6	3	65	57	57	5	5	5	5	6	4	118	107	84
9.33333	3	3	3	5	3	5	61	55	53	4	5	4	5	4	5	117	109	88
9.5	3	3	3	6	3	5	65	52	54	6	5	4	6	6	3	115	106	90
9.66667	4	1	1	4	5	3	63	53	54	8	6	5	4	4	4	120	108	84
9.83333	4	2	0	5	4	4	66	55	54	8	6	2	4	3	5	115	102	84
10	2	1	1	3	6	4	64	53	53	6	3	2	4	5	5	116	104	86
10.1667	3	2	4	4	5	5	67	53	54	5	5	6	6	5	4	113	105	90
10.3333	3	3	3	4	4	5	67	55	51	5	5	5	3	2	3	112	104	86
10.5	4	4	3	5	4	2	69	55	53	7	4	5	4	5	3	108	109	89
10.6667	1	2	2	4	3	7	68	55	50	6	5	3	5	5	3	110	105	83
10.8333	2	2	0	3	5	3	67	51	49	6	4	2	6	6	5	109	103	87
11	2	3	0	4	4	3	70	54	49	6	5	5	5	5	5	112	97	86
11.1667	3	1	3	4	3	4	66	51	51	7	3	6	5	5	4	107	98	86
11.3333	3	4	2	4	3	6	65	51	51	6	6	4	5	5	3	112	105	86
11.5	2	3	2	4	3	3	66	52	48	6	6	2	5	4	6	103	99	84
11.6667	2	2	2	5	2	4	63	53	54	4	5	5	4	5	4	112	104	83
11.8333	4	2	3	4	3	5	64	52	50	7	5	3	5	4	5	111	99	81
12	2	2	2	5	3	5	66	53	51	6	5	4	3	6	3	105	106	82
12.1667	2	2	3	4	5	4	66	52	52	6	6	4	7	5	4	100	100	82
12.3333	3	3	2	7	5	4	66	52	49	5	4	3	5	6	3	103	97	80
12.5	7	3	1	5	3	6	64	54	54	7	4	3	6	4	4	102	105	81
12.6667	3	5	1	6	5	5	65	51	50	6	7	4	7	4	1	104	98	83
12.8333	3	1	3	6	2	7	65	49	49	7	4	5	7	4	5	100	93	83
13	4	2	1	4	2	3	62	49	51	7	6	1	5	4	2	105	98	80
13.1667	6	1	2	4	5	4	62	48	47	8	5	4	4	6	5	100	99	82
13.3333	4	3	0	4	6	4	62	52	46	7	5	1	5	6	3	101	98	83
13.5	3	2	2	5	4	3	63	50	45	7	5	4	2	3	4	100	99	79
13.6667	3	2	1	4	3	5	64	50	48	7	5	3	5	4	4	100	94	84
13.8333	0	2	1	4	2	5	62	50	46	5	5	4	4	7	5	102	91	81
14	1	2	1	5	3	5	60	50	51	5	5	3	5	5	5	102	96	79
14.1667	0	2	2	5	2	3	64	50	51	4	6	4	4	4	5	97	91	84
14.3333	4	3	3	6	3	5	56	49	48	7	5	4	5	5	4	97	93	81
14.5	3	3	3	4	4	4	61	52	47	6	5	4	5	4	5	95	95	81
14.6667	3	2	1	5	2	6	62	47	47	6	5	3	6	4	5	97	91	82
14.8333	3	2	3	5	3	4	60	46	46	6	6	4	5	4	3	104	91	77
15	4	2	3	4	2	4	61	47	46	6	4	4	4	4	3	96	92	78
15.1667	3	1	2	5	5	4	56	48	46	6	3	5	4	4	4	96	94	81
15.3333	2	2	1	5	4	3	58	46	46	5	6	3	6	5	5	98	90	80
15.5	2	1	2	4	3	5	57	49	45	6	5	4	6	6	5	96	94	78
15.6667	2	3	3	7	5	4	60	44	48	7	7	5	5	2	5	92	99	78
15.8333	3	2	2	5	6	4	58	47	47	6	5	4	5	3	4	94	86	80
16	3	2	2	5	5	5	62	48	46	7	4	5	5	6	4	94	92	75
16.1667	3	1	2	4	5	5	59	49	45	6	4	5	4	4	5	95	91	73
16.3333	1	3	3	4	2	4	59	46	47	5	5	4	5	4	4	91	95	77
16.5	2	3	4	5	3	6	58	51	46	7	6	3	6	3	3	91	90	74
16.6667	1	3	3	4	3	6	56	43	50	6	4	4	4	5	3	97	89	81
16.8333	3	1	2	4	3	5	57	49	43	7	5	3	4	7	5	94	100	77
17	2	3	2	7	2	2	55	48	45	6	5	4	6	4	3	94	89	80
17.1667	1	4	2	5	5	3	59	44	48	5	6	4	6	4	3	92	92	81
17.3333	3	2	1	5	3	5	57	46	43	7	4	3	6	6	4	93	87	80
17.5	3	3	2	6	2	4	58	45	42	7	4	5	6	5	6	92	88	75
17.6667	4	3	3	4	4	6	56	42	43	7	6	3	3	4	4	97	93	74
17.8333	3	2	3	5	4	3	60	45	42	6	5	5	5	4	5	95	89	74
18	2	1	2	8	5	3	55	45	42	5	4	4	5	6	4	90	94	79
18.1667	2	1	2	6	4	5	52	40	43	6	7	4	4	5	3	93	86	78
18.3333	3	3	2	7	4	5	53	46	44	8	5	5	5	4	5	92	93	74
18.5	4	3	1	4	5	4	55	44	40	6	6	3	4	5	4	88	88	80
18.6667	3	1	3	5	4	4	55	45	44	6	4	4	2	6	3	90	84	79
18.8333	3	1	1	5	5	6	54	45	39	7	6	4	5	6	3	89	85	79
19	1	3	1	6	4	6	54	40	40	5	4	4	5	3	4	90	89	74
19.1667	3	2	2	5	4	4	54	42	43	6	5	4	4	5	5	93	91	74
19.3333	4	1	3	7	5	3	53	44	41	6	3	4	4	5	5	93	87	76
19.5	2	2	1	6	4	5	55	42	42	6	4	5	3	3	4	92	81	77
19.6667	3	2	2	5	5	4	55	42	40	7	4	3	6	7	3	90	87	78
19.8333	1	1	2	6	4	5	53	47	39	5	7	5	5	6	3	93	88	76
20	4	3	2	7	4	6	55	45	41	8	7	4	8	4	5	89	83	76
20.1667	2	3	2	4	4	5	54	42	40	7	6	5	5	5	6	90	87	78
20.3333	4	2	2	8	4	4	56	41	42	8	4	5	6	4	2	92	87	80
20.5	3	1	4	5	4	6	53	42	43	7	5	4	4	6	4	93	85	78
20.6667	4	2	1	5	6	5	50	42	40	6	6	2	4	3	4	92	88	73
20.8333	2	3	3	5	3	3	55	39	41	6	7	5	6	6	6	85	86	75
21	2	1	2	4	5	5	50	43	40	6	4	4	6	6	6	91	86	76
21.1667	2	2	2	5	4	6	54	42	39	6	4	4	5	4	3	91	83	75
21.3333	4	2	3	5	5	5	50	44	42	6	5	5	6	4	3	87	86	74
21.5	3	3	2	6	4	6	53	41	41	7	5	3	5	5	4	89	86	74
21.6667	4	2	0	5	5	6	52	43	42	8	6	2	5	4	4	88	82	72
21.8333	3	2	2	3	4	4	53	41	41	7	5	4	4	6	5	87	82	73
22	3	1	2	5	3	3	52	41	41	7	4	4	3	5	4	88	84	74
22.1667	2	2	1	4	4	5	50	40	40	6	6	4	4	4	5	89	86	73
22.3333	4	2	1	6	2	6	53	42	41	5	7	4	6	4	3	83	86	74
22.5	2	1	2	5	2	3	54	43	37	6	4	5	6	5	4	87	83	73
22.6667	4	1	2	5	6	6	48	39	38	8	5	5	6	6	3	83	83	74
22.8333	3	2	3	5	4	5	51	38	39	6	6	5	6	5	4	86	82	77
23	2	2	1	5	3	2	52	41	38	5	5	3	3	3	5	88	79	75
23.1667	2	3	3	5	3	4	50	40	38	7	4	6	5	5	5	86	85	76
23.3333	0	2	3	6	5	4	50	39	37	5	6	4	5	6	5	88	84	74
23.5	3	2	3	6	4	5	51	41	38	7	4	5	6	6	4	87	85	74
23.6667	3	1	2	4	4	6	56	39	38	6	7	4	6	5	5	90	83	75
23.8333	2	3	3	7	2	3	52	40	37	7	6	5	5	4	5	87	86	75
24	3	2	3	4	3	5	50	40	38	7	6	4	5	5	3	84	82	76
24.1667	3	2	2	4	4	4	48	43	38	7	5	5	5	4	4	85	82	74
24.3333	3	1	1	5	3	6	49	40	40	7	3	2	7	6	4	86	83	70
24.5	3	1	1	6	4	3	51	41	37	5	2	4	5	5	5	87	84	76
24.6667	5	2	2	5	2	4	50	41	35	8	4	3	4	8	5	82	82	76
24.8333	4	2	1	5	4	5	50	40	34	7	3	5	5	6	4	84	83	75
25	3	5	3	4	4	5	52	41	37	7	6	5	5	6	5	82	84	76
25.1667	2	3	0	5	4	5	50	38	39	7	6	2	4	4	3	85	80	74
25.3333	4	2	3	4	3	6	48	42	37	6	7	6	5	5	4	83	80	75
25.5	3	3	1	4	5	6	51	39	38	9	6	4	7	4	5	87	83	73
25.6667	2	3	2	6	5	5	52	38	36	7	6	4	7	4	3	85	81	76
25.8333	5	3	3	7	3	7	49	41	35	9	5	4	4	6	3	86	83	74
26	4	2	0	7	4	4	49	38	40	7	3	2	2	4	4	85	79	72
26.1667	3	3	1	4	4	3	48	36	39	5	6	4	3	4	5	86	81	71
26.3333	2	2	1	5	5	4	45	35	35	7	3	4	5	6	4	84	82	73
26.5	2	2	3	6	4	4	48	38	37	4	6	4	5	5	4	83	83	69
26.6667	4	2	3	7	5	2	46	38	38	7	6	4	6	4	4	80	80	73
26.8333	3	2	2	7	2	6	47	40	38	7	4	3	3	4	4	87	86	73
27	3	2	2	4	4	4	47	41	35	8	5	3	4	6	5	84	84	69
27.1667	2	2	1	5	3	4	51	38	37	6	5	3	3	5	5	84	83	73
27.3333	2	2	3	5	2	4	44	37	35	4	5	5	5	4	4	83	80	76
27.5	2	2	2	4	5	5	49	40	35	8	5	4	5	4	3	82	83	71
27.6667	4	3	1	4	4	5	51	38	39	7	5	4	5	4	6	84	89	74
27.8333	3	0	2	5	3	3	48	39	37	6	5	2	6	5	4	83	86	71
28	3	1	4	6	2	6	49	40	37	7	5	5	4	5	4	82	81	76
28.1667	4	1	2	4	3	4	47	36	38	8	4	6	4	4	4	88	80	70
28.3333	2	1	1	5	2	5	49	37	36	6	6	4	5	4	4	84	79	74
28.5	2	3	2	6	4	4	46	39	35	6	5	4	5	5	4	81	83	75
28.6667	3	2	3	5	5	3	46	38	35	6	5	5	7	5	4	85	82	74
28.8333	3	3	3	3	3	5	48	37	35	7	4	4	6	5	3	83	79	73
29	5	2	2	6	4	3	48	39	35	7	5	4	5	5	4	82	83	74
29.1667	2	2	3	4	4	4	47	38	33	7	6	3	4	4	6	82	80	70
29.3333	3	2	1	6	4	3	48	38	35	6	5	3	5	4	5	81	83	74
29.5	2	2	3	3	4	6	48	36	35	6	5	4	6	5	5	83	87	71
29.6667	2	1	3	6	6	3	51	38	32	7	5	4	7	3	4	84	80	71
29.8333	1	2	4	6	5	6	48	36	33	7	5	5	5	4	3	79	83	70
30	4	2	2	5	4	5	46	38	36	8	4	4	4	4	3	81	79	71
30.1667	2	2	1	4	3	4	50	37	36	7	5	5	4	5	4	82	85	78
30.3333	2	4	2	6	3	5	51	38	35	6	5	4	5	6	4	82	91	68
30.5	3	3	2	4	4	4	45	37	34	9	7	4	5	4	5	83	78	71
30.6667	4	2	2	5	3	4	46	39	35	7	4	3	6	5	6	86	77	71
30.8333	3	2	3	6	4	6	41	35	35	5	3	6	6	4	3	85	79	72
31	3	1	1	5	4	5	47	35	34	7	4	6	6	4	4	84	84	71
31.1667	3	2	2	6	5	4	48	39	32	8	5	3	5	6	4	81	75	71
31.3333	5	2	2	5	4	4	50	36	34	8	5	2	4	4	4	85	80	73
31.5	3	2	2	6	4	4	45	38	32	6	5	5	6	5	4	82	78	71
31.6667	2	2	3	6	4	6	48	34	34	7	5	4	5	3	4	82	78	73
31.8333	4	0	3	5	4	6	47	35	35	8	4	3	6	6	2	82	81	71
32	2	2	2	4	5	5	50	37	36	7	6	4	6	6	3	82	81	70
32.1667	3	2	1	4	5	5	45	33	31	8	4	2	5	5	3	84	81	72
32.3333	2	4	1	4	3	5	44	35	32	8	6	4	4	5	4	83	84	73
32.5	3	2	1	3	5	4	45	35	35	7	5	2	5	6	5	83	82	73
32.6667	2	3	2	4	4	3	48	35	34	6	5	4	5	4	4	83	81	71
32.8333	3	3	2	6	4	3	49	37	35	7	6	5	4	7	4	84	82	71
33	3	1	1	3	5	5	48	33	34	7	5	3	5	5	5	83	79	70
33.1667	4	5	3	4	3	2	44	37	34	6	6	5	5	5	2	83	80	70
33.3333	2	3	3	3	6	5	46	36	33	9	5	4	5	5	5	85	77	69
33.5	2	2	2	6	5	5	48	36	37	8	6	4	5	5	2	83	77	73
33.6667	3	1	2	4	4	6	46	34	34	6	6	5	5	3	5	84	88	69
33.8333	4	2	1	4	4	4	47	37	33	8	6	2	4	4	4	77	80	72
34	1	2	2	6	3	4	45	34	31	8	4	4	5	5	4	84	75	69
34.1667	2	2	0	3	4	5	46	37	31	7	5	5	5	6	4	82	81	71
34.3333	2	2	2	5	4	5	43	34	33	7	7	5	4	3	4	83	77	71
34.5	4	3	2	2	2	5	45	34	34	8	5	4	5	4	4	83	79	67
34.6667	2	3	2	5	2	3	46	36	35	7	6	4	6	5	4	80	81	72
34.8333	1	2	0	6	3	3	46	33	34	8	6	3	6	4	4	81	80	71
35	4	2	1	5	4	4	42	34	33	10	4	4	4	5	3	82	82	69
35.1667	4	2	4	6	4	5	46	36	31	9	5	6	5	6	4	83	76	72
35.3333	3	3	2	7	3	4	45	35	33	7	6	4	5	5	4	80	82	70
35.5	3	1	2	6	3	6	46	35	32	6	7	3	6	5	6	78	80	73
35.6667	3	4	2	4	5	5	44	35	32	10	5	4	5	5	4	80	79	72
35.8333	2	3	3	4	4	5	48	35	35	8	6	5	5	5	4	81	77	72
36	2	1	2	6	4	5	46	36	34	10	5	3	4	6	5	78	75	69
36.1667	3	3	2	5	3	7	45	38	34	7	4	4	6	6	4	82	78	67
36.3333	4	2	2	6	5	4	46	36	33	8	5	4	5	5	5	79	79	69
36.5	3	4	1	5	4	4	46	35	30	8	5	3	4	5	2	78	79	68
36.6667	2	1	3	4	6	4	45	37	33	8	5	6	5	6	3	83	76	67
36.8333	3	2	1	3	4	3	46	38	32	7	4	3	5	5	5	81	77	69
37	3	3	1	5	4	3	47	34	33	8	4	3	4	6	6	78	79	72
37.1667	2	2	2	6	5	7	47	35	35	9	6	5	5	4	5	80	79	67
37.3333	3	3	2	5	4	4	46	35	32	8	6	3	5	5	4	82	80	71
37.5	4	2	2	5	6	5	46	38	32	8	5	4	5	7	5	78	82	68
37.6667	3	2	2	5	5	4	45	36	34	8	5	3	4	3	2	82	78	69
37.8333	2	2	4	4	6	5	47	32	31	8	5	4	4	6	5	83	80	71
38	2	1	0	4	4	4	44	34	32	7	5	3	6	6	3	83	77	67
38.1667	3	3	3	4	2	5	45	36	37	6	5	4	6	2	4	80	77	71
38.3333	2	2	0	5	2	4	44	33	33	9	5	3	6	4	6	82	80	68
38.5	4	0	1	5	3	4	46	33	31	7	3	4	4	5	3	83	80	73
38.6667	3	2	4	4	4	3	46	33	31	8	5	6	4	4	4	82	77	72
38.8333	2	2	1	4	4	3	45	35	34	6	6	2	6	4	3	82	78	65
39	2	3	3	6	3	3	48	34	31	7	5	3	5	6	5	80	77	72
39.1667	2	2	1	6	4	3	46	37	33	7	3	3	5	6	4	82	81	66
39.3333	4	1	2	5	4	4	46	38	32	9	6	5	6	4	3	86	82	70
39.5	2	3	2	4	4	5	48	34	33	9	7	3	4	5	5	84	79	70
39.6667	5	1	0	4	2	4	45	36	34	10	5	3	6	5	5	81	74	75
39.8333	2	2	3	6	6	4	44	33	31	6	6	5	7	5	4	82	79	69
40	4	2	2	7	5	5	47	34	33	9	6	3	5	4	5	83	80	74
40.1667	4	2	2	5	5	5	45	34	36	9	6	4	5	4	5	83	78	72
40.3333	4	2	2	3	3	5	45	37	33	9	4	5	6	4	7	81	76	70
40.5	2	1	2	6	5	2	46	33	37	8	3	3	4	4	6	81	84	69
40.6667	3	2	4	5	3	5	46	34	33	8	6	5	7	5	3	80	78	70
40.8333	3	2	4	5	4	2	46	36	33	8	4	4	5	2	3	81	78	71
41	4	1	0	6	6	5	45	39	33	10	5	3	5	5	4	79	80	67
41.1667	3	2	2	5	3	5	43	34	31	9	3	3	4	5	4	85	80	71
41.3333	3	3	3	4	5	3	47	34	34	8	5	4	5	5	4	82	80	71
41.5	3	1	0	5	4	4	43	37	32	6	7	3	3	4	2	82	75	66
41.6667	4	1	2	5	3	2	45	33	31	7	6	5	5	5	2	81	74	67
41.8333	1	2	1	3	3	5	48	34	36	6	6	2	5	3	5	81	77	71
42	3	2	1	6	4	4	44	38	31	7	6	3	5	5	2	81	79	71
42.1667	2	1	2	6	3	6	43	32	29	9	5	5	5	4	4	81	78	69
42.3333	3	3	1	6	4	3	47	34	32	9	6	3	6	5	4	80	81	70
42.5	2	3	2	6	4	4	45	33	31	8	5	4	4	5	4	82	74	70
42.6667	3	3	3	6	3	6	47	33	31	8	5	5	6	5	4	81	77	72
42.8333	2	2	2	5	3	3	42	35	32	5	5	6	3	6	3	78	78	66
43	2	2	2	7	3	3	46	32	28	7	6	3	4	3	5	83	78	66
43.1667	2	4	1	6	3	4	46	33	32	7	4	4	7	3	4	80	78	69
43.3333	3	0	1	4	5	5	44	34	33	9	5	3	5	6	3	81	79	69
43.5	4	2	3	5	4	7	42	36	33	8	5	4	4	7	5	85	82	70
43.6667	3	3	4	5	4	4	44	33	33	7	6	3	6	5	6	81	77	66
43.8333	2	3	2	5	5	6	46	34	34	8	7	4	6	3	4	80	79	70
44	3	2	4	5	4	4	44	33	32	9	4	5	6	5	6	84	79	75
44.1667	4	4	2	4	2	5	46	37	30	6	6	4	6	5	2	79	76	70
44.3333	4	4	2	4	3	5	41	34	32	7	7	5	6	5	4	82	80	68
44.5	3	3	-1	5	4	6	46	36	32	9	5	1	4	2	3	81	82	72
44.6667	2	4	3	3	4	5	43	36	33	7	6	4	5	2	4	82	78	74
44.8333	4	2	3	5	3	6	45	36	34	8	4	5	7	5	4	81	81	69
45	3	1	1	4	3	5	48	32	33	6	2	4	5	5	4	81	75	70
45.1667	3	3	2	5	4	6	47	33	28	7	6	4	4	5	3	78	77	67
45.3333	3	3	1	5	4	3	44	34	32	8	4	5	7	5	4	78	75	68
45.5	2	2	3	5	4	4	47	34	31	6	7	5	7	5	3	78	76	67
45.6667	5	3	2	5	3	5	45	36	31	9	6	4	4	4	4	84	79	69
45.8333	3	2	1	5	4	6	41	35	32	8	5	3	5	3	5	79	81	69
46	4	1	1	4	4	4	44	32	32	7	4	5	4	4	3	81	77	73
46.1667	3	0	2	4	4	6	43	36	34	10	4	3	6	4	4	79	76	72
46.3333	2	2	1	6	4	5	45	37	30	9	4	3	5	6	4	81	79	69
46.5	5	2	3	5	4	4	45	33	33	11	6	4	5	6	6	81	78	68
46.6667	3	4	3	4	4	6	48	33	31	8	5	4	5	4	4	78	77	67
46.8333	2	1	3	6	3	4	44	33	31	7	6	5	3	4	4	79	77	69
47	4	2	4	4	4	7	44	35	32	9	5	5	4	5	4	81	76	69
47.1667	3	1	2	6	4	5	46	31	31	9	3	3	5	4	4	81	74	70
47.3333	2	2	1	3	3	3	43	32	31	9	5	4	5	3	3	80	76	68
47.5	4	2	1	4	4	5	46	34	31	8	6	3	6	3	4	81	77	67
47.6667	1	2	2	5	5	5	44	34	31	9	5	4	4	2	4	81	80	65
47.8333	3	2	3	5	4	4	39	32	30	9	5	5	6	5	6	79	76	73
48	3	2	1	5	4	4	43	32	31	8	5	4	6	4	4	78	78	69
48.1667	3	2	4	4	4	5	44	33	31	8	6	5	5	5	5	81	82	69
48.3333	3	3	3	5	4	4	43	34	30	11	6	3	3	3	6	81	78	68
48.5	4	4	1	5	5	4	45	34	30	9	5	2	5	5	3	79	76	68
48.6667	1	1	1	6	3	6	43	33	33	6	5	4	6	4	5	84	78	70
48.8333	2	2	1	5	4	6	44	36	32	9	6	4	6	4	5	80	77	67
49	4	2	2	1	4	2	42	34	32	10	5	4	4	5	4	83	77	65
49.1667	2	1	2	7	6	5	43	34	29	7	6	3	5	4	6	79	81	68
49.3333	3	2	1	3	4	5	40	34	30	8	5	4	4	3	5	83	74	67
49.5	4	3	4	3	3	5	43	33	29	7	7	4	7	5	4	76	76	67
49.6667	3	1	1	8	5	5	42	34	31	7	5	3	6	4	4	80	76	70
49.8333	3	2	3	5	5	3	45	33	30	10	6	3	5	3	4	83	74	68
50	2	2	3	4	5	3	43	32	27	9	5	5	8	5	5	78	77	69
50.1667	2	3	3	6	4	5	48	33	30	8	6	4	5	5	6	79	78	66
50.3333	3	2	2	4	3	4	41	33	28	9	5	4	5	4	4	80	75	65
50.5	3	4	3	5	5	5	41	33	30	8	5	4	3	4	5	80	74	66
50.6667	4	2	3	4	5	4	43	33	31	7	5	5	4	5	4	79	77	66
50.8333	3	2	1	5	4	5	46	36	33	6	7	4	5	4	4	80	77	69
51	2	3	3	3	5	7	47	33	35	8	6	3	4	4	4	80	79	71
51.1667	1	2	2	5	3	5	44	35	33	8	5	5	4	4	4	79	80	66
51.3333	4	2	1	6	4	4	43	35	32	8	4	4	4	3	2	81	78	70
51.5	3	0	2	3	4	3	44	34	31	10	4	3	6	4	5	80	78	70
51.6667	3	1	1	3	5	7	43	34	31	8	6	2	4	5	5	79	74	72
51.8333	3	1	3	3	5	5	45	31	28	8	5	4	4	5	3	78	77	66
52	4	4	1	4	6	4	46	31	30	8	5	4	6	6	5	78	77	68
52.1667	2	3	1	5	6	2	41	33	32	9	7	4	4	4	4	79	77	68
52.3333	5	3	3	5	5	4	45	33	31	7	6	6	3	3	4	79	77	67
52.5	2	3	3	5	4	6	44	37	34	7	5	3	5	5	5	79	79	69
52.6667	0	1	2	6	4	4	43	34	27	8	6	4	4	3	3	81	75	69
52.8333	3	3	3	4	4	4	46	35	30	7	6	4	6	5	4	76	76	68
53	2	3	0	5	3	3	43	30	33	10	5	4	6	5	4	80	76	66
53.1667	4	2	5	5	2	4	44	34	29	9	8	6	5	6	5	80	78	66
53.3333	3	1	2	5	4	5	43	32	30	8	5	2	5	3	4	82	80	69
53.5	1	2	4	5	4	3	42	33	30	7	6	7	6	4	2	81	75	70
53.6667	1	2	1	5	3	5	46	32	33	9	5	4	5	5	3	83	76	68
53.8333	4	3	1	7	3	5	44	34	29	7	6	4	5	5	4	79	75	70
54	3	2	2	4	3	4	45	33	30	9	5	3	4	4	4	78	78	69
54.1667	4	3	3	6	5	5	46	34	30	9	6	4	5	5	7	79	80	70
54.3333	3	1	2	5	4	4	45	36	33	8	7	5	4	4	4	81	77	66
54.5	4	2	4	5	4	5	43	31	31	9	7	4	5	5	4	80	77	67
54.6667	3	2	1	4	3	5	43	35	31	8	7	4	3	6	5	74	77	68
54.8333	2	2	1	4	5	6	45	30	32	10	8	3	4	5	5	80	76	67
55	2	3	2	4	4	5	45	32	33	9	8	4	4	6	5	78	76	70
55.1667	4	2	2	6	4	5	41	34	30	7	7	3	5	5	3	81	73	68
55.3333	1	3	1	6	4	5	46	33	30	7	7	3	4	5	6	80	78	67
55.5	3	2	2	3	3	4	44	32	31	9	6	3	3	2	4	76	76	69
55.6667	2	3	3	6	4	3	45	31	31	7	5	5	4	5	6	80	75	69
55.8333	1	1	1	5	3	5	46	31	30	7	5	4	6	3	2	83	74	70
56	3	1	3	5	4	5	44	34	28	11	5	3	5	5	7	78	76	71
56.1667	4	3	1	6	5	4	46	32	31	7	6	2	5	4	4	80	76	66
56.3333	3	1	2	5	6	2	45	35	31	9	5	4	6	5	6	75	77	69
56.5	4	2	1	5	4	5	45	32	30	10	6	3	4	5	5	83	74	64
56.6667	2	1	2	3	5	5	41	32	29	9	6	4	6	5	4	78	75	68
56.8333	2	4	2	5	4	5	46	35	29	7	7	4	4	3	6	81	76	69
57	5	3	2	5	5	5	42	33	29	8	5	5	5	5	4	80	76	72
57.1667	3	0	2	6	3	4	40	35	29	7	5	5	5	3	4	81	76	70
57.3333	4	2	1	6	1	4	44	35	30	9	6	3	3	5	3	84	74	68
57.5	3	0	3	6	3	4	42	32	32	10	4	5	4	5	5	77	75	67
57.6667	1	1	1	5	3	2	44	32	28	7	8	4	5	3	5	77	79	71
57.8333	3	2	2	4	4	5	44	33	30	8	6	5	6	4	5	81	77	66
58	3	0	3	6	5	3	43	35	30	8	4	4	5	3	5	81	77	68
58.1667	5	2	4	6	4	5	48	33	32	8	6	5	6	6	4	81	79	71
58.3333	2	2	1	6	3	4	44	31	29	9	6	4	5	5	4	81	74	69
58.5	2	2	2	5	4	4	44	34	29	8	6	4	5	4	5	78	73	65
58.6667	3	2	2	4	4	5	42	33	31	10	6	3	6	4	5	79	76	70
58.8333	4	2	3	5	4	4	48	31	31	9	5	4	4	4	6	79	76	69
59	2	2	3	3	4	4	44	32	31	8	6	4	4	4	3	76	76	68
59.1667	3	2	0	5	4	4	44	30	31	7	7	3	4	3	5	79	74	68
59.3333	3	0	1	5	4	4	46	33	27	7	4	2	4	4	4	81	76	66
59.5	2	2	1	5	5	5	44	32	32	8	7	4	2	3	7	71	79	68
59.6667	3	2	2	3	3	5	45	32	31	8	6	2	4	6	5	78	75	66
59.8333	1	4	3	5	3	4	45	32	29	8	6	3	4	4	4	76	75	69
60	3	2	2	5	3	5	44	34	28	11	6	4	4	4	4	81	76	72
60.1667	2	2	0	4	3	3	42	35	28	11	8	3	6	6	3	81	74	68
60.3333	2	4	2	4	4	5	42	33	30	7	8	5	4	5	4	78	78	67
60.5	5	2	2	6	4	4	44	33	28	9	5	2	5	6	4	77	78	64
60.6667	3	2	2	5	4	4	44	33	29	9	6	4	4	3	6	79	71	66
60.8333	4	4	2	5	4	4	44	31	30	8	7	3	5	5	6	78	76	71
61	4	1	2	7	4	2	45	35	29	7	5	4	5	4	3	79	76	66
61.1667	3	3	2	6	5	6	46	33	32	9	5	5	3	4	4	82	78	66
61.3333	3	2	2	6	5	4	44	31	33	9	6	3	4	4	6	79	76	65
61.5	3	2	2	5	4	7	41	34	29	8	7	3	3	5	5	78	75	69
61.6667	3	0	1	6	3	3	42	32	33	8	5	4	6	3	5	82	77	68
61.8333	3	2	3	6	4	5	46	33	31	8	6	6	5	4	5	83	73	67
62	6	3	1	3	4	6	46	34	33	8	6	3	4	5	5	78	76	68
62.1667	5	2	1	5	3	5	43	33	34	9	5	2	4	5	5	81	77	70
62.3333	2	3	3	4	6	3	44	30	29	7	7	6	5	4	2	81	72	69
62.5	2	2	2	6	3	2	40	35	32	7	5	4	5	4	6	79	75	69
62.6667	2	1	0	7	4	5	45	31	30	10	7	2	5	5	4	80	72	70
62.8333	4	1	3	5	7	4	46	32	33	10	6	5	4	6	5	81	70	65
63	3	2	1	4	4	4	46	33	29	9	8	4	4	5	3	81	76	72
63.1667	4	2	1	3	4	5	44	32	29	8	5	4	6	5	5	78	74	71
63.3333	3	3	1	5	4	5	41	33	33	8	7	4	4	6	3	82	76	69
63.5	4	2	2	4	4	6	44	32	30	10	6	4	6	4	6	81	74	68
63.6667	2	1	3	5	3	3	43	35	31	8	6	4	5	4	5	83	76	68
63.8333	4	2	1	5	5	6	43	31	33	11	7	6	5	5	5	76	79	70
64	3	0	3	4	3	3	42	32	31	8	7	6	5	3	5	76	77	68
64.1667	3	1	2	5	5	3	41	32	31	9	7	4	5	7	6	78	75	69
64.3333	1	2	1	5	5	4	43	31	30	9	4	4	3	7	6	77	77	68
64.5	2	2	4	4	4	5	43	35	32	9	6	4	5	4	5	79	76	68
64.6667	2	4	2	4	2	5	41	32	31	7	7	4	3	6	5	81	76	69
64.8333	4	1	1	5	4	5	42	28	30	7	5	4	5	4	7	81	73	68
65	2	3	3	5	3	4	41	32	34	8	8	5	3	6	6	79	70	70
65.1667	2	1	1	6	3	2	44	32	28	8	5	5	5	5	6	77	75	71
65.3333	2	2	3	3	4	5	47	30	30	8	7	4	6	3	4	78	73	67
65.5	3	3	4	5	5	3	45	34	32	9	7	4	5	3	7	80	77	65
65.6667	4	1	2	3	4	5	41	32	29	9	6	3	4	5	7	77	74	65
65.8333	4	2	2	5	2	3	43	33	33	9	6	4	5	5	6	79	75	68
66	2	1	2	5	2	3	46	32	32	8	6	5	6	8	3	78	77	68
66.1667	1	2	3	6	5	4	46	33	30	8	6	3	5	6	5	82	79	69
66.3333	3	3	2	4	2	5	43	32	32	9	7	3	4	4	7	82	75	67
66.5	5	3	2	6	4	4	43	33	29	9	6	5	4	5	6	77	74	67
66.6667	4	1	1	4	5	4	45	31	31	7	5	4	6	7	5	79	78	67
66.8333	3	3	2	4	3	5	48	31	29	11	7	4	6	6	6	74	76	69
67	2	2	3	6	4	4	45	32	31	12	7	5	4	6	5	78	75	72
67.1667	3	2	1	5	4	4	44	34	29	9	7	3	4	4	5	80	78	72
67.3333	3	2	1	3	4	5	47	34	27	6	6	3	4	6	4	77	73	67
67.5	3	2	1	5	3	5	44	32	29	9	7	4	4	5	7	76	74	70
67.6667	1	1	2	4	5	5	41	33	30	8	4	3	4	5	6	80	75	68
67.8333	2	1	4	5	4	4	45	30	32	8	6	5	7	4	4	78	74	67
68	4	2	3	4	3	4	42	32	31	9	8	4	5	6	6	80	76	69
68.1667	4	2	3	4	5	3	45	32	29	9	6	4	5	4	6	77	77	68
68.3333	3	3	4	5	4	3	43	32	31	8	8	6	5	6	6	79	76	64
68.5	2	2	3	5	2	4	43	35	29	10	7	4	6	4	3	72	75	68
68.6667	4	2	2	5	3	3	42	32	30	10	7	4	4	4	6	81	75	67
68.8333	4	3	2	5	3	3	45	33	34	10	7	2	6	6	6	77	74	68
69	2	3	1	5	5	5	44	32	31	7	6	5	3	6	7	82	77	68
69.1667	4	3	3	2	3	5	45	30	30	11	7	5	4	6	5	84	76	68
69.3333	1	3	2	6	5	4	42	34	34	7	7	3	3	6	4	81	75	65
69.5	4	2	0	5	4	6	42	33	31	8	6	4	4	5	6	82	78	66
69.6667	3	2	0	4	3	6	43	34	28	9	7	2	5	4	10	79	76	67
69.8333	2	2	4	5	5	4	44	33	28	9	7	4	6	5	6	81	77	66
70	4	3	4	5	3	3	41	30	32	10	6	7	3	5	8	77	78	66
70.1667	4	2	3	4	5	5	42	31	30	9	7	5	5	5	5	78	76	69
70.3333	1	3	2	6	3	4	42	32	31	10	7	5	4	6	6	79	78	67
70.5	2	1	2	7	3	6	42	33	34	10	6	3	5	5	6	75	76	68
70.6667	2	2	2	4	5	5	42	36	30	11	7	2	4	4	7	80	76	68
70.8333	2	2	1	5	4	6	42	32	33	9	6	5	3	5	7	77	76	68
71	3	2	3	5	4	3	42	32	29	11	5	7	5	4	8	81	73	72
71.1667	0	2	3	4	5	2	42	34	34	9	7	3	5	5	7	82	76	69
71.3333	2	2	3	5	6	4	46	31	32	8	5	4	5	8	7	80	77	65
71.5	4	2	2	6	4	5	43	32	29	10	7	5	5	5	8	79	77	67
71.6667	3	3	2	5	4	4	43	33	29	8	8	3	5	6	7	81	75	72
71.8333	4	1	3	5	2	3	43	32	31	8	6	4	3	5	6	76	78	70
72	4	2	2	6	5	5	41	33	32	10	5	4	4	4	6	80	82	70
72.1667	1	2	2	4	5	4	42	34	28	9	6	4	4	5	8	83	79	67
72.3333	3	1	2	4	4	3	42	33	31	8	6	4	5	8	8	83	78	68
72.5	3	4	2	4	2	4	43	30	31	10	6	4	3	3	8	79	76	71
72.6667	3	4	1	5	6	3	46	31	29	9	7	5	5	7	6	82	76	71
72.8333	3	1	4	5	5	4	40	30	29	7	8	3	5	7	7	79	73	69
73	3	2	2	4	4	6	44	31	32	8	8	4	4	6	6	77	77	73
73.1667	4	3	1	4	4	5	39	34	31	9	7	4	5	7	7	82	74	67
73.3333	2	2	2	6	4	4	40	32	32	9	6	3	3	7	8	79	75	68
73.5	3	2	2	4	5	4	42	32	30	10	7	5	5	5	5	80	78	68
73.6667	2	3	3	3	3	5	39	33	29	9	9	4	4	8	7	79	83	70
73.8333	3	2	2	4	3	4	44	29	33	10	7	3	4	6	6	78	79	66
74	4	3	1	4	3	5	44	33	32	9	8	5	5	7	8	85	75	67
74.1667	2	3	2	5	3	5	43	33	30	10	7	5	5	5	8	80	75	68
74.3333	3	3	3	5	2	5	45	30	28	7	9	5	6	6	8	83	76	70
74.5	3	3	2	6	5	4	42	34	31	9	7	4	5	4	7	80	80	69
74.6667	5	1	3	4	3	4	42	32	29	10	4	5	4	6	6	79	78	71
74.8333	4	2	1	5	4	4	42	33	32	11	7	4	5	6	8	76	78	67
75	2	2	1	6	4	5	43	32	32	8	8	2	5	5	9	77	76	71
75.1667	2	2	2	5	4	4	42	30	30	9	6	2	4	5	7	81	75	70
75.3333	4	2	2	6	4	3	44	34	29	9	7	5	5	7	7	83	75	71
75.5	2	2	3	7	5	1	43	31	30	11	6	6	4	6	9	79	74	69
75.6667	3	2	3	3	6	2	44	32	32	9	7	5	5	6	8	79	75	69
75.8333	2	1	3	4	4	4	44	34	31	9	9	4	6	6	9	79	76	67
76	3	2	1	3	4	4	41	35	31	10	7	5	6	4	8	82	74	69
76.1667	3	1	2	4	4	6	42	31	30	10	7	4	5	6	9	78	79	67
76.3333	3	2	2	5	4	4	43	32	32	10	7	4	5	6	7	78	78	68
76.5	4	2	3	5	4	3	42	34	32	10	6	5	6	6	7	79	77	69
76.6667	3	0	2	6	4	4	45	34	29	10	6	5	5	6	8	80	77	66
76.8333	4	1	2	6	5	4	43	33	30	12	6	4	5	7	11	78	77	66
77	4	3	1	5	4	5	39	31	31	11	7	4	6	5	11	80	79	70
77.1667	3	2	2	4	3	4	41	30	34	10	8	4	5	7	8	84	77	71
77.3333	3	2	4	6	5	4	44	31	29	10	7	5	4	7	11	81	76	70
77.5	3	3	1	5	4	4	42	33	28	11	7	4	4	6	9	77	79	70
77.6667	2	1	2	5	2	5	43	30	29	11	6	4	4	7	10	83	76	68
77.8333	2	2	4	4	5	6	42	31	30	10	7	5	4	7	10	79	78	69
78	4	4	3	4	3	4	45	32	29	11	7	4	3	6	11	80	77	70
78.1667	4	3	2	5	5	1	43	32	30	11	7	4	5	7	9	81	75	66
78.3333	1	3	1	5	2	5	44	33	29	8	10	4	5	6	10	81	79	66
78.5	3	2	2	6	6	5	40	32	31	10	6	3	4	8	10	81	79	68
78.6667	2	1	3	4	4	4	43	32	32	9	5	4	5	6	7	81	77	68
78.8333	4	3	0	5	3	4	42	32	31	8	8	2	6	6	8	82	80	67
79	3	2	1	5	3	3	40	30	28	11	7	2	6	5	9	80	80	70
79.1667	4	1	3	5	3	4	42	33	31	10	6	4	5	7	9	82	76	72
79.3333	5	1	0	7	4	5	39	29	31	11	7	3	5	7	8	85	75	69
79.5	4	2	1	6	4	5	42	33	29	11	6	3	4	7	11	79	77	70
79.6667	3	3	2	5	4	5	43	33	29	12	6	4	6	7	10	81	74	70
79.8333	3	2	3	4	5	3	41	32	28	9	7	6	5	7	12	79	76	65
80	4	3	1	4	4	4	42	32	29	9	7	3	5	7	11	78	76	69
80.1667	3	3	2	4	4	3	42	29	31	11	7	4	5	6	12	81	78	70
80.3333	3	1	2	6	6	5	44	29	30	10	5	5	6	6	10	81	75	68
80.5	4	2	4	5	5	4	42	31	28	10	7	4	4	6	11	79	78	69
80.6667	2	2	3	6	6	5	42	31	27	9	6	4	5	7	11	81	79	75
80.8333	2	3	3	5	5	5	45	33	28	9	7	4	3	7	11	81	76	67
81	4	3	2	3	5	4	40	32	29	12	8	6	5	9	9	78	77	68
81.1667	3	3	3	4	6	6	45	32	29	7	7	4	6	6	10	79	80	69
81.3333	2	2	2	5	4	6	41	30	29	9	6	3	5	7	11	82	74	72
81.5	3	2	3	5	2	5	40	33	31	10	7	5	4	6	12	81	78	72
81.6667	5	2	1	6	4	4	44	34	32	10	6	4	5	7	11	80	77	70
81.8333	3	1	3	3	5	3	43	35	30	10	7	4	4	5	12	80	75	70
82	4	3	4	5	3	6	42	31	29	11	8	4	6	8	14	80	74	68
82.1667	2	2	2	5	5	7	39	33	31	10	6	5	5	6	10	82	77	70
82.3333	4	2	3	4	3	4	45	34	29	10	7	5	6	6	10	82	77	70
82.5	3	1	0	4	4	4	42	30	30	9	7	3	3	6	10	77	77	68
82.6667	3	2	0	3	4	3	43	30	32	12	7	5	6	8	12	81	78	70
82.8333	3	0	2	4	6	5	43	33	29	9	7	3	6	7	12	79	78	71
83	4	3	3	5	4	5	43	33	33	11	9	4	6	6	11	84	78	68
83.1667	4	2	2	7	4	5	41	31	31	10	6	5	4	9	12	79	80	67
83.3333	3	1	2	4	3	4	41	31	31	9	5	4	4	8	14	77	74	70
83.5	4	2	2	4	4	5	42	32	31	11	7	3	4	9	12	81	77	68
83.6667	2	2	2	6	3	6	40	31	30	9	8	5	3	8	11	80	79	68
83.8333	2	4	0	6	3	4	45	34	30	7	7	2	5	8	10	82	73	69
84	3	2	2	6	4	4	40	34	28	9	5	5	5	8	12	80	79	72
84.1667	3	2	2	5	6	4	40	32	32	11	6	4	4	8	11	81	82	70
84.3333	2	2	3	5	4	4	40	34	30	9	7	4	4	7	14	81	77	70
84.5	4	1	0	3	3	4	46	30	28	8	6	3	4	7	14	80	78	69
84.6667	3	2	1	5	4	3	40	30	29	9	5	4	5	10	14	79	75	70
84.8333	3	3	3	6	5	3	42	32	28	11	5	5	3	8	14	81	84	68
85	5	2	2	5	2	5	42	34	30	9	7	6	4	8	12	80	79	70
85.1667	3	3	3	6	4	3	44	31	28	9	6	7	4	7	15	78	78	74
85.3333	3	2	1	5	5	5	45	31	29	7	5	4	3	9	12	82	78	64
85.5	2	3	4	5	4	4	40	32	29	11	5	6	6	8	14	80	82	72
85.6667	1	3	2	6	5	5	42	34	30	8	7	4	3	8	10	80	76	72
85.8333	3	1	2	5	3	5	45	32	27	10	6	4	6	10	11	81	81	70
86	2	3	4	5	2	4	44	32	27	9	7	3	6	9	15	81	74	67
86.1667	4	3	3	6	5	4	43	29	32	11	8	4	4	11	13	79	78	68
86.3333	4	3	3	3	5	4	44	32	30	8	9	7	3	8	13	78	79	72
86.5	3	2	3	6	3	4	44	33	32	10	7	5	5	7	12	78	79	73
86.6667	1	3	2	5	4	6	45	35	30	7	6	4	4	10	14	80	78	72
86.8333	3	2	1	4	3	4	43	32	30	10	4	3	5	7	15	80	78	70
87	3	3	1	8	4	6	42	32	29	7	5	3	3	9	13	81	80	69
87.1667	3	0	2	5	3	5	40	33	32	10	7	4	4	10	15	82	78	70
87.3333	2	4	3	6	5	4	44	31	28	8	7	5	5	9	13	82	84	70
87.5	4	3	2	5	4	5	40	31	31	8	7	5	4	9	15	78	73	72
87.6667	2	2	3	6	4	4	38	34	28	10	6	3	5	8	15	78	78	68
87.8333	3	3	2	6	4	5	39	33	30	10	9	4	4	9	15	82	77	70
88	3	2	3	6	6	4	42	31	30	8	4	3	4	10	15	85	77	69
88.1667	1	1	0	6	3	5	43	30	30	7	6	3	4	7	16	80	74	67
88.3333	1	2	3	5	4	6	41	35	28	8	5	4	6	10	14	84	80	70
88.5	1	2	2	5	4	5	40	34	29	10	5	4	5	10	13	76	80	69
88.6667	4	3	3	4	5	6	40	31	31	11	7	3	5	8	17	79	79	72
88.8333	3	2	0	4	5	5	43	32	29	9	4	1	5	7	15	76	79	68
89	1	0	1	5	3	3	42	34	32	10	4	3	4	8	15	79	76	72
89.1667	3	2	4	5	4	5	41	30	32	8	6	4	4	9	15	81	77	68
89.3333	3	3	2	4	4	4	43	32	28	6	9	3	5	8	16	82	79	71
89.5	1	3	2	3	3	6	42	30	29	8	5	3	4	10	16	80	78	73
89.6667	2	0	2	6	4	5	43	31	29	6	5	4	4	7	15	81	81	70
89.8333	3	3	2	5	4	4	43	35	31	8	6	4	5	8	16	78	82	68
90	3	1	1	5	5	5	45	32	31	8	6	4	5	9	18	82	78	65
90.1667	4	2	3	4	5	3	44	31	28	9	5	4	5	11	14	83	77	68
90.3333	3	2	5	5	2	5	44	31	29	8	5	4	4	10	14	78	77	70
90.5	3	3	1	7	5	5	43	31	29	10	6	3	4	11	17	80	76	71
90.6667	3	3	2	6	3	3	39	31	31	8	6	3	6	10	18	79	77	68
90.8333	2	3	2	5	6	5	41	32	32	9	5	3	4	9	16	79	77	64
91	4	2	2	7	4	6	42	33	28	8	6	4	5	10	16	77	78	71
91.1667	3	4	1	4	5	5	39	31	29	7	5	2	5	11	17	80	74	69
91.3333	3	0	3	2	4	5	40	33	29	6	5	5	5	10	16	82	79	67
91.5	3	0	3	6	5	4	43	32	28	9	5	5	4	9	19	80	80	71
91.6667	3	2	2	5	3	3	42	32	31	6	8	2	4	9	18	75	73	72
91.8333	3	3	2	6	4	5	43	30	31	9	6	5	6	10	19	78	75	69
92	1	2	2	4	4	6	43	34	31	7	6	4	3	11	19	76	74	71
92.1667	4	2	2	5	6	4	41	32	31	8	6	4	5	9	17	75	77	70
92.3333	4	4	2	6	4	5	38	30	30	8	5	3	5	9	18	81	77	68
92.5	2	1	3	4	4	5	42	32	30	9	6	4	6	8	20	78	77	72
92.6667	2	1	1	4	4	4	41	32	29	7	3	4	5	8	17	78	78	67
92.8333	2	4	3	5	6	4	43	33	29	8	6	4	6	10	19	77	75	71
93	3	1	1	5	3	4	39	34	31	7	5	4	6	10	18	76	77	69
93.1667	3	2	2	4	4	5	41	30	32	8	6	4	6	11	20	77	78	65
93.3333	3	2	2	7	5	4	42	30	29	7	6	3	6	11	19	75	77	68
93.5	5	2	3	6	4	4	39	30	30	10	5	4	3	9	18	77	78	67
93.6667	4	1	1	5	5	5	45	32	30	8	5	4	4	12	18	76	77	69
93.8333	3	2	3	8	5	4	44	32	30	6	5	4	3	9	18	76	80	69
94	1	3	1	6	5	5	42	33	30	7	5	4	5	10	17	74	79	69
94.1667	2	2	1	5	4	6	43	28	32	6	6	3	5	11	18	78	79	66
94.3333	3	3	1	4	3	6	42	33	30	7	6	3	5	11	20	79	80	68
94.5	4	4	3	5	5	5	41	30	29	8	6	5	6	9	16	80	77	69
94.6667	2	2	2	3	3	5	40	32	32	8	4	4	4	10	20	78	78	70
94.8333	3	2	1	5	3	4	45	33	29	10	3	2	4	11	18	80	76	69
95	2	2	4	5	3	5	41	34	28	7	6	5	6	9	16	79	77	70
95.1667	3	0	3	3	3	4	43	30	28	7	4	4	5	11	19	76	78	70
95.3333	3	1	2	5	5	3	42	32	30	8	5	3	4	12	19	77	75	70
95.5	4	2	4	5	3	4	41	32	29	9	4	4	4	10	20	77	74	69
95.6667	3	2	2	5	3	5	43	33	30	7	6	4	4	11	17	79	75	70
95.8333	1	4	3	5	4	4	42	32	31	6	5	4	3	12	17	78	77	69
96	2	2	3	6	5	3	40	31	30	8	6	4	4	11	18	77	74	70

## Sheet: Supplementary_fig1a
Time Elapsed (hours)	WT tauRD 10uM			P301S tauRD 10uM			S320F tauRD 10uM
0	2	1	2	5	3	3	15	17	14
0.166667	1	2	3	2	2	2	13	11	15
0.333333	2	0	0	4	2	0	15	12	13
0.5	4	2	0	4	0	3	12	10	13
0.666667	2	1	3	2	2	3	15	13	11
0.833333	3	1	2	4	2	0	14	13	10
1	1	2	1	3	1	1	12	12	12
1.16667	2	2	0	2	3	1	14	12	12
1.33333	1	2	0	2	2	0	14	12	12
1.5	3	0	3	2	1	3	17	13	12
1.66667	0	2	1	2	4	1	15	12	11
1.83333	3	2	2	3	2	1	14	12	14
2	3	2	3	3	2	3	19	11	14
2.16667	3	2	2	3	2	2	21	14	13
2.33333	2	1	2	3	1	3	15	12	15
2.5	2	0	2	1	1	1	20	12	13
2.66667	0	2	0	2	2	3	15	11	12
2.83333	0	2	1	1	2	2	17	13	13
3	2	1	1	3	2	2	14	14	12
3.16667	3	3	3	4	5	1	20	15	13
3.33333	1	1	1	2	2	1	20	15	14
3.5	2	1	2	2	1	3	21	12	14
3.66667	2	2	2	3	2	3	19	10	15
3.83333	1	0	0	2	0	1	18	15	13
4	2	2	1	2	4	2	16	13	13
4.16667	2	2	1	3	2	1	19	14	14
4.33333	2	2	2	3	2	2	21	13	15
4.5	0	1	1	3	2	3	20	14	12
4.66667	1	3	2	3	3	2	17	14	17
4.83333	1	2	0	2	4	1	23	15	15
5	0	1	2	1	3	1	21	15	13
5.16667	2	0	2	2	1	2	20	12	17
5.33333	1	1	3	2	2	2	19	15	14
5.5	1	2	2	3	2	2	18	14	15
5.66667	1	0	3	1	3	2	24	13	16
5.83333	2	2	2	2	2	2	21	15	14
6	0	1	1	1	2	0	22	15	15
6.16667	2	-1	3	2	1	3	21	14	14
6.33333	1	2	1	2	2	2	21	14	14
6.5	1	0	0	2	1	1	19	13	12
6.66667	0	1	2	0	1	2	18	14	14
6.83333	1	-1	2	3	0	1	23	13	15
7	0	2	0	3	1	0	21	14	14
7.16667	1	0	0	1	1	1	22	15	16
7.33333	2	1	0	2	2	1	20	12	15
7.5	-1	1	2	0	2	2	21	13	13
7.66667	1	0	2	2	2	3	24	14	15
7.83333	1	0	3	1	0	2	21	15	13
8	2	2	1	2	2	0	21	12	15
8.16667	2	3	0	3	5	0	20	14	16
8.33333	2	1	3	3	2	1	21	15	14
8.5	1	0	1	2	2	1	20	13	13
8.66667	2	2	2	3	2	2	21	13	14
8.83333	1	0	0	0	2	1	22	16	15
9	2	0	2	3	1	2	20	14	15
9.16667	2	0	2	3	2	2	19	14	13
9.33333	1	2	3	2	2	2	21	15	14
9.5	2	2	2	2	2	1	21	17	13
9.66667	1	2	2	4	2	3	19	14	15
9.83333	3	1	0	4	3	1	21	15	14
10	1	1	0	2	2	1	19	15	14
10.1667	1	0	3	2	1	2	21	12	13
10.3333	1	3	2	1	4	1	22	15	13
10.5	3	1	1	4	3	2	21	14	13
10.6667	0	0	0	2	1	1	21	14	14
10.8333	0	1	0	3	3	0	19	13	12
11	-1	3	1	2	4	0	22	12	14
11.1667	1	1	2	2	2	3	20	13	13
11.3333	2	1	3	5	3	1	19	14	13
11.5	2	3	0	3	3	2	18	13	12
11.6667	1	1	1	2	2	2	20	13	13
11.8333	3	1	2	5	2	3	19	14	13
12	0	0	2	1	2	3	21	14	15
12.1667	2	1	1	3	2	2	22	15	12
12.3333	2	2	2	1	2	3	21	15	15
12.5	2	2	1	3	2	1	20	15	12
12.6667	1	3	1	2	2	0	19	15	12
12.8333	2	0	1	3	1	2	19	13	14
13	2	1	1	4	2	1	20	13	12
13.1667	2	0	2	5	2	1	20	14	14
13.3333	1	1	-1	3	2	0	21	13	14
13.5	2	3	4	3	2	2	19	12	12
13.6667	1	2	1	1	2	0	20	14	13
13.8333	0	1	0	2	1	0	21	12	14
14	2	2	1	2	3	2	20	13	13
14.1667	-1	2	1	1	2	2	21	13	13
14.3333	1	3	1	2	2	3	18	15	10
14.5	0	1	2	2	3	2	20	12	14
14.6667	2	1	1	4	3	1	20	14	13
14.8333	2	2	1	3	3	2	21	12	13
15	2	-1	2	3	3	1	19	13	14
15.1667	2	0	2	3	1	2	21	13	11
15.3333	0	1	1	3	3	2	19	13	14
15.5	1	0	0	2	1	2	19	14	13
15.6667	2	1	2	3	3	3	18	12	12
15.8333	2	1	1	4	3	1	19	13	13
16	1	0	2	2	2	3	19	13	14
16.1667	2	1	2	2	2	3	19	12	13
16.3333	1	3	2	2	4	2	18	12	12
16.5	0	2	3	2	4	2	17	12	14
16.6667	1	2	1	3	4	2	19	13	12
16.8333	2	0	1	3	2	2	19	13	12
17	1	2	1	2	2	1	19	13	13
17.1667	1	2	2	3	3	2	17	13	15
17.3333	2	3	1	3	2	0	19	13	13
17.5	1	1	1	3	2	3	17	13	12
17.6667	2	2	2	4	3	2	18	11	11
17.8333	2	1	2	3	1	3	20	12	11
18	1	0	2	0	1	3	19	11	13
18.1667	1	0	2	3	2	3	22	14	12
18.3333	1	2	2	3	2	1	16	12	11
18.5	3	2	1	4	3	1	19	11	12
18.6667	2	0	1	2	2	1	16	13	14
18.8333	2	3	1	2	2	1	20	13	11
19	0	1	2	1	2	1	18	10	12
19.1667	2	3	0	4	3	0	18	13	10
19.3333	1	0	2	4	3	2	20	14	11
19.5	1	2	0	3	3	2	17	10	12
19.6667	1	0	2	2	3	2	19	11	13
19.8333	1	1	1	2	3	3	17	11	12
20	2	2	3	5	2	3	20	10	11
20.1667	2	3	1	3	4	1	19	12	12
20.3333	4	1	1	5	2	2	19	12	13
20.5	1	1	3	3	1	3	18	12	13
20.6667	2	1	0	3	2	1	17	10	12
20.8333	1	2	1	2	3	3	16	12	10
21	1	0	1	3	1	2	18	11	12
21.1667	0	1	2	1	2	3	19	13	12
21.3333	2	1	2	3	2	3	18	13	11
21.5	1	1	0	2	2	1	19	12	13
21.6667	3	2	0	4	2	2	17	10	11
21.8333	2	1	2	3	3	1	16	12	11
22	1	0	1	4	2	2	17	9	12
22.1667	0	2	2	4	3	3	16	12	14
22.3333	1	0	1	3	3	1	18	11	11
22.5	1	1	2	3	2	2	14	12	11
22.6667	2	1	1	2	3	4	17	12	11
22.8333	1	2	4	3	1	3	19	9	9
23	1	2	1	2	2	1	17	12	13
23.1667	2	3	1	3	4	1	16	14	10
23.3333	0	0	1	2	2	2	16	9	10
23.5	2	2	2	3	3	4	15	11	11
23.6667	2	2	1	3	2	2	17	10	9
23.8333	2	2	2	3	3	4	15	10	12
24	2	1	2	2	2	3	17	10	10
24.1667	2	1	1	3	1	1	16	11	11
24.3333	2	0	1	2	1	1	18	10	11
24.5	1	1	2	3	2	2	15	11	8
24.6667	3	1	1	3	3	2	16	9	11
24.8333	2	0	1	3	2	2	17	10	10
25	2	1	2	3	5	2	17	12	12
25.1667	2	1	0	3	3	1	15	13	11
25.3333	2	1	1	1	4	2	15	11	12
25.5	2	1	0	3	3	3	15	11	11
25.6667	2	1	1	3	2	1	15	10	13
25.8333	3	2	2	3	2	2	15	12	11
26	2	1	0	3	2	0	14	11	11
26.1667	1	2	1	0	4	2	17	11	11
26.3333	0	0	2	1	2	3	18	10	12
26.5	1	0	2	0	3	3	18	9	9
26.6667	2	1	2	4	3	2	16	10	11
26.8333	2	0	2	4	1	2	15	9	9
27	3	0	1	3	3	2	15	9	9
27.1667	1	2	2	2	2	2	15	9	10
27.3333	0	0	2	1	3	1	14	10	10
27.5	1	1	2	2	2	3	16	11	11
27.6667	3	2	1	2	3	2	16	10	8
27.8333	2	1	0	1	1	1	15	9	11
28	2	0	4	2	2	3	14	9	9
28.1667	2	1	2	3	1	4	14	11	10
28.3333	0	3	1	2	3	2	14	11	11
28.5	1	1	0	3	2	2	13	11	8
28.6667	1	0	2	2	2	3	14	10	10
28.8333	0	1	1	3	1	3	15	11	9
29	2	2	2	3	2	1	16	10	11
29.1667	1	1	2	2	3	1	15	9	10
29.3333	2	2	1	3	3	2	12	11	10
29.5	0	0	2	2	3	2	14	10	9
29.6667	0	-1	2	2	1	3	15	13	11
29.8333	0	1	2	2	3	3	13	11	9
30	2	-1	2	4	1	2	14	10	7
30.1667	2	1	1	2	1	2	15	9	9
30.3333	0	2	0	3	2	2	14	8	11
30.5	0	1	0	4	4	2	13	10	9
30.6667	2	0	2	4	2	1	15	9	11
30.8333	1	0	2	3	2	2	15	10	10
31	0	1	3	3	2	4	14	11	11
31.1667	2	0	2	2	1	2	13	13	8
31.3333	4	0	2	3	4	3	15	10	9
31.5	1	2	2	3	2	1	12	8	9
31.6667	1	1	1	3	2	2	13	8	10
31.8333	2	1	1	3	2	2	13	11	9
32	2	1	1	3	1	2	13	10	9
32.1667	2	2	0	3	2	1	14	10	7
32.3333	1	2	1	3	3	2	13	10	9
32.5	1	1	1	2	2	1	12	10	10
32.6667	2	3	0	2	4	3	14	10	8
32.8333	1	2	2	2	4	3	12	10	9
33	1	0	1	2	4	1	13	9	9
33.1667	0	3	1	3	4	2	13	8	9
33.3333	1	1	2	3	4	2	16	8	10
33.5	1	0	1	3	2	1	14	10	11
33.6667	0	1	2	3	2	3	13	9	9
33.8333	2	3	0	4	4	1	14	7	10
34	1	2	0	1	2	2	13	9	9
34.1667	0	1	0	2	2	3	11	11	11
34.3333	0	1	3	2	3	2	14	7	8
34.5	4	3	2	3	4	2	13	8	8
34.6667	0	2	2	2	5	3	13	11	11
34.8333	2	0	2	2	2	3	11	9	9
35	2	2	1	3	2	1	15	9	10
35.1667	1	1	1	4	2	2	15	8	7
35.3333	1	2	1	3	3	2	13	8	10
35.5	1	2	1	1	3	1	14	9	10
35.6667	2	2	1	3	3	2	13	10	11
35.8333	1	1	2	2	3	2	15	8	10
36	1	1	1	2	3	3	14	9	10
36.1667	1	1	1	2	2	2	15	11	8
36.3333	2	1	1	4	2	2	13	8	7
36.5	2	1	1	3	3	1	12	11	9
36.6667	1	1	3	1	1	4	11	9	9
36.8333	1	1	1	2	2	0	12	9	6
37	1	2	-1	3	3	1	14	9	10
37.1667	0	2	1	1	2	2	15	8	8
37.3333	1	3	2	1	3	2	14	9	10
37.5	1	1	1	3	1	2	13	9	8
37.6667	2	2	0	3	2	2	12	9	9
37.8333	2	3	1	2	3	2	15	8	9
38	0	1	0	2	3	0	10	8	8
38.1667	1	1	1	2	3	2	13	8	10
38.3333	2	2	2	4	2	1	13	9	7
38.5	1	0	0	2	1	1	13	9	7
38.6667	2	0	3	2	1	4	11	11	11
38.8333	0	0	0	1	2	0	14	9	8
39	0	0	1	2	2	1	14	10	9
39.1667	1	0	1	1	1	1	13	11	8
39.3333	4	0	2	2	2	2	13	10	9
39.5	2	2	2	2	3	1	12	8	7
39.6667	3	1	1	3	2	0	13	10	8
39.8333	0	2	2	1	2	4	16	9	10
40	2	2	0	3	2	0	14	8	9
40.1667	2	1	1	3	4	2	12	10	9
40.3333	2	0	3	3	2	2	13	9	7
40.5	1	1	2	3	2	2	13	9	10
40.6667	1	3	2	2	2	2	13	9	8
40.8333	0	0	3	4	2	4	12	10	8
41	3	0	1	3	2	1	13	8	10
41.1667	2	0	0	2	1	1	10	8	8
41.3333	2	2	1	3	3	2	9	9	6
41.5	1	2	0	3	2	1	12	6	7
41.6667	2	1	2	3	3	1	12	7	8
41.8333	1	1	0	0	3	0	12	7	7
42	2	0	-1	2	2	0	11	8	9
42.1667	2	-1	1	3	2	1	15	9	7
42.3333	2	2	-1	4	2	1	15	8	7
42.5	2	1	1	3	2	2	12	8	9
42.6667	1	1	3	3	2	2	9	8	7
42.8333	1	2	3	2	3	2	15	8	7
43	1	1	1	3	1	2	13	8	8
43.1667	0	1	1	2	2	1	13	11	9
43.3333	1	0	1	3	2	2	13	8	11
43.5	1	2	1	5	4	1	13	8	7
43.6667	0	2	1	3	3	1	13	10	7
43.8333	1	1	3	2	3	3	13	8	7
44	2	1	2	4	2	3	12	9	8
44.1667	3	1	1	2	2	2	13	7	8
44.3333	3	2	2	4	2	3	10	9	9
44.5	2	1	-1	4	3	-1	13	9	8
44.6667	1	2	1	3	3	3	12	9	9
44.8333	2	1	2	2	2	2	11	8	9
45	0	0	1	3	0	1	14	8	9
45.1667	1	2	1	3	1	2	12	8	9
45.3333	2	1	0	3	3	2	11	9	8
45.5	0	1	1	1	2	2	12	8	9
45.6667	3	2	3	3	4	3	12	7	9
45.8333	1	2	1	3	2	2	13	7	8
46	1	1	1	2	1	3	12	10	9
46.1667	1	0	2	3	1	2	13	8	7
46.3333	1	1	0	2	1	1	13	10	8
46.5	3	1	2	4	2	1	11	7	10
46.6667	1	2	2	3	4	1	13	9	8
46.8333	2	0	1	2	3	3	10	11	9
47	2	1	2	4	1	3	13	7	6
47.1667	3	0	1	3	0	2	12	9	8
47.3333	1	2	0	2	2	1	11	8	8
47.5	3	1	1	2	2	3	10	7	8
47.6667	1	1	2	3	2	1	13	10	7
47.8333	2	-1	1	5	2	3	12	7	10
48	1	0	2	3	2	3	11	9	9
48.1667	2	3	3	4	1	3	12	9	8
48.3333	3	0	2	4	1	2	12	9	8
48.5	3	2	1	3	2	2	11	7	7
48.6667	0	0	2	2	2	1	13	6	9
48.8333	2	1	0	4	2	1	9	8	7
49	2	3	1	3	3	2	13	11	8
49.1667	2	1	2	2	3	2	10	8	7
49.3333	1	0	0	3	1	3	9	8	10
49.5	1	0	3	2	1	2	13	10	9
49.6667	2	0	2	3	0	2	13	9	7
49.8333	2	0	1	4	2	1	12	8	7
50	1	2	1	4	2	3	13	9	10
50.1667	1	1	2	3	2	3	11	8	8
50.3333	3	1	2	4	2	3	12	8	8
50.5	2	3	1	2	4	3	12	7	7
50.6667	2	1	2	3	2	3	12	9	8
50.8333	1	1	0	2	3	2	12	9	8
51	1	1	1	2	2	1	11	7	8
51.1667	1	1	1	2	2	1	11	9	7
51.3333	1	2	1	2	2	2	13	8	8
51.5	2	0	2	4	1	2	12	8	11
51.6667	1	0	0	3	1	0	9	8	9
51.8333	2	1	2	3	1	3	11	9	9
52	1	2	0	2	4	2	11	8	7
52.1667	1	2	3	2	3	0	11	9	8
52.3333	1	2	1	3	2	2	12	7	8
52.5	0	1	1	3	2	1	12	8	8
52.6667	1	0	1	2	3	1	11	9	8
52.8333	1	2	2	1	3	1	13	8	9
53	1	1	1	1	2	1	13	4	7
53.1667	2	1	3	4	2	4	11	7	9
53.3333	1	2	1	4	3	2	11	9	9
53.5	1	2	3	3	2	2	11	7	10
53.6667	1	2	2	1	3	1	12	8	7
53.8333	3	1	1	3	3	2	11	8	7
54	2	2	0	3	2	1	12	7	8
54.1667	3	3	2	3	3	2	11	7	8
54.3333	3	1	2	3	2	2	13	8	9
54.5	2	2	2	3	2	3	12	6	8
54.6667	2	1	1	3	2	2	11	6	8
54.8333	2	1	2	3	2	2	11	9	7
55	2	2	2	2	2	3	12	7	7
55.1667	3	1	1	3	1	3	11	8	9
55.3333	0	1	1	1	3	1	12	6	7
55.5	2	1	2	3	1	3	12	8	8
55.6667	2	1	2	2	1	3	12	6	8
55.8333	1	0	3	1	1	0	11	9	7
56	1	0	3	3	2	2	10	6	5
56.1667	2	2	0	4	3	1	11	10	7
56.3333	2	1	3	3	2	2	11	7	9
56.5	2	2	1	3	2	1	10	6	9
56.6667	2	1	1	2	2	2	11	6	8
56.8333	0	2	2	1	3	2	10	8	7
57	2	2	2	3	2	2	11	7	9
57.1667	2	-1	2	1	1	2	12	6	8
57.3333	2	2	1	4	3	2	11	6	9
57.5	2	-1	1	2	0	1	9	8	6
57.6667	0	1	0	3	2	1	8	6	8
57.8333	3	1	2	4	3	2	12	9	9
58	2	0	2	2	1	3	11	7	9
58.1667	3	0	3	3	1	4	13	7	9
58.3333	2	1	0	3	3	1	9	7	8
58.5	2	1	1	3	2	1	12	7	7
58.6667	3	1	1	2	1	1	8	8	7
58.8333	2	0	2	3	2	1	12	8	7
59	2	1	2	2	2	2	11	8	7
59.1667	2	2	2	2	3	2	12	7	8
59.3333	0	0	1	1	2	2	10	8	8
59.5	1	0	1	1	2	2	10	7	8
59.6667	2	2	0	2	2	2	13	6	7
59.8333	-1	1	1	2	1	1	10	7	8
60	3	1	3	3	1	2	11	6	8
60.1667	1	0	0	2	2	0	10	7	8
60.3333	1	2	2	2	4	3	10	9	6
60.5	3	1	-1	3	3	1	11	7	9
60.6667	2	2	2	4	3	2	11	8	8
60.8333	1	3	1	4	3	3	11	9	6
61	0	1	1	3	2	2	11	8	8
61.1667	2	1	2	3	3	3	11	7	8
61.3333	1	1	0	3	2	1	9	6	8
61.5	0	2	1	1	3	1	13	8	7
61.6667	-1	1	2	2	2	2	11	9	5
61.8333	1	3	1	1	1	2	9	6	7
62	2	1	2	4	1	1	9	6	7
62.1667	1	1	2	3	2	1	9	10	7
62.3333	0	1	1	1	3	3	12	7	9
62.5	-1	0	1	2	2	2	11	9	8
62.6667	2	0	0	4	2	1	12	10	8
62.8333	3	1	2	4	2	3	9	9	8
63	2	1	0	3	3	0	11	6	6
63.1667	2	2	2	2	2	1	12	5	8
63.3333	1	2	0	2	3	1	8	7	8
63.5	2	1	1	2	2	2	9	5	6
63.6667	0	2	2	1	1	1	9	8	10
63.8333	2	2	2	3	2	2	8	7	7
64	2	-1	2	2	3	3	10	9	8
64.1667	1	1	1	4	2	1	10	7	7
64.3333	0	1	1	2	2	2	12	6	7
64.5	2	1	2	4	3	2	9	6	6
64.6667	0	1	1	2	3	3	10	10	7
64.8333	2	1	0	3	1	0	9	7	6
65	0	2	2	1	2	3	11	7	8
65.1667	2	-1	2	4	0	2	10	5	6
65.3333	0	1	1	1	1	2	12	9	8
65.5	2	0	3	2	3	2	10	8	7
65.6667	2	0	1	2	1	2	9	7	7
65.8333	2	0	2	2	2	2	10	7	6
66	2	1	3	2	1	4	10	8	5
66.1667	1	2	2	1	3	1	9	5	8
66.3333	3	2	1	3	3	1	9	7	8
66.5	1	1	0	2	2	1	11	6	6
66.6667	1	0	2	2	1	2	9	6	7
66.8333	3	2	3	2	2	3	10	9	8
67	1	1	2	3	2	1	12	9	7
67.1667	2	1	0	2	2	1	10	10	5
67.3333	2	-1	0	2	0	3	11	7	7
67.5	1	1	1	4	1	1	10	9	10
67.6667	2	0	1	1	2	1	10	6	7
67.8333	1	1	2	0	2	3	12	6	6
68	1	2	1	3	2	2	10	8	6
68.1667	2	1	1	5	1	1	10	7	6
68.3333	2	1	1	2	2	3	9	6	6
68.5	1	0	3	1	1	2	10	8	8
68.6667	2	1	3	2	1	1	11	7	6
68.8333	3	1	-1	3	3	0	9	8	7
69	1	0	2	2	2	2	9	7	6
69.1667	3	1	2	3	2	2	11	8	7
69.3333	1	0	2	1	2	2	10	6	8
69.5	1	0	1	3	2	2	12	7	7
69.6667	1	1	1	2	2	0	10	9	7
69.8333	1	2	2	2	2	1	10	8	7
70	3	1	5	4	2	3	8	8	6
70.1667	0	1	2	3	1	3	10	8	7
70.3333	-1	1	1	1	3	2	8	5	7
70.5	2	-1	0	2	3	0	10	6	8
70.6667	2	1	1	3	1	0	10	8	8
70.8333	1	2	1	1	2	3	8	8	8
71	2	1	2	3	2	3	11	7	6
71.1667	-2	1	1	0	3	2	11	9	8
71.3333	0	0	4	1	2	3	12	8	7
71.5	3	1	1	3	2	2	12	6	8
71.6667	1	2	2	1	3	2	11	6	7
71.8333	2	0	3	3	1	3	10	7	6
72	2	1	1	3	2	2	9	8	6
72.1667	1	1	1	2	2	2	9	8	7
72.3333	1	1	1	2	2	2	10	8	7
72.5	1	2	2	2	1	2	11	7	7
72.6667	2	2	3	3	3	3	10	8	7
72.8333	-1	0	3	2	2	2	10	7	9
73	2	1	1	2	2	2	12	7	7
73.1667	2	3	2	1	3	2	11	6	7
73.3333	1	2	0	2	3	1	9	8	7
73.5	3	2	3	4	3	2	7	7	9
73.6667	1	2	2	2	2	3	11	7	6
73.8333	3	1	1	3	2	1	9	8	8
74	0	1	1	1	3	1	11	7	7
74.1667	2	1	1	3	3	0	12	6	7
74.3333	1	3	2	2	2	1	11	8	6
74.5	0	1	1	2	3	2	8	5	6
74.6667	3	1	2	3	1	3	9	7	7
74.8333	2	1	0	3	2	2	10	6	7
75	-1	1	-1	0	2	1	9	5	7
75.1667	3	1	0	4	1	1	9	6	7
75.3333	3	-1	0	2	1	3	12	7	5
75.5	2	2	2	1	2	3	11	8	6
75.6667	1	1	2	4	2	3	9	5	6
75.8333	0	3	2	1	1	1	10	8	6
76	2	1	0	3	1	2	10	7	7
76.1667	3	2	3	4	2	2	10	7	6
76.3333	2	0	1	3	1	1	10	7	6
76.5	2	0	1	3	0	3	11	8	8
76.6667	2	0	2	3	2	3	10	9	6
76.8333	2	1	1	3	2	1	10	6	9
77	3	2	0	4	3	1	9	7	8
77.1667	2	1	1	4	2	1	10	8	8
77.3333	3	1	3	3	2	5	10	8	7
77.5	3	1	1	3	2	0	11	7	7
77.6667	1	0	1	3	1	2	10	7	6
77.8333	2	1	2	2	2	2	8	6	6
78	3	1	2	3	4	3	13	7	6
78.1667	1	0	2	3	2	2	9	4	6
78.3333	0	2	2	2	3	2	10	10	7
78.5	2	0	0	3	1	1	10	7	8
78.6667	1	-1	1	1	1	4	10	7	6
78.8333	3	2	-1	4	2	1	9	6	7
79	2	1	1	3	3	0	9	7	6
79.1667	2	0	1	2	1	0	10	7	7
79.3333	3	1	2	3	2	2	10	7	7
79.5	3	1	1	2	2	1	9	7	7
79.6667	3	2	1	3	4	2	9	7	7
79.8333	1	1	2	3	1	2	8	8	6
80	2	0	1	3	1	2	10	8	8
80.1667	2	2	1	4	3	1	9	7	7
80.3333	2	1	1	3	2	2	11	6	6
80.5	2	1	1	2	1	3	10	7	7
80.6667	3	1	1	3	1	2	7	8	7
80.8333	1	1	1	2	2	3	10	7	8
81	3	1	3	3	2	2	10	7	8
81.1667	1	1	3	2	2	2	12	6	6
81.3333	0	2	3	0	3	1	8	7	7
81.5	1	1	2	2	3	3	10	7	5
81.6667	4	2	0	4	2	2	9	9	6
81.8333	1	1	1	2	2	2	9	6	8
82	2	3	2	5	2	2	9	7	10
82.1667	2	0	2	3	1	3	11	6	8
82.3333	1	1	2	3	3	4	9	7	4
82.5	1	0	0	3	3	3	9	6	6
82.6667	4	1	1	3	2	2	9	7	7
82.8333	2	1	3	4	1	1	10	7	7
83	2	2	2	4	3	3	12	7	6
83.1667	2	0	0	3	1	2	9	8	8
83.3333	2	0	1	3	-1	3	9	5	8
83.5	1	2	1	3	1	3	9	7	9
83.6667	1	1	1	2	2	2	11	7	8
83.8333	0	2	0	2	3	0	9	7	8
84	1	0	1	2	1	0	9	7	7
84.1667	1	1	2	3	1	2	10	7	8
84.3333	2	2	1	2	2	3	9	6	6
84.5	2	0	1	3	2	1	11	7	7
84.6667	1	1	1	1	2	2	10	5	5
84.8333	2	0	2	3	2	4	10	6	6
85	1	2	2	3	2	3	10	7	7
85.1667	1	1	2	2	2	3	9	6	7
85.3333	2	0	0	4	1	1	9	6	8
85.5	1	0	4	1	2	3	9	7	8
85.6667	1	2	2	2	3	2	10	7	6
85.8333	2	-1	2	3	1	2	10	5	6
86	1	3	2	2	2	2	9	7	7
86.1667	2	2	1	3	3	2	10	8	7
86.3333	2	4	3	3	4	4	11	6	5
86.5	2	0	2	3	2	1	11	6	9
86.6667	0	1	1	2	1	3	10	6	8
86.8333	2	0	0	3	1	0	12	7	8
87	1	2	1	2	1	2	12	7	7
87.1667	2	0	1	3	1	2	11	7	7
87.3333	2	2	3	2	4	2	10	7	8
87.5	1	1	3	3	2	1	10	7	5
87.6667	1	2	2	3	2	2	10	6	8
87.8333	1	1	2	2	2	1	10	10	7
88	1	1	2	3	1	2	11	6	6
88.1667	-1	2	0	2	3	1	11	7	7
88.3333	0	0	2	1	1	4	10	8	8
88.5	-1	1	1	2	1	1	10	8	7
88.6667	3	4	2	3	3	2	9	7	9
88.8333	2	1	0	3	3	1	10	6	8
89	0	0	0	3	-1	0	10	7	10
89.1667	3	-1	2	3	1	2	8	5	7
89.3333	2	2	2	3	3	1	8	8	9
89.5	1	2	1	3	3	2	12	6	8
89.6667	1	0	1	2	0	2	10	9	6
89.8333	3	2	1	4	2	2	10	6	6
90	0	0	2	3	1	1	10	7	6
90.1667	2	1	2	3	1	2	9	6	6
90.3333	1	1	2	3	2	3	11	6	8
90.5	1	1	0	3	2	3	9	6	5
90.6667	1	2	0	2	3	2	9	9	7
90.8333	3	2	3	3	3	1	10	6	9
91	3	1	2	4	3	3	9	7	6
91.1667	1	0	1	2	2	1	9	7	7
91.3333	0	0	2	2	1	3	10	7	7
91.5	1	1	4	4	2	2	9	6	4
91.6667	1	1	1	2	3	2	11	5	7
91.8333	2	3	0	3	2	2	9	6	8
92	0	0	1	2	1	3	10	10	7
92.1667	3	2	1	4	3	2	9	7	6
92.3333	2	2	2	2	3	2	10	6	5
92.5	0	1	3	2	2	2	10	7	8
92.6667	2	0	0	3	1	0	10	7	7
92.8333	1	2	1	2	3	1	9	8	8
93	2	1	1	2	1	2	7	8	6
93.1667	3	2	3	3	1	3	12	6	6
93.3333	2	1	1	3	3	1	11	6	6
93.5	2	1	3	3	1	3	11	8	7
93.6667	3	1	3	4	3	3	11	9	8
93.8333	1	1	2	2	1	3	9	7	7
94	1	3	1	4	2	1	12	6	7
94.1667	1	3	2	2	2	2	10	7	7
94.3333	1	2	0	2	2	1	9	6	7
94.5	2	1	3	3	4	3	9	6	8
94.6667	2	2	1	3	4	1	9	6	7
94.8333	1	0	0	3	0	0	10	6	8
95	0	1	2	2	2	2	10	6	6
95.1667	2	1	2	3	1	2	9	7	7
95.3333	2	0	2	3	2	2	11	6	6
95.5	1	2	2	3	1	2	9	7	7
95.6667	2	3	1	1	2	2	10	8	7
95.8333	0	2	3	1	3	2	11	6	6
96	2	1	2	2	3	3	9	7	8

## Sheet: Supplementary_fig1b
Time Elapsed (hours)	tau S320F			tau WT
0	12	11	7	2	1	0
0.166667	3	0	5	-1	0	1
0.333333	6	4	-1	1	1	-1
0.5	10	7	5	0	1	2
0.666667	15	9	6	0	0	-1
0.833333	12	12	10	-2	-1	-1
1	21	20	15	-1	-1	0
1.16667	25	22	15	0	0	0
1.33333	26	20	20	-1	1	-1
1.5	23	25	20	-3	0	1
1.66667	29	30	26	1	1	1
1.83333	35	27	22	-1	1	-2
2	37	33	28	-1	-1	3
2.16667	34	35	28	-2	0	1
2.33333	37	35	26	-1	-1	-1
2.5	43	35	32	1	0	1
2.66667	43	40	28	0	0	0
2.83333	44	38	29	0	-1	0
3	41	41	33	-1	2	1
3.16667	44	41	30	0	1	0
3.33333	44	44	37	0	1	0
3.5	44	39	33	1	-1	-1
3.66667	46	35	30	-1	0	-1
3.83333	46	42	31	1	0	0
4	49	39	31	0	-1	0
4.16667	44	45	33	0	-1	0
4.33333	47	40	33	0	0	-1
4.5	43	45	36	-2	0	0
4.66667	47	44	34	0	-2	0
4.83333	49	49	35	-1	1	0
5	52	47	32	0	1	-1
5.16667	50	44	37	0	-1	2
5.33333	49	49	34	-3	0	-1
5.5	49	40	40	0	1	2
5.66667	52	50	39	-3	0	0
5.83333	54	47	38	-1	-1	-1
6	56	49	43	0	-1	2
6.16667	58	49	39	-1	2	-1
6.33333	59	55	44	-1	0	-1
6.5	55	52	43	-1	0	-1
6.66667	59	54	44	-3	1	1
6.83333	60	56	42	0	-1	0
7	61	58	44	1	0	-1
7.16667	59	59	44	-1	0	3
7.33333	66	54	41	1	0	-1
7.5	62	55	46	0	-2	-1
7.66667	60	54	52	-1	0	1
7.83333	63	57	48	-1	-2	0
8	61	60	49	-2	1	0
8.16667	65	64	49	-1	0	-2
8.33333	64	61	48	0	1	0
8.5	69	63	52	-1	-2	0
8.66667	72	65	52	-1	1	-1
8.83333	72	65	51	-1	0	1
9	69	63	54	0	0	1
9.16667	70	70	55	-1	0	0
9.33333	69	71	60	0	0	1
9.5	71	68	62	-2	1	2
9.66667	71	72	54	0	-1	0
9.83333	79	71	58	0	1	1
10	76	68	58	1	0	2
10.1667	79	76	58	-1	2	0
10.3333	76	75	61	-2	2	0
10.5	79	76	62	-1	-1	1
10.6667	78	72	61	0	0	1
10.8333	78	76	62	-2	0	0
11	80	75	65	-2	0	1
11.1667	76	74	58	0	0	2
11.3333	82	73	64	1	-1	0
11.5	79	76	60	-1	0	0
11.6667	79	77	58	-1	1	-1
11.8333	81	77	63	0	0	2
12	83	77	61	2	0	1
12.1667	84	79	60	1	0	1
12.3333	83	76	62	0	-1	1
12.5	79	76	68	-2	-1	0
12.6667	82	79	64	-2	-1	-1
12.8333	83	80	63	-1	0	2
13	88	79	60	-1	0	0
13.1667	86	80	62	0	1	-1
13.3333	86	83	70	-1	0	2
13.5	84	85	67	-1	0	-1
13.6667	87	76	66	-1	1	-1
13.8333	87	84	68	-3	-1	0
14	91	84	72	-1	0	1
14.1667	88	80	70	-1	-1	2
14.3333	93	80	70	-1	0	-1
14.5	92	83	73	0	-3	0
14.6667	88	87	73	2	2	0
14.8333	91	86	76	1	-1	1
15	91	88	74	-2	-2	0
15.1667	99	89	72	0	2	0
15.3333	97	93	76	-1	0	0
15.5	99	91	76	0	-1	1
15.6667	102	94	75	-1	2	1
15.8333	97	95	77	0	1	2
16	100	94	75	-1	0	1
16.1667	99	94	80	0	1	-1
16.3333	99	97	83	1	-2	1
16.5	102	97	82	0	-1	1
16.6667	103	96	77	-1	0	0
16.8333	99	95	81	-1	0	1
17	99	93	84	-1	0	0
17.1667	93	96	78	0	-1	1
17.3333	99	90	80	-1	-1	0
17.5	101	94	81	-1	0	1
17.6667	98	95	76	0	0	-1
17.8333	102	93	79	0	0	1
18	99	98	75	0	1	0
18.1667	99	95	80	1	0	1
18.3333	96	96	75	1	-1	1
18.5	96	96	75	-1	0	0
18.6667	102	94	77	0	-1	2
18.8333	103	96	81	-1	2	-1
19	102	97	82	0	-1	2
19.1667	101	96	76	-1	0	-1
19.3333	104	98	82	0	1	-1
19.5	103	96	81	-1	-1	1
19.6667	103	102	80	0	-1	1
19.8333	100	97	82	1	0	0
20	103	96	82	1	-1	-1
20.1667	107	96	85	-1	-1	0
20.3333	108	102	82	0	0	0
20.5	102	98	85	1	1	1
20.6667	111	101	82	0	0	0
20.8333	112	98	83	0	2	0
21	105	100	81	-1	0	1
21.1667	107	99	88	-1	0	1
21.3333	113	101	86	1	-1	0
21.5	108	105	84	1	-1	0
21.6667	107	107	89	-1	0	0
21.8333	110	107	83	0	0	1
22	108	109	85	1	0	0
22.1667	113	108	84	0	0	2
22.3333	111	106	87	0	1	-1
22.5	111	101	92	0	1	1
22.6667	108	98	87	0	-1	2
22.8333	112	102	88	0	0	1
23	112	104	84	-1	-1	0
23.1667	110	106	82	0	1	0
23.3333	114	105	92	0	1	1
23.5	116	109	91	1	-1	1
23.6667	113	113	90	-1	1	0
23.8333	113	113	90	-2	-1	-1
24	118	114	90	0	-1	-1
24.1667	114	110	89	2	-1	0
24.3333	119	117	94	0	1	1
24.5	113	114	90	-1	0	1
24.6667	119	114	90	-1	1	-1
24.8333	116	117	96	0	0	0
25	117	111	96	-1	0	0
25.1667	114	115	93	1	-1	1
25.3333	120	112	97	-1	0	1
25.5	114	117	99	-1	0	0
25.6667	120	114	99	-1	-1	0
25.8333	120	113	100	0	1	2
26	121	120	93	0	2	0
26.1667	122	124	99	0	-1	1
26.3333	118	118	93	-1	-1	0
26.5	120	122	100	1	0	1
26.6667	122	110	99	-1	0	1
26.8333	120	119	93	0	0	0
27	123	112	99	1	0	1
27.1667	120	112	96	1	-1	1
27.3333	118	117	91	0	0	1
27.5	114	115	94	0	-1	0
27.6667	117	120	98	-1	-1	0
27.8333	122	117	100	0	0	0
28	118	120	97	0	0	0
28.1667	118	120	99	1	1	1
28.3333	122	122	100	0	0	2
28.5	118	118	97	0	-1	1
28.6667	125	124	101	0	-1	0
28.8333	125	122	100	-1	-2	0
29	122	120	98	1	0	0
29.1667	132	116	103	0	2	0
29.3333	123	122	103	-2	0	1
29.5	125	122	102	-1	1	2
29.6667	124	125	97	0	0	-1
29.8333	128	119	98	1	1	2
30	128	117	99	1	-1	1
30.1667	129	129	105	0	1	1
30.3333	127	127	94	-1	-1	2
30.5	127	120	102	-1	-1	1
30.6667	133	123	108	-1	2	1
30.8333	128	127	104	0	0	-1
31	125	122	102	-1	0	1
31.1667	132	126	108	-1	0	0
31.3333	131	129	108	-1	0	1
31.5	135	126	101	0	0	-1
31.6667	135	126	105	0	-1	0
31.8333	133	131	102	0	2	0
32	136	123	106	0	0	1
32.1667	132	133	105	-1	0	0
32.3333	133	129	109	-1	1	0
32.5	141	129	111	0	0	0
32.6667	134	135	109	0	0	1
32.8333	141	131	111	-1	2	0
33	142	134	112	0	0	2
33.1667	135	136	107	0	1	0
33.3333	139	140	108	0	0	1
33.5	142	131	118	-2	-1	1
33.6667	139	139	119	0	2	1
33.8333	140	138	110	2	0	0
34	144	141	120	1	0	-2
34.1667	145	143	114	1	1	1
34.3333	143	141	117	-2	0	1
34.5	142	142	119	-1	1	0
34.6667	146	133	110	1	0	1
34.8333	139	137	115	1	0	1
35	143	138	110	1	-2	1
35.1667	146	139	118	0	1	-1
35.3333	137	138	116	-1	0	2
35.5	136	132	114	-2	0	2
35.6667	140	138	110	-1	-1	2
35.8333	135	135	114	0	-1	3
36	139	129	111	0	-1	0
36.1667	136	132	115	2	2	0
36.3333	138	132	107	-1	1	0
36.5	136	140	109	0	-1	0
36.6667	136	132	115	0	2	2
36.8333	139	130	107	0	1	1
37	136	136	109	-1	0	0
37.1667	135	130	109	-2	1	1
37.3333	132	128	107	-2	1	1
37.5	131	132	108	-1	1	2
37.6667	139	135	112	0	-1	2
37.8333	131	131	113	-2	-1	1
38	134	128	111	-1	-1	0
38.1667	137	135	108	0	2	0
38.3333	137	130	110	-1	0	1
38.5	141	133	109	0	1	0
38.6667	135	135	115	-1	0	1
38.8333	141	137	114	-1	2	0
39	134	131	110	1	2	0
39.1667	137	139	113	0	0	1
39.3333	136	137	112	0	0	0
39.5	136	128	109	-2	0	1
39.6667	134	134	109	-1	1	1
39.8333	140	133	108	2	-1	1
40	140	130	106	2	2	0
40.1667	143	131	107	1	1	0
40.3333	136	135	109	0	-1	0
40.5	135	133	115	-2	1	1
40.6667	133	135	110	-1	1	1
40.8333	142	133	113	1	0	0
41	139	144	112	0	-1	2
41.1667	143	140	113	-1	0	1
41.3333	141	137	116	1	2	2
41.5	139	137	111	0	0	1
41.6667	137	135	115	0	3	-1
41.8333	139	139	112	-1	-1	-1
42	142	130	121	1	-1	2
42.1667	133	135	112	1	0	-1
42.3333	138	138	114	0	0	1
42.5	140	135	112	0	-1	1
42.6667	140	130	111	0	1	2
42.8333	141	139	114	2	1	1
43	139	137	111	1	0	1
43.1667	142	138	115	-2	0	1
43.3333	139	136	114	-1	0	2
43.5	138	139	114	0	0	1
43.6667	147	136	114	0	1	3
43.8333	141	141	118	0	0	1
44	139	138	119	-1	0	0
44.1667	144	139	125	0	-1	0
44.3333	139	137	118	-1	2	1
44.5	137	133	116	0	-2	0
44.6667	137	137	114	-1	1	0
44.8333	145	138	113	1	1	2
45	144	137	112	0	0	0
45.1667	144	139	110	0	0	2
45.3333	141	144	120	0	1	-1
45.5	144	140	114	1	0	1
45.6667	143	141	117	2	0	1
45.8333	141	138	117	-1	0	0
46	144	144	116	-1	1	1
46.1667	147	144	116	0	1	-1
46.3333	145	146	116	-1	0	1
46.5	148	139	116	1	-1	0
46.6667	140	146	119	-1	0	0
46.8333	149	141	116	0	-1	1
47	147	143	114	0	-1	-2
47.1667	153	143	115	0	0	1
47.3333	148	139	121	0	0	1
47.5	143	143	115	-3	1	0
47.6667	148	145	114	0	1	3
47.8333	149	140	117	0	-2	1
48	145	134	123	-1	1	1
48.1667	143	147	116	1	2	0
48.3333	144	140	120	1	1	1
48.5	150	135	115	1	-1	-1
48.6667	148	145	119	0	1	1
48.8333	146	142	117	0	1	1
49	150	153	125	0	0	0
49.1667	150	145	110	-1	-1	0
49.3333	147	143	118	1	1	1
49.5	149	146	119	2	-2	1
49.6667	151	146	121	1	0	2
49.8333	147	151	124	0	1	1
50	148	147	121	0	1	1
50.1667	149	142	121	1	0	1
50.3333	149	145	122	0	0	2
50.5	143	147	124	0	-1	1
50.6667	148	148	124	1	-1	0
50.8333	146	144	126	-1	-1	1
51	152	149	129	1	1	3
51.1667	151	150	118	0	0	2
51.3333	150	154	127	0	2	1
51.5	156	147	123	-1	0	0
51.6667	150	149	127	-1	1	0
51.8333	151	147	125	0	1	1
52	150	150	124	1	1	2
52.1667	150	153	127	2	0	2
52.3333	156	152	125	0	0	0
52.5	158	154	121	1	-1	1
52.6667	149	149	124	0	-1	1
52.8333	149	151	119	0	0	0
53	160	151	127	-1	0	0
53.1667	152	153	129	0	0	1
53.3333	156	155	123	0	0	1
53.5	155	149	122	0	2	0
53.6667	153	150	128	1	-2	1
53.8333	155	159	125	-1	0	2
54	153	154	122	1	1	2
54.1667	150	152	123	1	0	0
54.3333	150	153	123	0	-1	0
54.5	158	149	121	0	-1	1
54.6667	159	152	122	1	0	1
54.8333	150	156	130	2	0	1
55	149	156	123	0	-1	1
55.1667	157	149	124	1	-1	3
55.3333	147	153	123	-1	2	3
55.5	154	153	123	1	0	-1
55.6667	153	156	123	1	1	0
55.8333	149	153	121	0	0	0
56	162	149	123	2	0	-1
56.1667	154	157	125	1	0	1
56.3333	153	156	128	1	-1	1
56.5	149	151	124	1	-1	0
56.6667	154	153	128	-1	0	1
56.8333	157	155	122	2	0	2
57	154	155	122	1	0	1
57.1667	154	152	123	0	0	0
57.3333	152	152	129	1	-3	1
57.5	149	153	124	0	0	3
57.6667	153	150	126	2	1	-1
57.8333	154	153	133	1	0	1
58	155	158	130	2	0	0
58.1667	153	153	123	0	0	2
58.3333	158	158	127	-1	1	1
58.5	157	150	128	-1	-1	2
58.6667	152	152	122	2	0	2
58.8333	159	152	129	-2	0	1
59	155	152	132	0	-1	2
59.1667	154	159	124	0	2	2
59.3333	155	154	126	0	1	1
59.5	158	155	125	0	0	2
59.6667	158	149	132	0	0	1
59.8333	148	151	129	0	1	1
60	158	158	129	0	-1	0
60.1667	152	153	133	0	0	0
60.3333	154	151	130	-1	1	1
60.5	155	153	127	1	0	1
60.6667	155	149	133	0	0	1
60.8333	158	157	123	1	1	2
61	152	154	127	0	0	0
61.1667	148	155	128	-1	-1	0
61.3333	158	150	127	1	1	1
61.5	149	159	124	0	1	2
61.6667	156	150	128	2	1	0
61.8333	152	158	127	1	-1	-1
62	155	152	127	0	0	1
62.1667	155	153	123	2	0	-1
62.3333	154	153	129	0	-2	0
62.5	156	153	121	1	0	1
62.6667	156	159	127	1	-1	1
62.8333	154	150	126	-1	0	0
63	152	161	126	-1	0	0
63.1667	157	160	131	0	1	1
63.3333	156	158	131	0	1	1
63.5	158	157	125	2	0	2
63.6667	152	162	132	1	0	3
63.8333	155	150	124	0	-1	0
64	154	153	130	1	1	1
64.1667	152	148	129	0	0	0
64.3333	156	157	131	2	2	2
64.5	154	160	129	1	0	0
64.6667	158	156	126	1	0	1
64.8333	158	153	127	-1	-1	1
65	155	159	130	1	0	2
65.1667	159	157	132	-1	2	0
65.3333	154	166	129	0	1	0
65.5	158	157	133	2	-1	0
65.6667	154	154	133	-1	0	2
65.8333	155	159	129	0	0	2
66	154	155	133	1	1	2
66.1667	163	162	129	0	1	1
66.3333	157	153	134	1	0	1
66.5	158	158	129	1	0	0
66.6667	155	155	124	1	-1	2
66.8333	154	158	132	1	-1	1
67	154	157	133	0	-1	-1
67.1667	167	156	131	2	1	2
67.3333	152	161	127	0	-1	0
67.5	157	157	135	1	0	1
67.6667	158	156	130	0	1	0
67.8333	156	154	129	1	1	0
68	164	158	135	0	1	1
68.1667	160	166	131	1	0	0
68.3333	162	164	131	2	0	3
68.5	164	157	129	1	1	1
68.6667	157	161	138	0	-2	2
68.8333	157	165	128	-1	-1	1
69	155	157	129	0	1	0
69.1667	161	162	132	2	-1	0
69.3333	157	163	135	0	2	0
69.5	159	155	132	0	-1	3
69.6667	162	155	129	0	2	1
69.8333	158	159	130	-1	1	0
70	159	163	131	-1	1	0
70.1667	154	154	134	1	0	1
70.3333	159	164	134	2	0	1
70.5	162	165	130	2	1	-2
70.6667	159	157	128	-2	-1	0
70.8333	158	159	126	1	1	-1
71	155	162	131	1	2	1
71.1667	161	161	133	1	0	1
71.3333	160	158	131	-1	-2	1
71.5	159	164	136	-1	1	1
71.6667	157	160	132	-1	1	2
71.8333	159	157	135	0	0	2
72	156	159	131	0	-1	1

## Sheet: Supplementary_fig1c
Time Elapsed (hours)	4R S320F 50uM			3R S320F 50uM			4R S320F 75uM			3R S320F 75uM			4R S320F 100uM			3R S320F 120uM
0	18	14	13	5	3	5	16	19	18	-1	1	0	29	28	28	16	7	9
0.166667	14	11	8	7	2	0	18	16	9	1	1	-4	32	33	29	11	7	7
0.333333	15	13	8	7	4	0	17	17	12	2	1	-1	42	41	38	10	5	5
0.5	13	11	10	7	3	1	20	17	14	2	0	-1	51	47	46	9	6	5
0.666667	14	14	12	5	4	3	20	19	17	3	0	0	57	56	55	16	7	5
0.833333	15	14	16	6	5	4	20	21	21	3	1	1	63	61	64	20	5	6
1	17	15	16	5	1	3	24	21	21	2	-1	-1	71	65	70	22	6	6
1.16667	20	17	13	6	0	3	27	26	22	3	2	1	76	76	75	24	9	7
1.33333	18	20	14	5	4	3	30	30	24	1	3	-1	82	79	78	22	9	9
1.5	21	19	15	3	0	1	30	29	25	1	1	-1	87	81	83	23	10	8
1.66667	20	20	18	6	3	2	34	35	26	3	4	-3	90	91	84	23	12	9
1.83333	27	22	17	7	2	0	36	36	29	2	0	0	98	88	88	25	13	7
2	25	22	22	3	1	2	41	40	32	5	1	0	93	90	91	25	11	7
2.16667	27	25	20	3	4	2	43	40	35	4	1	2	103	93	98	27	15	7
2.33333	30	24	23	5	2	3	48	44	38	2	0	-1	104	97	93	24	13	9
2.5	31	24	27	4	2	6	48	47	43	3	1	3	101	96	100	27	14	8
2.66667	31	30	26	6	3	4	51	51	43	5	1	3	109	103	103	27	14	10
2.83333	30	29	25	5	1	0	51	51	41	3	3	-1	111	104	105	25	11	9
3	30	31	30	4	2	4	55	51	47	1	3	4	111	111	114	26	12	11
3.16667	30	31	31	1	6	3	54	54	51	1	1	2	112	108	108	26	13	9
3.33333	34	31	31	4	3	6	60	58	54	1	1	2	119	108	116	24	14	9
3.5	39	31	32	7	5	3	61	57	53	4	1	2	118	104	116	26	15	11
3.66667	35	35	35	4	2	3	65	61	56	2	1	-1	116	113	115	25	14	9
3.83333	41	36	36	5	1	4	69	63	61	2	-1	3	117	115	126	27	12	9
4	42	38	39	4	2	5	67	63	61	1	2	3	119	113	119	24	15	10
4.16667	41	39	39	6	2	5	69	66	62	1	1	4	122	117	123	25	15	11
4.33333	43	39	36	7	1	5	74	68	61	2	-2	2	124	119	120	27	13	9
4.5	44	45	38	4	4	3	72	73	62	2	4	1	122	121	121	26	13	9
4.66667	47	42	41	1	1	3	77	68	71	-1	3	3	124	122	124	25	15	9
4.83333	46	41	41	2	3	3	76	75	67	2	1	3	127	117	127	26	13	11
5	43	48	41	4	5	3	75	80	68	1	2	4	130	124	130	28	13	10
5.16667	51	48	44	5	1	3	76	79	71	3	2	1	131	130	126	25	15	12
5.33333	51	46	41	4	4	4	77	80	72	4	2	3	125	128	130	26	14	10
5.5	49	49	41	3	4	3	82	86	74	2	2	4	134	129	128	27	12	10
5.66667	51	53	47	1	5	5	82	84	77	-1	1	4	129	133	136	25	14	9
5.83333	50	54	48	3	4	4	84	80	77	0	1	3	128	131	132	24	14	11
6	55	52	51	3	3	3	88	83	81	1	1	2	130	133	133	29	15	11
6.16667	54	53	51	4	4	3	90	88	79	2	4	2	135	135	136	25	12	12
6.33333	56	54	51	4	3	3	89	84	83	2	-1	2	131	128	139	26	15	10
6.5	54	56	50	2	2	4	93	86	88	0	1	4	131	131	139	28	15	11
6.66667	58	52	52	7	1	5	95	90	86	3	1	3	138	130	137	26	14	14
6.83333	54	59	53	3	3	4	92	93	88	1	2	2	130	137	142	28	16	11
7	58	58	56	3	5	4	93	94	88	0	3	2	130	135	138	26	13	10
7.16667	62	59	57	2	2	3	95	91	90	1	-1	3	134	139	139	25	14	11
7.33333	61	63	59	3	5	4	101	96	95	3	3	3	136	134	143	26	14	13
7.5	63	60	55	5	4	3	98	92	90	3	2	1	142	136	138	27	16	10
7.66667	64	67	64	1	3	4	102	101	91	3	1	4	131	137	140	27	13	11
7.83333	65	67	55	4	4	2	97	97	89	1	4	0	133	139	139	26	17	12
8	67	66	61	6	2	3	95	97	99	1	1	3	138	134	144	26	14	11
8.16667	69	68	62	2	0	4	96	102	97	1	-1	2	137	134	146	26	14	10
8.33333	70	73	64	6	4	6	105	99	96	2	3	2	132	139	142	25	14	13
8.5	67	69	66	5	5	3	101	104	99	4	2	1	137	144	147	27	15	10
8.66667	74	71	66	6	1	6	107	101	97	2	-2	2	140	135	144	27	14	12
8.83333	71	75	69	3	2	3	102	104	97	1	1	3	135	133	145	26	14	9
9	73	77	70	3	2	3	105	104	99	3	2	-1	140	133	145	28	15	12
9.16667	81	75	69	5	5	3	104	103	100	4	4	4	136	137	147	25	15	9
9.33333	76	75	73	5	4	0	101	104	100	3	3	1	139	138	138	27	16	10
9.5	76	77	73	1	3	2	108	110	102	2	2	2	137	141	143	27	13	12
9.66667	79	78	72	3	1	4	103	109	100	3	2	1	131	137	149	27	15	9
9.83333	80	83	77	4	5	4	102	106	99	3	3	2	133	136	142	27	15	11
10	84	80	75	2	2	3	104	108	105	4	3	2	137	135	144	29	14	11
10.1667	83	82	75	4	3	4	108	110	108	3	3	3	135	133	143	28	15	10
10.3333	83	83	81	5	4	4	105	107	104	3	4	2	131	136	142	28	14	10
10.5	85	84	75	3	3	1	100	107	103	1	2	1	132	136	146	27	18	10
10.6667	85	85	78	6	4	6	101	110	105	5	4	3	136	131	141	27	13	9
10.8333	88	82	80	5	2	0	104	108	103	2	4	3	134	139	142	28	12	12
11	87	89	79	4	2	3	98	106	108	2	3	2	132	139	139	26	13	13
11.1667	87	85	85	4	3	4	102	108	105	1	2	4	132	136	145	26	15	11
11.3333	90	84	83	5	2	7	108	103	104	4	1	4	132	134	144	26	16	11
11.5	94	89	82	5	4	2	109	107	104	4	0	3	130	137	138	27	15	10
11.6667	95	89	89	5	2	5	102	109	103	4	2	3	131	136	149	25	14	11
11.8333	92	92	86	4	3	3	103	106	103	4	4	1	133	137	138	27	15	11
12	89	88	87	4	2	5	103	101	106	1	0	3	128	132	139	27	15	10
12.1667	90	91	83	5	4	2	100	103	101	2	1	0	132	134	136	25	14	10
12.3333	98	91	90	4	3	3	100	103	103	4	3	4	131	133	141	24	13	10
12.5	93	90	85	2	4	4	96	109	106	1	2	2	128	142	143	26	14	12
12.6667	95	92	90	4	1	3	98	103	106	4	1	1	132	134	137	28	16	9
12.8333	94	92	88	3	5	3	100	105	100	0	3	0	126	133	138	25	14	11
13	92	91	87	5	3	3	99	101	99	4	1	4	126	128	137	28	16	11
13.1667	93	91	92	7	2	4	105	104	103	4	1	3	128	131	139	24	16	13
13.3333	96	93	92	3	1	7	98	106	105	1	2	5	129	129	137	28	16	9
13.5	97	97	89	0	3	5	96	102	104	-1	2	5	120	129	142	26	16	11
13.6667	96	94	95	3	4	4	101	107	101	3	2	2	129	132	136	25	15	12
13.8333	95	91	94	3	2	4	90	100	103	3	3	4	128	132	138	24	15	12
14	98	98	96	4	6	3	96	104	104	3	4	4	128	129	142	26	16	11
14.1667	95	95	93	3	3	3	97	99	100	2	2	3	128	130	139	24	15	13
14.3333	94	97	94	4	1	5	97	101	104	3	3	2	128	132	132	26	14	12
14.5	103	97	93	5	4	3	90	106	95	3	1	2	126	127	138	26	14	12
14.6667	93	100	93	4	3	4	93	101	101	2	2	1	126	125	135	28	18	11
14.8333	100	91	92	6	3	7	105	101	104	4	1	3	123	124	140	28	17	12
15	100	93	91	4	5	5	99	101	100	3	4	3	124	132	129	27	15	10
15.1667	103	96	99	2	3	4	91	108	102	2	3	3	125	129	135	25	16	11
15.3333	99	98	100	4	4	5	97	97	104	4	3	4	127	125	137	27	16	11
15.5	96	100	99	3	4	3	93	97	98	3	5	5	119	134	138	26	17	10
15.6667	101	93	93	5	1	3	91	99	95	2	0	2	122	129	136	25	16	11
15.8333	90	96	92	3	3	2	91	91	99	3	3	2	124	130	136	29	16	10
16	97	99	96	5	4	3	97	93	96	3	4	2	122	128	131	25	17	11
16.1667	99	97	93	5	3	4	95	98	97	3	0	3	116	127	135	26	16	13
16.3333	92	98	97	1	4	6	91	96	100	3	3	3	118	128	135	26	15	9
16.5	94	101	98	4	1	5	94	96	94	3	3	4	115	127	134	28	16	14
16.6667	97	103	92	4	5	3	90	97	100	3	4	3	119	125	138	27	14	12
16.8333	96	91	96	2	4	7	87	96	99	1	3	3	114	132	134	25	15	13
17	95	107	98	4	5	5	89	92	97	1	1	2	119	128	136	27	13	13
17.1667	95	97	99	2	1	5	94	92	91	4	4	3	124	130	135	27	15	11
17.3333	99	95	98	4	2	3	86	90	95	3	1	2	121	123	137	27	17	9
17.5	96	97	98	3	4	7	89	97	96	2	3	6	120	125	135	25	14	12
17.6667	98	92	93	4	2	2	87	89	94	2	1	1	122	124	133	27	19	13
17.8333	96	97	99	2	2	5	84	88	93	0	2	4	116	128	133	27	18	11
18	94	95	99	1	0	5	88	91	92	4	1	3	115	128	131	25	18	11
18.1667	95	99	97	3	4	3	90	97	88	2	3	3	116	123	128	25	18	12
18.3333	91	92	97	5	1	4	93	89	93	5	0	1	124	120	133	28	16	12
18.5	95	94	97	5	3	2	91	93	92	3	3	2	119	127	133	26	16	12
18.6667	92	95	93	3	3	6	86	92	93	5	4	2	114	121	136	26	17	10
18.8333	91	92	92	3	2	4	87	93	88	1	2	2	114	123	137	25	15	12
19	98	93	93	4	3	8	83	93	93	2	3	7	115	125	133	27	15	11
19.1667	93	92	94	3	3	3	86	93	89	1	3	3	115	125	129	27	15	11
19.3333	93	91	92	6	2	4	89	84	90	5	3	5	116	125	135	26	15	11
19.5	94	91	92	5	-1	6	84	88	92	3	1	2	114	121	134	26	17	12
19.6667	89	92	94	4	2	6	87	87	89	3	3	3	118	125	133	26	19	10
19.8333	94	92	95	6	2	4	88	88	92	5	4	4	115	127	135	26	18	10
20	94	90	91	3	2	5	82	88	91	3	1	3	113	126	133	26	17	11
20.1667	91	92	97	2	2	3	82	85	87	3	0	2	118	126	132	26	16	12
20.3333	89	94	92	3	4	3	87	86	88	3	3	3	117	127	130	27	13	14
20.5	92	98	95	7	3	5	86	88	85	2	3	5	114	129	134	26	16	11
20.6667	88	91	91	3	4	4	84	86	87	2	4	3	112	125	133	27	17	12
20.8333	95	93	89	5	4	6	85	85	90	6	5	3	115	123	134	27	15	12
21	90	97	90	2	3	5	85	84	85	3	2	3	117	124	133	24	15	10
21.1667	94	88	92	2	3	6	86	88	91	1	2	3	109	130	136	25	18	13
21.3333	92	93	93	5	3	5	82	84	86	3	4	1	114	124	132	27	18	13
21.5	94	88	94	3	5	2	86	88	84	3	3	3	117	121	133	26	17	11
21.6667	95	89	93	4	3	5	86	87	81	3	0	4	113	128	137	24	16	11
21.8333	91	86	91	6	2	5	82	84	87	4	3	5	120	122	131	25	17	12
22	90	88	96	5	4	8	84	89	83	2	5	5	119	126	134	27	17	12
22.1667	93	87	92	6	2	3	93	85	87	6	3	2	116	125	136	28	16	11
22.3333	95	88	86	5	3	4	87	88	83	5	2	2	116	126	131	26	15	9
22.5	90	92	94	7	6	6	86	87	87	3	6	3	117	128	131	25	17	9
22.6667	94	90	89	3	6	3	84	90	84	0	4	2	114	126	131	25	17	11
22.8333	91	86	92	5	3	5	84	85	83	4	3	5	118	129	135	23	16	11
23	89	86	95	4	3	5	84	82	85	3	3	4	117	125	134	24	15	10
23.1667	93	90	88	4	3	7	79	83	84	4	3	4	118	125	132	25	15	12
23.3333	89	90	92	3	3	4	84	84	81	5	2	6	117	125	133	24	15	12
23.5	90	87	89	4	4	5	79	85	84	2	2	5	113	127	135	27	17	13
23.6667	84	84	86	2	3	3	81	81	79	2	3	2	114	126	132	27	17	10
23.8333	84	87	91	5	3	5	84	85	81	3	3	3	113	126	134	26	14	9
24	91	91	89	4	6	3	83	79	83	4	4	5	119	125	127	24	18	10
24.1667	89	85	86	5	3	6	79	82	82	1	1	2	114	122	129	25	13	10
24.3333	87	85	89	3	6	5	88	91	81	0	5	2	113	124	133	25	17	9
24.5	84	86	89	4	5	6	82	83	83	3	3	2	116	128	130	25	16	11
24.6667	84	85	91	6	4	4	81	82	82	2	1	5	116	123	134	26	16	10
24.8333	86	91	88	4	4	2	81	84	79	3	5	2	115	128	133	28	13	12
25	89	86	88	6	4	8	87	84	80	5	3	4	118	127	126	26	15	10
25.1667	85	87	89	5	4	8	80	79	83	3	1	6	113	124	130	26	16	9
25.3333	84	81	86	5	4	4	85	82	84	5	2	4	116	123	135	25	17	10
25.5	85	86	90	4	2	5	80	77	81	4	2	3	116	125	126	25	14	12
25.6667	84	85	85	5	5	6	83	81	83	4	4	3	116	123	130	24	17	10
25.8333	85	82	82	5	4	5	79	78	81	2	2	3	113	129	136	26	17	13
26	86	85	86	2	4	6	78	80	79	0	5	3	113	130	130	24	17	13
26.1667	87	85	82	4	1	4	83	81	82	2	2	3	110	128	129	25	14	11
26.3333	84	86	88	3	3	4	78	82	81	2	3	2	115	126	131	24	16	11
26.5	86	88	88	5	5	6	84	80	78	4	5	4	117	134	134	25	17	11
26.6667	87	80	89	6	4	4	81	81	83	6	1	3	114	125	132	27	17	13
26.8333	85	85	86	6	4	3	80	77	77	3	4	3	116	133	130	25	14	11
27	79	83	87	5	2	7	84	78	80	4	2	5	113	127	134	22	17	12
27.1667	83	88	84	3	4	4	77	81	80	4	2	4	116	125	136	26	15	13
27.3333	83	81	87	5	5	5	79	81	80	2	1	1	112	130	132	25	15	11
27.5	80	82	88	4	6	6	80	81	80	2	6	4	113	127	132	25	14	12
27.6667	83	82	83	4	3	4	82	82	82	2	2	4	115	128	131	25	17	12
27.8333	82	83	84	2	8	5	80	82	76	3	5	5	110	130	131	25	16	14
28	82	79	81	5	2	5	82	76	80	3	1	3	117	122	134	26	16	10
28.1667	81	83	84	5	3	3	79	79	78	4	1	2	114	131	135	26	18	11
28.3333	78	83	80	2	3	3	81	75	79	0	2	3	114	129	134	24	16	11
28.5	81	81	86	4	2	5	79	78	81	4	2	5	115	125	133	28	18	11
28.6667	79	81	81	4	3	6	82	80	81	3	2	4	112	129	134	28	17	12
28.8333	85	80	82	4	4	3	80	80	84	4	3	4	116	129	135	26	15	12
29	81	86	81	2	4	2	77	78	77	2	3	2	115	131	131	26	17	13
29.1667	81	85	82	4	7	5	78	83	78	2	4	1	113	128	132	24	16	11
29.3333	84	76	84	5	1	6	81	74	78	4	1	4	118	130	136	26	15	11
29.5	76	87	84	1	4	4	77	77	77	0	3	2	111	130	131	26	18	14
29.6667	77	82	84	2	3	5	81	72	79	2	2	6	113	133	135	28	16	11
29.8333	75	79	80	2	4	7	80	77	76	2	3	5	115	131	134	27	16	12
30	77	82	80	3	2	7	80	78	79	1	4	5	114	132	141	24	15	12
30.1667	73	80	82	5	3	6	76	74	73	2	4	2	117	136	135	27	16	12
30.3333	79	81	80	3	5	5	77	78	77	1	3	1	119	130	132	26	15	12
30.5	82	76	82	4	2	7	85	79	80	5	1	4	115	127	130	25	16	13
30.6667	75	77	80	4	3	6	78	75	75	1	3	4	117	132	132	23	16	13
30.8333	80	80	80	3	2	8	80	76	76	3	4	4	113	133	136	25	14	11
31	78	73	77	5	2	7	83	74	80	2	2	7	116	129	137	25	16	12
31.1667	77	78	80	3	3	6	82	74	79	2	3	3	116	135	134	25	16	13
31.3333	78	75	82	6	5	8	80	76	79	5	6	4	115	138	136	28	17	11
31.5	77	76	78	5	5	5	82	79	79	1	2	5	114	127	133	23	17	11
31.6667	76	78	80	2	4	5	81	74	77	2	2	5	114	130	134	23	16	13
31.8333	77	77	80	6	0	5	80	75	78	3	0	5	119	128	138	24	19	11
32	76	78	79	3	4	6	79	78	81	2	2	3	116	129	137	25	15	12
32.1667	78	76	76	5	3	6	83	78	78	4	2	3	115	129	134	26	17	13
32.3333	77	74	80	4	0	3	81	75	79	3	2	3	116	131	138	25	15	14
32.5	76	73	77	7	4	4	81	78	77	4	1	3	118	127	137	25	16	12
32.6667	75	75	77	5	4	3	79	78	78	2	2	2	117	131	132	25	17	12
32.8333	76	70	79	5	5	4	81	75	76	4	4	3	119	130	138	27	15	11
33	73	72	77	5	3	5	80	78	76	2	3	2	117	132	133	27	17	11
33.1667	76	71	79	7	3	4	83	76	80	5	2	3	114	131	137	27	17	12
33.3333	71	73	75	6	4	2	84	72	74	3	4	2	118	129	134	25	18	14
33.5	72	74	77	4	5	5	80	76	77	6	5	3	111	136	134	25	17	12
33.6667	74	76	79	3	4	4	78	77	72	2	1	2	113	129	132	26	15	11
33.8333	76	77	76	6	5	5	81	78	76	3	5	4	117	133	135	25	18	13
34	75	77	80	5	2	6	81	73	76	1	2	5	116	132	135	25	16	10
34.1667	72	71	78	4	2	3	83	75	74	1	3	4	114	131	133	26	15	12
34.3333	73	75	77	6	5	3	78	78	79	4	4	3	113	133	127	25	15	12
34.5	70	72	75	5	3	4	83	77	74	4	3	4	114	133	137	25	15	12
34.6667	71	72	76	2	2	5	81	76	75	2	1	3	121	131	133	25	15	12
34.8333	74	75	76	3	5	4	82	74	79	3	3	4	115	130	135	27	16	11
35	73	72	76	3	4	6	83	79	82	3	2	4	116	135	138	25	17	11
35.1667	73	75	80	6	3	7	79	76	76	3	1	5	119	133	137	24	16	12
35.3333	78	74	75	5	3	4	84	76	74	3	1	5	118	136	136	22	14	15
35.5	72	72	77	3	6	5	83	78	79	2	2	5	118	135	140	26	16	13
35.6667	73	73	76	7	5	4	85	75	74	3	5	3	121	131	130	24	17	10
35.8333	72	72	75	5	3	5	81	73	78	4	1	5	120	129	133	25	17	11
36	77	72	70	5	2	3	77	76	74	1	2	3	121	128	135	24	17	13
36.1667	71	76	75	5	7	5	83	80	77	3	5	4	115	133	135	24	16	12
36.3333	75	76	71	2	4	5	80	77	74	3	3	2	119	130	136	26	15	13
36.5	74	70	77	6	3	6	79	75	76	4	1	4	120	127	137	24	17	12
36.6667	68	71	77	3	3	8	80	75	82	3	2	7	120	131	140	25	18	12
36.8333	74	73	73	2	3	5	83	76	77	1	2	2	117	132	135	26	18	13
37	70	75	73	5	5	5	80	75	74	4	4	4	122	136	134	23	16	14
37.1667	76	73	74	5	3	5	86	75	80	4	4	3	122	135	137	28	14	14
37.3333	67	71	73	5	3	5	80	76	80	1	0	4	121	134	139	25	16	13
37.5	72	73	70	7	3	5	78	76	73	3	2	4	121	135	136	26	15	11
37.6667	70	74	74	4	5	4	77	76	76	2	4	2	120	135	134	24	16	11
37.8333	72	73	79	7	3	3	84	70	75	4	3	3	119	131	135	25	16	12
38	67	70	74	6	4	5	82	74	78	0	2	5	115	134	143	27	17	13
38.1667	65	70	77	4	1	3	83	74	78	2	0	2	119	136	139	25	16	11
38.3333	73	70	75	3	1	4	78	77	73	4	1	3	116	136	136	26	18	13
38.5	71	70	75	7	5	3	79	79	73	3	5	2	119	133	136	27	20	15
38.6667	70	70	72	5	3	4	79	79	75	4	3	4	120	136	135	25	17	11
38.8333	67	73	75	5	4	7	82	78	77	3	2	5	124	134	139	26	18	12
39	72	72	75	5	4	5	83	73	75	3	2	2	123	133	132	25	18	12
39.1667	74	67	72	6	0	5	84	72	76	3	-1	6	123	132	137	27	18	12
39.3333	68	71	73	7	3	8	81	75	76	3	3	2	120	131	136	26	16	12
39.5	67	73	74	5	3	2	78	74	78	1	2	3	124	134	133	28	18	13
39.6667	68	74	71	5	6	6	81	78	77	3	3	2	121	133	137	24	15	12
39.8333	69	71	72	3	4	6	79	78	77	2	3	4	119	134	136	26	16	15
40	72	70	74	6	4	4	85	76	76	4	3	7	126	132	140	25	15	13
40.1667	71	70	69	4	0	6	80	73	75	3	0	3	120	132	140	26	15	15
40.3333	72	74	73	6	2	4	85	74	75	4	3	3	123	131	138	25	16	13
40.5	66	73	70	3	7	4	80	80	76	3	5	3	119	132	133	27	16	12
40.6667	64	67	71	3	3	3	79	76	74	1	2	4	119	136	138	24	18	13
40.8333	71	71	76	6	3	5	78	75	77	3	1	4	122	133	136	23	15	13
41	73	71	70	5	2	7	84	73	75	2	3	5	120	136	138	26	17	12
41.1667	67	70	72	4	3	4	83	73	77	2	3	2	123	130	141	28	17	13
41.3333	67	69	72	4	4	4	82	77	78	5	2	3	123	139	136	27	17	13
41.5	66	67	72	5	3	3	80	76	75	4	1	3	121	132	137	24	18	12
41.6667	66	68	75	5	2	5	85	72	76	2	3	6	119	133	132	23	17	13
41.8333	66	74	68	5	6	3	81	77	73	5	4	2	122	134	134	25	17	15
42	68	66	70	2	2	4	79	76	77	1	0	1	122	133	141	27	18	14
42.1667	67	65	75	4	0	4	81	73	78	1	-1	6	118	131	143	27	13	14
42.3333	69	71	75	3	6	5	78	74	76	2	3	3	123	135	139	24	18	13
42.5	65	68	74	5	3	6	82	77	79	2	3	4	119	133	143	25	17	13
42.6667	70	66	68	6	2	2	83	73	73	3	1	3	125	137	136	25	18	13
42.8333	68	69	70	3	6	3	80	77	75	1	4	3	117	132	136	24	17	12
43	66	72	73	4	3	5	83	75	74	4	4	6	122	132	140	23	17	15
43.1667	72	69	72	5	3	5	85	72	80	3	1	2	125	136	140	28	16	14
43.3333	67	70	70	4	3	4	78	77	77	4	5	4	121	139	138	25	14	13
43.5	68	74	74	3	6	6	82	75	72	2	1	3	126	135	145	26	18	16
43.6667	69	70	71	4	4	3	80	76	76	2	2	3	123	133	134	25	16	13
43.8333	71	68	70	6	1	4	82	77	76	4	1	2	122	138	138	27	16	14
44	66	71	72	2	4	7	82	80	77	3	3	4	122	139	143	28	18	14
44.1667	67	72	70	7	7	5	83	76	80	4	4	4	120	138	138	25	16	13
44.3333	70	65	70	4	3	5	86	71	77	3	4	4	124	142	140	24	17	15
44.5	66	68	70	7	2	4	83	71	75	5	2	4	126	134	141	27	16	12
44.6667	68	70	65	4	3	2	85	73	74	3	4	4	125	140	141	26	16	13
44.8333	61	69	73	5	5	3	84	74	75	3	2	5	128	133	140	27	16	13
45	66	64	70	6	4	4	83	70	75	5	0	2	124	133	140	23	18	13
45.1667	68	67	72	5	3	7	82	77	73	5	3	3	126	135	139	26	17	13
45.3333	68	70	71	4	4	5	83	75	74	3	4	4	119	137	145	26	17	14
45.5	66	69	67	3	6	6	80	74	79	3	4	2	122	139	136	26	16	13
45.6667	67	64	70	5	2	4	83	76	72	4	3	-1	122	137	138	25	17	14
45.8333	68	72	72	7	5	2	87	77	72	4	3	1	125	140	141	25	16	14
46	70	71	69	5	3	5	81	74	79	3	3	4	123	135	145	26	16	14
46.1667	63	70	71	4	4	5	78	76	71	2	3	2	121	139	138	25	18	12
46.3333	70	67	69	3	2	4	84	75	73	4	4	2	120	137	137	24	17	13
46.5	68	66	71	4	1	3	84	74	75	2	1	3	126	141	143	28	17	14
46.6667	67	70	66	5	6	3	77	76	74	4	4	4	123	137	144	23	17	14
46.8333	67	69	67	4	5	5	86	76	72	3	2	3	125	139	135	29	16	15
47	59	69	71	1	4	4	84	76	74	0	3	2	121	136	145	26	17	14
47.1667	68	69	73	3	2	6	80	70	78	2	1	2	120	138	136	27	15	12
47.3333	65	70	67	4	3	4	85	82	76	3	4	3	126	139	139	25	16	15
47.5	61	74	69	2	3	3	79	71	74	2	5	4	125	139	133	28	16	13
47.6667	68	72	70	4	7	4	80	75	76	2	4	4	127	139	140	27	18	14
47.8333	63	70	66	2	2	3	82	74	75	4	1	3	120	139	143	24	20	15
48	64	67	72	7	6	4	84	75	77	7	3	4	125	141	140	26	16	15
48.1667	64	69	71	2	4	5	80	75	73	1	4	5	122	139	141	24	16	14
48.3333	64	68	68	2	0	4	78	75	72	1	1	3	119	134	143	25	16	14
48.5	62	70	77	4	3	5	79	75	74	1	1	3	122	142	144	24	17	13
48.6667	64	73	70	4	3	4	81	75	75	2	2	5	122	139	141	23	17	15
48.8333	65	67	71	4	3	7	81	75	75	1	3	4	121	140	142	27	17	14
49	65	70	68	5	2	5	80	74	76	1	0	3	117	139	148	25	14	14
49.1667	68	67	67	3	3	3	78	75	71	3	0	3	120	138	140	26	16	13
49.3333	68	69	72	4	4	5	81	76	74	4	4	6	123	140	146	25	16	12
49.5	62	67	69	6	6	4	80	73	77	4	5	1	123	141	142	24	17	15
49.6667	66	73	74	5	4	8	83	75	74	3	4	2	123	140	144	24	15	13
49.8333	67	69	68	6	3	3	84	75	73	2	2	3	124	138	141	25	18	14
50	65	70	72	5	5	6	85	77	76	3	2	6	125	137	141	27	17	13
50.1667	63	65	67	7	2	5	84	73	75	2	2	3	125	135	139	24	18	15
50.3333	68	71	69	4	4	3	82	75	75	3	5	3	126	142	138	27	16	15
50.5	67	67	71	4	4	4	79	77	78	5	4	4	123	140	144	25	18	14
50.6667	64	66	65	2	4	5	81	77	71	3	3	2	122	142	141	24	19	12
50.8333	64	67	67	4	4	4	79	77	74	2	3	3	125	138	145	25	18	14
51	62	66	70	2	3	7	80	73	74	2	5	4	123	143	144	28	17	15
51.1667	65	68	68	2	4	7	81	76	79	2	0	5	127	140	144	25	19	14
51.3333	64	66	67	3	2	4	82	74	72	3	2	4	121	133	140	25	18	12
51.5	65	64	70	5	5	6	84	75	75	4	5	4	125	140	144	25	15	13
51.6667	61	67	75	3	4	6	80	74	76	3	0	4	126	136	143	24	19	14
51.8333	64	66	68	6	3	5	82	79	73	4	3	3	120	140	143	25	18	14
52	65	70	69	3	5	3	83	76	75	4	1	3	123	135	145	26	17	15
52.1667	68	65	70	3	4	4	81	74	73	2	2	3	121	134	134	27	18	14
52.3333	63	63	64	5	1	2	84	75	72	4	-1	1	125	137	140	28	18	13
52.5	67	64	64	6	3	3	80	77	73	2	2	0	124	137	141	25	18	14
52.6667	63	69	66	3	4	3	79	75	75	5	3	4	129	135	142	27	18	14
52.8333	65	68	69	4	4	4	83	73	78	4	3	2	122	143	145	25	17	13
53	66	65	67	3	3	1	83	74	73	3	2	0	125	135	143	24	17	16
53.1667	66	68	66	4	2	3	82	74	76	2	-1	2	125	140	145	25	17	13
53.3333	62	65	70	4	2	4	83	72	77	2	1	4	123	135	144	23	15	15
53.5	65	71	72	5	6	8	90	77	75	4	4	5	123	141	147	23	17	13
53.6667	65	63	71	4	3	3	81	76	74	2	2	3	127	147	145	28	17	13
53.8333	62	70	67	5	4	7	83	75	78	1	5	3	126	143	148	24	17	15
54	66	67	62	2	3	2	80	81	73	3	2	0	126	141	142	23	16	12
54.1667	60	67	66	4	3	6	84	76	77	3	2	6	126	145	149	27	18	14
54.3333	63	67	69	6	5	3	79	76	73	4	4	1	123	144	143	23	15	13
54.5	66	65	71	1	3	2	84	78	74	3	3	2	129	141	147	25	19	14
54.6667	61	67	72	2	4	6	82	76	78	5	2	2	128	139	149	24	18	12
54.8333	62	63	64	3	2	4	80	74	77	4	1	2	121	141	142	25	17	13
55	59	65	71	4	2	7	79	79	79	1	2	5	124	143	144	28	15	13
55.1667	61	66	68	5	4	3	81	78	73	3	2	2	126	141	143	26	16	13
55.3333	68	65	70	4	4	4	83	76	73	3	3	5	123	143	142	25	18	17
55.5	60	62	69	3	2	2	84	78	73	4	1	1	127	141	146	25	17	13
55.6667	64	68	70	2	5	7	81	71	77	2	5	4	120	141	146	23	20	13
55.8333	64	68	69	3	0	5	80	71	75	2	-3	4	126	140	145	23	18	14
56	61	64	71	3	4	8	83	75	79	3	0	6	121	141	144	27	18	13
56.1667	60	67	67	4	2	4	79	76	73	2	1	4	124	143	140	26	19	13
56.3333	65	65	68	5	-1	3	81	74	73	2	-1	4	125	139	141	23	18	15
56.5	63	62	71	3	2	6	82	69	74	3	2	2	126	143	149	24	15	11
56.6667	64	67	67	5	3	7	83	77	78	3	2	5	126	145	140	24	18	15
56.8333	61	67	66	7	4	3	87	74	76	3	5	1	126	138	145	26	16	15
57	65	64	68	4	3	4	81	74	79	1	1	4	124	143	148	24	16	15
57.1667	63	71	64	3	4	4	80	75	75	1	1	1	128	144	145	23	18	12
57.3333	67	66	65	9	2	6	86	73	70	5	3	2	128	146	146	21	17	16
57.5	67	67	66	4	4	3	79	72	69	2	5	2	125	146	145	25	17	15
57.6667	63	63	73	4	4	5	85	75	78	2	2	5	124	147	145	25	17	15
57.8333	66	65	71	7	2	5	83	74	78	5	1	4	130	140	151	25	15	15
58	71	65	66	5	3	6	85	75	76	5	2	2	123	137	147	23	18	13
58.1667	63	69	66	3	3	2	78	77	74	3	3	3	127	141	144	26	14	13
58.3333	62	65	66	3	3	4	81	74	73	4	3	3	129	142	141	25	18	14
58.5	63	67	66	3	5	4	85	72	74	2	1	4	125	139	144	24	15	15
58.6667	65	66	67	4	5	4	81	76	73	5	2	3	130	142	138	24	15	14
58.8333	61	63	67	4	5	3	82	71	74	3	2	2	128	144	141	27	18	15
59	63	67	67	4	5	3	80	78	74	2	3	2	123	147	143	28	17	12
59.1667	64	62	65	4	1	3	78	74	74	5	1	4	125	140	142	25	18	15
59.3333	65	67	65	6	3	1	82	75	73	3	4	1	125	143	148	24	15	12
59.5	65	66	70	5	0	6	85	73	75	2	2	2	128	146	146	26	18	11
59.6667	62	68	68	5	5	7	80	79	72	4	3	3	132	144	143	25	15	13
59.8333	64	65	69	6	1	4	82	74	72	4	1	5	125	142	147	23	18	14
60	65	66	70	5	2	5	83	72	73	3	2	3	123	146	149	25	17	14
60.1667	60	63	71	5	2	5	82	74	78	1	-1	4	120	141	146	25	16	14
60.3333	66	66	68	4	5	3	79	77	74	2	4	3	128	148	147	24	16	15
60.5	64	69	67	3	1	3	82	74	75	1	3	3	122	142	146	24	16	13
60.6667	62	68	70	4	4	4	80	79	74	2	2	3	129	145	146	24	17	16
60.8333	64	70	70	4	3	4	80	73	75	5	1	4	121	144	144	22	20	15
61	63	64	69	3	2	3	82	74	78	3	3	1	127	144	154	26	17	15
61.1667	61	69	66	5	4	6	83	76	73	5	4	4	130	147	149	24	18	14
61.3333	63	63	63	4	4	4	82	73	71	1	3	3	123	145	148	23	18	13
61.5	62	68	68	5	2	4	83	73	72	4	2	2	124	144	146	24	15	14
61.6667	66	67	64	5	3	4	78	78	77	3	2	4	120	145	145	25	17	18
61.8333	64	67	68	5	3	4	85	77	75	4	5	4	123	145	147	25	17	13
62	61	68	68	4	4	5	82	75	73	3	5	5	130	145	149	27	18	15
62.1667	63	64	72	3	3	4	82	75	73	3	1	4	126	142	145	24	15	12
62.3333	63	68	68	4	3	6	77	78	75	3	5	4	124	144	145	26	15	14
62.5	65	68	69	6	2	5	83	74	73	2	2	4	131	144	148	25	19	15
62.6667	62	66	69	6	3	5	79	74	74	2	1	3	127	145	149	25	16	15
62.8333	64	64	69	3	3	5	82	75	70	2	4	4	126	145	149	25	17	17
63	63	65	65	3	1	4	81	72	75	2	2	1	131	147	146	24	18	15
63.1667	67	67	62	3	4	4	83	77	75	4	3	2	130	145	144	25	17	15
63.3333	60	64	70	3	1	5	83	72	76	2	3	6	129	141	147	24	20	15
63.5	62	68	67	5	2	3	80	75	73	5	3	2	125	147	145	26	18	14
63.6667	64	66	67	7	4	4	84	76	75	4	1	3	123	146	147	24	18	13
63.8333	62	67	71	6	5	7	82	74	74	4	3	6	129	144	149	26	16	14
64	59	66	67	4	4	3	86	75	74	3	2	2	129	140	148	24	18	13
64.1667	67	67	64	4	4	4	80	81	73	5	3	2	124	147	147	25	18	13
64.3333	65	63	69	6	4	6	86	77	79	4	3	6	128	146	147	24	20	16
64.5	63	60	66	5	1	5	83	72	74	3	0	4	128	141	151	25	19	16
64.6667	62	69	66	5	6	4	78	74	74	3	4	4	125	147	146	25	19	14
64.8333	62	65	66	4	5	5	86	80	75	4	4	4	127	146	149	26	16	16
65	62	65	67	5	4	6	84	73	76	3	2	4	126	149	148	26	19	16
65.1667	59	68	68	4	2	5	82	76	75	0	1	2	123	145	147	28	18	12
65.3333	63	63	60	6	3	1	84	78	69	6	3	1	125	143	143	25	19	15
65.5	61	64	62	5	2	1	83	81	73	3	4	2	127	148	146	29	18	16
65.6667	61	67	66	2	4	3	81	75	78	3	3	3	132	152	143	25	20	15
65.8333	66	65	68	7	3	4	84	73	76	3	1	4	131	145	152	26	18	15
66	61	67	71	5	3	5	83	75	74	3	1	4	128	147	148	26	20	15
66.1667	60	67	69	4	3	8	84	79	78	3	3	5	124	148	147	26	17	16
66.3333	64	65	67	5	5	4	78	74	81	0	5	4	118	145	145	26	18	12
66.5	60	63	64	1	5	4	77	76	73	0	3	4	123	149	144	23	18	16
66.6667	63	69	66	2	5	4	81	77	80	3	5	2	129	146	151	26	18	15
66.8333	60	63	67	3	2	4	81	73	72	2	3	3	121	146	147	25	16	15
67	66	62	67	6	4	5	81	76	73	4	3	3	121	146	148	28	17	13
67.1667	62	63	69	4	2	7	81	73	75	1	1	5	125	144	145	27	19	14
67.3333	63	70	67	6	4	5	83	75	77	3	4	2	133	144	148	26	18	14
67.5	66	67	68	5	2	6	85	75	72	3	3	3	127	150	147	23	17	12
67.6667	61	67	62	3	2	4	81	76	74	2	2	2	129	147	148	24	18	15
67.8333	60	67	65	4	4	5	81	73	77	2	3	6	127	149	152	24	15	14
68	66	66	68	6	5	3	85	73	74	4	3	1	127	147	150	23	17	15
68.1667	64	69	63	4	6	3	80	76	73	4	5	3	130	152	146	25	17	13
68.3333	63	65	73	5	1	6	84	75	74	5	0	8	123	146	150	27	16	15
68.5	60	64	64	3	3	2	83	72	71	1	1	0	127	142	144	24	15	15
68.6667	61	63	68	3	1	5	76	72	72	3	2	3	120	142	152	26	16	16
68.8333	61	66	66	2	2	5	86	77	74	4	2	2	126	143	149	27	17	15
69	58	62	66	4	3	4	82	74	73	4	1	2	125	143	152	25	14	12
69.1667	64	65	65	6	3	5	80	74	75	4	1	2	125	143	147	25	19	14
69.3333	62	66	68	3	4	5	86	77	75	4	2	3	124	152	153	25	16	15
69.5	63	66	63	4	2	5	84	77	76	5	3	4	132	149	147	25	18	12
69.6667	63	69	69	4	4	6	80	79	79	1	4	5	129	151	153	24	17	12
69.8333	64	66	70	5	2	3	89	76	77	4	1	3	128	143	149	23	15	12
70	59	65	69	4	3	4	80	74	75	2	3	7	126	148	148	24	17	12
70.1667	62	66	69	2	3	5	80	78	73	1	4	2	126	148	150	25	15	14
70.3333	62	65	68	4	2	4	83	76	70	4	2	4	130	152	143	24	17	14
70.5	63	66	67	7	3	4	81	74	75	3	3	4	125	147	151	25	16	13
70.6667	58	66	69	2	4	5	82	76	72	0	4	1	129	150	150	24	16	15
70.8333	65	65	66	5	4	4	83	76	74	5	5	4	130	148	147	24	15	14
71	59	63	71	2	4	6	80	77	75	3	2	3	136	154	152	25	16	13
71.1667	60	68	66	4	3	4	85	74	77	3	3	4	130	148	151	26	17	15
71.3333	62	69	69	4	3	5	80	76	74	4	3	2	129	149	151	25	18	15
71.5	64	65	64	6	4	3	83	71	74	3	5	2	130	148	154	23	18	16
71.6667	64	68	69	6	5	7	85	74	81	6	4	5	127	156	152	25	20	14
71.8333	64	67	67	7	2	3	86	74	74	7	3	3	129	151	153	27	17	14
72	63	67	70	3	3	5	82	76	74	6	1	5	130	151	149	25	18	16

## Sheet: Fig2b
	S320F			WT
295-330	0.7511	0.7309	0.8557	54.18	51.46	60.17
306-330	7.101	5.181	8.847	46.11	58.02	31.38
295-324	4.422	5.169	6.487	25.91	17.78	26.16
306-324	0	0	0	0	0	0
316-330	72	72	72	72	72	72

## Sheet: Supplementary_fig2
Time Elapsed (hours)	WT 316-330			S320F 316-330			WT 306-324			S320F 306-324			306-330 WT			306-330 S320F				Time Elapsed (hours)	295-330 WT			295-330 S320F			295-324 WT			295-324 S320F
0	1	0	0	2	-1	1	4909	4954	4516	5018	3732	2961	1.42857	1.42857	1.71429	24.8571	18.8571	18		0	-21	-2	-8	419	426	409	52	53	52	190	183	146
0.166667	1	1	0	0	1	1	4935	5002	4502	5021	3736	2955	1.42857	1.71429	0.571429	25.1429	20.5714	18.2857		0.25	-15	2	-5	667	647	630	57	55	54	182	174	144
0.333333	0	0	-2	0	0	-2	4959	5054	4518	4976	3723	2945	0.571429	1.14286	1.14286	28.2857	22.2857	20.5714		0.5	-13	6	-2	874	850	790	58	57	55	182	175	153
0.5	-1	-1	1	-1	1	0	4999	5072	4520	5029	3725	2956	0.571429	1.42857	0.571429	33.1429	27.1429	25.1429		0.75	-8	7	2	997	937	826	55	57	56	181	175	150
0.666667	1	2	1	0	1	0	4986	5096	4539	4961	3730	2952	0.285714	1.42857	1.42857	40.2857	32.5714	30.5714		1	-12	8	3	1174	1105	948	63	59	59	189	183	154
0.833333	-2	0	1	-1	0	1	4999	5087	4544	4993	3739	2970	1.14286	0.571429	1.14286	45.1429	37.1429	32.8571		1.25	-6	10	3	1589	1455	1260	58	60	58	193	198	162
1	0	1	-1	2	0	0	4999	5103	4555	4977	3686	3054	1.42857	1.14286	1.42857	53.1429	42	37.1429		1.5	-2	16	2	1680	1520	1332	59	60	59	199	199	163
1.16667	0	1	1	0	2	1	5023	5116	4559	4970	3710	3087	1.71429	1.42857	2.28571	54	44.5714	39.4286		1.75	3	22	10	1690	1549	1346	59	64	56	208	215	167
1.33333	1	1	1	2	1	1	5041	5111	4530	4953	3693	3106	3.42857	3.14286	1.71429	57.7143	50.8571	42		2	13	33	16	1693	1563	1347	59	58	59	208	212	165
1.5	1	1	0	-1	1	1	5016	5088	4521	4934	3696	3089	4.85714	3.14286	2	62.5714	52.5714	46		2.25	15	34	17	1672	1556	1364	57	61	58	216	227	173
1.66667	1	0	0	0	1	0	5023	5083	4496	4939	3708	3070	5.14286	4.28571	2.85714	63.1429	57.7143	47.4286		2.5	18	34	27	1670	1570	1360	62	64	61	225	238	183
1.83333	1	1	0	0	0	1	4998	5065	4508	4918	3700	3082	6.57143	5.14286	4	67.4286	60.2857	50.2857		2.75	19	37	29	1694	1567	1374	62	64	59	233	246	187
2	0	0	1	0	0	0	4984	5117	4505	4917	3655	3100	8.28571	5.42857	4.85714	71.7143	60.5714	53.1429		3	24	39	31	1696	1548	1348	58	65	60	243	256	198
2.16667	1	1	1	1	3	2	5017	5128	4548	4921	3679	3098	8	6.85714	5.14286	72.5714	64.2857	57.1429		3.25	22	37	35	1686	1545	1367	60	62	58	257	263	209
2.33333	-1	2	1	-1	1	2	5027	5093	4544	4917	3722	3026	8.28571	7.14286	5.14286	73.1429	71.4286	63.4286		3.5	22	39	34	1668	1541	1369	62	64	55	265	276	213
2.5	0	0	2	0	0	1	5047	5104	4562	4932	3688	3027	8.28571	7.71429	5.71429	76.2857	78	66.8571		3.75	28	35	37	1674	1546	1358	63	60	63	274	285	223
2.66667	1	0	2	1	1	1	5036	5113	4566	4947	3719	3080	8.57143	6.85714	5.42857	81.1429	80.5714	72.2857		4	23	43	36	1655	1548	1358	65	66	58	292	293	234
2.83333	1	1	1	1	0	1	5032	5155	4599	4979	3722	3082	8.28571	6.85714	5.42857	83.1429	89.7143	74		4.25	24	43	33	1654	1537	1373	58	68	61	302	310	244
3	0	-1	0	1	-1	1	5041	5179	4575	5013	3749	3092	9.42857	7.42857	6.85714	86	97.1429	81.7143		4.5	24	44	36	1653	1509	1379	61	66	62	317	330	251
3.16667	0	0	0	0	-1	0	5036	5152	4590	5031	3759	3098	8.85714	8.28571	6.85714	90	105.143	82		4.75	26	44	39	1648	1533	1355	66	66	59	328	342	261
3.33333	1	-1	1	1	0	2	5077	5167	4559	4988	3741	3073	9.14286	7.42857	6.85714	98.8571	110.286	86		5	29	43	39	1654	1518	1384	61	64	59	344	356	273
3.5	-1	1	1	0	1	0	5020	5178	4585	4994	3741	3074	9.71429	7.14286	6.28571	103.429	118.286	88		5.25	30	41	37	1636	1520	1366	67	71	62	350	385	279
3.66667	0	0	0	0	0	1	5008	5184	4599	4977	3754	3052	9.71429	7.42857	6	106	128	90		5.5	35	45	41	1616	1507	1359	65	72	59	354	412	293
3.83333	-1	1	-1	0	0	-1	4952	5150	4591	4998	3758	3086	10	8	6.28571	114.286	137.143	86.2857		5.75	28	47	40	1613	1490	1396	62	74	65	363	427	303
4	0	1	1	0	1	2	5036	5158	4594	5021	3774	3084	10	7.42857	6.85714	121.143	140.857	87.4286		6	34	47	42	1597	1485	1407	67	80	61	377	448	315
4.16667	1	1	2	2	1	1	5017	5147	4585	5008	3769	3103	10	7.71429	6.57143	121.714	144.571	88.8571		6.25	34	42	45	1611	1478	1402	66	76	67	380	463	323
4.33333	2	1	0	2	1	0	5055	5170	4615	5022	3783	3072	11.4286	7.42857	5.71429	121.714	162	86.2857		6.5	31	49	43	1610	1486	1414	72	83	67	391	481	335
4.5	1	1	2	2	1	1	5056	5184	4582	5017	3764	3069	10.5714	7.71429	7.42857	126	169.714	89.4286		6.75	33	48	44	1578	1484	1420	68	86	67	402	497	349
4.66667	1	1	1	1	2	0	5059	5193	4578	5014	3783	3048	10.5714	8.28571	6.57143	130.571	172.857	90.2857		7	38	49	46	1573	1474	1411	68	89	69	419	509	359
4.83333	0	1	1	2	1	0	5082	5157	4599	4998	3787	3051	10.8571	8.28571	6.28571	138.571	185.143	90		7.25	39	50	46	1583	1481	1406	74	85	72	424	531	362
5	-1	1	2	-3	2	2	5079	5185	4586	5015	3793	3073	10.2857	8	8	150.857	196.286	94.8571		7.5	38	47	43	1580	1453	1399	74	97	71	428	550	378
5.16667	-2	-1	-1	-2	1	0	5041	5211	4582	5001	3759	3038	11.7143	8.85714	7.42857	171.714	204.286	99.1429		7.75	36	47	51	1569	1445	1396	77	92	77	428	574	385
5.33333	0	-2	2	0	1	2	5069	5204	4417	5013	3750	3086	11.1429	8.85714	7.14286	196.857	267.429	99.4286		8	39	50	48	1567	1458	1387	78	99	72	415	574	391
5.5	-1	1	3	0	1	2	5073	5226	4477	4988	3749	3066	12	8.57143	8.28571	214	302.286	106		8.25	39	51	48	1544	1443	1376	84	99	78	423	575	393
5.66667	0	0	1	0	0	3	5034	5191	4467	5030	3709	3086	11.4286	8.57143	7.42857	228.857	336.286	113.714		8.5	42	51	51	1544	1428	1349	80	110	78	420	577	396
5.83333	1	1	0	1	1	0	5039	5240	4420	4994	3718	3056	11.4286	8.57143	6.85714	237.714	354.286	120.571		8.75	45	53	51	1541	1436	1359	81	103	82	419	580	402
6	1	-1	1	1	0	0	5044	5212	4453	4973	3705	3050	11.4286	8.85714	7.14286	248.286	413.429	124.571		9	39	53	51	1554	1438	1381	82	105	81	427	577	408
6.16667	0	2	0	0	2	1	5025	5194	4443	4994	3695	3044	12.5714	8.85714	7.42857	261.429	436.286	126		9.25	43	53	50	1542	1414	1355	87	109	82	428	591	410
6.33333	0	1	-1	1	1	-1	4994	5203	4477	4990	3682	3052	12.5714	9.14286	8	278.571	459.429	118.571		9.5	40	53	51	1541	1425	1345	82	106	82	429	590	403
6.5	0	2	0	2	1	1	5026	5190	4504	4977	3677	3059	11.7143	8.85714	7.42857	294.286	488	120.286		9.75	44	54	50	1519	1402	1350	84	112	83	431	587	413
6.66667	-1	0	1	0	0	0	4979	5243	4464	4991	3658	3053	11.7143	8.85714	8.57143	304.286	480.857	120.286		10	45	57	56	1531	1408	1334	89	112	83	431	600	415
6.83333	1	1	-1	2	1	-1	4997	5228	4463	4998	3652	3076	11.7143	9.71429	7.42857	316	478.286	126		10.25	48	54	52	1530	1404	1333	88	112	86	429	597	411
7	0	1	3	0	1	1	4969	5219	4485	4973	3646	3050	11.7143	9.71429	8	347.714	491.429	122.571		10.5	47	60	53	1519	1407	1325	91	123	86	435	601	414
7.16667	0	0	3	0	2	1	4982	5200	4473	5008	3628	3060	12.5714	9.42857	8.28571	363.429	484.571	125.429		10.75	51	62	50	1517	1387	1316	92	119	87	437	614	418
7.33333	0	0	1	0	0	0	4960	5200	4468	4991	3672	3023	12.2857	9.71429	7.42857	378.571	480.571	131.429		11	46	63	54	1506	1394	1305	91	123	89	441	609	417
7.5	0	0	1	-1	-1	1	4921	5112	4478	4968	3668	3055	12.8571	10.2857	8	383.714	476.286	134.571		11.25	49	61	54	1504	1374	1296	96	123	93	434	621	419
7.66667	0	2	2	0	2	1	4926	5152	4466	4966	3665	3049	12.2857	8.85714	8.85714	390.571	479.714	146.571		11.5	51	59	55	1497	1377	1308	99	125	95	440	636	424
7.83333	-1	2	1	0	0	1	4887	5208	4421	4938	3658	3032	13.4286	9.14286	8	398.286	480.857	154		11.75	49	65	55	1479	1371	1305	98	123	93	440	623	423
8	-1	-1	1	-2	1	2	4877	5176	4442	4934	3692	3044	12.8571	9.71429	8.57143	409.429	486	154.286		12	49	66	56	1484	1374	1280	99	133	95	449	638	429
8.16667	3	0	1	1	0	1	4843	5165	4448	4919	3655	3021	12.5714	9.71429	8.57143	420	487.429	150.857		12.25	52	66	60	1491	1349	1277	100	130	92	452	633	423
8.33333	0	0	1	0	0	1	4860	5160	4456	4912	3676	3018	13.4286	9.42857	8.57143	440.571	462	154.286		12.5	51	64	59	1465	1355	1261	101	130	93	452	634	437
8.5	1	1	0	1	2	-1	4846	5152	4472	4910	3662	2997	13.1429	10.8571	8.57143	445.714	466	166.571		12.75	58	65	61	1475	1354	1258	97	130	98	461	641	430
8.66667	0	1	0	0	1	1	4831	5123	4468	4943	3694	3022	12.2857	10	8.28571	456.857	468.857	192.286		13	55	67	61	1457	1344	1259	100	131	100	461	620	430
8.83333	0	1	0	1	1	1	4825	5131	4454	4896	3675	2982	12.8571	10.5714	9.14286	471.714	442.286	231.429		13.25	53	71	60	1442	1339	1264	102	137	96	464	630	437
9	1	1	1	-1	1	1	4853	5141	4408	4905	3681	3000	14	10	7.71429	485.429	452.571	295.714		13.5	60	68	58	1447	1342	1245	105	140	100	456	619	461
9.16667	-1	-1	0	0	0	-1	4811	5123	4420	4891	3661	3004	13.1429	9.71429	9.14286	489.429	461.429	419.143		13.75	54	72	59	1431	1323	1256	103	139	102	454	622	455
9.33333	0	2	1	-1	2	1	4828	5086	4432	4905	3690	3009	13.1429	10	8.85714	513.714	459.143	512		14	60	71	57	1435	1320	1239	106	147	103	472	625	464
9.5	0	0	1	1	0	0	4749	5071	4400	4914	3663	2992	13.4286	10.5714	9.14286	522.571	463.714	556.571		14.25	58	72	61	1429	1317	1243	110	144	101	470	614	469
9.66667	0	-2	2	1	-2	1	4785	5058	4368	4873	3654	2983	12.8571	10.2857	9.71429	557.429	468.571	562.571		14.5	65	71	64	1418	1302	1244	105	145	105	479	618	477
9.83333	0	-1	1	0	0	1	4787	5050	4338	4877	3656	2988	13.1429	10.5714	8	564.571	473.429	536.286		14.75	63	73	62	1409	1307	1231	106	148	107	491	624	475
10	0	1	-1	1	2	0	4791	5120	4344	4862	3656	3001	13.4286	10.2857	9.42857	587.429	474.857	510.857		15	63	77	62	1419	1307	1220	110	160	111	494	616	490
10.1667	0	1	2	0	0	1	4837	5072	4372	4872	3667	2947	13.4286	10.5714	9.14286	615.714	483.714	549.714		15.25	70	75	65	1410	1292	1233	113	160	116	503	613	502
10.3333	-1	1	0	-1	1	0	4801	5094	4348	4879	3678	2973	14.2857	10.2857	8.57143	620.571	474.857	540.571		15.5	70	79	64	1399	1287	1199	107	163	110	494	620	502
10.5	0	-1	0	0	0	0	4844	5089	4355	4883	3656	2973	13.4286	10.8571	8.85714	627.429	485.143	558.571		15.75	74	77	67	1387	1275	1213	110	164	115	488	631	504
10.6667	-1	-1	1	1	1	2	4797	5043	4354	4852	3631	2945	13.7143	10.2857	9.14286	634	489.143	542.286		16	72	81	69	1380	1281	1213	108	169	117	487	617	511
10.8333	0	-1	0	0	-1	-1	4796	5032	4358	4868	3647	2922	12.5714	10.5714	9.14286	642.857	487.143	505.714		16.25	77	82	63	1397	1271	1191	114	168	117	491	631	521
11	0	0	1	1	1	1	4854	5035	4352	4854	3620	2914	14	10.2857	8	658.857	484.571	498		16.5	73	84	68	1376	1280	1208	113	177	121	482	628	507
11.1667	2	-1	0	1	0	1	4813	4989	4362	4840	3629	2900	13.4286	10.2857	9.42857	660.286	495.429	508.286		16.75	78	90	72	1386	1252	1196	112	179	124	470	631	502
11.3333	0	2	1	1	2	-1	4820	5007	4318	4838	3627	2865	14.2857	10	9.42857	680	516	524.286		17	77	88	72	1375	1273	1197	116	182	125	481	621	508
11.5	1	1	0	1	0	-1	4788	5049	4323	4814	3631	2880	14	11.4286	9.71429	678.571	519.714	556		17.25	76	97	70	1374	1244	1206	114	185	126	484	630	508
11.6667	0	2	0	0	2	-1	4808	5059	4348	4822	3612	2877	13.7143	10.8571	9.42857	679.714	512.286	644.286		17.5	78	99	72	1374	1253	1189	116	193	130	495	626	516
11.8333	1	1	2	1	0	1	4785	5029	4318	4836	3628	2859	14	10.5714	9.14286	688.286	503.143	696.857		17.75	83	102	75	1376	1260	1205	116	197	125	488	642	523
12	0	1	2	0	0	1	4831	5021	4311	4845	3632	2850	14.2857	10.8571	8.85714	727.143	501.714	736.571		18	79	100	78	1371	1244	1185	125	205	132	488	631	523
12.1667	1	0	1	0	2	1	4828	5005	4335	4833	3621	2838	13.4286	10.8571	9.42857	771.714	506.286	711.429		18.25	85	100	78	1363	1249	1188	119	208	132	476	644	518
12.3333	0	0	2	0	-1	1	4829	4968	4334	4818	3611	2827	13.7143	10.5714	9.14286	814.286	508.571	697.429		18.5	87	102	75	1347	1249	1168	120	205	135	481	645	525
12.5	0	-2	1	1	1	2	4848	5023	4347	4853	3603	2819	14.2857	10.8571	9.14286	839.714	494	695.714		18.75	91	102	77	1351	1243	1188	123	209	128	483	652	525
12.6667	1	0	2	1	0	0	4836	5029	4331	4791	3599	2839	13.7143	10.5714	9.42857	912.857	507.143	675.429		19	93	100	81	1341	1230	1176	126	216	136	473	665	535
12.8333	1	0	2	1	1	3	4826	4987	4285	4782	3583	2822	13.4286	10.2857	8.57143	968.286	522.286	642.286		19.25	92	100	82	1347	1236	1170	125	220	140	486	675	540
13	0	1	0	0	1	-1	4809	5004	4269	4767	3573	2810	12.8571	11.1429	9.14286	1013.71	521.714	613.429		19.5	100	107	81	1341	1232	1171	129	221	141	467	680	549
13.1667	0	-1	0	2	1	0	4782	4954	4259	4783	3593	2790	13.7143	11.4286	8.85714	1045.14	517.714	598.571		19.75	99	104	83	1335	1206	1156	131	230	140	489	682	544
13.3333	0	0	0	0	0	1	4796	4952	4223	4763	3583	2793	14.5714	10.5714	8.28571	1098.57	505.714	583.429		20	97	108	82	1337	1204	1161	137	238	139	480	688	532
13.5	2	0	0	1	1	2	4784	4918	4227	4744	3570	2793	14	10.5714	9.71429	1134	495.714	590		20.25	109	113	83	1323	1220	1166	128	239	140	486	681	539
13.6667	0	-2	2	1	0	1	4756	4944	4245	4708	3551	2756	14	11.1429	9.42857	1207.14	488	598		20.5	112	118	86	1329	1214	1155	135	250	142	495	685	558
13.8333	1	0	1	1	0	2	4761	4894	4236	4738	3541	2762	15.1429	11.4286	9.14286	1226.86	499.143	641.714		20.75	114	125	87	1319	1211	1143	137	255	144	485	690	569
14	-1	1	-1	1	2	0	4739	4959	4218	4700	3535	2717	14.2857	11.1429	8.85714	1171.43	500.857	660		21	107	124	88	1314	1210	1148	141	252	147	490	676	565
14.1667	1	0	0	0	0	1	4725	4922	4179	4654	3536	2731	14.8571	11.7143	9.42857	1040	509.143	711.714		21.25	115	121	88	1304	1212	1149	144	263	147	485	665	564
14.3333	2	2	-1	1	1	0	4746	4916	4202	4675	3496	2694	13.7143	11.7143	9.14286	665.714	516.286	734.857		21.5	116	121	87	1311	1210	1141	144	262	151	502	658	564
14.5	0	1	2	1	1	2	4742	4905	4170	4679	3532	2685	13.4286	11.1429	8.85714	604.286	521.429	758.857		21.75	120	121	88	1302	1198	1123	145	272	148	482	669	564
14.6667	1	1	3	3	1	3	4751	4864	4170	4642	3529	2676	14.8571	11.1429	9.14286	609.714	518	710.286		22	129	118	91	1294	1192	1128	148	268	151	487	673	566
14.8333	-1	2	2	1	2	2	4787	4901	4150	4641	3497	2671	15.1429	11.4286	10	621.143	520	649.429		22.25	132	121	93	1281	1197	1127	148	278	147	501	649	574
15	1	0	-1	0	1	-1	4749	4920	4160	4621	3511	2688	15.4286	10.8571	10	642	523.143	634.571		22.5	131	123	90	1289	1186	1122	153	280	163	507	654	576
15.1667	1	1	-1	1	1	0	4784	4919	4139	4653	3504	2660	14	12	9.42857	656	530	610.857		22.75	140	120	94	1295	1179	1106	152	287	160	497	638	582
15.3333	1	0	0	2	0	1	4767	4905	4128	4625	3522	2669	14.2857	11.7143	8.57143	675.429	537.143	584		23	139	121	91	1280	1178	1114	152	287	157	498	637	567
15.5	1	-1	2	2	0	1	4770	4900	4136	4653	3492	2614	14	11.7143	8.28571	679.143	536.571	612.286		23.25	136	126	89	1272	1162	1093	156	288	154	481	643	579
15.6667	1	0	2	0	1	1	4782	4843	4111	4652	3494	2630	14.5714	10.5714	10	680.571	532.286	616.286		23.5	143	122	91	1298	1179	1096	164	297	160	470	619	577
15.8333	0	0	0	1	1	1	4762	4835	4121	4614	3493	2625	14	11.7143	9.42857	686.286	530.857	573.429		23.75	140	127	90	1298	1157	1101	160	299	164	461	605	589
16	0	1	0	-1	2	-1	4780	4856	4138	4618	3498	2653	14	11.4286	9.14286	702.857	522.286	534		24	146	127	95	1275	1171	1091	161	300	164	466	590	580
16.1667	-1	1	1	-1	0	0	4784	4907	4125	4632	3469	2625	15.1429	11.7143	9.14286	708.286	529.714	535.143		24.25	147	131	99	1281	1151	1091	167	304	165	458	600	591
16.3333	1	-1	-1	0	0	0	4812	4859	4116	4615	3490	2626	14.5714	11.1429	10	713.429	521.714	531.429		24.5	145	131	93	1271	1158	1093	169	305	164	455	582	595
16.5	1	2	1	1	1	0	4797	4847	4131	4635	3498	2612	14	11.1429	9.71429	716.286	508.571	559.143		24.75	149	135	93	1265	1142	1084	176	302	170	461	587	600
16.6667	0	0	0	0	0	1	4801	4869	4158	4616	3504	2620	14.5714	11.7143	9.71429	727.143	506.571	563.714		25	149	135	94	1277	1143	1101	178	301	176	452	579	600
16.8333	-1	-2	1	-2	0	-1	4857	4910	4166	4652	3485	2631	14.8571	10.8571	11.1429	731.143	508.571	581.143		25.25	143	140	96	1273	1146	1086	178	318	177	462	583	606
17	1	0	2	1	0	3	4823	4904	4154	4635	3496	2605	14.8571	12.2857	9.71429	722.571	509.429	573.714		25.5	144	138	95	1269	1140	1089	177	310	171	463	578	611
17.1667	0	1	1	0	0	2	4835	4912	4168	4620	3484	2596	16.8571	11.7143	9.71429	738.286	513.429	600.857		25.75	150	146	92	1263	1145	1080	183	320	177	451	593	604
17.3333	2	2	1	0	0	2	4830	4897	4151	4644	3461	2592	14.5714	11.7143	10.2857	731.714	499.714	606.286		26	149	148	97	1272	1146	1088	186	316	181	455	599	607
17.5	-1	1	0	0	1	0	4829	4898	4146	4633	3481	2580	14.8571	11.4286	10	729.143	492.857	595.429		26.25	149	151	95	1248	1140	1095	190	324	184	466	590	604
17.6667	1	0	0	1	-1	0	4806	4916	4108	4592	3457	2568	14.8571	11.4286	10.5714	730.286	485.429	619.143		26.5	148	149	97	1246	1133	1070	195	318	184	468	594	597
17.8333	-1	1	1	0	0	2	4821	4862	4098	4625	3441	2552	16.5714	12.2857	10	723.714	494.571	684.286		26.75	152	150	99	1257	1117	1070	200	323	182	461	579	602
18	0	0	2	0	1	3	4819	4858	4106	4583	3454	2572	16.2857	11.4286	10.8571	718.286	474.571	735.714		27	150	149	102	1261	1124	1076	204	320	194	452	569	602
18.1667	0	0	1	0	2	1	4835	4869	4116	4616	3454	2574	15.7143	11.4286	10.2857	705.143	462.571	690.571		27.25	148	154	100	1241	1128	1061	200	326	197	463	566	583
18.3333	0	0	0	0	1	0	4845	4881	4143	4632	3476	2576	16.8571	12.8571	10	690.571	453.714	640.286		27.5	149	153	97	1230	1109	1064	194	331	208	470	565	589
18.5	2	1	0	0	0	0	4844	4869	4123	4607	3428	2566	16.2857	12.2857	10.5714	672.286	440.286	515.143		27.75	153	154	102	1232	1107	1050	210	326	214	472	576	573
18.6667	0	0	2	0	0	1	4842	4958	4156	4617	3451	2569	17.7143	11.7143	11.1429	658.571	427.429	485.714		28	153	157	98	1217	1098	1052	213	336	223	478	566	565
18.8333	2	1	1	0	0	0	4852	4959	4159	4619	3457	2547	16.8571	11.4286	11.1429	641.429	434.286	388.571		28.25	147	157	95	1196	1097	1025	208	335	224	473	565	551
19	0	0	0	0	1	1	4856	4929	4158	4600	3460	2555	17.1429	12	11.4286	621.143	430.571	373.429		28.5	139	144	103	1199	1100	1038	217	330	227	471	577	563
19.1667	2	0	1	2	2	0	4838	4948	4178	4585	3475	2514	18.2857	12	11.7143	622.857	428.571	335.429		28.75	147	147	100	1201	1088	1036	215	329	230	467	570	560
19.3333	1	0	1	2	1	1	4846	4975	4196	4603	3488	2553	17.4286	12	10.5714	629.143	444.571	336		29	146	159	107	1193	1094	1035	210	346	233	456	576	550
19.5	0	0	1	0	-1	-1	4900	4954	4178	4585	3475	2543	17.7143	11.1429	11.7143	632.571	457.429	354.857		29.25	143	156	104	1217	1074	1046	219	335	246	456	581	551
19.6667	0	0	2	0	1	3	4845	4930	4159	4583	3472	2559	17.7143	12	12	638.286	455.143	362.857		29.5	149	156	106	1191	1080	1040	217	337	245	452	588	545
19.8333	0	2	0	1	0	0	4855	4944	4171	4591	3464	2562	18.2857	11.7143	11.4286	631.429	444.857	364.857		29.75	147	156	104	1205	1064	1034	213	332	247	453	589	547
20	1	0	0	1	1	1	4805	4912	4169	4584	3465	2533	18.5714	11.7143	11.4286	620	449.714	380.286		30	148	161	101	1192	1078	1018	219	340	260	446	594	541
20.1667	1	0	2	1	1	2	4844	4954	4190	4596	3460	2522	18.2857	12.2857	12	622.286	491.143	364.571		30.25	148	165	99	1188	1072	1017	217	344	256	454	595	545
20.3333	0	2	0	0	2	0	4874	4957	4177	4594	3462	2539	17.4286	11.4286	11.4286	625.714	521.143	327.714		30.5	154	162	104	1176	1061	1007	217	340	249	449	599	538
20.5	1	1	0	1	2	0	4854	4959	4175	4583	3477	2553	17.7143	11.4286	11.1429	628.571	472	340.571		30.75	151	158	105	1175	1059	1013	216	348	256	442	595	535
20.6667	0	2	0	0	1	0	4866	4970	4180	4631	3456	2549	19.1429	11.4286	10.2857	635.714	467.429	368.571		31	146	165	106	1163	1045	1008	213	346	259	448	596	533
20.8333	0	0	2	0	0	0	4831	4934	4159	4588	3462	2542	18	11.7143	10.8571	630.571	470.857	395.714		31.25	153	165	99	1176	1056	1000	204	344	263	451	597	528
21	2	1	0	1	2	1	4819	4941	4202	4602	3467	2516	17.7143	11.7143	12	628.571	486.286	414.857		31.5	155	161	104	1180	1052	988	214	346	256	446	587	530
21.1667	0	-2	0	1	-1	0	4842	4970	4164	4593	3465	2535	19.4286	11.4286	10.8571	627.429	501.714	440		31.75	149	166	103	1164	1042	992	209	343	261	444	603	514
21.3333	1	1	3	3	1	1	4842	4992	4183	4606	3448	2534	18.5714	11.4286	10.8571	624.571	501.429	413.714		32	156	159	104	1173	1030	985	217	352	264	442	597	504
21.5	1	1	0	0	0	0	4845	4969	4200	4589	3451	2556	18.5714	11.7143	10	624.571	520.857	460		32.25	156	165	107	1162	1042	982	214	346	273	439	590	503
21.6667	0	1	-1	0	1	1	4814	5010	4202	4566	3442	2541	18.2857	11.4286	10.8571	636.571	512	409.429		32.5	156	162	109	1152	1035	979	224	351	270	437	602	492
21.8333	1	1	1	2	1	2	4878	4978	4197	4591	3454	2537	18.2857	12	11.1429	634.857	483.143	376.571		32.75	170	162	103	1137	1041	975	222	337	271	436	614	494
22	-1	1	-1	0	3	-1	4877	5010	4191	4581	3439	2561	18.5714	11.7143	11.4286	631.714	477.429	369.143		33	170	166	108	1153	1031	978	226	340	283	430	613	485
22.1667	0	-1	1	0	0	2	4892	4969	4186	4620	3458	2562	17.1429	12.5714	9.71429	644	479.429	330		33.25	169	159	107	1136	1007	977	230	341	283	436	613	492
22.3333	1	1	-1	2	1	0	4859	5008	4182	4618	3436	2545	18.2857	10.8571	10.2857	651.429	485.714	368.857		33.5	169	159	103	1139	1020	971	232	342	281	432	625	491
22.5	1	2	1	1	1	2	4865	5003	4197	4580	3449	2539	18.2857	11.4286	10.5714	657.714	484.286	419.429		33.75	164	159	108	1131	1024	974	233	346	278	426	623	494
22.6667	0	0	1	1	0	2	4898	5012	4196	4606	3447	2564	17.7143	12	10.8571	660.286	492.857	431.714		34	170	155	108	1137	1021	957	236	342	282	419	627	494
22.8333	1	1	0	1	1	1	4881	4977	4177	4605	3433	2559	17.7143	12.2857	10.5714	667.714	490.857	371.143		34.25	177	161	114	1115	1016	964	241	347	278	416	635	507
23	0	2	1	-1	3	2	4864	5010	4172	4585	3436	2571	19.7143	11.7143	11.1429	676.857	484	363.429		34.5	171	163	107	1121	1015	963	254	342	276	420	624	505
23.1667	0	2	0	0	2	1	4850	4978	4156	4584	3402	2525	18.5714	12.2857	10.8571	669.143	502.571	382.857		34.75	166	161	108	1114	1009	955	248	345	281	410	618	502
23.3333	1	1	0	0	1	0	4826	4977	4154	4590	3394	2547	19.1429	12.8571	10.8571	666.571	502	371.143		35	162	163	111	1125	1020	951	258	348	270	417	600	497
23.5	0	0	1	1	1	1	4863	4996	4140	4556	3411	2504	18.8571	11.7143	10.5714	658.571	510.571	398.857		35.25	158	170	113	1109	1012	946	260	347	268	406	601	496
23.6667	1	1	1	2	1	2	4863	4997	4122	4541	3426	2519	17.4286	11.1429	11.1429	661.429	510	350		35.5	165	174	116	1115	1007	956	266	351	274	408	588	503
23.8333	0	1	1	1	1	0	4892	4957	4126	4569	3408	2509	20.2857	11.7143	11.4286	660	492.571	304.857		35.75	168	182	109	1107	993	954	276	352	268	408	581	497
24	0	1	1	0	1	0	4861	4998	4175	4525	3391	2511	20	11.4286	11.1429	649.429	497.143	359.714		36	169	183	113	1090	987	942	278	345	275	406	574	490
24.1667	0	0	3	0	-2	1	4853	4984	4161	4537	3418	2514	18.8571	11.7143	11.4286	646.571	504	402		36.25	176	176	109	1093	996	942	274	356	264	399	573	485
24.3333	2	2	1	1	1	0	4893	5000	4143	4528	3416	2526	19.1429	12	11.1429	646.571	509.714	445.429		36.5	177	181	114	1106	995	935	277	351	262	411	568	480
24.5	1	1	2	-1	0	1	4869	5009	4153	4515	3422	2525	19.4286	11.4286	11.7143	632.857	504.571	607.714		36.75	181	179	111	1110	992	942	278	353	270	404	565	489
24.6667	2	0	1	3	0	1	4890	5021	4189	4510	3390	2509	19.4286	11.1429	11.7143	636.571	499.429	429.143		37	180	179	115	1096	998	937	280	347	265	404	552	484
24.8333	1	0	1	1	0	1	4859	5019	4154	4510	3403	2512	19.7143	10.8571	11.4286	630.857	500.857	376		37.25	178	172	115	1100	989	930	288	353	264	396	553	482
25	1	0	1	1	1	1	4842	4988	4189	4488	3421	2504	18.2857	11.1429	12.5714	627.429	507.143	366.857		37.5	171	169	121	1092	988	922	281	350	265	410	551	473
25.1667	0	0	-1	0	0	1	4875	4993	4191	4489	3402	2503	18.5714	11.4286	11.1429	633.714	507.429	365.714		37.75	161	170	115	1073	977	934	279	340	258	402	552	474
25.3333	2	2	2	2	1	1	4869	4989	4142	4501	3405	2515	18.8571	11.7143	11.7143	642.857	509.714	454		38	167	174	117	1089	975	921	294	353	261	405	552	461
25.5	1	0	1	2	0	2	4896	4984	4165	4471	3407	2490	18.8571	11.1429	10.2857	648	514	453.143		38.25	177	174	114	1085	975	911	289	351	261	403	556	469
25.6667	0	1	0	2	0	1	4906	4993	4166	4514	3401	2523	19.4286	11.4286	11.1429	666.857	501.143	502.286		38.5	197	174	115	1086	991	913	292	348	269	406	541	470
25.8333	1	0	1	1	0	1	4870	5063	4165	4540	3385	2496	19.1429	12.5714	12.2857	653.143	504	372.286		38.75	189	173	114	1090	965	908	291	345	261	404	543	461
26	1	0	0	0	1	0	4888	5013	4187	4518	3426	2510	18.5714	11.7143	12.5714	648.857	514.286	402.571		39	188	176	111	1068	956	918	292	354	260	395	539	456
26.1667	0	0	2	0	0	2	4892	5012	4164	4476	3383	2496	18.8571	11.4286	12	646.571	506.571	399.714		39.25	186	183	117	1077	965	924	302	350	264	408	542	465
26.3333	1	0	0	2	0	0	4883	4991	4163	4496	3371	2507	19.4286	11.1429	12.2857	646.571	514.286	439.143		39.5	182	181	114	1064	962	909	292	356	264	407	538	467
26.5	1	0	1	1	1	2	4848	4959	4146	4486	3357	2474	18.8571	12.2857	12.2857	648.857	498.286	493.714		39.75	187	180	117	1069	955	899	300	345	262	400	535	460
26.6667	1	2	-1	2	1	0	4835	4987	4152	4478	3351	2456	18.2857	12	12.5714	652.857	512.571	342.857		40	179	180	118	1069	972	892	294	345	261	399	535	457
26.8333	1	0	2	2	0	1	4816	4985	4123	4422	3344	2476	18	11.7143	12.5714	637.143	519.429	330		40.25	182	182	121	1052	953	902	302	348	271	395	534	464
27	2	1	1	2	1	1	4846	4960	4128	4451	3347	2452	19.7143	11.4286	12.5714	640.286	514.286	352.857		40.5	184	186	118	1051	958	895	294	350	272	402	534	458
27.1667	1	1	0	1	2	0	4860	4971	4170	4492	3363	2461	17.7143	10.8571	11.4286	635.429	508.571	439.143		40.75	193	186	117	1060	943	905	302	350	267	395	527	448
27.3333	0	1	1	1	1	2	4882	5007	4155	4499	3346	2464	18.8571	10.5714	14	630.286	511.143	426.857		41	186	191	119	1041	947	872	296	349	277	404	517	446
27.5	1	0	0	1	1	1	4858	4968	4182	4461	3343	2473	19.7143	11.4286	15.1429	623.429	512.286	337.429		41.25	198	189	116	1052	948	885	296	344	274	410	517	447
27.6667	2	1	1	1	1	2	4827	4972	4162	4444	3369	2466	19.1429	10.2857	18.8571	624.286	512.286	382.857		41.5	203	190	115	1053	953	893	295	345	270	418	513	448
27.8333	3	1	1	2	0	1	4851	4962	4157	4469	3360	2466	19.4286	11.4286	21.4286	619.714	536.286	412.571		41.75	210	200	123	1035	943	877	296	347	275	403	515	446
28	0	0	1	2	2	1	4817	4978	4154	4451	3354	2456	18.8571	10.8571	24	626.571	516.571	393.143		42	207	195	117	1049	943	874	297	337	279	411	506	443
28.1667	1	-2	2	0	0	2	4811	4953	4161	4453	3354	2450	18.2857	11.4286	25.1429	620	518.286	335.714		42.25	203	214	123	1046	943	885	290	342	280	415	514	443
28.3333	0	2	3	0	2	2	4815	4940	4166	4449	3336	2450	18.5714	12	27.7143	621.143	488	371.143		42.5	196	223	133	1042	953	885	291	340	276	406	507	438
28.5	0	1	2	0	1	0	4796	4919	4119	4415	3304	2453	18.5714	11.1429	31.4286	610.286	443.714	476		42.75	202	238	139	1029	936	884	284	340	288	402	506	441
28.6667	1	3	1	0	1	1	4794	4882	4123	4411	3328	2467	18.5714	11.4286	30.8571	617.429	389.143	441.143		43	198	228	137	1028	933	875	291	337	281	400	494	436
28.8333	0	0	0	0	-1	1	4802	4934	4129	4429	3304	2458	18.8571	11.4286	31.4286	601.714	353.143	337.429		43.25	194	226	138	1044	937	866	287	343	287	405	487	439
29	3	1	0	1	3	1	4825	4980	4144	4456	3317	2446	18	10.8571	32.8571	590.571	335.143	382.286		43.5	211	234	135	1031	953	868	286	348	280	395	489	444
29.1667	4	0	0	2	0	1	4850	4938	4154	4465	3325	2438	19.4286	11.1429	34	590.857	349.429	395.429		43.75	217	237	138	1040	933	876	290	335	280	390	488	439
29.3333	2	-1	1	1	1	1	4860	4967	4153	4421	3334	2454	19.7143	11.1429	32.8571	585.429	381.429	441.429		44	216	244	126	1039	945	864	277	329	294	398	495	432
29.5	1	1	2	0	3	1	4883	4960	4125	4465	3336	2446	19.1429	11.7143	32	574.857	392.857	439.143		44.25	218	252	126	1021	930	863	280	337	289	397	479	433
29.6667	0	1	1	-1	0	1	4862	4964	4122	4383	3334	2450	19.1429	11.7143	32.8571	579.714	386	317.714		44.5	218	260	135	1026	921	857	286	339	291	400	482	435
29.8333	0	-1	2	2	1	3	4869	4999	4187	4424	3344	2454	19.7143	11.4286	32.5714	575.714	377.143	365.143		44.75	219	274	144	1012	924	857	278	334	294	399	491	433
30	2	1	1	1	0	0	4903	4999	4157	4422	3342	2458	18.5714	10.8571	34.2857	574	353.429	398.286		45	223	284	142	1016	916	854	283	331	291	399	476	432
30.1667	1	0	1	1	1	2	4928	5003	4157	4423	3338	2452	19.1429	11.1429	35.1429	567.714	341.143	488.571		45.25	213	305	158	1022	917	851	279	338	304	398	476	440
30.3333	1	1	1	1	0	0	4912	4969	4131	4407	3347	2436	18.8571	11.1429	34	563.143	368.857	459.429		45.5	209	312	187	1017	918	862	283	333	298	401	481	432
30.5	1	0	2	1	2	2	4917	4984	4168	4391	3351	2433	19.4286	11.1429	34.5714	562.286	440.857	325.714		45.75	205	312	163	1019	920	858	271	331	301	401	481	426
30.6667	2	1	1	2	1	0	4875	4944	4111	4395	3309	2457	18.8571	11.1429	36.8571	553.429	511.143	321.429		46	208	312	167	1008	916	861	273	320	302	399	475	429
30.8333	1	0	1	1	1	0	4908	4962	4145	4384	3295	2441	19.7143	12.5714	38.5714	540.286	586.857	462		46.25	201	315	164	1015	912	861	268	325	300	398	475	426
31	2	-1	0	1	0	1	4853	4937	4081	4345	3308	2422	19.1429	10.8571	39.4286	527.714	682.571	478.286		46.5	197	307	146	1024	924	861	277	325	304	395	474	427
31.1667	1	2	0	2	2	2	4838	4935	4121	4363	3304	2442	20.5714	11.7143	42.2857	548	718.857	421.143		46.75	206	323	143	1013	916	849	271	324	302	394	475	426
31.3333	3	0	0	2	1	1	4849	4936	4105	4346	3254	2437	20.8571	11.1429	43.7143	542.571	741.714	315.714		47	220	336	150	1016	912	847	276	321	306	388	464	421
31.5	1	1	2	0	1	2	4878	4925	4080	4357	3263	2422	20	12	46	546	776	363.143		47.25	230	353	175	1016	918	851	280	317	308	381	473	424
31.6667	0	1	0	0	0	1	4859	4905	4097	4332	3244	2417	18.5714	11.1429	47.4286	528.857	788.857	383.714		47.5	234	360	171	1004	903	849	273	320	307	379	474	416
31.8333	1	0	1	1	2	1	4863	4955	4099	4330	3280	2426	20.2857	11.4286	51.4286	535.429	792.857	437.143		47.75	245	372	185	1011	914	851	270	323	305	384	469	417
32	0	1	2	1	1	2	4843	4957	4085	4353	3274	2419	20.5714	11.1429	50.8571	538.286	796.571	348		48	249	386	227	1017	908	847	277	318	313	381	473	428
32.1667	0	0	1	-1	1	1	4845	4948	4109	4333	3271	2435	20.8571	12	53.4286	538.286	774.857	352		48.25	258	391	207	1016	901	852	276	317	308	379	473	414
32.3333	2	0	0	2	1	1	4888	4966	4103	4303	3295	2450	19.1429	11.4286	52.5714	528	825.143	388.286		48.5	250	398	193	1004	904	839	268	321	307	379	467	419
32.5	1	0	0	2	0	-1	4913	5010	4118	4350	3286	2436	21.4286	11.1429	55.4286	521.143	802.857	387.714		48.75	234	400	186	998	896	833	280	309	316	365	476	418
32.6667	1	3	1	2	2	0	4918	5053	4100	4346	3285	2423	19.7143	11.1429	54	524.571	695.143	451.429		49	228	424	182	999	901	833	278	311	307	363	467	419
32.8333	2	1	0	3	2	1	4893	4970	4107	4377	3272	2449	19.7143	10.5714	54.2857	525.714	606.571	367.429		49.25	242	419	168	989	901	840	275	314	312	359	458	416
33	1	1	-1	1	0	0	4900	4997	4110	4380	3285	2429	19.7143	12	57.4286	510.571	618	349.429		49.5	246	423	174	990	905	827	277	316	312	355	456	412
33.1667	0	0	2	0	1	2	4879	4998	4131	4379	3277	2462	20.2857	11.7143	56.5714	511.429	499.714	445.714		49.75	244	434	185	985	899	826	277	311	312	358	467	416
33.3333	1	0	1	1	1	1	4909	5010	4123	4354	3254	2417	19.7143	11.4286	53.7143	506.571	427.714	436.571		50	238	449	192	991	897	827	271	315	312	358	457	419
33.5	0	1	1	0	0	1	4898	4999	4124	4357	3264	2436	20.8571	12	52.5714	501.429	415.429	405.714		50.25	228	456	186	990	892	835	282	312	316	359	456	402
33.6667	1	1	1	2	1	2	4906	4968	4111	4334	3243	2450	20.2857	11.7143	54.5714	498.286	408.286	437.429		50.5	238	466	191	983	901	836	283	309	321	355	457	410
33.8333	-1	1	1	1	2	1	4885	4987	4108	4343	3223	2424	19.7143	12	57.7143	502.286	388.857	350.286		50.75	261	474	190	982	902	826	274	315	311	350	465	412
34	0	1	-2	1	0	0	4866	5011	4071	4353	3233	2431	18.8571	11.1429	61.1429	508	350.286	307.143		51	294	486	197	979	895	839	278	309	309	347	450	415
34.1667	1	2	1	2	1	2	4874	4981	4082	4343	3228	2420	19.7143	11.7143	64.5714	495.143	362.857	405.714		51.25	309	490	198	975	884	819	273	319	313	342	447	408
34.3333	0	1	2	0	2	1	4854	4988	4098	4343	3205	2430	20.2857	11.7143	64	489.714	367.143	381.714		51.5	305	497	192	979	885	810	281	310	311	347	443	411
34.5	2	1	0	2	2	1	4824	4980	4092	4343	3221	2432	20	10.2857	66.8571	492.286	361.429	386.571		51.75	319	513	212	973	897	821	276	309	299	346	443	401
34.6667	0	0	1	2	1	0	4862	4983	4071	4300	3203	2404	21.7143	12.5714	69.7143	501.714	349.714	415.429		52	344	511	216	961	884	826	278	310	303	344	441	404
34.8333	0	0	1	0	0	1	4873	5008	4088	4316	3222	2414	21.1429	11.4286	73.4286	503.143	316	330.286		52.25	360	516	219	969	881	807	277	310	307	342	438	401
35	-1	-1	2	0	0	1	4878	4988	4046	4314	3196	2427	20.5714	12	71.7143	504	312.286	385.429		52.5	379	518	217	974	875	817	280	309	307	347	447	406
35.1667	0	-2	1	1	-1	1	4865	4971	4065	4291	3213	2423	21.1429	12.2857	71.1429	505.714	311.714	417.143		52.75	397	515	218	961	881	815	279	313	304	341	445	405
35.3333	1	1	2	1	2	0	4877	4977	4070	4281	3204	2415	22.2857	11.4286	70	502	325.429	387.143		53	389	521	226	975	875	799	280	314	301	341	444	402
35.5	1	0	0	1	1	0	4848	4963	4085	4309	3210	2442	22.5714	11.4286	70.2857	492.857	340	370.286		53.25	384	527	232	968	875	803	285	315	294	338	438	393
35.6667	2	0	2	3	-1	2	4911	5006	4059	4287	3199	2428	22	11.7143	70.2857	502	345.143	362		53.5	382	532	245	964	877	807	282	312	292	336	433	399
35.8333	1	1	1	1	0	0	4887	4988	4059	4305	3210	2439	22.2857	11.4286	69.4286	504	336.857	377.429		53.75	369	541	251	963	875	800	283	307	297	338	439	402
36	1	1	0	1	0	1	4890	4991	4085	4318	3212	2435	23.1429	10.8571	70	502.857	325.143	387.714		54	375	545	263	969	869	798	279	311	289	340	447	402
36.1667	1	1	1	2	1	1	4855	5015	4062	4310	3211	2451	22.8571	11.4286	69.7143	499.714	318.857	388.571		54.25	384	541	268	949	868	804	283	314	292	348	433	392
36.3333	1	0	1	1	0	1	4860	4992	4058	4290	3214	2443	23.4286	12.2857	72.2857	506	358.571	352.286		54.5	389	554	279	969	860	799	275	307	288	338	439	396
36.5	1	2	1	2	2	1	4920	5023	4082	4311	3223	2430	22.2857	10.8571	70.8571	506	411.714	398.286		54.75	423	559	297	957	863	794	279	310	289	347	438	405
36.6667	0	0	0	0	0	2	4877	4961	4061	4285	3196	2442	24	11.7143	72.2857	508.571	442	346		55	440	561	330	946	862	803	285	306	287	339	438	396
36.8333	2	2	1	1	1	0	4885	4986	4105	4295	3202	2447	23.1429	11.4286	71.7143	510.857	440	361.714		55.25	451	567	335	962	864	812	278	308	287	336	440	389
37	1	0	2	1	0	3	4887	4981	4056	4318	3209	2433	23.7143	11.4286	73.1429	510.286	455.714	378.857		55.5	481	571	324	951	873	806	280	303	276	340	441	394
37.1667	0	1	2	0	1	1	4885	4983	4023	4333	3205	2437	23.1429	11.7143	74.2857	512.571	482.571	404.571		55.75	476	568	325	953	864	794	279	309	269	342	440	393
37.3333	0	0	0	1	0	0	4831	4961	4049	4306	3193	2438	22.5714	11.7143	72.5714	510.571	529.714	350.571		56	489	578	336	941	857	788	275	307	273	341	447	395
37.5	1	-1	1	2	1	2	4874	4967	4031	4302	3202	2447	23.1429	11.4286	71.7143	522.286	589.143	345.143		56.25	501	572	351	934	864	794	274	311	270	337	454	399
37.6667	1	-1	1	1	0	2	4880	5005	4030	4361	3204	2439	24.8571	11.4286	72.2857	520.571	601.714	346		56.5	517	583	355	936	849	791	280	304	270	331	464	392
37.8333	1	0	0	2	1	2	4881	4978	4058	4337	3190	2426	25.1429	11.7143	74.2857	522.286	623.143	402.857		56.75	507	591	361	951	849	790	280	312	262	344	488	394
38	2	0	0	3	1	2	4853	4975	4057	4312	3208	2424	25.4286	12.2857	74.5714	516.571	619.143	407.143		57	504	606	381	943	855	795	278	308	260	333	501	391
38.1667	0	0	1	-1	0	0	4858	5021	4033	4302	3206	2409	26.8571	10.5714	74.5714	510.857	544.286	340.857		57.25	509	622	383	949	851	792	275	309	260	340	499	389
38.3333	1	-2	1	1	-1	1	4868	4989	4040	4320	3210	2404	27.1429	11.7143	74	497.143	423.143	350		57.5	497	621	398	943	839	782	283	305	258	330	501	402
38.5	2	1	2	1	1	2	4871	5017	4081	4329	3225	2404	26.8571	11.1429	74	500.286	370.286	328.857		57.75	513	630	394	940	850	788	280	307	253	333	516	391
38.6667	1	1	0	0	2	1	4872	4978	4042	4330	3214	2393	27.4286	10.5714	74.2857	483.429	329.714	378.286		58	514	647	397	938	856	793	277	309	258	327	522	391
38.8333	1	1	1	2	1	0	4855	5012	4064	4309	3222	2408	27.1429	11.4286	74.2857	477.429	283.143	371.714		58.25	526	646	404	938	863	786	279	297	248	335	537	387
39	0	0	1	0	1	1	4896	5020	4060	4322	3233	2429	25.7143	10.5714	74	469.429	266.286	324.571		58.5	526	684	392	938	852	788	270	308	256	334	542	384
39.1667	3	1	-1	2	1	0	4863	5012	4067	4333	3229	2415	28.2857	11.7143	78.8571	472	270.571	334.857		58.75	536	715	386	928	853	783	272	311	250	332	552	391
39.3333	1	0	1	1	1	1	4870	5027	4075	4309	3197	2409	29.7143	11.7143	80	472.286	272	330.857		59	555	758	389	943	849	787	269	302	251	329	554	396
39.5	3	1	2	2	-1	1	4887	4935	4047	4294	3192	2401	30	11.7143	82	468.857	286.286	348.571		59.25	547	785	417	928	842	785	269	309	252	331	563	390
39.6667	2	1	0	2	1	0	4861	4999	4078	4294	3193	2396	32.2857	12.2857	81.4286	464	270.571	388.571		59.5	570	816	441	932	842	783	275	301	253	324	562	390
39.8333	1	2	1	1	2	0	4844	4952	4060	4302	3213	2383	34	11.7143	80	458.857	268.286	325.429		59.75	575	843	451	938	853	782	272	310	244	327	560	388
40	2	1	1	1	2	1	4869	5008	4051	4287	3187	2404	32.8571	12	80.5714	461.714	278.857	330.286		60	574	867	495	938	841	786	265	305	246	324	573	395
40.1667	3	1	1	3	2	0	4855	4992	4074	4276	3204	2417	32.2857	11.7143	80.8571	464.286	275.429	358.286		60.25	598	881	513	934	858	786	266	308	249	323	567	383
40.3333	2	0	1	1	1	1	4848	4997	4064	4287	3197	2412	30.8571	12.2857	82.8571	471.714	277.429	302.571		60.5	609	879	520	933	839	796	266	304	244	328	573	388
40.5	0	1	3	1	1	1	4879	4984	4052	4276	3211	2417	30.8571	11.4286	80.5714	467.429	258.286	372.286		60.75	615	868	516	921	849	780	269	300	244	327	595	385
40.6667	2	1	1	1	0	3	4885	5011	4064	4310	3208	2383	31.1429	12.2857	82.8571	474	264.286	335.143		61	613	886	517	933	836	777	265	301	247	324	577	384
40.8333	0	0	2	1	1	2	4894	4988	4064	4330	3192	2398	30.2857	12.5714	82.2857	474	288.571	335.429		61.25	615	887	505	920	833	782	264	298	245	330	580	387
41	-1	1	1	-1	1	0	4862	4988	4079	4314	3214	2407	32	12.5714	83.4286	488.857	283.143	313.714		61.5	616	919	507	927	826	777	262	305	242	317	576	389
41.1667	1	0	1	1	2	1	4853	4985	4067	4285	3209	2379	33.4286	12.2857	84.2857	499.714	264.857	322		61.75	624	913	500	913	841	774	276	300	248	327	572	389
41.3333	2	1	0	2	1	1	4876	4983	4038	4280	3183	2393	33.1429	12.2857	82.8571	506.286	283.714	327.714		62	629	923	528	933	832	773	262	301	245	321	579	378
41.5	2	0	0	2	1	1	4875	4974	4072	4274	3192	2392	35.1429	12.8571	84.2857	494.857	274.857	313.714		62.25	629	923	552	923	838	767	265	306	248	325	583	383
41.6667	3	1	2	2	1	2	4828	4995	4046	4289	3175	2379	37.4286	12	82.5714	491.143	273.429	292.571		62.5	620	918	555	925	843	768	267	303	254	321	581	387
41.8333	3	0	0	4	2	2	4821	4956	4018	4257	3197	2360	36.2857	12.2857	82	478	277.429	327.714		62.75	614	923	574	917	835	770	259	305	249	321	583	381
42	4	-1	1	3	0	1	4860	4965	4051	4299	3187	2382	36	12	80.5714	470.571	264.857	349.143		63	611	915	592	929	841	784	263	300	246	321	573	383
42.1667	2	1	2	3	0	1	4846	4958	4068	4284	3193	2391	36	12.8571	81.4286	467.429	247.714	309.714		63.25	615	924	605	924	838	770	263	305	248	313	572	379
42.3333	1	1	2	2	1	1	4880	4987	4073	4261	3179	2396	37.1429	12.2857	80.5714	467.429	246.857	341.714		63.5	632	905	622	926	840	753	262	298	245	319	577	378
42.5	1	2	-1	1	1	-1	4864	4991	4057	4261	3164	2387	37.7143	12.8571	82.2857	456.571	236.571	305.143		63.75	620	888	629	915	834	761	262	299	252	313	567	389
42.6667	-1	-1	0	1	-1	0	4839	4985	4045	4269	3188	2397	39.7143	13.7143	80	446.286	236.571	286.571		64	631	878	608	914	838	761	258	303	249	322	576	380
42.8333	1	2	2	1	1	1	4838	4985	4059	4291	3189	2385	40	14	81.4286	454	233.429	298.857		64.25	642	860	591	905	824	758	258	301	249	314	580	383
43	1	-1	-1	2	1	0	4826	4947	4049	4242	3192	2389	40.5714	13.1429	81.1429	465.714	227.143	286		64.5	649	848	615	917	831	772	262	296	246	321	574	380
43.1667	1	0	1	1	2	0	4843	4948	4065	4247	3167	2398	40	13.7143	82	468.286	219.429	302.286		64.75	660	868	618	927	829	765	258	305	249	312	580	384
43.3333	0	0	1	0	0	1	4888	4993	4049	4256	3192	2383	40.8571	14.2857	81.1429	471.143	214.857	315.143		65	661	879	647	907	828	776	263	300	252	313	590	372
43.5	1	0	0	1	-1	0	4897	5008	4026	4259	3206	2356	39.7143	14.8571	82	465.714	212.286	352.857		65.25	655	870	654	916	819	756	259	304	245	311	592	374
43.6667	0	1	0	0	2	1	4857	5005	4042	4246	3205	2376	40.5714	14.8571	84.5714	463.714	216.571	340.857		65.5	666	876	677	916	829	766	264	301	246	311	571	370
43.8333	0	0	0	1	0	-1	4837	4993	4021	4226	3186	2353	41.1429	14.2857	82	468	216.857	317.143		65.75	664	885	709	912	850	761	267	305	251	309	574	378
44	2	0	0	2	1	1	4837	4955	4060	4246	3176	2358	41.7143	14.5714	82	460.286	222	273.714		66	675	898	708	901	828	763	255	298	248	311	577	370
44.1667	2	-1	0	2	1	1	4837	4970	4031	4215	3168	2375	44.5714	14.8571	84	454.857	232.286	287.143		66.25	678	902	696	904	827	763	257	305	247	314	574	375
44.3333	1	2	2	1	3	3	4870	4965	4034	4193	3155	2362	44.2857	14.5714	82.5714	447.143	230	295.143		66.5	673	895	674	902	818	768	254	298	243	309	590	375
44.5	2	0	1	1	0	1	4827	4968	4054	4205	3169	2369	44.5714	16.2857	80.5714	446.857	226	349.143		66.75	681	904	662	919	821	753	258	307	246	312	578	373
44.6667	1	0	2	1	1	2	4866	4964	4071	4207	3165	2380	46.8571	16.5714	80.2857	441.429	216.571	334		67	687	889	672	894	829	758	257	296	247	309	586	368
44.8333	2	1	2	2	2	3	4841	4941	4083	4208	3172	2363	48.2857	16	80.5714	436.857	224.571	277.429		67.25	684	896	673	908	823	755	258	299	248	314	573	372
45	0	1	0	1	3	1	4857	4958	4055	4202	3142	2387	48.8571	17.1429	78.5714	440.571	230.286	274		67.5	687	884	710	898	825	764	255	303	252	306	584	369
45.1667	1	0	1	3	3	0	4879	4973	4041	4200	3174	2399	50.2857	16.8571	77.1429	438.286	246.857	300		67.75	682	879	758	913	812	758	252	301	245	301	576	365
45.3333	1	-1	0	2	-1	2	4886	4970	4020	4207	3164	2377	52.2857	17.4286	76.8571	438.571	247.429	345.143		68	680	890	818	895	812	744	252	299	247	299	581	368
45.5	1	2	2	3	2	3	4875	4955	4039	4208	3140	2420	55.1429	17.7143	78	449.714	261.429	370.857		68.25	685	885	833	889	801	755	258	303	246	303	585	371
45.6667	2	0	0	2	0	1	4897	4970	4039	4188	3170	2392	55.1429	17.1429	74.2857	460.571	280.857	314.286		68.5	687	886	764	894	822	751	259	295	243	301	575	371
45.8333	1	2	0	0	2	1	4820	4968	4012	4169	3165	2406	55.4286	18.8571	74	468.571	269.714	272		68.75	700	889	706	900	818	756	254	296	246	300	562	364
46	1	1	1	1	1	0	4842	4971	4064	4162	3160	2361	55.7143	18.5714	72.2857	481.143	269.714	260.857		69	692	889	677	891	804	744	249	297	243	301	576	363
46.1667	1	-1	1	1	0	1	4866	4994	4038	4172	3158	2365	58	19.1429	74.5714	480.571	270	316		69.25	701	909	689	897	811	737	254	301	247	290	563	367
46.3333	1	0	1	1	0	2	4868	4991	4007	4152	3124	2384	60.2857	19.7143	74.5714	490.571	264.571	349.429		69.5	689	906	702	887	822	746	251	290	248	298	568	363
46.5	1	0	2	2	0	2	4860	4978	4067	4182	3196	2388	64.2857	18.8571	71.7143	495.714	265.143	375.714		69.75	688	896	727	887	809	756	250	300	245	289	564	357
46.6667	0	2	0	0	3	1	4872	4987	4065	4176	3179	2383	64.2857	19.1429	72.8571	519.143	250	312.857		70	689	907	757	884	818	749	244	295	240	292	564	362
46.8333	1	1	1	1	2	1	4903	4967	4047	4186	3172	2399	65.4286	19.4286	72	529.143	258.857	298.571		70.25	682	914	786	888	809	744	247	299	235	302	559	359
47	3	1	0	3	0	0	4857	4983	4067	4209	3192	2394	65.1429	20.5714	72.8571	554.286	252.286	279.429		70.5	690	914	794	873	817	744	250	293	238	295	553	368
47.1667	1	1	2	1	1	1	4886	4983	4050	4184	3180	2401	66.2857	21.1429	74.8571	560.857	240.571	314.286		70.75	698	919	813	877	807	738	247	295	244	293	567	357
47.3333	2	1	1	1	1	2	4856	5004	4030	4174	3152	2394	64.2857	20.5714	72.8571	548	232	380		71	697	919	811	876	806	739	243	297	241	300	554	364
47.5	0	1	0	-1	2	1	4842	4993	4054	4187	3167	2388	66.2857	22	73.4286	544.286	232	390.571		71.25	689	930	830	890	795	742	249	296	235	294	564	365
47.6667	2	2	1	1	1	0	4822	5003	3995	4160	3122	2360	66.5714	22.2857	74.2857	543.143	226.286	388.857		71.5	698	915	815	889	805	743	247	289	239	292	564	356
47.8333	2	-1	2	2	0	2	4841	4996	4002	4129	3144	2363	67.1429	21.4286	73.4286	538.571	219.714	268.286		71.75	692	910	757	888	804	743	239	294	240	296	563	361
48	1	0	2	1	1	2	4815	4978	3977	4158	3109	2369	70	21.7143	72.5714	532	219.143	290.286		72	705	904	735	877	801	740	250	292	236	293	554	366
48.1667	0	0	-1	-1	-1	1	4835	4959	4002	4125	3116	2364	70.5714	22	73.7143	527.429	216.857	333.143
48.3333	2	1	2	2	0	1	4851	4961	3974	4152	3138	2365	70.2857	21.7143	73.4286	534.286	207.143	414.857
48.5	3	1	2	3	1	3	4869	4975	4036	4140	3129	2395	72.2857	20.2857	73.7143	537.714	201.429	413.714
48.6667	1	1	1	0	1	1	4839	4979	3993	4161	3130	2370	74.5714	23.1429	73.1429	536.571	198	337.429
48.8333	3	0	1	3	1	1	4833	4969	4006	4167	3134	2363	72	22.2857	72.2857	538.571	194.571	283.429
49	2	1	0	2	1	0	4854	4953	4017	4183	3139	2388	74.5714	24.2857	76	530.286	199.429	285.714
49.1667	2	2	1	1	0	0	4857	4996	3994	4173	3123	2361	73.7143	24.5714	72.2857	535.143	200	345.143
49.3333	1	1	2	2	1	1	4839	4972	4009	4192	3133	2368	75.1429	25.4286	73.4286	539.143	203.714	398
49.5	2	-1	0	2	-1	1	4850	4964	4016	4178	3147	2373	75.1429	27.1429	76	538.857	208	372
49.6667	3	0	0	1	1	1	4867	4993	4010	4173	3128	2368	74	26.8571	75.4286	544.571	211.429	312
49.8333	1	1	3	2	1	2	4857	5008	4046	4157	3167	2401	72.8571	26.5714	75.4286	537.143	204.857	280.286
50	1	0	-1	0	1	1	4873	4984	4045	4176	3153	2416	70.8571	25.7143	75.4286	521.429	204	275.714
50.1667	0	3	1	0	3	1	4872	4967	4027	4159	3152	2378	68	24.2857	75.4286	505.429	208.571	331.714
50.3333	1	1	0	0	1	0	4869	4972	4011	4168	3147	2380	61.1429	25.1429	74.2857	508	209.143	359.143
50.5	1	1	2	0	1	2	4852	4989	3996	4161	3152	2359	57.4286	24.5714	76.8571	494.286	218	359.714
50.6667	2	1	2	2	0	1	4860	4970	3973	4144	3150	2361	58.2857	24.5714	76.2857	489.714	216	329.143
50.8333	2	0	0	3	1	1	4833	4972	3989	4150	3146	2369	58.2857	23.4286	76.8571	492.286	223.429	274
51	2	1	2	1	0	1	4831	4951	4001	4139	3159	2382	60.8571	24	74.5714	489.429	224.571	317.714
51.1667	3	1	2	2	2	1	4844	4924	3975	4148	3134	2386	62.8571	24.2857	77.7143	488.571	223.143	355.143
51.3333	2	1	1	1	1	3	4844	4942	3977	4157	3148	2372	60.2857	24.8571	75.7143	487.714	230.286	340.286
51.5	0	2	1	1	-1	1	4825	4929	3986	4123	3147	2355	60	23.4286	76	481.714	230.857	328.286
51.6667	2	0	1	1	0	1	4811	4900	3967	4153	3136	2382	58.8571	23.1429	74.8571	482	218.571	287.429
51.8333	2	1	0	2	2	1	4832	4905	3985	4137	3093	2370	60.2857	24.5714	75.7143	484.857	227.429	283.714
52	1	1	-1	1	0	0	4827	4928	3976	4107	3112	2374	61.7143	24.8571	77.4286	478.857	250.571	339.714
52.1667	2	1	3	1	2	2	4813	4914	3949	4096	3110	2360	62	26	74.8571	486	270.286	368.571
52.3333	2	2	1	1	1	0	4802	4887	3961	4102	3116	2341	68.5714	24.2857	75.4286	481.143	305.429	323.714
52.5	1	-1	1	1	0	2	4803	4877	3985	4105	3116	2350	78.8571	24.2857	73.4286	482.286	342.286	299.714
52.6667	2	1	0	3	1	0	4786	4880	3974	4094	3140	2333	92.5714	23.7143	75.4286	475.714	363.714	297.714
52.8333	4	2	1	1	2	1	4779	4867	3959	4069	3122	2345	88.2857	24.2857	75.1429	473.143	328.286	348.571
53	1	1	2	1	1	1	4853	4894	3963	4102	3137	2320	92.8571	23.1429	73.1429	471.714	311.143	326.571
53.1667	3	0	0	4	3	1	4802	4859	3969	4094	3119	2330	92	23.4286	73.1429	462	292.571	305.429
53.3333	0	1	1	1	0	1	4821	4866	3951	4097	3124	2360	94.5714	22.5714	72	462.286	310.571	278.286
53.5	2	1	1	3	1	0	4800	4872	3970	4082	3119	2323	96	23.7143	71.7143	459.714	316	276.857
53.6667	2	1	0	2	2	1	4780	4876	3960	4089	3115	2319	96	23.7143	74.2857	458.571	324.857	343.714
53.8333	1	0	1	1	0	1	4791	4882	3959	4107	3108	2331	104.571	22.8571	71.7143	450.571	313.714	388.857
54	2	-1	2	2	1	1	4816	4865	3968	4091	3107	2328	108.571	22.2857	74	455.429	322.857	324.857
54.1667	2	1	2	2	2	3	4788	4855	3947	4086	3117	2344	110.286	22.8571	72.8571	461.143	350.857	273.429
54.3333	2	1	1	3	2	2	4785	4849	3946	4089	3109	2331	106	23.4286	71.4286	456	347.143	264
54.5	2	0	1	3	1	3	4779	4846	3949	4095	3102	2322	97.7143	22.5714	73.1429	449.429	314.857	327.143
54.6667	0	-1	1	1	0	1	4800	4865	3936	4100	3101	2308	91.4286	23.4286	71.4286	439.429	267.714	366.857
54.8333	0	1	0	2	2	0	4779	4835	3966	4089	3104	2334	99.1429	23.4286	71.1429	438.286	239.714	337.714
55	1	0	1	1	0	2	4793	4840	3976	4091	3093	2350	105.714	24	69.1429	434	230.286	314.286
55.1667	2	1	2	0	0	1	4788	4806	3946	4090	3111	2342	110.857	25.1429	70.2857	440	221.143	271.429
55.3333	2	2	0	2	1	1	4794	4840	3955	4106	3129	2314	121.429	26.8571	69.7143	439.143	216.857	290.286
55.5	1	2	1	2	2	0	4790	4836	3959	4070	3120	2311	115.143	27.1429	70.5714	441.143	221.714	332.286
55.6667	1	1	1	1	1	1	4760	4841	3960	4101	3090	2325	109.714	27.4286	70.2857	441.143	229.143	317.143
55.8333	1	2	2	1	1	1	4786	4834	3942	4089	3098	2324	102.571	31.4286	70.8571	438.857	233.143	315.143
56	1	0	2	1	0	0	4775	4804	3960	4087	3073	2357	104.857	31.4286	69.7143	446.286	237.429	267.143
56.1667	0	0	1	1	0	1	4810	4800	3977	4068	3118	2334	110.286	30.8571	70.2857	439.143	241.143	260.571
56.3333	1	2	1	2	2	0	4802	4824	3960	4076	3103	2338	115.143	31.7143	68.2857	444.286	252.571	329.714
56.5	0	0	3	1	0	1	4791	4834	3965	4088	3088	2334	110.571	31.7143	69.7143	438	265.429	325.429
56.6667	1	2	1	2	1	0	4780	4845	3951	4126	3121	2328	111.429	30.5714	69.1429	432.571	280.571	332.286
56.8333	1	1	2	2	1	3	4807	4809	3963	4089	3099	2351	114.286	30.8571	70	432.286	285.714	282.571
57	2	2	-1	1	2	0	4762	4810	3948	4111	3073	2341	117.714	31.1429	70.8571	424	286.857	252.857
57.1667	1	1	1	1	2	1	4779	4824	3965	4096	3113	2326	116	30.5714	70.2857	423.714	288.857	334
57.3333	2	1	3	2	1	1	4801	4831	3958	4148	3087	2342	116	29.4286	70.8571	424.857	279.714	324.286
57.5	1	1	2	1	1	2	4763	4825	3956	4109	3106	2348	118.571	30.8571	71.4286	425.143	271.714	343.429
57.6667	1	1	1	0	1	0	4783	4820	3965	4089	3082	2326	122.286	30.8571	71.4286	417.143	236	278.286
57.8333	0	0	2	0	0	2	4781	4817	3946	4095	3087	2326	119.714	31.1429	71.4286	406.857	229.714	254.286
58	3	0	1	3	0	0	4771	4807	3935	4083	3070	2339	120.571	31.7143	73.4286	389.429	232.857	303.429
58.1667	2	1	2	0	1	2	4773	4809	3929	4088	3084	2344	118.857	30.5714	73.1429	375.143	237.143	304.571
58.3333	2	0	1	2	2	1	4778	4781	3949	4070	3059	2338	113.714	31.4286	74.2857	370.857	246.571	314.286
58.5	2	0	1	1	1	1	4786	4820	3941	4124	3069	2338	111.143	30.5714	78.5714	358.571	256.286	298.857
58.6667	0	1	2	1	3	2	4777	4790	3929	4124	3073	2344	113.143	31.7143	82.2857	339.143	277.429	310.857
58.8333	0	1	2	0	1	2	4760	4810	3941	4116	3058	2345	118	32	85.1429	324.571	289.143	258.857
59	2	0	-1	1	1	0	4761	4835	3950	4124	3051	2321	120	31.4286	85.4286	323.143	307.714	293.429
59.1667	0	0	0	1	0	1	4763	4832	3930	4111	3068	2335	123.714	33.7143	87.1429	324.571	309.714	318
59.3333	1	2	1	0	0	1	4773	4802	3939	4114	3058	2315	118.286	32.8571	85.7143	325.429	317.429	326
59.5	1	1	0	1	-1	0	4764	4788	3939	4112	3053	2333	117.143	31.7143	90.2857	328.571	315.429	276.286
59.6667	1	0	1	1	-1	1	4770	4791	3926	4107	3044	2336	116.286	33.4286	89.1429	328.571	309.143	295.714
59.8333	2	1	0	3	1	2	4774	4756	3935	4109	3056	2327	118.286	33.1429	92	339.429	277.714	266
60	0	0	2	1	0	2	4756	4764	3912	4092	3069	2323	115.143	32	89.4286	333.143	259.143	282.857
60.1667	0	0	1	1	0	1	4778	4770	3942	4095	3083	2334	118.857	31.7143	90	334	267.143	316.571
60.3333	1	2	1	3	2	1	4782	4752	3945	4113	3074	2338	109.714	32	92.8571	333.143	258.571	296.571
60.5	2	0	0	3	1	1	4796	4774	3972	4069	3075	2327	109.143	34.5714	96	331.429	252.286	276.571
60.6667	3	0	1	2	-1	1	4791	4770	3931	4097	3052	2330	106.286	35.1429	91.7143	327.714	237.714	323.714
60.8333	1	2	1	0	1	1	4772	4766	3922	4107	3065	2313	106.857	37.7143	92.5714	338	220.857	284.857
61	1	1	-1	1	0	0	4779	4728	3951	4117	3035	2326	107.429	37.4286	92.2857	335.143	210.571	272.857
61.1667	3	0	2	3	1	1	4792	4778	3926	4101	3044	2349	106.857	38.2857	93.7143	330.857	211.143	290.286
61.3333	2	1	-1	2	0	1	4769	4770	3970	4104	3027	2321	106.571	41.1429	95.4286	332.286	208.286	286.286
61.5	2	0	2	2	0	1	4782	4827	3930	4085	3060	2344	106.857	42.2857	94.8571	338.286	200.857	306.571
61.6667	1	0	0	0	0	0	4776	4844	3954	4082	3037	2322	105.143	43.1429	94	340.571	192	312.857
61.8333	1	-1	-1	1	0	1	4792	4827	3957	4083	3030	2313	106.286	42.5714	93.7143	345.714	193.714	259.143
62	0	0	1	2	0	2	4787	4812	3945	4086	3037	2310	107.143	43.4286	95.7143	349.714	193.429	282.857
62.1667	2	2	1	1	2	1	4804	4856	3966	4091	3023	2336	106	43.4286	94.8571	363.143	206.571	311.429
62.3333	2	0	2	0	0	3	4809	4833	3938	4077	3016	2329	106.571	45.1429	96	379.429	213.429	296.857
62.5	1	0	2	2	2	1	4795	4818	3957	4070	3021	2323	106.286	43.4286	94.2857	398	212.857	260
62.6667	1	1	2	3	0	1	4817	4856	3974	4090	3012	2339	103.429	44.8571	95.1429	413.429	219.429	242
62.8333	0	1	1	2	1	1	4822	4825	3941	4073	3036	2325	103.429	43.7143	96.5714	426.286	218.286	262
63	1	1	1	2	0	1	4763	4819	3943	4088	2993	2328	102.571	44.8571	96.5714	433.714	227.714	303.143
63.1667	1	1	-1	1	1	1	4775	4826	3949	4055	3018	2311	103.429	46.8571	97.1429	431.429	239.714	319.143
63.3333	4	-1	1	4	1	1	4787	4825	3954	4072	2992	2310	104	48	95.1429	426.286	260	304.857
63.5	2	0	2	2	2	1	4784	4823	3947	4076	3005	2335	104.571	48.2857	95.4286	420	308.857	300.571
63.6667	2	1	2	0	1	1	4785	4845	3938	4083	3027	2320	105.143	48.8571	94	425.143	345.143	263.429
63.8333	2	2	2	2	2	0	4792	4818	3946	4073	3008	2324	103.714	49.1429	94.8571	430.571	361.143	249.714
64	0	2	0	2	1	1	4778	4813	3952	4053	2980	2329	103.714	48.8571	95.1429	430.857	381.143	310.286
64.1667	0	1	2	2	1	1	4769	4819	3941	4058	3002	2319	102	49.7143	97.1429	437.714	388.857	379.429
64.3333	2	1	2	3	1	1	4781	4812	3935	4063	3021	2317	100.857	50.5714	96	449.714	387.143	358
64.5	2	1	1	3	2	1	4784	4822	3917	4061	3007	2314	100.857	52.2857	96.8571	460.857	375.714	306.286
64.6667	1	3	1	0	1	0	4787	4828	3950	4075	2979	2319	101.143	50.8571	95.7143	503.143	367.143	278
64.8333	1	1	1	2	2	0	4755	4833	3952	4052	2978	2332	98.8571	50.8571	94.8571	548.286	364.286	245.714
65	0	2	2	1	2	2	4765	4830	3921	4047	2980	2331	96	51.1429	95.4286	595.429	371.429	254.857
65.1667	3	1	1	2	1	0	4778	4830	3936	4057	3006	2332	97.7143	51.1429	93.7143	639.429	374.286	320.571
65.3333	1	2	0	5	1	0	4797	4816	3921	4021	2985	2333	96.8571	52.5714	91.4286	677.714	362.571	334.571
65.5	2	1	0	2	1	1	4766	4831	3902	4031	2965	2328	94.2857	52.5714	89.7143	695.714	354.857	279.714
65.6667	1	1	2	2	2	1	4776	4801	3925	4038	2972	2323	94.2857	53.1429	91.4286	707.143	330.571	246
65.8333	1	1	2	2	1	3	4742	4814	3935	4039	2986	2326	90.5714	52	92.2857	718.857	310.571	267.429
66	2	1	1	1	2	0	4784	4802	3934	4036	2975	2325	90.8571	51.1429	89.1429	726.571	312.571	301.429
66.1667	2	0	0	3	0	0	4768	4803	3939	4031	3003	2359	92.5714	51.4286	90.2857	717.714	310.857	336.571
66.3333	1	1	1	2	1	1	4758	4813	3929	4036	2977	2328	90.2857	50.5714	90	725.714	302.571	346.857
66.5	2	1	1	2	1	2	4810	4863	3942	4082	2992	2334	88.2857	52.2857	89.4286	741.143	282.857	284.286
66.6667	2	-1	1	0	1	2	4816	4862	3915	4056	3011	2316	89.7143	51.7143	90.8571	742.857	277.429	240.857
66.8333	3	0	1	2	2	2	4791	4850	3943	4057	2996	2353	88.2857	49.7143	87.1429	748.857	277.429	258.286
67	3	0	0	2	2	0	4797	4874	3918	4054	3008	2321	88.2857	49.7143	86.8571	755.714	270.857	301.429
67.1667	1	0	1	2	1	3	4781	4837	3928	4046	3005	2323	87.4286	49.7143	88.5714	761.714	238.857	310
67.3333	2	0	0	1	2	0	4812	4860	3966	4056	3004	2330	85.7143	48.8571	86.8571	767.714	223.429	327.429
67.5	2	0	1	1	1	2	4789	4850	3948	4051	3018	2343	85.1429	47.4286	88.5714	783.429	215.429	275.714
67.6667	0	0	1	0	1	1	4818	4867	3956	4047	2999	2324	84.5714	46.5714	86.8571	797.429	215.714	260
67.8333	2	1	1	2	1	2	4782	4871	3944	4049	3018	2352	84.2857	47.7143	89.4286	813.429	216.571	275.714
68	1	2	0	2	2	0	4804	4873	3958	4025	3008	2338	83.7143	48.5714	86	829.143	229.143	286.571
68.1667	1	1	3	1	1	2	4804	4888	3952	4049	3014	2322	85.1429	48.8571	84.5714	848.571	234.571	316
68.3333	2	2	1	1	2	2	4818	4855	3959	4063	2995	2333	83.7143	47.4286	81.4286	856.857	233.714	311.143
68.5	1	3	0	2	2	1	4783	4857	3946	4067	3012	2316	82.8571	47.7143	83.1429	861.429	239.429	322.571
68.6667	1	1	1	2	2	0	4785	4864	3955	4063	2995	2327	82.5714	48.2857	83.1429	854.857	246.571	280.286
68.8333	1	0	1	2	2	1	4810	4867	3945	4055	3013	2329	83.4286	47.4286	82.2857	843.429	247.143	282.857
69	0	0	1	1	1	1	4804	4852	3948	4074	2994	2316	81.7143	49.1429	81.4286	812	250	278
69.1667	1	2	2	2	2	1	4796	4895	3932	4066	3007	2314	82.8571	48.5714	82.8571	784.571	252.857	274.571
69.3333	0	1	2	2	0	1	4809	4868	3939	4056	3002	2318	82.5714	48.2857	82.2857	733.429	247.429	296.286
69.5	0	1	0	0	1	0	4791	4850	3946	4069	3023	2318	82.8571	46	81.7143	675.143	244.286	289.714
69.6667	3	0	2	2	2	1	4779	4870	3939	4041	3006	2334	83.7143	46.5714	80.8571	598.857	245.714	305.714
69.8333	3	1	1	1	0	2	4813	4886	3944	4052	3016	2298	82.8571	45.7143	84.2857	561.143	253.429	300.286
70	1	2	1	2	1	2	4791	4853	3969	4055	2976	2334	82.2857	45.1429	82	529.429	248.857	284
70.1667	3	2	-1	1	1	1	4812	4887	3955	4067	2991	2354	83.1429	45.1429	81.7143	508.286	246.571	284.571
70.3333	2	0	1	1	0	1	4849	4902	3984	4097	3004	2352	82.2857	45.1429	82.5714	486.857	242.857	278.286
70.5	2	1	2	1	2	1	4837	4875	3995	4106	3007	2338	83.1429	44	80.8571	477.429	227.429	328.286
70.6667	1	0	1	2	1	1	4812	4917	3965	4081	3026	2326	81.7143	44.8571	80.5714	441.429	223.714	291.429
70.8333	1	1	1	1	1	0	4857	4907	3962	4080	3004	2334	81.1429	44.8571	81.1429	403.714	216	274
71	2	1	0	2	2	0	4834	4863	3930	4067	2986	2287	82.5714	46	79.1429	377.429	212.857	272.571
71.1667	1	0	2	1	2	2	4778	4830	3953	4060	2987	2312	80.8571	43.1429	78.5714	385.714	214.286	267.143
71.3333	3	0	-1	2	0	0	4771	4836	3920	4049	2981	2305	80.5714	43.7143	81.1429	400	216.286	273.429
71.5	3	2	3	1	1	2	4753	4792	3889	4033	2977	2304	80.5714	46.5714	80	417.429	207.429	312
71.6667	1	3	1	2	2	2	4747	4821	3920	4060	2959	2310	80.5714	45.1429	76.8571	430.571	204	311.429
71.8333	3	1	2	2	0	2	4762	4833	3959	4050	2972	2298	80.2857	45.7143	75.7143	444	200.857	290.571
72	1	2	2	3	1	1	4756	4823	3921	4029	2970	2307	80.5714	48.2857	74.5714	447.714	198.571	272

## Sheet: Fig4a
Time Elapsed (hours)	S320F/I328S 295-330			S320F 295-330			WT 295-330
0	27	47	36	119	110	16	19	20	18
0.25	26	46	39	435	446	274	21	17	19
0.5	33	50	43	737	966	670	22	19	18
0.75	33	53	43	1168	1205	899	24	22	23
1	34	58	47	1480	1557	964	26	23	21
1.25	35	61	47	1680	1688	1201	28	26	22
1.5	41	55	46	1831	1802	1414	27	26	26
1.75	39	57	45	2017	1889	1469	26	25	25
2	40	53	46	2137	1881	1545	29	29	25
2.25	35	51	39	2191	2141	1554	28	27	25
2.5	34	52	39	2218	2149	1517	33	29	28
2.75	33	49	38	2417	2183	1620	30	32	27
3	29	48	36	2319	2031	1607	32	30	29
3.25	33	45	42	2351	2089	1555	40	33	30
3.5	28	41	39	2513	2233	1595	41	37	34
3.75	30	44	37	2491	2399	1653	45	45	35
4	27	41	37	2475	2547	1598	49	48	38
4.25	25	46	34	2456	2727	1579	57	46	43
4.5	25	41	33	2423	2610	1562	59	60	43
4.75	23	41	31	2431	2400	1566	62	57	46
5	23	43	34	2387	2384	1565	65	64	51
5.25	27	43	33	2405	2379	1580	66	61	56
5.5	30	39	38	2459	2383	1571	66	64	60
5.75	25	42	35	2443	2407	1538	71	63	64
6	24	45	32	2461	2393	1522	67	66	62
6.25	29	44	34	2435	2406	1543	69	65	65
6.5	26	48	39	2448	2391	1548	70	68	65
6.75	27	43	37	2457	2414	1512	71	66	67
7	32	46	35	2439	2403	1543	68	66	63
7.25	32	44	39	2434	2386	1543	68	67	67
7.5	35	47	39	2440	2399	1536	73	69	67
7.75	30	48	37	2441	2420	1532	70	71	66
8	38	50	39	2435	2431	1507	71	66	69
8.25	34	50	41	2445	2441	1519	76	69	69
8.5	37	55	47	2436	2420	1535	70	69	72
8.75	38	54	48	2434	2468	1524	69	72	69
9	41	58	46	2439	2430	1526	74	72	72
9.25	46	70	46	2437	2436	1509	77	69	70
9.5	37	67	52	2423	2422	1503	72	72	72
9.75	41	85	55	2430	2419	1525	75	76	68
10	42	108	64	2423	2440	1516	71	72	70
10.25	48	124	69	2447	2440	1521	78	73	70
10.5	53	149	98	2454	2344	1535	77	73	68
10.75	67	137	113	2464	2360	1533	72	76	70
11	79	157	120	2467	2339	1500	77	79	68
11.25	90	165	119	2481	2354	1493	78	79	73
11.5	90	159	132	2444	2339	1530	76	77	75
11.75	90	173	143	2472	2330	1521	75	78	76
12	100	179	154	2442	2350	1527	75	83	75
12.25	117	191	165	2421	2335	1514	77	81	73
12.5	147	231	213	2357	2321	1496	77	82	76
12.75	153	257	273	2482	2257	1533	76	84	77
13	175	277	288	2714	2286	1513	82	80	75
13.25	174	304	309	2633	2159	1501	79	84	76
13.5	171	358	308	2340	2156	1524	75	83	78
13.75	200	265	300	2373	2144	1530	81	85	77
14	196	312	253	2378	2163	1526	75	83	78
14.25	224	301	189	2438	2138	1534	78	85	75
14.5	250	319	227	2352	2135	1540	81	81	80
14.75	267	314	219	2355	2142	1523	85	82	81
15	245	351	247	2353	2119	1509	83	81	78
15.25	309	339	315	2371	2131	1529	84	85	81
15.5	319	280	287	2292	2137	1502	84	89	79
15.75	305	275	290	2325	2133	1514	81	85	80
16	233	333	274	2321	2118	1498	86	87	81
16.25	214	397	276	2317	2113	1525	84	87	78
16.5	215	312	278	2356	2126	1533	85	92	79
16.75	234	267	286	2317	2102	1520	85	90	78
17	252	271	271	2317	2136	1515	89	91	81
17.25	255	270	270	2321	2138	1502	90	96	82
17.5	256	293	261	2395	2101	1517	90	99	85
17.75	260	313	265	2338	2093	1504	95	107	84
18	259	314	269	2343	2097	1496	97	102	86
18.25	243	303	266	2351	2108	1504	98	108	83
18.5	246	313	267	2345	2085	1495	101	112	84
18.75	246	303	265	2333	2084	1500	96	115	91
19	252	307	258	2336	2093	1471	97	114	91
19.25	250	316	262	2323	2098	1496	95	115	87
19.5	246	314	247	2316	2093	1478	96	113	90
19.75	254	311	240	2304	2104	1493	97	108	95
20	253	319	237	2290	2067	1483	98	107	96
20.25	258	313	257	2312	2073	1463	97	108	97
20.5	257	306	262	2295	2076	1473	97	104	93
20.75	242	310	258	2309	2092	1475	97	107	91
21	243	309	246	2309	2084	1474	103	109	92
21.25	238	304	249	2326	2085	1475	106	113	95
21.5	246	307	242	2318	2076	1465	106	110	95
21.75	243	302	240	2319	2073	1480	105	108	92
22	240	300	234	2298	2042	1490	100	114	90
22.25	248	303	228	2312	2078	1478	104	110	95
22.5	242	303	234	2318	2070	1454	100	108	89
22.75	240	302	235	2289	2078	1470	105	107	93
23	240	308	230	2326	2044	1464	102	112	91
23.25	251	297	234	2286	2056	1471	101	115	95
23.5	243	307	238	2294	2087	1432	104	113	94
23.75	245	302	245	2294	2106	1451	104	108	93
24	255	301	256	2300	2098	1460	101	109	92
24.25	259	301	246	2300	2122	1453	100	110	93
24.5	261	300	245	2288	2064	1453	109	134	97
24.75	258	301	263	2292	2017	1439	127	140	101
25	274	305	251	2303	2129	1433	157	158	100
25.25	269	305	251	2306	2061	1436	175	191	107
25.5	268	306	251	2310	2057	1430	176	156	103
25.75	268	299	250	2292	2086	1425	189	133	104
26	268	309	248	2311	1941	1432	187	129	109
26.25	270	304	247	2282	1914	1436	183	132	108
26.5	275	305	245	2295	1915	1427	176	131	104
26.75	273	311	251	2301	1911	1426	180	122	117
27	272	311	248	2282	1870	1435	147	112	129
27.25	276	311	246	2281	1870	1423	195	114	140
27.5	268	313	253	2273	1873	1391	159	124	146
27.75	261	306	248	2275	1902	1401	157	117	157
28	265	309	251	2278	1866	1398	164	120	151
28.25	264	307	245	2263	1777	1419	158	123	153
28.5	269	313	243	2272	1794	1409	162	126	143
28.75	273	308	249	2251	1791	1413	145	134	121
29	261	313	243	2261	1779	1398	169	159	106
29.25	281	311	232	2256	1780	1388	202	173	123
29.5	286	311	231	2265	1774	1397	200	167	143
29.75	284	305	226	2223	1740	1394	157	195	158
30	276	305	219	2254	1727	1400	164	152	151
30.25	274	297	221	2269	1736	1382	171	130	143
30.5	278	298	232	2254	1742	1411	173	131	135
30.75	274	296	232	2250	1720	1406	181	137	130
31	276	296	227	2281	1733	1414	191	201	125
31.25	270	302	234	2251	1732	1387	186	218	121
31.5	270	298	229	2222	1714	1400	188	212	122
31.75	269	301	235	2245	1741	1394	196	215	144
32	275	294	235	2245	1738	1351	175	214	137
32.25	270	303	233	2259	1727	1372	173	167	132
32.5	271	306	232	2149	1727	1362	176	182	140
32.75	273	297	231	2343	1708	1373	185	238	147
33	264	294	232	2478	1687	1366	183	261	158
33.25	274	293	229	2385	1709	1365	218	269	163
33.5	273	296	229	2308	1699	1318	231	252	180
33.75	257	290	227	2335	1672	1352	203	278	167
34	258	298	231	2331	1699	1407	151	269	159
34.25	258	297	230	2329	1716	1411	167	245	194
34.5	258	298	231	2271	1734	1416	273	207	183
34.75	258	297	232	2432	1727	1412	225	213	371
35	257	292	223	2255	1735	1411	202	222	359
35.25	252	291	240	2341	1716	1373	212	252	263
35.5	259	291	228	2197	1719	1389	277	195	289
35.75	256	288	233	2157	1703	1398	232	198	398
36	250	290	229	2176	1690	1379	197	230	277
36.25	257	281	230	2165	1712	1394	204	199	222
36.5	256	288	229	2199	1668	1404	198	179	223
36.75	253	287	223	2170	1672	1389	199	166	219
37	262	287	229	2157	1651	1399	236	203	266
37.25	256	293	225	2174	1651	1387	217	219	222
37.5	254	292	221	2173	1660	1348	225	211	166
37.75	257	294	216	2149	1656	1343	302	171	168
38	258	297	214	2201	1679	1352	222	207	352
38.25	253	295	217	2220	1692	1359	202	237	162
38.5	266	285	219	2214	1689	1361	263	233	191
38.75	265	287	217	2194	1667	1339	177	170	257
39	266	293	210	2251	1643	1370	235	159	347
39.25	263	291	210	2212	1642	1374	344	170	325
39.5	257	284	215	2206	1641	1347	375	160	279
39.75	265	283	213	2240	1616	1357	157	176	316
40	259	275	211	2211	1629	1350	153	218	378
40.25	263	281	214	2127	1601	1359	163	220	163
40.5	263	274	209	2122	1607	1356	216	214	198
40.75	267	280	207	2160	1568	1355	182	208	276
41	259	273	206	2092	1572	1333	162	214	181
41.25	260	276	204	2111	1593	1350	168	176	271
41.5	252	275	207	2122	1592	1265	176	172	241
41.75	261	272	204	2119	1596	1320	183	164	162
42	259	272	207	2111	1591	1355	163	184	337
42.25	257	275	209	2127	1592	1376	157	189	241
42.5	252	273	207	2130	1583	1385	158	195	165
42.75	246	276	204	2133	1587	1378	169	193	174
43	248	277	212	2160	1553	1354	174	188	226
43.25	251	274	205	2217	1598	1391	169	210	259
43.5	241	276	205	2187	1593	1374	166	185	176
43.75	238	274	206	2218	1586	1384	176	179	228
44	243	273	201	2201	1580	1387	218	192	218
44.25	243	276	198	2273	1589	1341	179	209	324
44.5	237	272	200	2151	1578	1351	181	223	264
44.75	232	269	204	2134	1566	1373	168	228	341
45	232	265	201	2148	1578	1351	176	223	237
45.25	236	270	194	2126	1575	1342	176	200	246
45.5	226	271	199	2110	1569	1361	168	207	295
45.75	240	269	193	2129	1548	1351	175	204	235
46	243	270	198	2102	1584	1377	169	201	292
46.25	235	264	200	2108	1597	1358	170	201	406
46.5	232	263	193	2090	1599	1376	175	198	273
46.75	231	268	200	2078	1587	1365	184	200	192
47	223	266	198	2063	1572	1378	199	192	197
47.25	224	270	196	2065	1592	1365	204	204	303
47.5	230	274	194	2070	1583	1360	235	224	302
47.75	229	266	196	2059	1569	1335	274	241	200
48	233	262	198	2087	1575	1337	304	230	197
48.25	222	263	195	2047	1559	1335	218	225	201
48.5	224	262	192	2060	1566	1346	206	225	250
48.75	225	261	193	2044	1587	1351	208	224	294
49	227	257	200	2039	1587	1367	224	223	312
49.25	222	264	194	2063	1575	1336	235	211	323
49.5	226	264	191	2095	1572	1329	256	202	300
49.75	222	262	196	2069	1571	1355	252	208	272
50	222	256	191	2034	1580	1370	227	211	236
50.25	220	262	190	2013	1608	1351	219	209	194
50.5	221	264	193	2026	1582	1351	215	223	188
50.75	229	264	192	2033	1587	1357	217	223	174
51	225	263	197	2065	1620	1336	216	238	170
51.25	227	258	193	2086	1581	1363	219	241	185
51.5	218	261	186	2059	1566	1350	212	233	184
51.75	216	262	188	2084	1562	1343	224	239	194
52	212	263	191	2100	1562	1345	236	225	200
52.25	218	267	187	2105	1582	1344	233	226	211
52.5	216	256	189	2084	1575	1364	221	226	205
52.75	214	261	187	2122	1565	1358	222	223	188
53	211	263	188	2113	1592	1358	227	230	187
53.25	211	254	184	2127	1590	1361	224	225	183
53.5	214	256	186	2162	1584	1338	226	225	193
53.75	214	258	186	2110	1596	1349	233	223	230
54	213	261	189	2099	1581	1364	233	239	262
54.25	210	263	185	2096	1570	1351	235	256	259
54.5	205	256	185	2086	1603	1363	235	263	241
54.75	213	259	182	2122	1610	1371	240	258	255
55	208	258	185	2096	1592	1365	242	244	245
55.25	217	255	183	2108	1625	1346	248	251	189
55.5	216	256	178	2040	1608	1353	242	255	207
55.75	203	253	181	2073	1604	1342	249	255	208
56	211	254	180	2125	1595	1351	250	258	213
56.25	212	247	177	2081	1601	1340	259	270	210
56.5	207	255	180	2099	1594	1346	272	266	229
56.75	208	248	178	2119	1570	1368	268	273	189
57	204	250	181	2120	1591	1360	286	274	206
57.25	217	250	175	2081	1588	1345	320	272	221
57.5	206	248	175	2116	1598	1406	346	279	239
57.75	206	253	177	2102	1583	1420	352	282	276
58	204	250	175	2095	1583	1484	332	281	280
58.25	207	247	178	2105	1597	1385	322	298	295
58.5	209	249	177	2115	1563	1407	310	290	296
58.75	208	243	178	2103	1575	1352	293	287	285
59	205	246	179	2115	1572	1353	289	291	277
59.25	205	250	174	2248	1582	1367	286	291	263
59.5	204	245	175	2146	1641	1398	280	295	244
59.75	202	241	175	2168	1475	1330	277	292	205
60	206	243	174	2120	1431	1239	277	294	203
60.25	209	239	178	2096	1462	1160	276	296	211
60.5	206	241	171	2065	1471	1198	272	298	220
60.75	205	240	168	2099	1473	1195	280	290	231
61	204	241	169	2118	1457	1179	286	289	251
61.25	207	238	171	2140	1411	1166	275	303	254
61.5	209	238	167	2050	1411	1190	283	301	256
61.75	198	230	167	2045	1419	1182	289	303	274
62	207	227	166	2018	1439	1184	299	302	319
62.25	207	230	171	1998	1455	1224	293	294	353
62.5	200	228	166	1942	1427	1239	292	307	332
62.75	203	228	160	1942	1455	1193	296	297	287
63	204	233	167	1940	1440	1199	298	283	288
63.25	205	227	163	1920	1441	1202	300	293	273
63.5	205	227	168	2037	1420	1207	289	291	251
63.75	201	219	161	1977	1459	1225	290	296	240
64	207	225	167	1987	1474	1210	288	319	243
64.25	201	221	162	1961	1518	1230	284	332	237
64.5	198	221	157	1957	1425	1225	284	339	250
64.75	193	225	157	1909	1482	1229	279	337	272
65	198	225	163	1877	1411	1224	273	347	291
65.25	200	220	160	1982	1446	1225	271	358	300
65.5	201	225	163	1938	1434	1221	273	360	312
65.75	193	224	161	1842	1423	1231	271	355	335
66	189	221	160	1882	1443	1220	279	339	333
66.25	189	220	157	1839	1389	1219	275	337	331
66.5	194	218	159	1876	1422	1205	264	340	328
66.75	189	226	158	1872	1443	1201	267	338	333
67	186	214	153	1944	1426	1235	264	346	325
67.25	188	220	157	1988	1458	1213	272	349	326
67.5	189	214	154	2019	1442	1228	276	356	322
67.75	190	211	151	2001	1476	1235	269	357	307
68	188	217	154	2061	1507	1263	271	355	283
68.25	185	213	161	1953	1424	1235	271	354	288
68.5	190	217	155	1933	1470	1239	279	344	267
68.75	194	217	156	1988	1479	1261	274	341	263
69	189	213	156	2017	1447	1283	277	342	259
69.25	184	215	162	2019	1437	1193	284	353	258
69.5	187	206	163	2021	1465	1227	297	366	265
69.75	187	216	154	2007	1476	1230	312	366	259
70	189	208	158	1992	1478	1237	316	381	261
70.25	189	209	156	1890	1521	1240	298	382	258
70.5	187	215	159	2041	1489	1242	295	380	261
70.75	184	208	160	2071	1490	1263	279	384	288
71	180	206	156	1988	1458	1280	286	380	324
71.25	179	209	154	2054	1358	1233	287	386	361
71.5	178	211	156	2117	1313	1262	290	383	386
71.75	184	210	158	2136	1311	1247	295	389	400
72	186	204	150	2082	1323	1224	295	367	400

## Sheet: Fig4b
Time Elapsed (hours)	WT tauRD 25uM			S320F tauRD 25uM			S320F/I328S tauRD 25uM
0	4	3	4	14	11	12	6	8	5
0.166667	4	1	2	15	10	14	7	7	5
0.333333	0	1	2	12	11	14	3	5	5
0.5	2	2	3	18	15	15	5	7	4
0.666667	4	0	2	23	16	15	5	7	1
0.833333	5	1	3	22	20	20	5	9	7
1	3	1	1	21	21	20	4	4	2
1.16667	2	2	0	24	24	22	3	7	7
1.33333	5	-2	1	27	21	24	3	5	4
1.5	3	2	-1	30	26	23	6	7	4
1.66667	5	1	1	29	25	24	4	6	3
1.83333	3	-1	4	33	27	31	6	6	6
2	5	4	2	32	30	31	5	9	9
2.16667	2	0	2	31	32	32	4	9	4
2.33333	4	-3	0	35	26	30	5	4	2
2.5	2	1	0	36	29	32	4	7	1
2.66667	3	0	1	33	30	37	3	6	2
2.83333	2	3	-1	34	34	32	2	7	3
3	0	2	3	32	32	38	3	7	5
3.16667	3	2	1	37	30	42	6	6	3
3.33333	0	-1	-1	37	33	38	4	6	7
3.5	2	1	-1	36	35	37	2	8	4
3.66667	3	1	0	39	32	40	6	6	5
3.83333	2	-1	1	40	37	42	4	6	5
4	2	-1	3	38	37	42	4	5	4
4.16667	3	0	1	35	33	41	3	5	4
4.33333	1	2	2	41	39	40	4	7	6
4.5	2	0	4	40	38	42	4	5	6
4.66667	1	1	-1	38	37	43	4	7	4
4.83333	1	4	2	40	42	40	3	6	5
5	1	0	3	40	42	45	2	8	7
5.16667	5	3	4	41	42	44	4	7	6
5.33333	0	1	4	41	43	47	3	7	8
5.5	2	0	3	46	46	42	4	5	4
5.66667	3	0	4	40	43	43	5	6	5
5.83333	1	0	1	43	42	46	5	5	5
6	3	2	1	41	44	45	4	9	2
6.16667	0	0	2	42	44	49	4	6	4
6.33333	2	2	1	40	41	46	6	8	4
6.5	2	4	0	40	47	44	4	9	4
6.66667	1	3	0	47	47	45	3	6	6
6.83333	4	2	1	44	45	43	5	10	5
7	2	2	0	43	44	43	4	8	2
7.16667	1	3	2	42	44	46	6	9	5
7.33333	3	3	2	47	45	45	6	7	4
7.5	2	2	1	43	46	46	5	10	4
7.66667	0	1	2	44	43	46	5	8	6
7.83333	3	4	-2	41	43	43	4	8	5
8	2	2	1	44	45	42	5	7	6
8.16667	3	2	4	41	44	48	4	8	7
8.33333	2	3	2	42	45	46	4	9	5
8.5	4	2	0	47	44	44	7	6	4
8.66667	3	2	2	40	40	47	1	7	3
8.83333	0	1	2	40	45	46	2	8	6
9	5	3	1	44	42	45	4	9	5
9.16667	1	2	1	43	38	48	2	8	5
9.33333	2	0	1	41	44	44	3	10	6
9.5	3	3	5	41	43	45	4	8	7
9.66667	2	3	2	46	44	46	6	8	6
9.83333	-2	2	0	39	45	46	2	10	1
10	0	1	1	42	43	43	4	8	6
10.1667	1	4	3	42	45	46	6	8	6
10.3333	1	2	0	44	44	48	6	8	6
10.5	1	3	1	38	46	48	3	9	6
10.6667	4	2	2	47	47	46	6	8	5
10.8333	3	2	1	40	42	45	3	9	3
11	1	1	5	42	43	48	3	10	8
11.1667	2	0	0	43	43	45	3	8	4
11.3333	2	2	1	40	44	47	4	7	3
11.5	3	3	1	42	42	46	4	8	5
11.6667	5	2	0	43	41	43	7	9	4
11.8333	1	2	0	38	44	45	4	6	5
12	5	1	-1	42	38	41	7	9	2
12.1667	2	6	1	41	47	46	5	10	4
12.3333	3	3	3	44	41	45	4	4	6
12.5	-1	1	3	37	40	45	2	7	5
12.6667	2	3	1	40	43	44	6	9	4
12.8333	1	4	0	39	41	46	4	11	4
13	1	3	2	42	41	44	5	7	4
13.1667	2	-1	1	42	40	45	3	7	5
13.3333	1	2	1	41	41	43	4	10	5
13.5	2	1	0	38	39	46	4	8	5
13.6667	3	2	2	42	38	49	6	7	5
13.8333	2	0	1	39	42	45	3	10	6
14	3	4	-2	39	43	43	3	9	2
14.1667	3	5	4	37	42	44	4	8	7
14.3333	0	3	2	39	39	46	1	9	5
14.5	1	0	0	39	38	43	3	6	6
14.6667	3	4	1	39	41	43	6	9	6
14.8333	1	2	2	42	40	46	6	10	7
15	0	2	4	39	38	47	4	7	6
15.1667	-1	5	2	37	40	46	3	8	5
15.3333	2	0	2	39	44	43	6	7	6
15.5	2	1	1	37	42	44	4	7	6
15.6667	2	1	2	39	38	43	5	6	6
15.8333	5	2	3	37	42	45	5	7	6
16	2	1	0	40	39	40	5	8	5
16.1667	3	1	2	39	39	44	5	9	5
16.3333	3	1	-2	37	39	42	5	9	5
16.5	1	1	0	41	33	43	1	8	6
16.6667	2	4	3	40	40	44	2	8	5
16.8333	2	2	1	42	39	42	2	8	5
17	2	1	2	43	37	40	4	7	4
17.1667	3	2	0	42	42	45	4	9	7
17.3333	2	1	3	42	37	44	4	8	7
17.5	5	2	3	43	36	45	4	6	5
17.6667	1	4	0	41	40	42	3	10	5
17.8333	4	2	3	43	36	40	6	7	5
18	3	2	0	43	36	42	4	6	7
18.1667	1	2	4	45	39	44	3	11	8
18.3333	2	0	2	42	38	40	5	7	7
18.5	3	2	1	45	41	43	3	8	7
18.6667	6	0	1	44	38	43	6	8	5
18.8333	3	3	5	43	40	43	5	8	7
19	3	4	2	44	39	40	6	9	5
19.1667	4	2	3	43	37	41	3	9	5
19.3333	3	1	2	40	36	43	5	9	8
19.5	5	0	-1	46	36	41	6	7	5
19.6667	4	2	2	43	40	40	5	7	5
19.8333	3	2	3	42	37	41	4	9	5
20	3	1	0	43	40	38	5	7	2
20.1667	2	2	3	43	39	42	4	8	6
20.3333	2	1	3	40	35	42	6	8	7
20.5	3	2	0	44	35	39	2	10	5
20.6667	3	2	2	39	35	40	2	8	6
20.8333	2	1	0	44	35	41	5	8	6
21	3	1	2	41	33	39	2	8	5
21.1667	3	3	1	41	37	37	6	11	3
21.3333	3	2	3	41	38	40	1	10	4
21.5	1	4	1	42	36	40	4	11	6
21.6667	4	2	4	43	39	41	6	10	6
21.8333	3	0	4	38	36	39	5	6	5
22	5	2	1	40	36	39	4	7	5
22.1667	3	0	2	40	36	41	3	7	5
22.3333	2	4	3	39	33	40	4	9	6
22.5	1	2	5	41	34	38	5	7	7
22.6667	2	1	2	37	36	44	4	7	7
22.8333	4	2	3	41	40	38	6	9	5
23	1	0	4	38	33	42	4	6	7
23.1667	4	0	3	41	36	41	5	7	6
23.3333	1	3	4	42	36	37	2	10	5
23.5	2	4	-1	39	35	38	1	10	4
23.6667	4	3	0	38	37	38	4	9	4
23.8333	1	2	2	36	33	37	4	7	7
24	4	3	2	42	35	41	5	9	6
24.1667	0	3	1	42	37	38	5	10	3
24.3333	3	3	1	43	35	38	6	8	5
24.5	2	-1	1	42	37	36	6	6	5
24.6667	2	2	1	42	35	38	5	8	6
24.8333	3	5	1	41	34	36	5	8	5
25	3	1	2	39	35	37	5	7	6
25.1667	3	2	3	39	34	41	4	7	7
25.3333	1	1	3	36	35	40	2	10	7
25.5	6	2	0	36	34	36	5	10	3
25.6667	2	4	0	37	35	37	5	12	4
25.8333	-2	1	0	37	35	38	0	7	5
26	6	4	1	40	34	37	8	8	7
26.1667	4	2	1	41	35	39	6	8	6
26.3333	4	2	2	39	32	38	6	9	5
26.5	0	2	0	41	32	37	4	8	2
26.6667	1	2	2	38	35	39	2	7	4
26.8333	5	1	0	39	35	36	7	8	7
27	2	3	2	40	34	39	5	9	5
27.1667	1	-1	0	40	31	36	5	7	5
27.3333	2	1	0	40	35	34	5	9	3
27.5	3	2	4	40	34	37	5	8	6
27.6667	3	2	3	37	34	41	4	9	6
27.8333	5	0	1	38	33	36	7	9	6
28	5	5	3	41	31	40	4	8	7
28.1667	1	2	2	36	34	36	2	7	6
28.3333	1	0	3	39	34	39	3	7	6
28.5	1	-1	2	36	33	38	6	6	5
28.6667	2	2	4	39	32	40	4	6	5
28.8333	5	-1	4	40	31	38	6	6	5
29	2	2	1	38	31	37	3	7	6
29.1667	2	3	4	36	34	36	1	8	3
29.3333	4	3	4	41	34	38	6	9	4
29.5	3	3	0	35	33	35	4	9	4
29.6667	4	1	2	40	35	38	6	8	5
29.8333	4	5	1	39	34	38	6	10	4
30	3	1	4	38	32	39	5	10	4
30.1667	3	1	0	37	31	34	5	5	5
30.3333	3	2	3	38	35	37	5	9	7
30.5	2	2	3	37	30	36	6	8	7
30.6667	4	3	4	41	30	37	9	10	8
30.8333	3	4	1	37	37	42	5	9	5
31	4	3	-1	34	39	39	5	10	3
31.1667	2	1	0	40	32	38	5	9	6
31.3333	2	-1	3	36	34	34	3	9	4
31.5	0	1	1	34	33	33	2	8	5
31.6667	4	1	2	38	36	37	7	6	7
31.8333	4	0	1	40	31	35	5	8	5
32	4	4	3	40	32	35	5	9	5
32.1667	4	2	2	37	34	36	3	7	5
32.3333	3	-2	3	36	32	42	5	6	5
32.5	4	1	0	37	31	35	6	8	5
32.6667	3	1	4	40	32	39	8	8	6
32.8333	4	1	4	36	34	39	5	7	8
33	3	0	2	36	32	39	4	9	6
33.1667	2	1	3	37	31	36	5	8	5
33.3333	0	1	4	35	30	37	4	8	6
33.5	2	1	2	36	32	37	1	6	5
33.6667	4	0	1	36	31	38	4	7	6
33.8333	2	1	2	35	33	36	4	7	7
34	3	4	2	36	30	35	3	8	4
34.1667	3	2	2	37	34	39	6	7	5
34.3333	-1	2	2	35	34	33	3	7	6
34.5	2	-1	1	34	30	35	2	7	4
34.6667	0	0	0	38	31	38	6	10	5
34.8333	2	1	2	36	33	39	4	8	5
35	3	1	0	36	32	35	6	6	2
35.1667	4	1	2	34	36	38	5	11	5
35.3333	3	0	4	38	30	38	3	8	4
35.5	3	2	1	38	35	35	5	9	4
35.6667	5	1	2	35	30	40	6	7	7
35.8333	-1	0	2	34	30	37	3	10	5
36	2	2	1	36	33	34	4	10	5
36.1667	2	1	0	38	32	36	2	6	3
36.3333	3	4	2	38	33	35	6	10	6
36.5	2	1	2	37	28	36	7	7	3
36.6667	4	0	2	37	31	38	6	9	8
36.8333	0	0	2	32	32	36	2	9	6
37	2	1	2	37	33	38	4	8	7
37.1667	2	2	1	33	34	33	5	7	5
37.3333	4	1	0	35	32	35	6	8	7
37.5	2	2	3	36	31	40	6	8	6
37.6667	2	3	1	36	34	39	6	10	3
37.8333	4	4	-1	33	35	35	4	10	3
38	2	-1	3	35	30	38	2	6	6
38.1667	5	3	4	36	34	40	5	10	5
38.3333	3	4	1	34	36	34	3	10	6
38.5	1	3	4	35	32	33	3	10	3
38.6667	2	1	4	36	29	38	6	9	7
38.8333	3	2	3	35	33	34	5	9	6
39	1	3	3	38	35	37	4	11	6
39.1667	6	4	1	36	34	35	7	9	4
39.3333	1	1	4	35	29	37	6	6	5
39.5	2	1	4	35	34	35	4	11	5
39.6667	3	0	3	38	30	34	6	9	6
39.8333	0	4	3	33	35	39	4	11	5
40	0	2	2	34	32	35	3	9	6
40.1667	1	1	2	33	32	35	4	7	5
40.3333	2	3	3	35	35	37	4	12	3
40.5	3	2	2	36	32	37	5	9	5
40.6667	2	4	1	35	32	38	5	10	6
40.8333	2	2	3	36	33	36	7	7	4
41	2	2	2	36	31	36	4	10	6
41.1667	2	2	0	32	33	35	3	9	6
41.3333	7	0	2	37	30	36	8	7	5
41.5	3	2	2	34	31	35	6	10	7
41.6667	2	1	0	35	32	32	3	10	4
41.8333	3	0	0	33	29	36	5	5	7
42	3	2	1	35	30	33	4	7	5
42.1667	2	3	1	34	35	34	4	9	6
42.3333	3	0	2	36	32	37	9	9	8
42.5	3	0	0	34	32	35	4	9	3
42.6667	5	4	1	38	32	34	6	9	5
42.8333	2	2	4	35	29	36	4	7	6
43	2	1	3	34	30	38	4	7	4
43.1667	2	1	0	33	32	33	3	8	3
43.3333	4	2	0	37	31	35	6	11	6
43.5	0	4	3	37	33	37	6	10	7
43.6667	3	-1	1	37	29	34	5	7	7
43.8333	5	1	2	32	32	35	7	9	6
44	2	1	2	36	30	38	4	9	8
44.1667	2	2	2	35	33	34	3	7	3
44.3333	4	0	0	40	28	34	7	5	4
44.5	2	1	-1	36	31	32	4	8	3
44.6667	2	0	2	35	32	34	4	7	7
44.8333	3	2	0	33	31	35	5	9	4
45	4	2	3	35	34	38	6	9	6
45.1667	2	3	0	37	38	35	5	9	3
45.3333	0	0	0	38	32	36	4	7	5
45.5	4	1	2	37	32	38	6	9	5
45.6667	6	1	2	39	30	34	8	8	5
45.8333	2	2	4	35	30	34	4	9	2
46	3	3	2	38	30	34	6	10	6
46.1667	0	3	3	31	33	36	3	10	8
46.3333	1	3	5	34	32	34	3	7	6
46.5	2	3	2	35	32	37	3	7	4
46.6667	2	-1	2	38	30	36	5	8	4
46.8333	3	0	0	35	33	34	7	8	3
47	4	2	1	34	35	35	6	8	5
47.1667	1	3	4	37	31	38	3	7	6
47.3333	4	2	3	37	33	36	5	8	5
47.5	3	1	1	36	31	33	5	8	4
47.6667	1	2	2	34	32	37	4	9	8
47.8333	4	0	3	35	31	32	6	7	6
48	2	1	4	35	28	36	4	4	7
48.1667	4	2	1	39	28	37	7	8	6
48.3333	0	4	2	32	32	34	4	9	6
48.5	2	3	4	35	26	37	4	7	8
48.6667	3	4	1	36	30	34	5	8	3
48.8333	2	1	3	33	28	39	6	7	8
49	3	3	2	33	32	36	3	8	6
49.1667	3	1	1	36	31	35	5	7	6
49.3333	4	1	6	36	32	37	5	6	7
49.5	2	2	1	36	30	37	5	9	6
49.6667	1	-1	2	34	30	35	6	7	4
49.8333	3	3	2	37	34	36	6	6	5
50	5	3	3	39	33	36	5	7	5
50.1667	5	0	2	34	28	37	5	6	6
50.3333	1	0	3	34	29	38	4	7	7
50.5	3	2	-1	33	33	33	3	8	5
50.6667	5	3	2	34	34	35	8	11	7
50.8333	4	1	2	35	30	34	7	8	5
51	4	1	4	34	30	36	5	7	6
51.1667	1	2	-1	35	32	35	5	8	4
51.3333	3	4	2	34	34	36	5	9	6
51.5	0	2	2	34	33	33	4	11	6
51.6667	1	4	4	36	32	35	3	10	8
51.8333	3	1	0	36	28	30	5	8	4
52	0	2	3	31	32	34	3	10	7
52.1667	4	0	5	34	31	36	5	9	9
52.3333	1	0	1	32	29	33	5	8	2
52.5	3	1	1	34	32	34	4	10	7
52.6667	1	2	1	36	32	35	5	9	5
52.8333	3	0	2	33	28	35	5	8	5
53	2	2	5	33	28	37	4	9	6
53.1667	2	4	-1	33	31	33	4	9	5
53.3333	4	2	2	35	28	36	4	7	5
53.5	4	0	1	38	28	34	6	7	3
53.6667	1	2	-1	33	30	35	5	9	2
53.8333	3	1	3	34	29	33	5	8	6
54	4	4	0	32	32	35	5	11	3
54.1667	0	2	-3	35	29	32	5	8	3
54.3333	0	3	0	33	31	34	3	10	5
54.5	5	2	1	36	28	36	4	9	7
54.6667	1	3	2	34	33	32	6	9	6
54.8333	2	3	3	38	32	35	4	12	7
55	3	-1	1	33	28	35	3	7	6
55.1667	3	3	3	34	33	37	5	10	6
55.3333	6	4	3	33	34	36	7	12	5
55.5	4	1	2	35	31	35	4	9	7
55.6667	5	1	3	40	32	34	8	8	6
55.8333	1	1	5	33	29	35	2	11	7
56	3	1	3	34	34	34	3	10	6
56.1667	0	1	5	33	29	38	3	10	8
56.3333	1	2	4	36	33	35	5	9	6
56.5	2	2	3	33	33	34	4	9	8
56.6667	5	1	2	36	30	36	6	8	8
56.8333	3	3	3	36	31	34	5	7	8
57	3	1	2	35	31	38	4	8	5
57.1667	2	0	3	37	31	34	4	6	5
57.3333	1	2	3	31	32	35	3	11	6
57.5	2	2	1	34	29	35	5	9	5
57.6667	2	3	1	32	32	36	5	8	4
57.8333	2	3	1	36	34	34	5	9	5
58	3	3	3	37	32	36	4	8	6
58.1667	3	2	-1	35	28	37	6	8	5
58.3333	3	0	2	34	30	35	5	6	7
58.5	4	2	4	36	29	35	7	10	7
58.6667	2	1	0	34	31	32	4	7	5
58.8333	3	1	2	37	30	32	5	11	6
59	4	2	2	34	32	36	4	9	4
59.1667	3	2	2	37	27	32	3	8	5
59.3333	3	4	3	33	33	37	4	10	7
59.5	2	2	3	34	29	34	3	7	5
59.6667	4	0	1	35	32	32	7	8	3
59.8333	0	0	3	35	30	38	4	7	5
60	5	0	0	37	29	34	6	7	3
60.1667	0	2	3	35	29	32	4	11	7
60.3333	4	1	3	37	32	36	4	6	7
60.5	5	3	0	36	31	34	4	8	6
60.6667	4	1	3	38	33	38	4	10	9
60.8333	1	3	3	35	33	35	4	11	7
61	3	1	1	31	32	33	6	9	4
61.1667	1	3	2	32	31	38	3	9	7
61.3333	0	3	2	34	32	33	4	8	5
61.5	0	-2	1	37	30	37	3	8	4
61.6667	3	3	0	37	35	32	4	9	5
61.8333	4	3	1	34	33	34	7	7	5
62	2	1	3	35	33	35	4	8	5
62.1667	3	3	4	37	34	37	5	12	9
62.3333	3	3	1	35	34	35	5	9	5
62.5	2	0	2	34	30	36	5	7	8
62.6667	4	1	1	34	30	33	5	7	5
62.8333	3	2	3	36	31	34	2	7	4
63	3	2	4	34	30	37	5	10	6
63.1667	-1	2	5	31	36	34	2	11	7
63.3333	1	2	2	32	31	36	3	10	4
63.5	5	-1	4	38	31	35	7	7	7
63.6667	2	1	2	35	32	39	5	9	6
63.8333	0	0	4	32	30	38	4	10	5
64	4	2	4	36	30	37	7	9	8
64.1667	3	4	2	33	34	36	8	11	7
64.3333	3	2	3	35	30	34	5	8	4
64.5	4	0	1	39	30	36	7	6	4
64.6667	1	2	3	35	33	32	4	8	5
64.8333	3	2	1	34	33	33	6	10	6
65	-1	2	2	32	31	36	2	8	5
65.1667	2	3	2	35	33	34	4	9	5
65.3333	3	4	1	35	33	36	6	9	5
65.5	1	3	0	34	31	36	3	8	4
65.6667	4	3	2	34	29	34	4	8	5
65.8333	4	4	0	34	31	32	9	11	4
66	0	4	3	32	36	37	3	11	6
66.1667	4	1	3	35	33	36	8	10	5
66.3333	3	0	4	34	32	34	4	9	5
66.5	4	3	3	36	35	36	7	11	5
66.6667	2	1	1	35	28	35	6	5	5
66.8333	2	4	3	34	32	38	7	10	6
67	4	1	1	31	31	35	6	5	3
67.1667	3	1	2	38	33	35	4	7	4
67.3333	3	1	2	34	31	36	4	9	5
67.5	2	2	1	37	33	35	7	8	5
67.6667	1	1	-1	33	30	31	5	9	4
67.8333	2	1	-1	35	29	33	5	9	3
68	1	0	3	36	28	35	5	9	3
68.1667	4	0	-1	35	28	33	7	7	4
68.3333	3	1	4	35	32	38	4	9	6
68.5	2	4	2	35	30	35	5	10	5
68.6667	0	5	2	35	34	35	5	9	5
68.8333	3	2	-1	36	32	32	5	9	3
69	4	-1	3	40	29	34	7	8	5
69.1667	1	0	2	34	31	34	5	9	5
69.3333	1	3	3	33	32	36	4	9	5
69.5	4	2	2	36	33	37	7	8	5
69.6667	3	2	3	36	28	36	6	7	6
69.8333	0	1	3	34	32	36	3	5	4
70	1	2	3	33	32	36	4	10	6
70.1667	2	0	4	33	32	34	4	7	9
70.3333	4	1	0	35	31	35	6	8	4
70.5	3	1	3	37	26	38	5	5	9
70.6667	2	4	2	32	33	33	6	12	4
70.8333	2	2	2	37	31	35	4	9	5
71	1	2	2	39	31	33	6	9	7
71.1667	2	4	2	33	31	37	1	9	4
71.3333	6	0	-1	34	30	32	6	8	4
71.5	3	1	-1	37	29	34	4	8	3
71.6667	3	2	1	32	32	36	4	9	3
71.8333	1	1	2	36	30	35	2	11	6
72	2	3	1	33	33	35	5	9	3

## Sheet: Supplementary_fig4a
Time Elapsed (hours)	S320F/L315S 295-330			S320F/L325S 295-330			S320F/I328S 295-330			S320F 295-330			WT 295-330
0	-24	1	-4	29	52	48	27	47	36	119	110	16	19	20	18
0.25	-17	2	-2	53	75	67	26	46	39	435	446	274	21	17	19
0.5	-17	2	-1	71	91	86	33	50	43	737	966	670	22	19	18
0.75	-16	5	0	93	107	113	33	53	43	1168	1205	899	24	22	23
1	-19	4	3	100	126	121	34	58	47	1480	1557	964	26	23	21
1.25	-13	5	1	119	136	134	35	61	47	1680	1688	1201	28	26	22
1.5	-12	5	0	124	135	138	41	55	46	1831	1802	1414	27	26	26
1.75	-12	8	2	129	146	138	39	57	45	2017	1889	1469	26	25	25
2	-10	7	1	129	142	130	40	53	46	2137	1881	1545	29	29	25
2.25	-13	8	3	125	142	136	35	51	39	2191	2141	1554	28	27	25
2.5	-11	6	4	120	135	134	34	52	39	2218	2149	1517	33	29	28
2.75	-10	10	4	115	131	139	33	49	38	2417	2183	1620	30	32	27
3	-10	8	2	101	125	128	29	48	36	2319	2031	1607	32	30	29
3.25	-11	7	6	99	115	121	33	45	42	2351	2089	1555	40	33	30
3.5	-9	8	6	94	110	115	28	41	39	2513	2233	1595	41	37	34
3.75	-6	11	5	87	105	114	30	44	37	2491	2399	1653	45	45	35
4	-9	12	4	83	100	107	27	41	37	2475	2547	1598	49	48	38
4.25	-10	13	6	75	98	105	25	46	34	2456	2727	1579	57	46	43
4.5	-5	9	4	74	94	97	25	41	33	2423	2610	1562	59	60	43
4.75	-10	12	4	73	92	100	23	41	31	2431	2400	1566	62	57	46
5	-7	10	4	74	90	99	23	43	34	2387	2384	1565	65	64	51
5.25	-3	11	2	76	91	95	27	43	33	2405	2379	1580	66	61	56
5.5	-2	11	7	78	92	101	30	39	38	2459	2383	1571	66	64	60
5.75	-4	13	6	72	93	98	25	42	35	2443	2407	1538	71	63	64
6	-3	13	8	79	91	105	24	45	32	2461	2393	1522	67	66	62
6.25	-3	11	7	83	92	110	29	44	34	2435	2406	1543	69	65	65
6.5	-3	16	8	83	93	126	26	48	39	2448	2391	1548	70	68	65
6.75	-5	11	7	86	102	139	27	43	37	2457	2414	1512	71	66	67
7	-1	14	7	96	103	153	32	46	35	2439	2403	1543	68	66	63
7.25	-1	16	10	100	104	172	32	44	39	2434	2386	1543	68	67	67
7.5	2	12	9	103	109	185	35	47	39	2440	2399	1536	73	69	67
7.75	-5	14	10	110	115	225	30	48	37	2441	2420	1532	70	71	66
8	2	12	9	122	122	246	38	50	39	2435	2431	1507	71	66	69
8.25	3	13	9	132	132	267	34	50	41	2445	2441	1519	76	69	69
8.5	-2	13	11	139	142	298	37	55	47	2436	2420	1535	70	69	72
8.75	0	14	13	161	154	325	38	54	48	2434	2468	1524	69	72	69
9	0	13	11	166	172	364	41	58	46	2439	2430	1526	74	72	72
9.25	0	15	12	171	194	446	46	70	46	2437	2436	1509	77	69	70
9.5	-1	16	9	182	213	519	37	67	52	2423	2422	1503	72	72	72
9.75	0	15	10	202	243	620	41	85	55	2430	2419	1525	75	76	68
10	-1	13	10	221	273	724	42	108	64	2423	2440	1516	71	72	70
10.25	0	12	11	245	305	811	48	124	69	2447	2440	1521	78	73	70
10.5	0	17	13	299	341	931	53	149	98	2454	2344	1535	77	73	68
10.75	3	14	12	337	377	1004	67	137	113	2464	2360	1533	72	76	70
11	1	16	10	388	427	1074	79	157	120	2467	2339	1500	77	79	68
11.25	1	15	10	454	463	1169	90	165	119	2481	2354	1493	78	79	73
11.5	3	16	10	526	512	1225	90	159	132	2444	2339	1530	76	77	75
11.75	4	15	12	580	547	1309	90	173	143	2472	2330	1521	75	78	76
12	1	18	10	679	595	1303	100	179	154	2442	2350	1527	75	83	75
12.25	3	17	12	784	650	1346	117	191	165	2421	2335	1514	77	81	73
12.5	0	16	13	883	717	1373	147	231	213	2357	2321	1496	77	82	76
12.75	2	16	14	969	757	1368	153	257	273	2482	2257	1533	76	84	77
13	0	16	12	1075	789	1412	175	277	288	2714	2286	1513	82	80	75
13.25	1	15	11	1126	832	1462	174	304	309	2633	2159	1501	79	84	76
13.5	4	18	11	1151	889	1507	171	358	308	2340	2156	1524	75	83	78
13.75	1	17	11	1213	944	1566	200	265	300	2373	2144	1530	81	85	77
14	0	18	10	1260	1005	1594	196	312	253	2378	2163	1526	75	83	78
14.25	3	17	10	1336	1050	1625	224	301	189	2438	2138	1534	78	85	75
14.5	2	16	13	1395	1088	1664	250	319	227	2352	2135	1540	81	81	80
14.75	4	15	15	1475	1111	1695	267	314	219	2355	2142	1523	85	82	81
15	4	17	9	1547	1148	1715	245	351	247	2353	2119	1509	83	81	78
15.25	6	15	12	1613	1171	1717	309	339	315	2371	2131	1529	84	85	81
15.5	7	18	11	1651	1196	1740	319	280	287	2292	2137	1502	84	89	79
15.75	3	18	10	1726	1218	1771	305	275	290	2325	2133	1514	81	85	80
16	5	19	12	1777	1256	1818	233	333	274	2321	2118	1498	86	87	81
16.25	6	16	10	1835	1279	1809	214	397	276	2317	2113	1525	84	87	78
16.5	8	20	12	1873	1298	1800	215	312	278	2356	2126	1533	85	92	79
16.75	8	18	13	1863	1318	1814	234	267	286	2317	2102	1520	85	90	78
17	6	16	13	1862	1322	1794	252	271	271	2317	2136	1515	89	91	81
17.25	9	14	13	1889	1371	1823	255	270	270	2321	2138	1502	90	96	82
17.5	6	15	13	1915	1405	1902	256	293	261	2395	2101	1517	90	99	85
17.75	7	17	11	1911	1455	1927	260	313	265	2338	2093	1504	95	107	84
18	6	17	12	1924	1465	1921	259	314	269	2343	2097	1496	97	102	86
18.25	6	17	13	1923	1481	1950	243	303	266	2351	2108	1504	98	108	83
18.5	7	18	13	1889	1501	1934	246	313	267	2345	2085	1495	101	112	84
18.75	7	18	10	1860	1528	1972	246	303	265	2333	2084	1500	96	115	91
19	7	15	12	1890	1537	2005	252	307	258	2336	2093	1471	97	114	91
19.25	6	17	15	1914	1561	1988	250	316	262	2323	2098	1496	95	115	87
19.5	5	16	12	1903	1579	1976	246	314	247	2316	2093	1478	96	113	90
19.75	7	17	10	1911	1588	1936	254	311	240	2304	2104	1493	97	108	95
20	6	17	14	1909	1623	1962	253	319	237	2290	2067	1483	98	107	96
20.25	9	17	13	1876	1618	1949	258	313	257	2312	2073	1463	97	108	97
20.5	9	18	12	1887	1618	1890	257	306	262	2295	2076	1473	97	104	93
20.75	8	20	12	1875	1639	1830	242	310	258	2309	2092	1475	97	107	91
21	5	20	13	1826	1659	1799	243	309	246	2309	2084	1474	103	109	92
21.25	9	21	10	1877	1658	1716	238	304	249	2326	2085	1475	106	113	95
21.5	11	26	10	1914	1714	1574	246	307	242	2318	2076	1465	106	110	95
21.75	9	22	14	1938	1744	1320	243	302	240	2319	2073	1480	105	108	92
22	12	23	10	1940	1807	1187	240	300	234	2298	2042	1490	100	114	90
22.25	10	24	13	1921	1878	1181	248	303	228	2312	2078	1478	104	110	95
22.5	8	23	12	1876	1911	1169	242	303	234	2318	2070	1454	100	108	89
22.75	10	20	17	1886	1923	1183	240	302	235	2289	2078	1470	105	107	93
23	7	22	16	1907	1988	1196	240	308	230	2326	2044	1464	102	112	91
23.25	11	22	16	1919	2026	1197	251	297	234	2286	2056	1471	101	115	95
23.5	13	22	19	1855	2053	1236	243	307	238	2294	2087	1432	104	113	94
23.75	8	28	22	1776	2041	1251	245	302	245	2294	2106	1451	104	108	93
24	12	23	24	1751	2100	1270	255	301	256	2300	2098	1460	101	109	92
24.25	9	22	23	1717	2147	1293	259	301	246	2300	2122	1453	100	110	93
24.5	13	26	26	1707	2152	1284	261	300	245	2288	2064	1453	109	134	97
24.75	16	30	27	1717	2161	1292	258	301	263	2292	2017	1439	127	140	101
25	19	26	28	1712	2210	1278	274	305	251	2303	2129	1433	157	158	100
25.25	20	30	29	1707	2238	1279	269	305	251	2306	2061	1436	175	191	107
25.5	25	26	29	1748	2262	1301	268	306	251	2310	2057	1430	176	156	103
25.75	30	30	34	1733	2257	1287	268	299	250	2292	2086	1425	189	133	104
26	33	36	38	1674	2265	1300	268	309	248	2311	1941	1432	187	129	109
26.25	32	33	39	1694	2286	1308	270	304	247	2282	1914	1436	183	132	108
26.5	34	35	33	1726	2281	1315	275	305	245	2295	1915	1427	176	131	104
26.75	36	33	30	1800	2289	1324	273	311	251	2301	1911	1426	180	122	117
27	37	33	33	1875	2302	1319	272	311	248	2282	1870	1435	147	112	129
27.25	36	30	36	1865	2261	1315	276	311	246	2281	1870	1423	195	114	140
27.5	36	34	37	1802	2201	1332	268	313	253	2273	1873	1391	159	124	146
27.75	41	33	42	1732	2130	1315	261	306	248	2275	1902	1401	157	117	157
28	36	37	42	1664	2127	1278	265	309	251	2278	1866	1398	164	120	151
28.25	40	42	39	1601	2152	1255	264	307	245	2263	1777	1419	158	123	153
28.5	42	43	41	1587	2135	1247	269	313	243	2272	1794	1409	162	126	143
28.75	45	49	41	1606	2170	1242	273	308	249	2251	1791	1413	145	134	121
29	49	51	37	1571	2191	1284	261	313	243	2261	1779	1398	169	159	106
29.25	48	47	39	1575	2208	1302	281	311	232	2256	1780	1388	202	173	123
29.5	43	46	38	1582	2187	1320	286	311	231	2265	1774	1397	200	167	143
29.75	47	51	39	1580	2141	1323	284	305	226	2223	1740	1394	157	195	158
30	46	50	34	1567	2080	1366	276	305	219	2254	1727	1400	164	152	151
30.25	46	56	34	1605	1988	1380	274	297	221	2269	1736	1382	171	130	143
30.5	53	57	37	1593	2006	1331	278	298	232	2254	1742	1411	173	131	135
30.75	55	55	29	1606	1950	1312	274	296	232	2250	1720	1406	181	137	130
31	57	58	29	1611	1939	1218	276	296	227	2281	1733	1414	191	201	125
31.25	56	56	34	1569	1938	1148	270	302	234	2251	1732	1387	186	218	121
31.5	63	52	32	1549	1922	1116	270	298	229	2222	1714	1400	188	212	122
31.75	60	53	35	1565	1928	1063	269	301	235	2245	1741	1394	196	215	144
32	72	48	36	1546	1943	1065	275	294	235	2245	1738	1351	175	214	137
32.25	74	51	36	1558	1951	1046	270	303	233	2259	1727	1372	173	167	132
32.5	77	56	43	1530	1969	1055	271	306	232	2149	1727	1362	176	182	140
32.75	66	55	40	1512	1984	1047	273	297	231	2343	1708	1373	185	238	147
33	61	48	42	1545	1989	1046	264	294	232	2478	1687	1366	183	261	158
33.25	52	50	42	1521	1961	1030	274	293	229	2385	1709	1365	218	269	163
33.5	57	46	39	1519	1972	1064	273	296	229	2308	1699	1318	231	252	180
33.75	53	54	44	1537	1983	1066	257	290	227	2335	1672	1352	203	278	167
34	60	50	40	1522	2011	1043	258	298	231	2331	1699	1407	151	269	159
34.25	59	49	38	1560	2013	1035	258	297	230	2329	1716	1411	167	245	194
34.5	59	52	39	1565	1997	1021	258	298	231	2271	1734	1416	273	207	183
34.75	59	60	40	1577	1967	1004	258	297	232	2432	1727	1412	225	213	371
35	60	76	33	1590	1975	998	257	292	223	2255	1735	1411	202	222	359
35.25	79	92	33	1536	1965	984	252	291	240	2341	1716	1373	212	252	263
35.5	95	93	37	1537	1954	991	259	291	228	2197	1719	1389	277	195	289
35.75	95	92	37	1522	1974	957	256	288	233	2157	1703	1398	232	198	398
36	98	87	43	1552	1973	951	250	290	229	2176	1690	1379	197	230	277
36.25	124	88	48	1535	2009	926	257	281	230	2165	1712	1394	204	199	222
36.5	139	102	51	1584	1973	969	256	288	229	2199	1668	1404	198	179	223
36.75	135	103	53	1560	1970	944	253	287	223	2170	1672	1389	199	166	219
37	129	116	57	1586	2002	944	262	287	229	2157	1651	1399	236	203	266
37.25	116	118	56	1586	2006	933	256	293	225	2174	1651	1387	217	219	222
37.5	101	136	57	1590	2031	920	254	292	221	2173	1660	1348	225	211	166
37.75	98	151	55	1593	2003	911	257	294	216	2149	1656	1343	302	171	168
38	99	158	54	1573	1987	906	258	297	214	2201	1679	1352	222	207	352
38.25	88	171	56	1591	1945	915	253	295	217	2220	1692	1359	202	237	162
38.5	78	157	55	1568	1923	931	266	285	219	2214	1689	1361	263	233	191
38.75	67	144	56	1583	1913	930	265	287	217	2194	1667	1339	177	170	257
39	61	115	57	1562	1886	887	266	293	210	2251	1643	1370	235	159	347
39.25	69	113	56	1574	1876	895	263	291	210	2212	1642	1374	344	170	325
39.5	78	107	58	1558	1822	924	257	284	215	2206	1641	1347	375	160	279
39.75	84	95	62	1570	1800	927	265	283	213	2240	1616	1357	157	176	316
40	114	86	61	1586	1784	919	259	275	211	2211	1629	1350	153	218	378
40.25	121	100	61	1641	1775	877	263	281	214	2127	1601	1359	163	220	163
40.5	131	120	58	1675	1793	880	263	274	209	2122	1607	1356	216	214	198
40.75	138	130	65	1692	1805	862	267	280	207	2160	1568	1355	182	208	276
41	127	141	66	1671	1829	861	259	273	206	2092	1572	1333	162	214	181
41.25	123	153	60	1734	1818	876	260	276	204	2111	1593	1350	168	176	271
41.5	105	155	62	1784	1815	867	252	275	207	2122	1592	1265	176	172	241
41.75	88	148	67	1896	1826	876	261	272	204	2119	1596	1320	183	164	162
42	83	159	70	1900	1831	872	259	272	207	2111	1591	1355	163	184	337
42.25	85	142	69	1830	1808	876	257	275	209	2127	1592	1376	157	189	241
42.5	98	116	73	1791	1809	876	252	273	207	2130	1583	1385	158	195	165
42.75	113	106	71	1735	1850	875	246	276	204	2133	1587	1378	169	193	174
43	122	103	78	1625	1879	892	248	277	212	2160	1553	1354	174	188	226
43.25	121	106	78	1612	1858	885	251	274	205	2217	1598	1391	169	210	259
43.5	128	110	86	1593	1891	867	241	276	205	2187	1593	1374	166	185	176
43.75	132	121	83	1605	1917	868	238	274	206	2218	1586	1384	176	179	228
44	140	130	88	1597	1879	842	243	273	201	2201	1580	1387	218	192	218
44.25	139	131	85	1575	1900	831	243	276	198	2273	1589	1341	179	209	324
44.5	140	144	96	1525	1839	829	237	272	200	2151	1578	1351	181	223	264
44.75	148	164	93	1511	1788	806	232	269	204	2134	1566	1373	168	228	341
45	163	184	90	1509	1711	807	232	265	201	2148	1578	1351	176	223	237
45.25	162	183	91	1488	1654	810	236	270	194	2126	1575	1342	176	200	246
45.5	153	174	92	1482	1706	805	226	271	199	2110	1569	1361	168	207	295
45.75	136	165	93	1509	1720	801	240	269	193	2129	1548	1351	175	204	235
46	131	150	104	1523	1737	808	243	270	198	2102	1584	1377	169	201	292
46.25	126	144	115	1514	1769	799	235	264	200	2108	1597	1358	170	201	406
46.5	111	132	121	1537	1808	795	232	263	193	2090	1599	1376	175	198	273
46.75	105	130	127	1511	1838	791	231	268	200	2078	1587	1365	184	200	192
47	99	128	130	1527	1796	778	223	266	198	2063	1572	1378	199	192	197
47.25	106	135	135	1528	1799	791	224	270	196	2065	1592	1365	204	204	303
47.5	117	131	140	1520	1780	800	230	274	194	2070	1583	1360	235	224	302
47.75	125	137	147	1520	1793	801	229	266	196	2059	1569	1335	274	241	200
48	145	153	142	1522	1751	823	233	262	198	2087	1575	1337	304	230	197
48.25	159	170	143	1516	1715	852	222	263	195	2047	1559	1335	218	225	201
48.5	165	178	133	1539	1683	891	224	262	192	2060	1566	1346	206	225	250
48.75	163	180	130	1522	1692	966	225	261	193	2044	1587	1351	208	224	294
49	155	181	134	1509	1673	1042	227	257	200	2039	1587	1367	224	223	312
49.25	149	161	130	1522	1674	1040	222	264	194	2063	1575	1336	235	211	323
49.5	136	151	140	1513	1660	1055	226	264	191	2095	1572	1329	256	202	300
49.75	129	142	144	1495	1633	1011	222	262	196	2069	1571	1355	252	208	272
50	119	130	143	1486	1653	1011	222	256	191	2034	1580	1370	227	211	236
50.25	115	132	148	1472	1665	1009	220	262	190	2013	1608	1351	219	209	194
50.5	110	131	139	1450	1641	988	221	264	193	2026	1582	1351	215	223	188
50.75	108	139	139	1459	1654	978	229	264	192	2033	1587	1357	217	223	174
51	121	145	139	1470	1672	925	225	263	197	2065	1620	1336	216	238	170
51.25	129	156	134	1468	1654	887	227	258	193	2086	1581	1363	219	241	185
51.5	144	158	131	1444	1652	874	218	261	186	2059	1566	1350	212	233	184
51.75	150	154	133	1442	1648	877	216	262	188	2084	1562	1343	224	239	194
52	153	153	135	1427	1654	872	212	263	191	2100	1562	1345	236	225	200
52.25	146	156	131	1429	1673	869	218	267	187	2105	1582	1344	233	226	211
52.5	136	148	133	1434	1682	853	216	256	189	2084	1575	1364	221	226	205
52.75	130	149	131	1431	1668	860	214	261	187	2122	1565	1358	222	223	188
53	119	148	128	1433	1673	839	211	263	188	2113	1592	1358	227	230	187
53.25	119	148	123	1424	1666	836	211	254	184	2127	1590	1361	224	225	183
53.5	116	145	123	1410	1654	831	214	256	186	2162	1584	1338	226	225	193
53.75	106	153	117	1404	1635	835	214	258	186	2110	1596	1349	233	223	230
54	110	148	113	1372	1626	834	213	261	189	2099	1581	1364	233	239	262
54.25	114	150	118	1363	1614	849	210	263	185	2096	1570	1351	235	256	259
54.5	119	153	112	1363	1604	841	205	256	185	2086	1603	1363	235	263	241
54.75	130	149	120	1362	1588	827	213	259	182	2122	1610	1371	240	258	255
55	144	154	117	1353	1565	840	208	258	185	2096	1592	1365	242	244	245
55.25	148	152	113	1358	1522	834	217	255	183	2108	1625	1346	248	251	189
55.5	144	146	117	1357	1479	838	216	256	178	2040	1608	1353	242	255	207
55.75	132	145	121	1367	1483	845	203	253	181	2073	1604	1342	249	255	208
56	129	140	120	1325	1435	846	211	254	180	2125	1595	1351	250	258	213
56.25	126	143	119	1335	1399	857	212	247	177	2081	1601	1340	259	270	210
56.5	125	149	123	1372	1397	855	207	255	180	2099	1594	1346	272	266	229
56.75	122	143	123	1409	1367	867	208	248	178	2119	1570	1368	268	273	189
57	113	142	121	1471	1364	865	204	250	181	2120	1591	1360	286	274	206
57.25	114	138	113	1471	1339	850	217	250	175	2081	1588	1345	320	272	221
57.5	111	139	123	1450	1323	829	206	248	175	2116	1598	1406	346	279	239
57.75	119	136	126	1411	1323	819	206	253	177	2102	1583	1420	352	282	276
58	125	141	126	1466	1337	798	204	250	175	2095	1583	1484	332	281	280
58.25	141	132	130	1481	1363	820	207	247	178	2105	1597	1385	322	298	295
58.5	143	132	131	1539	1352	821	209	249	177	2115	1563	1407	310	290	296
58.75	142	138	140	1570	1337	792	208	243	178	2103	1575	1352	293	287	285
59	135	140	137	1593	1320	768	205	246	179	2115	1572	1353	289	291	277
59.25	134	143	130	1610	1324	763	205	250	174	2248	1582	1367	286	291	263
59.5	130	154	133	1654	1316	739	204	245	175	2146	1641	1398	280	295	244
59.75	130	156	134	1662	1319	735	202	241	175	2168	1475	1330	277	292	205
60	134	161	135	1684	1316	724	206	243	174	2120	1431	1239	277	294	203
60.25	131	169	132	1611	1306	712	209	239	178	2096	1462	1160	276	296	211
60.5	133	154	133	1555	1298	702	206	241	171	2065	1471	1198	272	298	220
60.75	128	148	134	1502	1286	694	205	240	168	2099	1473	1195	280	290	231
61	126	151	132	1460	1288	715	204	241	169	2118	1457	1179	286	289	251
61.25	127	157	133	1418	1284	702	207	238	171	2140	1411	1166	275	303	254
61.5	132	166	129	1374	1275	702	209	238	167	2050	1411	1190	283	301	256
61.75	132	177	127	1375	1289	713	198	230	167	2045	1419	1182	289	303	274
62	138	168	121	1347	1302	705	207	227	166	2018	1439	1184	299	302	319
62.25	142	164	130	1312	1267	708	207	230	171	1998	1455	1224	293	294	353
62.5	134	149	122	1263	1299	689	200	228	166	1942	1427	1239	292	307	332
62.75	137	137	121	1256	1287	703	203	228	160	1942	1455	1193	296	297	287
63	136	136	117	1251	1296	699	204	233	167	1940	1440	1199	298	283	288
63.25	141	134	111	1233	1306	695	205	227	163	1920	1441	1202	300	293	273
63.5	138	139	112	1222	1322	703	205	227	168	2037	1420	1207	289	291	251
63.75	133	146	115	1240	1362	723	201	219	161	1977	1459	1225	290	296	240
64	129	146	120	1232	1365	714	207	225	167	1987	1474	1210	288	319	243
64.25	130	155	121	1210	1330	741	201	221	162	1961	1518	1230	284	332	237
64.5	124	146	125	1195	1321	734	198	221	157	1957	1425	1225	284	339	250
64.75	117	153	129	1184	1330	729	193	225	157	1909	1482	1229	279	337	272
65	124	154	125	1162	1369	716	198	225	163	1877	1411	1224	273	347	291
65.25	123	149	128	1148	1373	695	200	220	160	1982	1446	1225	271	358	300
65.5	124	157	129	1141	1365	687	201	225	163	1938	1434	1221	273	360	312
65.75	131	145	121	1140	1374	694	193	224	161	1842	1423	1231	271	355	335
66	136	144	123	1121	1384	664	189	221	160	1882	1443	1220	279	339	333
66.25	128	135	116	1099	1399	662	189	220	157	1839	1389	1219	275	337	331
66.5	132	136	114	1091	1434	675	194	218	159	1876	1422	1205	264	340	328
66.75	128	145	117	1048	1455	652	189	226	158	1872	1443	1201	267	338	333
67	128	149	118	961	1460	649	186	214	153	1944	1426	1235	264	346	325
67.25	121	166	123	877	1444	668	188	220	157	1988	1458	1213	272	349	326
67.5	121	179	123	825	1435	674	189	214	154	2019	1442	1228	276	356	322
67.75	123	169	121	797	1404	700	190	211	151	2001	1476	1235	269	357	307
68	121	164	124	772	1373	681	188	217	154	2061	1507	1263	271	355	283
68.25	118	157	126	733	1346	661	185	213	161	1953	1424	1235	271	354	288
68.5	117	154	127	704	1332	638	190	217	155	1933	1470	1239	279	344	267
68.75	118	156	132	690	1302	625	194	217	156	1988	1479	1261	274	341	263
69	131	148	133	669	1275	615	189	213	156	2017	1447	1283	277	342	259
69.25	143	140	133	656	1270	615	184	215	162	2019	1437	1193	284	353	258
69.5	144	134	139	637	1259	620	187	206	163	2021	1465	1227	297	366	265
69.75	149	136	142	620	1260	605	187	216	154	2007	1476	1230	312	366	259
70	149	138	147	626	1299	604	189	208	158	1992	1478	1237	316	381	261
70.25	143	150	146	623	1331	559	189	209	156	1890	1521	1240	298	382	258
70.5	132	152	147	622	1356	555	187	215	159	2041	1489	1242	295	380	261
70.75	131	166	150	609	1399	541	184	208	160	2071	1490	1263	279	384	288
71	125	174	148	617	1415	543	180	206	156	1988	1458	1280	286	380	324
71.25	123	186	153	628	1439	533	179	209	154	2054	1358	1233	287	386	361
71.5	123	176	154	629	1436	554	178	211	156	2117	1313	1262	290	383	386
71.75	124	161	156	628	1436	554	184	210	158	2136	1311	1247	295	389	400
72	121	163	156	632	1452	562	186	204	150	2082	1323	1224	295	367	400

## Sheet: Supplementary_fig4b
Time Elapsed (hours)	295-330 P301S_I328S			295-330 P301S
0	8	5	6	73	71	61
0.166667	5	4	4	102	95	80
0.333333	6	6	5	138	130	111
0.5	9	5	4	181	157	133
0.666667	10	8	7	208	187	161
0.833333	10	6	7	240	215	193
1	18	9	6	269	235	203
1.16667	24	14	10	281	250	212
1.33333	31	20	13	312	279	228
1.5	42	29	22	320	299	242
1.66667	48	35	32	318	316	264
1.83333	57	43	38	366	334	277
2	64	53	42	388	347	302
2.16667	67	59	51	418	405	327
2.33333	78	68	54	462	424	346
2.5	85	79	60	514	464	372
2.66667	96	83	67	637	638	408
2.83333	106	97	75	824	759	419
3	129	109	79	932	948	484
3.16667	157	135	87	1095	1074	508
3.33333	166	167	99	1247	1272	558
3.5	172	209	103	1388	1450	586
3.66667	176	277	113	1572	1644	656
3.83333	193	327	127	1703	1934	739
4	208	350	162	1736	2071	768
4.16667	218	398	216	2048	2074	893
4.33333	242	432	219	2454	2301	982
4.5	279	455	227	2741	2644	1075
4.66667	363	466	276	2951	2821	1191
4.83333	464	478	347	3153	3705	1180
5	529	497	387	3679	4521	1223
5.16667	584	524	459	4304	4628	1230
5.33333	609	527	459	4627	4849	1289
5.5	603	557	454	4233	4358	1568
5.66667	576	561	470	3306	4598	1852
5.83333	538	507	522	2956	5426	2110
6	535	494	563	2939	5550	2350
6.16667	524	475	722	3010	5541	2798
6.33333	564	455	758	3042	5260	2160
6.5	555	453	815	3402	5161	3121
6.66667	571	487	784	4145	5052	4145
6.83333	650	526	886	4959	5129	4055
7	725	578	904	5219	5436	3430
7.16667	759	616	986	5175	5378	4487
7.33333	866	694	1060	5267	5029	3761
7.5	998	861	1166	5255	5202	3940
7.66667	1210	804	1148	5489	6594	4083
7.83333	1215	1145	1405	4881	6708	3370
8	1256	1240	1507	5269	5863	3314
8.16667	1325	1312	1469	5421	5626	3848
8.33333	1392	1273	1523	5527	5331	3663
8.5	1470	1386	1664	5182	5471	3778
8.66667	1526	2228	1823	5351	5728	3628
8.83333	1587	1955	1836	6327	6701	3582
9	1645	1818	1906	5109	6440	4854
9.16667	1685	1730	2060	6042	6684	4411
9.33333	1734	1742	2233	5692	6212	3933
9.5	1779	1678	2451	5725	6824	4932
9.66667	1811	1758	2687	6080	6973	5406
9.83333	1972	1801	2510	6431	5333	5377
10	2110	1863	2382	6283	7126	5219
10.1667	2252	1930	2398	5711	6280	5550
10.3333	2358	1962	2550	5611	6085	5703
10.5	2448	1787	2686	5394	6775	5830
10.6667	2494	1750	2743	5928	7038	6587
10.8333	2552	2147	2766	6798	7513	6777
11	2585	2805	2975	6807	7093	6395
11.1667	2636	2478	3144	5612	5797	5873
11.3333	2687	2386	3080	6054	6422	5925
11.5	2701	2490	3120	6182	7061	5393
11.6667	2707	2763	3252	6535	7382	4959
11.8333	2723	2971	3253	6593	6464	5658
12	2741	2884	3212	5985	6168	5411
12.1667	2776	2935	3247	5443	7229	5947
12.3333	2760	2935	3250	5865	6445	5404
12.5	2795	2960	3340	6413	6373	5769
12.6667	2738	2975	3393	6749	6109	6340
12.8333	2759	2943	3285	6512	5936	6281
13	2756	2934	3406	5970	6983	6196
13.1667	2815	3076	3283	6686	6711	6827
13.3333	2856	3012	3136	6253	6569	6399
13.5	2879	3097	3108	5830	7187	6607
13.6667	2899	3162	3304	6337	7129	6870
13.8333	2880	2715	3516	6462	6456	6679
14	2950	2732	3590	7258	6984	6556
14.1667	2966	3244	3613	7684	6711	6652
14.3333	3007	3614	3827	7721	7345	6342
14.5	3068	3680	4060	8256	6827	6617
14.6667	3130	3401	3803	8031	6775	6449
14.8333	3161	3403	3778	7297	6980	6771
15	3200	3713	3927	7719	7198	6645
15.1667	3141	4005	3966	7993	8077	6743
15.3333	3116	4306	3981	7882	7630	6160
15.5	3162	3960	3994	8331	8048	6616
15.6667	3190	3505	4112	8485	7300	6592
15.8333	3205	3450	4086	8251	8417	6336
16	3222	3533	3900	7818	7249	6323
16.1667	3209	3282	3785	7453	7065	6936
16.3333	3213	3645	3790	7380	7610	6696
16.5	3230	4358	4104	7318	7297	6553
16.6667	3252	4114	4196	7387	7541	6537
16.8333	3235	4027	4289	7853	7524	6339
17	3235	4001	4150	7876	7149	6317
17.1667	3213	3964	4014	7652	7587	6438
17.3333	3241	3822	3947	8670	7293	6215
17.5	3206	4310	3803	8669	6872	6611
17.6667	3185	3879	3855	7330	7030	6631
17.8333	3157	3851	3946	7644	7745	6079
18	3144	4287	4060	8927	6624	6417
18.1667	3165	4535	4105	8707	6859	6265
18.3333	3309	4720	4051	8234	7469	6111
18.5	3466	4673	3819	7712	6938	6231
18.6667	3521	4400	3882	7734	7284	6510
18.8333	3536	4418	4047	7671	6823	5719
19	3609	4542	4103	8107	6999	5704
19.1667	3765	4220	4085	7139	7439	6368
19.3333	3822	4183	3967	7316	6731	6264
19.5	3928	4762	4036	7607	6968	5509
19.6667	4317	4385	4228	7719	6965	5973
19.8333	4335	4548	4278	7693	7038	6163
20	4354	4433	4376	7121	6807	5987
20.1667	4258	3887	4535	7755	7450	6431
20.3333	4277	3938	4744	6808	6632	5982
20.5	4144	3964	4710	6552	7494	5892
20.6667	3779	4206	4592	7063	6132	5870
20.8333	4027	4947	4514	7191	7035	6237
21	4090	4897	4357	6798	7669	6233
21.1667	4324	5335	4333	7029	6699	5829
21.3333	4416	5351	4242	7497	6457	5792
21.5	4444	4939	4325	7933	7515	6268
21.6667	4391	4273	4374	8293	6868	5975
21.8333	4362	4047	4380	7508	6850	6044
22	4010	3962	4300	7044	6258	6120
22.1667	3963	4363	4169	6570	7552	6327
22.3333	3940	4409	4011	6393	7277	6036
22.5	3934	4501	3939	6920	7189	6057
22.6667	3966	4315	3877	6568	7555	5711
22.8333	4117	4314	3715	6256	7068	6287
23	4018	4540	3632	7616	6891	6209
23.1667	5012	4589	3623	7768	7411	5628
23.3333	4309	4145	3773	6846	6598	5732
23.5	4697	4114	3870	6446	6366	6089
23.6667	5246	4057	4054	6856	6115	6307
23.8333	5092	4200	4390	7591	6284	6134
24	3887	4200	4440	6083	6553	5487
24.1667	4517	4476	4423	6124	6789	5361
24.3333	4406	4482	4437	7037	6028	5350
24.5	4332	4485	4233	7708	6045	5371
24.6667	5291	4417	4305	6418	6589	5664
24.8333	5476	3998	4457	7428	7197	5430
25	5271	4042	4600	6784	6866	5793
25.1667	4874	3986	4557	6322	6223	6141
25.3333	5595	4313	4695	6012	7223	5982
25.5	5360	4487	4551	7045	7096	6187
25.6667	5228	4466	4417	7252	6682	5644
25.8333	5410	4462	4115	6841	6892	6032
26	5938	3875	3874	7131	7014	6147
26.1667	5506	3739	3869	7416	6756	6143
26.3333	5119	4103	3930	6711	6946	6195
26.5	5547	4267	4130	7187	7236	5796
26.6667	5498	4083	4155	7324	6480	5877
26.8333	5335	4154	4076	6518	7162	6017
27	5305	4148	4075	7037	7109	5940
27.1667	5385	4326	4060	7024	6773	5978
27.3333	5502	4490	4039	6711	6341	5878
27.5	5305	4356	4008	7173	6190	6146
27.6667	5459	3744	4216	6516	6680	6010
27.8333	5632	3363	4156	6326	5858	6093
28	5061	3499	4335	8167	6140	5861
28.1667	5297	3733	4389	6330	5912	6034
28.3333	5608	3841	4569	6360	5495	5951
28.5	5550	3883	4661	6877	5904	5972
28.6667	5456	3830	4651	6305	6006	5833
28.8333	5562	3605	4602	6634	5743	5523
29	5617	3375	4547	6442	6120	5857
29.1667	5700	3784	4471	6133	6081	5879
29.3333	5863	4078	4320	6124	6172	5963
29.5	5891	4241	4252	7197	6220	5714
29.6667	5542	4249	4251	6890	6812	5902
29.8333	5541	3940	4277	5978	6452	6061
30	5712	3390	4412	7065	6516	5768
30.1667	5889	4438	4614	6801	6472	5898
30.3333	5786	4206	4685	7416	6520	5505
30.5	5826	4421	4465	6909	6216	5581
30.6667	5898	4446	4407	7414	6720	5796
30.8333	5977	4420	4354	7208	6105	5688
31	5980	4138	4277	7920	6585	5430
31.1667	5940	4561	4305	7774	6557	5187
31.3333	5961	4370	4302	6455	5965	5399
31.5	5970	4312	4305	6831	5542	5744
31.6667	5940	4538	4326	7467	6010	5535
31.8333	5965	4567	4313	7686	5796	5418
32	5936	4506	4418	6486	6092	5467
32.1667	5845	3878	4443	6810	5656	6427
32.3333	5918	3755	4462	7099	6040	6450
32.5	5744	4152	4485	6703	5980	5272
32.6667	5832	5047	4529	6433	5980	5248
32.8333	5593	4036	4568	7210	5951	5822
33	5556	3830	4545	6929	6118	5827
33.1667	5579	3805	4332	6568	6347	5745
33.3333	5621	4064	4400	7069	6286	5937
33.5	5568	4060	4458	8035	6055	5862
33.6667	5609	3940	4507	7004	6336	5507
33.8333	5387	4119	4634	6532	6707	5211
34	5075	4441	4640	5646	6156	5232
34.1667	5445	4345	4596	7037	6524	4824
34.3333	6222	4716	4469	6879	6368	5435
34.5	6244	4795	4326	7381	6052	5259
34.6667	6370	4740	4469	6427	6105	5758
34.8333	6437	4341	4475	6709	6548	5728
35	5906	3451	4350	7115	6785	5580
35.1667	5694	3685	4324	7250	6071	5665
35.3333	6289	4036	4232	6988	6501	5572
35.5	6417	4271	4212	7621	6492	5410
35.6667	6536	4638	4270	6536	6151	5268
35.8333	5814	4542	4270	6178	6532	5455
36	5458	4130	4402	6306	6001	5472
36.1667	5466	4254	4395	8321	6077	5563
36.3333	5802	4269	4464	7170	6341	5362
36.5	5886	4115	4393	7439	6190	5437
36.6667	6303	4124	4362	7718	6669	5668
36.8333	6470	3826	4302	6865	6147	5829
37	6584	4042	4282	8168	5650	5489
37.1667	6058	4597	4257	6058	6889	5500
37.3333	5012	4775	4213	6014	6482	5540
37.5	4891	4723	4229	6355	5978	5696
37.6667	4865	4522	4252	7308	6029	5835
37.8333	4860	4429	4272	7217	6460	5874
38	4782	4513	4256	7134	6756	5810
38.1667	4744	4400	4239	7290	6849	5824
38.3333	4772	4561	4280	7723	6004	5943
38.5	4821	4780	4286	6989	5927	5840
38.6667	4720	4936	4313	6847	6354	5821
38.8333	5809	4526	4281	6617	6028	5997
39	6422	4540	4281	6901	5978	6133
39.1667	6302	4850	4301	6809	5744	5911
39.3333	6404	4387	4316	6750	6054	5508
39.5	6307	4440	4319	7385	5556	5550
39.6667	5866	4200	4345	6765	5937	5808
39.8333	5612	4979	4307	6987	5748	5991
40	5452	4733	4275	6764	6164	5245
40.1667	5379	4493	4280	7561	6266	5586
40.3333	6054	4722	4356	6186	6177	5672
40.5	6670	4597	4339	7054	5907	5958
40.6667	6774	4231	4379	7029	6119	5800
40.8333	6119	4360	4356	6160	6137	5785
41	5945	4524	4306	6472	5756	5740
41.1667	5707	4614	4324	7092	6052	5878
41.3333	5563	4649	4269	6226	6696	6139
41.5	5254	4555	4216	6448	5670	5656
41.6667	4952	4540	4179	7845	6361	5421
41.8333	5139	4481	4152	7069	6312	5408
42	5657	4294	4123	7183	5469	5563
42.1667	6320	4259	3984	6384	6737	5403
42.3333	6543	4610	3982	7763	6545	5413
42.5	6344	4547	3933	6712	6254	5381
42.6667	5751	4096	4155	6682	6215	5493
42.8333	5070	3992	4353	6631	6089	5391
43	4883	4160	4308	6702	6009	5519
43.1667	4579	4340	4408	7229	6920	5228
43.3333	5133	4767	4424	7044	6266	4941
43.5	6253	4707	4475	5650	6152	5490
43.6667	6628	4443	4534	5951	6595	5869
43.8333	6784	4143	4504	6683	6049	6040
44	6794	3829	4552	6622	5946	5906
44.1667	6477	4561	4559	6823	5966	5836
44.3333	5953	4665	4559	6715	6176	5923
44.5	4968	4965	4556	7051	5863	5632
44.6667	4551	4999	4563	7503	5683	5553
44.8333	4423	5020	4653	6314	5807	5519
45	4788	4936	4682	6576	6112	5810
45.1667	5610	4880	4668	6405	5598	5637
45.3333	6883	4711	4663	7555	6171	5654
45.5	6576	4475	4694	6799	6167	5527
45.6667	6357	4662	4661	7181	6431	5322
45.8333	6334	4472	4630	7120	6528	5424
46	6507	4131	4644	7408	5656	5830
46.1667	6513	4236	4619	5764	6015	6009
46.3333	6219	4436	4616	6693	5994	5526
46.5	6234	4759	4583	6578	5897	5181
46.6667	6211	4764	4533	7081	5384	5283
46.8333	6204	4624	4513	7749	6708	5725
47	6100	4547	4485	5978	6695	5683
47.1667	6097	4571	4476	7040	6072	5138
47.3333	5978	4620	4470	7200	6536	5120
47.5	6102	4555	4498	7846	6270	5445
47.6667	6043	4551	4509	6824	5753	5798
47.8333	5885	4617	4546	5991	6280	5678
48	5878	4578	4488	7341	6186	5755
48.1667	5793	4493	4558	6517	5831	5845
48.3333	5944	4557	4607	6329	6003	5745
48.5	5758	4537	4621	7179	6029	5644
48.6667	5845	4569	4688	7161	5936	5453
48.8333	5797	4760	4692	6233	6088	5727
49	5818	5362	4815	6608	5988	5462
49.1667	5786	5470	4776	6255	5971	5884
49.3333	5839	6349	4772	7110	6356	5765
49.5	5924	6189	4773	7062	5872	5808
49.6667	5939	6147	4707	5909	6089	6061
49.8333	5953	6060	4679	6557	6429	6005
50	5965	5147	4676	6964	6208	5672
50.1667	5955	5526	4704	6374	5900	5724
50.3333	5998	6073	4683	6781	6106	5297
50.5	6151	5807	4687	6672	6605	5442
50.6667	6165	5162	4666	5581	5853	5298
50.8333	6175	5341	4681	7235	6046	5328
51	6201	4985	4677	6442	6172	5239
51.1667	6276	4984	4645	6453	6048	5389
51.3333	6293	4967	4637	5599	6530	5337
51.5	6356	4967	4638	6151	6021	5434
51.6667	6250	4947	4555	6822	5954	5443
51.8333	6303	4917	4560	6574	6293	5324
52	6221	4823	4554	6303	6369	5461
52.1667	6270	4833	4576	6379	5636	5065
52.3333	6325	4831	4536	5801	6427	4983
52.5	6299	5099	4503	5731	6571	5479
52.6667	6301	5607	4613	6162	6034	5189
52.8333	6408	5656	4607	6864	6093	5519
53	6375	5774	4625	6912	5693	5824
53.1667	6477	5787	4598	7249	6115	5520
53.3333	6524	5938	4654	6996	6355	5455
53.5	6500	5791	4711	6357	6574	5191
53.6667	6313	5420	4733	6948	6132	5238
53.8333	6081	5359	4721	6352	6099	5704
54	5896	5350	4764	5618	6809	5685
54.1667	5896	5360	4771	5593	6590	5263
54.3333	5812	5304	4792	6065	5575	5388
54.5	5694	5287	4750	6085	6047	5448
54.6667	5567	5243	4740	6195	6323	5348
54.8333	5529	5255	4743	6738	5696	5623
55	5516	5308	4750	6832	5981	5700
55.1667	5564	5360	4789	6782	5789	5524
55.3333	5623	5357	4822	6150	5999	5732
55.5	5639	5258	4764	5803	5851	5209
55.6667	5575	5239	4732	5916	5575	5150
55.8333	5622	5077	4740	5824	6585	5229
56	5639	4813	4747	5777	5884	5787
56.1667	5576	4464	4743	5424	6297	5157
56.3333	5618	4454	4705	5225	6089	5095
56.5	5705	4422	4739	5604	5510	4768
56.6667	5878	4461	4775	5843	6408	5309
56.8333	6045	4456	4752	5761	5548	5987
57	6283	4485	4762	5735	5547	6130
57.1667	6336	4540	4791	5575	6229	5022
57.3333	6399	4608	4776	5481	5195	4956
57.5	6346	4687	4738	5483	5787	5232
57.6667	6347	4705	4718	5585	5468	5602
57.8333	6452	4787	4686	5653	5985	5610
58	6486	4804	4688	5798	6019	5118
58.1667	6490	4870	4600	5929	5667	5173
58.3333	6401	4883	4600	5681	6420	5529
58.5	6405	4881	4592	5536	5660	5284
58.6667	6476	4910	4613	5439	6179	5384
58.8333	6414	4939	4611	5589	6148	5186
59	6429	4941	4597	5551	5904	5247
59.1667	6426	4961	4565	5463	6003	5310
59.3333	6517	4997	4551	5264	6394	5356
59.5	6642	4958	4507	5227	5774	5505
59.6667	6572	4978	4503	5098	6195	5328
59.8333	6604	4975	4489	4989	5923	5262
60	6639	4881	4454	5125	6433	5342
60.1667	6605	4845	4491	5132	5348	5504
60.3333	6597	4862	4479	5194	6118	5557
60.5	6527	4871	4498	5083	6426	5227
60.6667	6521	4896	4495	5108	5782	5366
60.8333	6601	4870	4506	5104	6673	5055
61	6468	4872	4510	5083	5495	5055
61.1667	6355	4874	4551	5027	5881	5498
61.3333	6354	4860	4585	5051	5894	5646
61.5	6313	4865	4509	5058	5795	5638
61.6667	6366	4845	4553	4974	5658	5424
61.8333	6411	4824	4563	5015	6095	5112
62	6470	4817	4479	5019	5822	5404
62.1667	6547	4829	4527	4988	5979	5023
62.3333	6586	4781	4473	5001	5976	5236
62.5	6725	4802	4562	5026	5938	5768
62.6667	6881	4804	4573	5054	6497	5559
62.8333	6928	4812	4571	5052	6197	5600
63	6928	4837	4425	5037	5568	5710
63.1667	6858	4819	4397	5040	6012	5559
63.3333	6766	4860	4367	5050	6193	4847
63.5	6781	4824	4338	4951	5647	5135
63.6667	6732	4843	4288	5009	5858	5159
63.8333	6641	4824	4301	4999	6065	4896
64	6618	4822	4328	4958	5636	4969
64.1667	6424	4847	4353	4962	6574	4852
64.3333	6317	4828	4358	4967	6082	5054
64.5	6204	4816	4342	5011	6075	5270
64.6667	6103	4819	4366	4950	6313	5431
64.8333	6096	4805	4454	4962	5628	5282
65	6012	4812	4453	4902	5526	5051
65.1667	6080	4786	4454	4887	6412	5089
65.3333	6071	4789	4409	4882	5917	4981
65.5	5950	4812	4362	4887	6199	5180
65.6667	5921	4819	4309	4914	5846	5371
65.8333	5878	4809	4255	5120	6033	5421
66	5852	4866	4129	5175	6543	5364
66.1667	5817	4838	4091	5318	5971	5059
66.3333	5795	4804	4016	5336	6070	5340
66.5	5733	4818	3924	5362	5878	5412
66.6667	5662	4808	3870	5373	5842	5517
66.8333	5587	4818	3834	5311	6179	5286
67	5606	4761	3769	5287	6068	5247
67.1667	5535	4708	3717	5286	5622	5224
67.3333	5574	4731	3739	5275	6008	4943
67.5	5631	4748	3725	5223	6476	4661
67.6667	5678	4729	3680	5103	5556	4870
67.8333	5749	4730	3681	5046	6360	5407
68	5854	4691	3683	5026	5830	5345
68.1667	5854	4710	3684	5003	5561	5197
68.3333	5764	4697	3707	4935	6412	5009
68.5	5721	4712	3723	4898	6394	5146
68.6667	5716	4778	3768	4885	5769	5232
68.8333	5669	5061	3897	4909	5982	5022
69	5675	5047	3884	4886	5940	5040
69.1667	5641	5056	3947	4866	5866	4735
69.3333	5662	5049	3983	4863	6063	4921
69.5	5615	5043	3973	4861	5454	4983
69.6667	5647	5053	3987	4847	5654	4912
69.8333	5625	4996	3952	4848	5952	4856
70	5617	5041	3943	4837	5785	4830
70.1667	5615	5016	3987	4815	5784	5034
70.3333	5639	5031	3934	4860	5913	5166
70.5	5710	5046	3944	4882	5803	4948
70.6667	5704	5046	4012	4891	6433	5032
70.8333	5782	5062	4024	4943	6203	4895
71	5790	5034	4009	4907	5944	4802
71.1667	5824	5046	3960	4879	6306	4908
71.3333	5889	5005	3952	4920	6112	5130
71.5	5900	5050	3971	4906	6072	4993
71.6667	5946	5005	4031	4943	6364	4752
71.8333	5900	4976	3994	4935	6160	4924
72	5917	4949	4042	4915	6234	5174

[truncated: 4 more sheets: Supplementary_fig4c, Fig5e, Supplementary_fig5c, Supplementary_fig5d]
