# Supplementary material for: FTD-tau S320F mutation stabilizes local structure and allosterically promotes amyloid motif-dependent aggregation
Source: Research Square preprint supplement (doi:10.21203/rs.3.rs-1950269/v1), 2022-08-22
Supplement: Supplementary file 2 [file 3b4248d656224e0537905e1e.xlsx]

## Sheet: Legend
Description of the column headers
Id	Assigned peptides and cross-linking sites within the peptide sequences. The longer peptide is designated as (a)lpha, the shorter as (b)eta. Multiple positions are given in case of ambiguous assignments.
Protein1	SwissProt/UniProt accession number and identifier of the protein 1 (containing peptide desginated as alpha).
Protein1	SwissProt/UniProt accession number and identifier of the protein 2 (containing peptide desginated as beta).
XL Type	Type of cross-linked peptide
AbsPos1	Position in the protein sequence of protein 1, multiple positions are given in case of ambiguous assignments.
AbsPos2	Position in the protein sequence of protein 2, multiple positions are given in case of ambiguous assignments.
deltaAA	Delta between the absolute positions of the cross-linked residues
Mr	Molecular mass calculated from experimental m/z and z (neutral mass).
Mz	Experimentally observed mass-to-charge ratio of the precursor ion in Da.
z	Experimentally observed precursor charge.
Error [ppm]	Deviation between experimental and theoretical mass in ppm.
nseen	Frequency of modification
Id-score	Identification score as assigned by xQuest.

## Sheet: Fig4e_4i
	Normalized frequency
XL/LL pairs	WT					S320F					S320F/I328S
259 274	1.5528	0.740741	1.28866	0.259067	0.738916	1.5674	2.80702	1.67224	2.42215	0.70922	0.254453	0.540541	0.761421	0.564972	0.722892
259 280	0.621118	0.493827	0.515464	0.518135	0.492611	0.626959	0.701754	0.668896	0.692042	0.70922	0.508906	0.540541	0.507614	0.564972	0.481928
259 281	1.24224	0.740741	1.80412	0.777202	0.738916	0	0	1.67224	0	1.41844	0	0	0.507614	1.41243	0.722892
259 290	0.621118	0.987654	0.773196	0.777202	0.492611	0.626959	1.05263	0.334448	0.346021	0.35461	1.01781	1.08108	0.507614	0.282486	0.722892
259 321	0.931677	0.493827	0.773196	0.777202	0.492611	0	0.701754	0.668896	0	0.35461	0.508906	0	0.253807	0.564972	0.481928
259 343	0.310559	0.246914	0.257732	0.259067	0	0.31348	0.350877	0.334448	0.692042	0.70922	0.508906	0.27027	0.253807	0	0
259 347	0.621118	0.740741	0.257732	0.259067	0.246305	0	0.701754	0.334448	0.692042	0.70922	0.508906	0.540541	0.507614	0.564972	0.722892
259 369	0.621118	0.493827	0.257732	0.777202	0.492611	0	0	0	0	0	0	0	0.761421	0.564972	0.722892
267 280	1.86335	0.740741	1.28866	1.03627	0.492611	1.25392	0.701754	0.668896	1.03806	3.19149	0.254453	0.810811	0.761421	1.12994	1.20482
267 281	1.5528	2.96296	1.28866	1.03627	1.72414	3.1348	3.15789	3.67893	5.19031	3.19149	3.56234	3.24324	2.28426	3.67232	2.16867
267 290	0.931677	0.246914	0.515464	0.777202	0.738916	0.31348	0.701754	0.668896	0.346021	1.41844	0.763359	0	0.761421	0.847458	0.240964
267 294	0.621118	0.740741	0.773196	0.777202	0.738916	0.940439	0.701754	0.668896	0.692042	1.06383	0.508906	0.27027	0	0.564972	0.481928
267 343	0.931677	0	0	0.518135	0	0.626959	0.701754	1.00334	0.692042	1.06383	0.508906	0.27027	0.507614	0.564972	0
267 369	0.310559	0.246914	0.257732	0.259067	0.246305	0.626959	0	0.668896	0.346021	0	0	0	0	0	0
267 370	0.621118	0.493827	0.515464	0.518135	0.246305	0.626959	0.701754	1.00334	0.692042	0.70922	0.508906	0.540541	0.761421	0.564972	0.722892
274 281	3.41615	0	0.515464	1.29534	0.492611	0.31348	0.701754	0.334448	1.03806	0.35461	0.254453	0.540541	0.507614	0.564972	0.240964
274 290	0.310559	0.246914	0.257732	0.259067	0.246305	0.626959	1.05263	1.00334	1.03806	1.06383	1.27226	0.540541	1.52284	0.564972	0.481928
280 280	0	0	0	0	0	0.626959	0.350877	0.334448	0.692042	0.35461	0.508906	0.540541	0.507614	0	0
280 281	5.2795	4.69136	4.89691	4.66321	4.6798	5.64263	0	6.35452	6.57439	6.73759	4.58015	4.86486	4.56853	3.9548	4.57831
280 290	1.86335	0.740741	1.03093	0.777202	0.492611	0.31348	0.701754	1.33779	2.07612	1.41844	0.254453	0.810811	1.01523	1.12994	1.44578
280 294	0.310559	0	0	0.259067	0.246305	0.626959	0.350877	0.334448	0.346021	0.35461	0	0.540541	0.507614	0.564972	0.481928
280 298	0.931677	0.740741	0.773196	0.259067	0.738916	0.626959	0.701754	1.00334	1.03806	1.06383	0.763359	0.810811	0.761421	0.847458	0.963855
280 311	0.621118	0.493827	0.257732	0.518135	0.492611	0.626959	0.701754	0.668896	0.692042	0.70922	0.254453	0.540541	0.253807	0.564972	0.240964
280 331	0.931677	0.493827	0.773196	0.777202	0.246305	0	1.05263	1.33779	0	0	0.254453	0.27027	0.253807	0.564972	0
280 343	0.621118	0.493827	0.515464	0.518135	0.492611	0.31348	0.701754	0.334448	0.692042	0.35461	0.508906	0.540541	0.507614	0.564972	0.481928
280 347	0.621118	0.493827	0.515464	0.518135	0.492611	0.626959	0.701754	0.668896	0.692042	0.35461	0.508906	0.540541	0.507614	0.564972	0.481928
280 369	0	0	0	0.518135	0.492611	0	0	0	0.692042	0.70922	0.254453	0.27027	0.507614	0.564972	0.481928
280 370	0.310559	0.493827	0.515464	0.518135	0.246305	0.626959	0.701754	0.668896	0.346021	0	0.508906	0	0.253807	0.564972	0.240964
281 294	0.931677	1.7284	1.54639	1.5544	1.47783	0.626959	1.40351	1.00334	0.692042	0	2.03562	2.7027	2.28426	0.847458	1.44578
281 298	1.86335	1.23457	0.773196	1.03627	1.47783	0.940439	2.45614	1.33779	1.38408	2.48227	2.03562	1.08108	0.761421	1.41243	1.20482
281 311	1.24224	0.493827	0.515464	0.518135	0.738916	0	0	0.668896	0	0.35461	0	0	0	0.564972	0
281 347	0.931677	0.740741	0.515464	0.259067	0.246305	0.31348	0.701754	0.668896	0.692042	0.70922	0.254453	0.540541	0.507614	0.564972	0.240964
281 353	0.931677	0.987654	0.515464	0.259067	0.492611	0	0.701754	0	1.03806	0.35461	0.254453	0.540541	0.507614	0.564972	0.481928
281 369	0	0	0	0	0	0.626959	0	1.33779	0.692042	0.70922	0.508906	1.08108	1.01523	0.282486	0.481928
290 294	3.10559	1.7284	1.80412	1.5544	1.47783	1.25392	2.10526	2.00669	2.07612	2.12766	1.78117	1.08108	1.52284	2.82486	1.92771
290 298	0.621118	1.48148	0.257732	0.518135	0.985222	0.626959	1.05263	2.00669	0.692042	0.70922	0	1.08108	1.26904	1.69492	1.20482
294 298	0.621118	0.987654	1.54639	0.518135	1.47783	1.5674	0.701754	1.00334	1.03806	0.70922	1.52672	0.810811	0.761421	0.564972	1.44578
294 343	0.310559	0.246914	0.257732	0.259067	0.246305	0.31348	0.350877	0	0.346021	0.35461	0	0.27027	0	0.282486	0.240964
311 317	15.2174	30.1235	29.1237	31.3472	36.9458	39.4984	38.5965	32.4415	25.9516	35.461	33.0789	31.3514	27.4112	22.8814	29.3976
317 321	1.86335	0.987654	0.515464	1.29534	0.985222	0	0	0	0	0	0	0	0	0	0
321 331	11.1801	12.5926	12.3711	13.7306	10.5911	2.82132	2.10526	3.34448	2.07612	3.19149	3.56234	2.97297	2.79188	5.64972	3.61446
321 343	1.5528	1.48148	1.28866	1.29534	1.23153	0.626959	1.05263	0	0.346021	0.35461	0.508906	0.27027	0.761421	0	0.240964
331 343	2.48447	2.46914	3.09278	2.84974	2.46305	1.88088	1.75439	2.34114	0.692042	1.77305	4.3257	4.32432	3.04569	6.49718	6.0241
331 347	0	0	0	0.259067	0.246305	0	0.350877	0.334448	0	0	0.254453	0.810811	0.253807	0.282486	0.240964
340 343	0.931677	0.987654	0.515464	0.518135	0.985222	1.25392	1.75439	0.668896	0.692042	1.06383	0	0	0.253807	0.564972	0.481928
340 347	0.621118	0.740741	0.515464	0.259067	0.246305	0.31348	0.350877	0.334448	0.692042	0.70922	0	0	0.253807	0.282486	0
343 353	7.45342	4.44444	5.15464	5.44041	4.92611	4.07524	3.50877	3.01003	4.49827	4.25532	6.61578	5.13514	6.59898	5.08475	5.06024
343 369	1.86335	1.7284	1.03093	1.03627	0.985222	1.88088	1.40351	2.00669	1.03806	1.41844	1.52672	1.35135	1.52284	2.54237	0.963855
343 370	1.24224	0.740741	1.03093	1.03627	1.47783	0.940439	0.701754	0.334448	1.03806	1.77305	0.763359	1.35135	0.507614	0.564972	0.722892
347 353	3.10559	2.22222	2.31959	2.07254	2.21675	2.50784	2.80702	4.68227	4.49827	1.77305	2.03562	4.05405	3.80711	5.36723	2.89157
347 369	1.86335	1.7284	1.28866	1.03627	0.985222	0.940439	2.10526	2.00669	0.346021	1.77305	1.78117	1.35135	2.28426	1.69492	1.68675
347 370	0.310559	1.48148	0.515464	0.777202	0.738916	0.626959	0.701754	0.334448	0.692042	0.70922	0.763359	1.35135	0.507614	0.847458	0.722892
353 369	2.79503	4.19753	4.63918	4.14508	3.69458	5.64263	3.50877	3.67893	6.22837	0	3.56234	2.97297	5.83756	4.23729	3.37349
353 370	2.17391	2.71605	1.54639	1.81347	1.47783	2.19436	1.75439	1.00334	4.49827	3.19149	4.3257	2.7027	2.28426	4.80226	3.37349
369 370	5.59006	2.22222	6.70103	4.14508	3.69458	6.58307	6.66667	4.68227	7.61246	4.96454	8.90585	3.51351	7.86802	5.64972	7.46988
369 375	0.621118	0.246914	0	0.259067	0.246305	0.31348	0.701754	0.334448	0.692042	0	0.254453	8.37838	4.56853	0.564972	5.54217
FDR	0.0192308	0.0204082	0.0204082	0.0185185	0.0192308	0.0217391	0.0208333	0.02	0.0204082	0.0212766	0.0217391	0.0217391	0.0196078	0.0196078	0.0208333

## Sheet: Fig4f_WT1
Id	Protein1	Protein2	XLType	AbsPos1	AbsPos2	deltaAA	Mr	Mz	z	Error_rel[ppm]	nseen	ld-Score
VQIINKKLDLSNVQSK-K6-K7	WT_Tau	-	intralink	280	281	1	1964.13	655.718	3	0.1	17	50.37
HQPGGGKVQIINK-K7-155	WT_Tau	-	monolink	274	n/a	-	1529.87	510.964	3	-1.1	12	49.38
HVPGGGSVQIVYKPVDLSK-K13-156	WT_Tau	-	monolink	311	n/a	-	2135.16	712.729	3	-0.1	435	47.91
HVPGGGSVQIVYKPVDLSKVTSK-K19-155	WT_Tau	-	monolink	317	n/a	-	2549.42	638.363	4	-1.3	6	47.38
CGSLGNIHHKPGGGQVEVK-K10-155	WT_Tau	-	monolink	331	n/a	-	2128.08	533.029	4	-1.7	17	46.8
DNIKHVPGGGSVQIVYKPVDLSK-K4-156	WT_Tau	-	monolink	298	n/a	-	2605.41	869.478	3	-0.8	36	46.73
DNIKHVPGGGSVQIVYKPVDLSK-K4-155	WT_Tau	-	monolink	298	n/a	-	2604.43	869.149	3	-1.6	13	46.66
LDLSNVQSKCGSK-VQIINKK-a9-b6	WT_Tau	WT_Tau	intra-protein xl	290	280	10	2414.32	805.78	3	-1.2	6	46.38
LDLSNVQSKCGSK-K9-155	WT_Tau	-	monolink	290	n/a	-	1589.81	530.943	3	-2.3	1	45.88
HVPGGGSVQIVYKPVDLSKVTSK-K19-156	WT_Tau	-	monolink	317	n/a	-	2550.4	638.608	4	-1.4	35	45.59
HVPGGGSVQIVYKPVDLSKVTSK-K19-K23	WT_Tau	-	intralink	317	321	4	2532.39	634.106	4	-0.5	6	44.94
HQPGGGKVQIINK-K7-156	WT_Tau	-	monolink	274	n/a	-	1530.85	511.291	3	-0.8	11	44.77
IGSLDNITHVPGGGNKK-K16-156	WT_Tau	-	monolink	369	n/a	-	1861.99	621.67	3	-1	90	44.47
HVPGGGSVQIVYKPVDLSK-K13-155	WT_Tau	-	monolink	311	n/a	-	2134.18	712.401	3	-0.9	458	44.35
VQIINKK-LDFKDR-a6-b4	WT_Tau	WT_Tau	intra-protein xl	280	347	67	1772.02	444.012	4	-1.6	2	43.33
HQPGGGKVQIINK-SKIGSTENLK-a7-b2	WT_Tau	WT_Tau	intra-protein xl	274	259	15	2588.43	518.693	5	-0.4	5	42.35
CGSLGNIHHKPGGGQVEVKSEK-K19-155	WT_Tau	-	monolink	340	n/a	-	2472.25	619.071	4	-1.4	8	42.26
IGSLDNITHVPGGGNKKIETHK-K16-K17	WT_Tau	-	intralink	369	370	1	2452.3	818.443	3	-0.9	18	42.23
IETHKLTFR-K5-155	WT_Tau	-	monolink	375	n/a	-	1298.73	433.919	3	-3	1	42.19
CGSLGNIHHKPGGGQVEVKSEK-K19-156	WT_Tau	-	monolink	340	n/a	-	2473.24	825.42	3	-0.8	19	42.04
KLDLSNVQSKCGSK-K10-156	WT_Tau	-	monolink	290	n/a	-	1718.89	573.97	3	-0.9	5	41.07
KLDLSNVQSKCGSK-SKIGSTENLK-a10-b2	WT_Tau	WT_Tau	intra-protein xl	290	259	31	2776.46	926.496	3	-0.1	1	40.89
IGSTENLKHQPGGGK-VQIINKK-a8-b6	WT_Tau	WT_Tau	intra-protein xl	267	280	13	2501.4	834.807	3	-0.1	6	40.87
CGSLGNIHHKPGGGQVEVK-K10-156	WT_Tau	-	monolink	331	n/a	-	2129.07	710.697	3	-0.5	16	40.83
IGSLDNITHVPGGGNKK-K16-155	WT_Tau	-	monolink	369	n/a	-	1861.01	621.343	3	-1.4	286	40.8
LDLSNVQSKCGSKDNIK-K9-K13	WT_Tau	-	intralink	290	294	4	2043.03	682.018	3	-0.3	1	40.72
LDLSNVQSKCGSKDNIK-K13-156	WT_Tau	-	monolink	294	n/a	-	2061.04	688.021	3	-1.4	2	40.65
IGSLDNITHVPGGGNKK-K17-156	WT_Tau	-	monolink	370	n/a	-	1861.99	621.67	3	-1	40	40.35
IGSLDNITHVPGGGNKK-K17-155	WT_Tau	-	monolink	370	n/a	-	1861.01	621.343	3	-1.4	74	39.98
KLDLSNVQSK-SEKLDFK-a1-b3	WT_Tau	WT_Tau	intra-protein xl	281	343	62	2134.15	534.545	4	-0.7	1	39.85
CGSLGNIHHKPGGGQVEVKSEK-K22-156	WT_Tau	-	monolink	343	n/a	-	2473.24	825.421	3	-0.1	3	39.77
KLDLSNVQSKCGSK-K10-155	WT_Tau	-	monolink	290	n/a	-	1717.9	573.642	3	-2.2	2	39.74
LDLSNVQSKCGSK-SKIGSTENLK-a9-b2	WT_Tau	WT_Tau	intra-protein xl	290	259	31	2648.37	663.1	4	0.4	1	39.39
HVPGGGSVQIVYKPVDLSKVTSK-K13-156	WT_Tau	-	monolink	311	n/a	-	2550.41	638.61	4	0.5	15	39.02
KIETHKLTFR-K6-156	WT_Tau	-	monolink	375	n/a	-	1427.81	476.945	3	-1.2	2	38.74
VQSKIGSLDNITHVPGGGNK-LDFKDR-a4-b4	WT_Tau	WT_Tau	intra-protein xl	353	347	6	2950.55	738.645	4	-0.8	7	38.51
VQSKIGSLDNITHVPGGGNK-K4-155	WT_Tau	-	monolink	353	n/a	-	2175.16	726.062	3	-1.4	18	38.5
VTSKCGSLGNIHHKPGGGQVEVK-K4-156	WT_Tau	-	monolink	321	n/a	-	2544.31	509.87	5	-0.6	41	38.35
IGSTENLKHQPGGGK-K8-156	WT_Tau	-	monolink	267	n/a	-	1677.87	560.297	3	-1.3	8	38.19
LDLSNVQSKCGSKDNIK-K9-155	WT_Tau	-	monolink	290	n/a	-	2060.05	687.693	3	-1.7	3	37.9
VTSKCGSLGNIHHKPGGGQVEVK-K4-155	WT_Tau	-	monolink	321	n/a	-	2543.32	848.782	3	-2.8	9	37.84
CGSLGNIHHKPGGGQVEVK-SEKLDFKDR-a10-b3	WT_Tau	WT_Tau	intra-protein xl	331	343	12	3247.64	812.917	4	-0.8	3	37.47
VTSKCGSLGNIHHKPGGGQVEVK-SEKLDFK-a4-b3	WT_Tau	WT_Tau	intra-protein xl	321	343	22	3391.75	679.358	5	-0.8	4	37.46
SEKLDFKDR-K3-155	WT_Tau	-	monolink	343	n/a	-	1291.67	431.566	3	-3	6	37.36
CGSLGNIHHKPGGGQVEVKSEK-LDFKDR-a19-b4	WT_Tau	WT_Tau	intra-protein xl	340	347	7	3247.64	650.536	5	-0.7	2	37.04
HQPGGGKVQIINKK-K7-155	WT_Tau	-	monolink	274	n/a	-	1657.96	553.662	3	-1.7	2	37.01
VQSKIGSLDNITHVPGGGNK-SEKLDFK-a4-b3	WT_Tau	WT_Tau	intra-protein xl	353	343	10	3023.59	756.906	4	-0.3	14	37.01
VQSKIGSLDNITHVPGGGNK-K4-156	WT_Tau	-	monolink	353	n/a	-	2176.15	726.39	3	-1.4	38	36.88
SEKLDFK-VQIINKK-a3-b6	WT_Tau	WT_Tau	intra-protein xl	343	280	63	1845.06	462.273	4	-1.2	2	36.76
CGSLGNIHHKPGGGQVEVK-SEKLDFK-a10-b3	WT_Tau	WT_Tau	intra-protein xl	331	343	12	2976.51	993.178	3	-0.9	5	36.64
KLDLSNVQSK-LDFKDR-a1-b4	WT_Tau	WT_Tau	intra-protein xl	281	347	66	2061.11	688.045	3	-0.2	3	36.58
IGSLDNITHVPGGGNKK-SEKLDFKDR-a16-b7	WT_Tau	WT_Tau	intra-protein xl	369	347	22	2980.56	746.148	4	-0.5	2	36.41
KIETHKLTFR-K6-155	WT_Tau	-	monolink	375	n/a	-	1426.83	476.617	3	-2.6	2	36.41
KLDLSNVQSKCGSK-HQPGGGKVQIINK-a10-b7	WT_Tau	WT_Tau	intra-protein xl	290	274	16	3075.65	616.137	5	-1.1	1	36.4
IGSTENLKHQPGGGK-K8-155	WT_Tau	-	monolink	267	n/a	-	1676.88	559.969	3	-1.1	10	36.35
KLDLSNVQSKCGSK-K10-K14	WT_Tau	-	intralink	290	294	4	1700.88	567.966	3	-0.7	9	36.2
HVPGGGSVQIVYKPVDLSK-KLDLSNVQSK-a13-b1	WT_Tau	WT_Tau	intra-protein xl	311	281	30	3247.78	650.564	5	-0.6	4	36.1
IGSLDNITHVPGGGNKK-IETHKLTFR-a16-b5	WT_Tau	WT_Tau	intra-protein xl	369	375	6	2987.61	747.911	4	-2.5	2	36.1
LDLSNVQSKCGSKDNIK-K9-156	WT_Tau	-	monolink	290	n/a	-	2061.04	688.021	3	-0.6	1	36.03
VQSKIGSLDNITHVPGGGNK-KIETHK-a4-b1	WT_Tau	WT_Tau	intra-protein xl	353	370	17	2912.57	971.864	3	-1.4	7	36.02
VTSKCGSLGNIHHKPGGGQVEVK-VQIINKK-a4-b6	WT_Tau	WT_Tau	intra-protein xl	321	280	41	3367.84	842.967	4	-1	2	35.88
CGSLGNIHHKPGGGQVEVKSEKLDFK-K19-155	WT_Tau	-	monolink	340	n/a	-	2975.52	992.848	3	-2.9	1	35.86
IGSTENLKHQPGGGK-CGSKDNIK-a8-b4	WT_Tau	WT_Tau	intra-protein xl	267	294	27	2580.29	861.106	3	-1.3	2	35.73
CGSLGNIHHKPGGGQVEVK-KLDLSNVQSKCGSK-a10-b10	WT_Tau	WT_Tau	intra-protein xl	331	290	41	3673.86	919.473	4	-1.7	1	35.32
LDLSNVQSKCGSK-KIETHK-a9-b1	WT_Tau	WT_Tau	intra-protein xl	290	370	80	2327.21	776.745	3	-1.3	1	35.16
VQSKIGSLDNITHVPGGGNKK-K4-155	WT_Tau	-	monolink	353	n/a	-	2303.26	576.822	4	-1.5	10	34.96
HQPGGGKVQIINK-KLDLSNVQSK-a7-b1	WT_Tau	WT_Tau	intra-protein xl	274	281	7	2643.47	529.701	5	-1.3	11	34.92
CGSKDNIK-SEKLDFK-a4-b3	WT_Tau	WT_Tau	intra-protein xl	294	343	49	1923.96	642.327	3	-1.4	1	34.73
CGSKDNIKHVPGGGSVQIVYKPVDLSK-K4-K8	WT_Tau	-	intralink	294	298	4	3019.58	1007.53	3	-0.5	2	34.63
IGSTENLKHQPGGGK-KIETHK-a8-b1	WT_Tau	WT_Tau	intra-protein xl	267	370	103	2414.29	805.771	3	-0.8	2	34.59
DNIKHVPGGGSVQIVYKPVDLSK-KLDLSNVQSK-a4-b1	WT_Tau	WT_Tau	intra-protein xl	298	281	17	3718.03	744.614	5	-0.1	6	34.57
CGSLGNIHHKPGGGQVEVKSEKLDFK-K19-K22	WT_Tau	-	intralink	340	343	3	2958.5	740.633	4	-0.3	3	34.42
CGSKDNIK-VQIINKK-a4-b6	WT_Tau	WT_Tau	intra-protein xl	294	280	14	1900.04	476.019	4	-0.9	1	34.22
IGSTENLKHQPGGGK-KLDLSNVQSKCGSK-a8-b10	WT_Tau	WT_Tau	intra-protein xl	267	290	23	3222.67	1075.23	3	0.3	2	34.2
SEKLDFK-KIETHK-a3-b1	WT_Tau	WT_Tau	intra-protein xl	343	370	27	1757.95	440.497	4	-0.7	4	34.17
HVPGGGSVQIVYKPVDLSK-VQIINKK-a13-b6	WT_Tau	WT_Tau	intra-protein xl	311	280	31	2958.69	592.745	5	-1.1	2	34.14
IGSLDNITHVPGGGNKK-SEKLDFK-a16-b3	WT_Tau	WT_Tau	intra-protein xl	369	343	26	2709.43	542.894	5	-0.2	6	34.11
SEKLDFKDR-K7-155	WT_Tau	-	monolink	347	n/a	-	1291.67	431.566	3	-2.8	1	34.1
KLDLSNVQSK-SKIGSTENLK-a1-b2	WT_Tau	WT_Tau	intra-protein xl	281	259	22	2344.28	587.078	4	-1.1	4	34.1
KLDLSNVQSK-CGSKDNIK-a1-b4	WT_Tau	WT_Tau	intra-protein xl	281	294	13	2189.14	548.292	4	1	3	34.07
IGSTENLKHQPGGGK-KLDLSNVQSK-a8-b1	WT_Tau	WT_Tau	intra-protein xl	267	281	14	2790.49	698.63	4	-0.3	5	34.05
VQSKIGSLDNITHVPGGGNK-KLDLSNVQSK-a4-b1	WT_Tau	WT_Tau	intra-protein xl	353	281	72	3288.76	823.199	4	-1	3	34.04
IGSTENLKHQPGGGK-SEKLDFK-a8-b3	WT_Tau	WT_Tau	intra-protein xl	267	343	76	2525.31	632.335	4	-0.9	3	33.9
LDLSNVQSKCGSK-SEKLDFK-a9-b3	WT_Tau	WT_Tau	intra-protein xl	290	343	53	2438.23	610.566	4	-0.8	1	33.74
VTSKCGSLGNIHHKPGGGQVEVK-K4-K14	WT_Tau	-	intralink	321	331	10	2526.3	843.108	3	0	36	33.67
IGSLDNITHVPGGGNKK-SKIGSTENLK-a16-b2	WT_Tau	WT_Tau	intra-protein xl	369	259	110	2919.56	974.195	3	-1.3	2	33.42
SKIGSTENLK-LDFKDR-a2-b4	WT_Tau	WT_Tau	intra-protein xl	259	347	88	2006.07	669.697	3	-1.1	2	33.34
CGSLGNIHHKPGGGQVEVKSEKLDFK-K19-156	WT_Tau	-	monolink	340	n/a	-	2976.51	745.136	4	-0.4	2	33.01
IGSTENLKHQPGGGK-LDLSNVQSKCGSK-a8-b9	WT_Tau	WT_Tau	intra-protein xl	267	290	23	3094.57	619.922	5	-0.9	1	32.89
VTSKCGSLGNIHHKPGGGQVEVK-SKIGSTENLK-a4-b2	WT_Tau	WT_Tau	intra-protein xl	321	259	62	3601.88	901.478	4	-2	3	32.8
VQSKIGSLDNITHVPGGGNK-SKIGSTENLK-a4-b2	WT_Tau	WT_Tau	intra-protein xl	353	259	94	3233.72	1078.91	3	-1	2	32.72
HVPGGGSVQIVYKPVDLSK-SEKLDFK-a13-b3	WT_Tau	WT_Tau	intra-protein xl	311	343	32	2982.61	746.659	4	-0.5	1	32.7
CGSLGNIHHKPGGGQVEVK-IGSTENLKHQPGGGK-a10-b8	WT_Tau	WT_Tau	intra-protein xl	331	267	64	3632.85	909.219	4	-0.6	1	32.65
LDLSNVQSKCGSKDNIK-K13-155	WT_Tau	-	monolink	294	n/a	-	2060.05	687.693	3	-1.7	1	32.54
DNIKHVPGGGSVQIVYKPVDLSK-HQPGGGKVQIINK-a4-b7	WT_Tau	WT_Tau	intra-protein xl	298	274	24	3962.17	1321.73	3	-1.7	2	32.24
DRVQSKIGSLDNITHVPGGGNK-K6-155	WT_Tau	-	monolink	353	n/a	-	2446.29	612.581	4	-1.1	1	32.07
HVPGGGSVQIVYKPVDLSKVTSK-K13-K23	WT_Tau	-	intralink	311	321	10	2532.39	634.106	4	-0.9	6	32.06
VQSKIGSLDNITHVPGGGNK-SEKLDFKDR-a4-b3	WT_Tau	WT_Tau	intra-protein xl	353	343	10	3294.72	824.688	4	-0.6	9	31.86
IGSLDNITHVPGGGNKK-IGSTENLKHQPGGGK-a16-b8	WT_Tau	WT_Tau	intra-protein xl	369	267	102	3365.76	842.449	4	-1.6	1	31.85
VTSKCGSLGNIHHKPGGGQVEVK-LDFKDR-a4-b4	WT_Tau	WT_Tau	intra-protein xl	321	347	26	3318.71	664.75	5	-0.7	1	31.83
CGSLGNIHHKPGGGQVEVK-SKIGSTENLK-a10-b2	WT_Tau	WT_Tau	intra-protein xl	331	259	72	3186.65	797.669	4	0.2	1	31.83
IGSLDNITHVPGGGNKK-LDFKDR-a16-b4	WT_Tau	WT_Tau	intra-protein xl	369	347	22	2636.39	528.286	5	-0.4	4	31.79
DRVQSKIGSLDNITHVPGGGNK-K6-156	WT_Tau	-	monolink	353	n/a	-	2447.28	612.827	4	-0.4	1	31.74
CGSKDNIKHVPGGGSVQIVYKPVDLSK-K8-156	WT_Tau	-	monolink	298	n/a	-	3037.59	608.525	5	-0.8	5	31.73
VQIINKK-KIETHK-a6-b1	WT_Tau	WT_Tau	intra-protein xl	280	370	90	1734.04	434.517	4	-1.8	1	31.67
VTSKCGSLGNIHHKPGGGQVEVK-K14-156	WT_Tau	-	monolink	331	n/a	-	2544.31	637.086	4	0.6	6	31.36
CGSLGNIHHKPGGGQVEVKSEK-K10-K19	WT_Tau	-	intralink	331	340	9	2455.22	819.416	3	-1	35	30.73
SKIGSTENLK-VQIINKK-a2-b6	WT_Tau	WT_Tau	intra-protein xl	259	280	21	2055.19	686.072	3	-0.4	2	30.68
DNIKHVPGGGSVQIVYKPVDLSK-KLDLSNVQSKCGSK-a4-b10	WT_Tau	WT_Tau	intra-protein xl	298	290	8	4150.2	692.709	6	-1.1	2	30.65
VQSKIGSLDNITHVPGGGNKK-LDFKDR-a4-b4	WT_Tau	WT_Tau	intra-protein xl	353	347	6	3078.65	616.737	5	0	3	30.64
CGSLGNIHHKPGGGQVEVKSEK-K10-156	WT_Tau	-	monolink	331	n/a	-	2473.24	619.317	4	-0.9	2	30.59
HVPGGGSVQIVYKPVDLSKVTSK-K13-K19	WT_Tau	-	intralink	311	317	6	2532.39	845.139	3	-1.1	49	30.53
SKIGSTENLK-SEKLDFK-a2-b3	WT_Tau	WT_Tau	intra-protein xl	259	343	84	2079.11	520.785	4	-0.9	1	30.5
VQSKIGSLDNITHVPGGGNK-K4-K20	WT_Tau	-	intralink	353	369	16	2158.14	720.387	3	-0.8	9	30.43
DNIKHVPGGGSVQIVYKPVDLSK-VQIINKK-a4-b6	WT_Tau	WT_Tau	intra-protein xl	298	280	18	3428.94	572.498	6	-0.3	3	30.24
LDFKDRVQSK-K4-156	WT_Tau	-	monolink	347	n/a	-	1390.74	464.589	3	-1.6	1	30.2
DNIKHVPGGGSVQIVYKPVDLSK-IGSTENLKHQPGGGK-a4-b8	WT_Tau	WT_Tau	intra-protein xl	298	267	31	4109.19	1028.31	4	0.1	3	30.09
VQSKIGSLDNITHVPGGGNK-HTEIKK-a4-b5	WT_Tau	reverse_WT_Tau	intra-protein xl	353	72	281	2912.57	486.436	6	-1.1	1	30.08
VTSKCGSLGNIHHKPGGGQVEVK-VQSKIGSLDNITHVPGGGNK-a4-b4	WT_Tau	WT_Tau	intra-protein xl	321	353	32	4546.38	910.283	5	0.8	1	30.02
CGSLGNIHHKPGGGQVEVKSEKLDFK-K22-155	WT_Tau	-	monolink	343	n/a	-	2975.53	744.89	4	-0.6	1	30
LDLSNVQSKCGSKDNIK-K17-156	WT_Tau	-	monolink	298	n/a	-	2061.04	516.267	4	-1.3	1	29.72
VTSKCGSLGNIHHKPGGGQVEVK-SEKLDFKDR-a4-b3	WT_Tau	WT_Tau	intra-protein xl	321	343	22	3662.88	916.727	4	-2.2	1	29.28
CGSKDNIK-K4-156	WT_Tau	-	monolink	294	n/a	-	1076.52	359.846	3	-1.9	1	29.16
NVKSKIGSTENLK-K3-K5	WT_Tau	-	intralink	257	259	2	1554.86	519.295	3	-1	1	28.99
DNIKHVPGGGSVQIVYKPVDLSK-SEKLDFK-a4-b3	WT_Tau	WT_Tau	intra-protein xl	298	343	45	3452.85	691.578	5	-1.8	1	28.86
CGSLGNIHHKPGGGQVEVK-KIETHK-a10-b1	WT_Tau	WT_Tau	intra-protein xl	331	370	39	2865.49	574.106	5	-1.2	2	28.64
VQSKIGSLDNITHVPGGGNKK-K4-156	WT_Tau	-	monolink	353	n/a	-	2304.24	769.088	3	-0.8	22	28.4
VQSKIGSLDNITHVPGGGNKK-SEKLDFK-a4-b3	WT_Tau	WT_Tau	intra-protein xl	353	343	10	3151.69	1051.57	3	-0.7	1	28.15
IGSTENLKHQPGGGKVQIINK-K15-156	WT_Tau	-	monolink	274	n/a	-	2373.3	594.333	4	-0.6	2	27.9
SEKLDFKDR-KIETHK-a7-b1	WT_Tau	WT_Tau	intra-protein xl	347	370	23	2029.08	677.369	3	-0.7	1	27.77
VTSKCGSLGNIHHKPGGGQVEVK-CGSKDNIK-a4-b4	WT_Tau	WT_Tau	intra-protein xl	321	294	27	3446.73	862.691	4	-2.3	1	27.73
CGSLGNIHHKPGGGQVEVK-VQIINKK-a10-b6	WT_Tau	WT_Tau	intra-protein xl	331	280	51	2952.59	591.527	5	-0.4	3	27.58
VQSKIGSLDNITHVPGGGNK-CGSLGNIHHKPGGGQVEVK-a4-b10	WT_Tau	WT_Tau	intra-protein xl	353	331	22	4131.13	827.233	5	-0.4	3	27.28
KIETHKLTFR-K1-K6	WT_Tau	-	intralink	370	375	5	1409.8	470.942	3	-1.4	3	27.11
HVPGGGSVQIVYKPVDLSK-SKIGSTENLK-a13-b2	WT_Tau	WT_Tau	intra-protein xl	311	259	52	3192.74	799.192	4	-0.2	3	26.86
SEKLDFKDR-K3-156	WT_Tau	-	monolink	343	n/a	-	1292.66	431.894	3	-2.6	5	26.66
VQSKIGSLDNITHVPGGGNK-LDLSNVQSKCGSK-a4-b9	WT_Tau	WT_Tau	intra-protein xl	353	290	63	3592.85	899.22	4	-0.9	2	26.3
KIETHK-LDFKDR-a1-b4	WT_Tau	WT_Tau	intra-protein xl	370	347	23	1684.91	422.236	4	-1.8	1	26.24
VTSKCGSLGNIHHKPGGGQVEVK-KLDLSNVQSKCGSK-a4-b10	WT_Tau	WT_Tau	intra-protein xl	321	290	31	4089.11	1023.28	4	0.2	1	26.08
SEKLDFKDR-K7-156	WT_Tau	-	monolink	347	n/a	-	1292.66	431.894	3	-1.8	4	25.84
DNIKHVPGGGSVQIVYKPVDLSK-K4-K17	WT_Tau	-	intralink	298	311	13	2587.4	647.858	4	-0.2	4	25.81
VTSKCGSLGNIHHKPGGGQVEVKSEK-K4-K23	WT_Tau	-	intralink	321	340	19	2870.47	957.831	3	-0.9	3	25.64
VTSKCGSLGNIHHKPGGGQVEVK-KIETHK-a4-b1	WT_Tau	WT_Tau	intra-protein xl	321	370	49	3280.73	821.19	4	-1.4	1	25.47
IETHKLTFR-K5-156	WT_Tau	-	monolink	375	n/a	-	1299.72	434.247	3	-0.9	1	25.28
HQPGGGKVQIINKK-K7-156	WT_Tau	-	monolink	274	n/a	-	1658.94	553.989	3	-1.2	2	25.25
VQIINKKLDLSNVQSK-K16-156	WT_Tau	-	monolink	290	n/a	-	1982.14	661.722	3	0.6	2	25.09
DGSKPPEGSSPPTKPAPPTK-HVPGGGSVQIVYKPVDLSK-a4-b13	reverse_WT_Tau	WT_Tau	intra-protein xl	252	311	59	4091.14	682.865	6	-4.1	3	25.06
SKIGSTENLKHQPGGGK-K2-156	WT_Tau	-	monolink	259	n/a	-	1893	632.006	3	0	3	25.03
IGSTENLKHQPGGGK-SQVNSLDLKK-a8-b9	WT_Tau	reverse_WT_Tau	intra-protein xl	267	161	106	2790.49	559.105	5	-1.1	2	24.95
HVPGGGSVQIVYKPVDLSKVTSKCGSLGNIHHKPGGGQVEVK-K19-K23	WT_Tau	-	intralink	317	321	4	4487.37	1122.85	4	-0.8	1	24.63
DGSKPPEGSSPPTKPAPPTK-IGSTENLKHQPGGGK-a4-b8	reverse_WT_Tau	WT_Tau	intra-protein xl	252	267	15	3633.85	909.47	4	-4.3	2	24.55
CGSLGNIHHKPGGGQVEVK-HVPGGGSVQIVYKPVDLSK-a10-b13	WT_Tau	WT_Tau	intra-protein xl	331	311	20	4090.14	819.035	5	-1.3	8	24.33
SQVNSLDLKK-INDKSGCK-a9-b4	reverse_WT_Tau	reverse_WT_Tau	intra-protein xl	161	148	13	2189.13	548.291	4	-0.9	1	24.27
SKIGSTENLKHQPGGGK-K2-K10	WT_Tau	-	intralink	259	267	8	1874.98	626.003	3	-0.4	5	24.17
SGCKSQVNSLDLK-KNIIQVK-a4-b1	reverse_WT_Tau	reverse_WT_Tau	intra-protein xl	152	162	10	2414.32	805.783	3	1.8	1	24
HQPGGGKVQIINK-CGSKDNIK-a7-b4	WT_Tau	WT_Tau	intra-protein xl	274	294	20	2433.28	812.1	3	-1.7	3	23.86
GGGPQHKLNETSGIK-K7-K15	reverse_WT_Tau	-	intralink	175	183	8	1659.86	554.293	3	-1	1	23.33
CGSLGNIHHKPGGGQVEVK-IGSLDNITHVPGGGNKK-a10-b16	WT_Tau	WT_Tau	intra-protein xl	331	369	38	3816.97	764.401	5	-0.6	3	23.28
VQIINKKLDLSNVQSK-K7-156	WT_Tau	-	monolink	281	n/a	-	1982.14	661.722	3	0.6	1	23.25
DNIKHVPGGGSVQIVYKPVDLSK-IGSLDNITHVPGGGNKK-a4-b16	WT_Tau	WT_Tau	intra-protein xl	298	369	71	4293.31	859.669	5	-1.6	1	23.07
IGSLDNITHVPGGGNKK-SEKLDFKDR-a16-b3	WT_Tau	WT_Tau	intra-protein xl	369	343	26	2980.56	994.528	3	-0.9	2	22.86
IGSLDNITHVPGGGNKK-HQPGGGKVQIINK-a16-b7	WT_Tau	WT_Tau	intra-protein xl	369	274	95	3218.75	805.696	4	-0.4	3	22.76
VTSKCGSLGNIHHKPGGGQVEVK-KLDLSNVQSK-a4-b1	WT_Tau	WT_Tau	intra-protein xl	321	281	40	3656.93	915.24	4	-0.5	2	22.01
VTSKCGSLGNIHHKPGGGQVEVK-IGSTENLKHQPGGGK-a4-b8	WT_Tau	WT_Tau	intra-protein xl	321	267	54	4048.08	1013.03	4	-2.2	1	22.01
HVPGGGSVQIVYKPVDLSKVTSK-SEKLDFK-a19-b3	WT_Tau	WT_Tau	intra-protein xl	317	343	26	3397.84	680.577	5	-1.3	1	21.89
DNIKHVPGGGSVQIVYKPVDLSK-K4-K23	WT_Tau	-	intralink	298	317	19	2587.4	647.858	4	-0.2	2	21.52
CGSLGNIHHKPGGGQVEVKSEK-VQSKIGSLDNITHVPGGGNK-a19-b4	WT_Tau	WT_Tau	intra-protein xl	340	353	13	4475.3	1119.83	4	0.4	1	21.35
VTSKCGSLGNIHHKPGGGQVEVK-LDLSNVQSKCGSK-a4-b9	WT_Tau	WT_Tau	intra-protein xl	321	290	31	3961.01	991.261	4	-0.6	1	21.27
CGSLGNIHHKPGGGQVEVKSEKLDFK-K10-K19	WT_Tau	-	intralink	331	340	9	2958.5	592.708	5	-0.4	3	21.24
DGSKPPEGSSPPTKPAPPTK-HVPGGGSVQIVYKPVDLSK-a14-b13	reverse_WT_Tau	WT_Tau	intra-protein xl	262	311	49	4091.14	819.237	5	-3.3	3	21.22
HQPGGGKVQIINK-LDFKDR-a7-b4	WT_Tau	WT_Tau	intra-protein xl	274	347	73	2305.26	769.426	3	0.2	1	21.14
VTSKCGSLGNIHHKPGGGQVEVK-HVPGGGSVQIVYKPVDLSK-a4-b13	WT_Tau	WT_Tau	intra-protein xl	321	311	10	4505.38	902.085	5	-0.3	4	20.93
HVPGGGSVQIVYKPVDLSKVTSKCGSLGNIHHKPGGGQVEVK-K33-K42	WT_Tau	-	intralink	331	340	9	4487.37	748.903	6	-1.2	1	20.92
VTSKCGSLGNIHHKPGGGQVEVK-K4-K23	WT_Tau	-	intralink	321	340	19	2526.3	632.583	4	-0.3	4	20.81
NGGGPVHTINDLSGIKSQVR-K16-155	reverse_WT_Tau	-	monolink	89	n/a	-	2203.16	551.798	4	-4.6	4	20.79
GDAGKAKK-AKGADGK-a7-b2	reverse_WT_Tau	WT_Tau	intra-protein xl	301	143	158	1556.85	390.221	4	0.5	1	20.68
HVPGGGSVQIVYKPVDLSKVTSK-K23-155	WT_Tau	-	monolink	321	n/a	-	2549.42	850.815	3	-1.2	3	20.24
VTSKCGSLGNIHHKPGGGQVEVK-SQVNSLDLKK-a4-b9	WT_Tau	reverse_WT_Tau	intra-protein xl	321	161	160	3656.93	732.394	5	-0.3	2	20.09
HVPGGGSVQIVYKPVDLSK-KLDLSNVQSKCGSK-a13-b10	WT_Tau	WT_Tau	intra-protein xl	311	290	21	3679.96	1227.66	3	0	1	19.96
VQSKIGSLDNITHVPGGGNK-HQPGGGKVQIINK-a4-b7	WT_Tau	WT_Tau	intra-protein xl	353	274	79	3532.91	884.235	4	-0.6	2	19.82
HVPGGGSVQIVYKPVDLSK-K19-155	WT_Tau	-	monolink	317	n/a	-	2134.17	712.398	3	-4	2	19.79
TPPKSPSSAK-ENAKAK-a4-b4	WT_Tau	WT_Tau	intra-protein xl	234	383	149	1795.97	450	4	1.4	1	19.76
IGSTENLKHQPGGGKVQIINK-K8-K15	WT_Tau	-	intralink	267	274	7	2355.29	786.104	3	-1.1	2	19.54
DNIKHVPGGGSVQIVYKPVDLSK-SGCKSQVNSLDLKK-a4-b4	WT_Tau	reverse_WT_Tau	intra-protein xl	298	152	146	4150.2	831.048	5	-1.7	1	19
GDAGKAKK-GDAGKAKK-a7-b7	reverse_WT_Tau	reverse_WT_Tau	intra-protein xl	301	301	0	1684.95	422.245	4	1	1	18.89
HQPGGGKVQIINKK-K7-K13	WT_Tau	-	intralink	274	280	6	1640.94	547.987	3	0.1	1	18.79
DNIKHVPGGGSVQIVYKPVDLSK-KIETHK-a4-b1	WT_Tau	WT_Tau	intra-protein xl	298	370	72	3341.83	836.466	4	-0.5	1	18.74
DGSKPPEGSSPPTKPAPPTK-SEKLDFKDR-a14-b7	reverse_WT_Tau	WT_Tau	intra-protein xl	262	347	85	3248.64	813.168	4	-4.4	1	18.67
VQSKIGSLDNITHVPGGGNK-SQVNSLDLKK-a4-b9	WT_Tau	reverse_WT_Tau	intra-protein xl	353	161	192	3288.77	823.199	4	-0.7	3	18.63
CGSLGNIHHKPGGGQVEVK-SEKLDFKDR-a10-b7	WT_Tau	WT_Tau	intra-protein xl	331	347	16	3247.64	650.536	5	-0.7	1	18.58
LDLSNVQSKCGSK-KNIIQVK-a9-b1	WT_Tau	reverse_WT_Tau	intra-protein xl	290	162	128	2414.33	604.589	4	2.4	1	18.57
IGSLDNITHVPGGGNKKIETHK-K16-K22	WT_Tau	-	intralink	369	375	6	2452.3	614.084	4	-1.8	2	18.53
DGSKPPEGSSPPTKPAPPTK-IGSLDNITHVPGGGNKK-a4-b16	reverse_WT_Tau	WT_Tau	intra-protein xl	252	369	117	3817.97	1273.66	3	-4	1	18.23
VQIINKKLDLSNVQSK-K6-156	WT_Tau	-	monolink	280	n/a	-	1982.14	496.543	4	-0.9	1	18.22
IGSLDNITHVPGGGNKKIETHK-K17-156	WT_Tau	-	monolink	370	n/a	-	2470.32	824.446	3	-1.1	3	18.03
HVPGGGSVQIVYKPVDLSK-IGSLDNITHVPGGGNKK-a13-b16	WT_Tau	WT_Tau	intra-protein xl	311	369	58	3823.06	956.773	4	-0.8	1	17.87
SRLQTAPVPMPDLKNVK-INDKSGCK-a14-b4	WT_Tau	reverse_WT_Tau	intra-protein xl	254	148	106	2951.55	591.318	5	-1.9	2	17.83
DGSKPPEGSSPPTKPAPPTK-LDLSNVQSKCGSK-a14-b9	reverse_WT_Tau	WT_Tau	intra-protein xl	262	290	28	3546.77	710.362	5	-4.5	1	17.64
SKIGSTENLKHQPGGGK-K10-156	WT_Tau	-	monolink	267	n/a	-	1892.99	474.256	4	-2.1	2	17.59
DNIKHVPGGGSVQIVYKPVDLSK-CGSLGNIHHKPGGGQVEVK-a4-b10	WT_Tau	WT_Tau	intra-protein xl	298	331	33	4560.39	1141.11	4	0.2	1	17.5
VTSKCGSLGNIHHKPGGGQVEVK-K14-155	WT_Tau	-	monolink	331	n/a	-	2543.32	509.672	5	-2.9	2	17.25
DNIKHVPGGGSVQIVYKPVDLSKVTSK-K4-K23	WT_Tau	-	intralink	298	317	19	3002.64	751.669	4	0.1	2	17.11
DKFDLK-MVSKSK-a2-b4	reverse_WT_Tau	WT_Tau	intra-protein xl	95	130	35	1580.85	527.959	3	3.8	1	17.08
HVPGGGSVQIVYKPVDLSK-IGSTENLKHQPGGGK-a13-b8	WT_Tau	WT_Tau	intra-protein xl	311	267	44	3638.94	910.743	4	-0.9	3	17.06
HVPGGGSVQIVYKPVDLSKVTSKCGSLGNIHHKPGGGQVEVK-K13-156	WT_Tau	-	monolink	311	n/a	-	4505.38	1127.35	4	-0.3	1	16.94
GDAGKAKK-GDAGKAK-a7-b5	reverse_WT_Tau	reverse_WT_Tau	intra-protein xl	301	299	2	1556.85	390.221	4	0.6	1	16.9
VQSKIGSLDNITHVPGGGNK-HVPGGGSVQIVYKPVDLSK-a4-b13	WT_Tau	WT_Tau	intra-protein xl	353	311	42	4137.21	828.45	5	-2.9	1	16.82
DGSKPPEGSSPPTKPAPPTK-HQPGGGKVQIINK-a4-b7	reverse_WT_Tau	WT_Tau	intra-protein xl	252	274	22	3486.83	872.715	4	-4.8	1	16.74
CGSLGNIHHKPGGGQVEVK-HQPGGGKVQIINK-a10-b7	WT_Tau	WT_Tau	intra-protein xl	331	274	57	3485.83	872.466	4	0.2	1	16.62
YVIEAGHDTKAK-MVSKSK-a10-b4	reverse_WT_Tau	WT_Tau	intra-protein xl	57	130	73	2147.13	716.716	3	-2	2	16.49
CGSLGNIHHKPGGGQVEVKSEKLDFK-K10-K22	WT_Tau	-	intralink	331	343	12	2958.5	740.633	4	-0.3	2	16.48
CGSLGNIHHKPGGGQVEVKSEKLDFK-K10-156	WT_Tau	-	monolink	331	n/a	-	2976.51	993.177	3	-1.4	2	16.19
SKIGSTENLKHQPGGGK-K2-K17	WT_Tau	-	intralink	259	274	15	1874.98	626.003	3	-0.4	5	16.06
ASSPSKPPTR-GADGKTK-a6-b5	reverse_WT_Tau	WT_Tau	intra-protein xl	208	148	60	1839.97	614.331	3	-0.3	1	15.98
VQSKIGSLDNITHVPGGGNK-LNETSGIKSK-a4-b8	WT_Tau	reverse_WT_Tau	intra-protein xl	353	183	170	3233.74	647.755	5	3.7	2	15.64
SLDVPKYVIQVSGGGPVHK-K6-156	reverse_WT_Tau	-	monolink	131	n/a	-	2135.17	712.731	3	3	18	15.34
KNIIQVKGGGPQHK-K1-K14	reverse_WT_Tau	-	intralink	162	175	13	1640.94	547.987	3	0.1	3	15.23
IGSTENLKHQPGGGK-K8-K15	WT_Tau	-	intralink	267	274	7	1659.86	554.294	3	-0.1	3	15.22
KLDLSNVQSK-K1-K10	WT_Tau	-	intralink	281	290	9	1268.7	423.906	3	-1.3	4	15.06
ESKVEVQGGGPKHHINGLSGCK-K3-K22	reverse_WT_Tau	-	intralink	102	121	19	2455.22	614.813	4	-2.9	4	14.94
DGSKPPEGSSPPTKPAPPTK-VQIINKK-a4-b6	reverse_WT_Tau	WT_Tau	intra-protein xl	252	280	28	2953.6	591.727	5	-4.9	3	14.9
SPSSAKSRLQTAPVPMPDLK-ESKVEVQGGGPK-a6-b3	WT_Tau	reverse_WT_Tau	intra-protein xl	240	102	138	3460.81	866.211	4	-3	1	14.88
HVPGGGSVQIVYKPVDLSK-KLDLSNVQSKCGSK-a13-b1	WT_Tau	WT_Tau	intra-protein xl	311	281	30	3679.95	920.997	4	-1.6	1	14.83
HVPGGGSVQIVYKPVDLSK-HQPGGGKVQIINK-a13-b7	WT_Tau	WT_Tau	intra-protein xl	311	274	37	3491.92	873.989	4	-0.5	1	14.56
LNETSGIKSKVNK-SKSVXR-a8-b2	reverse_WT_Tau	reverse_WT_Tau	intra-protein xl	183	312	129	2277.23	456.454	5	-2.8	1	14.47
KNGGGPVHTINDLSGIK-K1-K17	reverse_WT_Tau	-	intralink	73	89	16	1843.98	615.667	3	-0.1	1	14.42
SKIGSTENLK-SQVNSLDLKK-a2-b9	WT_Tau	reverse_WT_Tau	intra-protein xl	259	161	98	2344.28	587.079	4	-0.9	1	14.38
HVPGGGSVQIVYKPVDLSKVTSK-KLDLSNVQSK-a19-b1	WT_Tau	WT_Tau	intra-protein xl	317	281	36	3663.02	916.763	4	-1	4	14.28
LDLSNVQSKCGSK-STVKSLDVPK-a9-b4	WT_Tau	reverse_WT_Tau	intra-protein xl	290	125	165	2645.4	882.809	3	3	1	14.03
HVPGGGSVQIVYKPVDLSKVTSK-CGSLGNIHHKPGGGQVEVK-a19-b10	WT_Tau	WT_Tau	intra-protein xl	317	331	14	4505.38	1127.35	4	-1.3	3	14.03
KLDLSNVQSKCGSK-NVKSKIGSTENLK-a10-b5	WT_Tau	WT_Tau	intra-protein xl	290	259	31	3117.66	780.424	4	-2.4	5	13.94
GGGPQHKLNETSGIK-NVKSKIGSTENLK-a7-b5	reverse_WT_Tau	WT_Tau	intra-protein xl	175	259	84	3076.66	1026.56	3	4.1	1	13.85
KLDLSNVQSKCGSK-NVKSKIGSTENLK-a1-b5	WT_Tau	WT_Tau	intra-protein xl	281	259	22	3117.66	520.618	6	-2.8	4	13.63
KAKGADGK-AKGADGK-a3-b2	WT_Tau	WT_Tau	intra-protein xl	143	143	0	1556.85	519.959	3	0.9	3	13.5
VEVQGGGPKHHINGLSGCKSTVK-K19-156	reverse_WT_Tau	-	monolink	121	n/a	-	2544.31	637.085	4	-0.6	2	13.5
KLDLSNVQSKCGSK-K14-156	WT_Tau	-	monolink	294	n/a	-	1718.88	573.97	3	-1.2	3	13.42
CGSLGNIHHKPGGGQVEVKSEK-K22-155	WT_Tau	-	monolink	343	n/a	-	2472.25	825.09	3	-3.3	1	13.35
CGSLGNIHHKPGGGQVEVK-QGPPAAGRPTAIKTK-a10-b13	WT_Tau	reverse_WT_Tau	intra-protein xl	331	292	39	3602.89	1201.97	3	-4.4	1	13.34
CGSKDNIKHVPGGGSVQIVYKPVDLSK-K4-156	WT_Tau	-	monolink	294	n/a	-	3037.59	608.525	5	-1.3	7	13.32
AKANERFTLK-AKGADGKTK-a2-b7	reverse_WT_Tau	WT_Tau	intra-protein xl	59	148	89	2189.21	730.745	3	-1.8	1	13.28
KLDLSNVQSKCGSK-NVKSKIGSTENLK-a10-b3	WT_Tau	WT_Tau	intra-protein xl	290	257	33	3117.66	780.424	4	-2.4	3	13.27
KLDLSNVQSKCGSK-LNETSGIKSKVNK-a10-b8	WT_Tau	reverse_WT_Tau	intra-protein xl	290	183	107	3117.66	780.423	4	-2.5	3	13.13
TANAQGKQGPPAAGRPTAIK-FDLKESK-a7-b4	reverse_WT_Tau	reverse_WT_Tau	intra-protein xl	279	99	180	2936.57	735.151	4	-0.2	1	13.07
SKVNKLDPMPVPATQLR-INDKSGCK-a2-b4	reverse_WT_Tau	reverse_WT_Tau	intra-protein xl	185	148	37	2951.55	591.318	5	-1.5	2	13.03
AKKDDSGTGDK-IPAKTPPAPK-a3-b4	reverse_WT_Tau	WT_Tau	intra-protein xl	302	174	128	2277.23	570.316	4	4.6	1	13.03
VQSKIGSLDNITHVPGGGNKK-LTFRENAKAK-a20-b8	WT_Tau	WT_Tau	intra-protein xl	369	383	14	3462.89	866.731	4	-0.7	2	13
DKFDLKESK-KNIIQVK-a6-b1	reverse_WT_Tau	reverse_WT_Tau	intra-protein xl	99	162	63	2088.18	697.069	3	0.8	1	12.91
IGSLDNITHVPGGGNKK-NIIQVKGGGPQHK-a16-b6	WT_Tau	reverse_WT_Tau	intra-protein xl	369	168	201	3218.76	1073.93	3	1.6	1	12.86
SKASSPSKPPTR-KIETHK-a2-b1	reverse_WT_Tau	WT_Tau	intra-protein xl	202	370	168	2134.18	712.401	3	1.6	18	12.81
KLDLSNVQSK-FDLKESK-a1-b4	WT_Tau	reverse_WT_Tau	intra-protein xl	281	99	182	2134.15	712.391	3	-1.4	8	12.77
ESKVEVQGGGPKHHINGLSGCK-K3-K12	reverse_WT_Tau	-	intralink	102	111	9	2455.22	614.813	4	-2.9	3	12.73
GAAPPGQKGQANATR-LNETSGIKSK-a8-b8	WT_Tau	reverse_WT_Tau	intra-protein xl	163	183	20	2636.39	528.286	5	1.2	1	12.7
CGSLGNIHHKPGGGQVEVK-K10-K19	WT_Tau	-	intralink	331	340	9	2111.06	528.772	4	-1.2	15	12.59
KLDLSNVQSKCGSK-K1-K14	WT_Tau	-	intralink	281	294	13	1700.87	567.966	3	-1.3	3	12.53
HVPGGGSVQIVYKPVDLSK-CGSKDNIK-a13-b4	WT_Tau	WT_Tau	intra-protein xl	311	294	17	3037.59	608.525	5	-0.8	1	12.48
HVPGGGSVQIVYKPVDLSKVTSK-DGSKPPEGSSPPTKPAPPTK-a13-b14	WT_Tau	reverse_WT_Tau	intra-protein xl	311	262	49	4506.39	902.285	5	-3.4	3	12.24
HVPGGGSVQIVYKPVDLSK-GGGPQHKLNETSGIK-a13-b7	WT_Tau	reverse_WT_Tau	intra-protein xl	311	175	136	3638.94	910.743	4	-0.9	1	12.14
HVPGGGSVQIVYKPVDLSKVTSK-SKIGSTENLK-a19-b2	WT_Tau	WT_Tau	intra-protein xl	317	259	58	3607.98	903.003	4	-1	1	11.9
SKIGSTENLKHQPGGGK-SKASSPSKPPTR-a2-b2	WT_Tau	reverse_WT_Tau	intra-protein xl	259	202	57	3116.66	520.451	6	1.3	7	11.59
IGSLDNITHVPGGGNKKIETHK-LQTAPVPMPDLKNVKSK-a17-b12	WT_Tau	WT_Tau	intra-protein xl	370	254	116	4317.37	1080.35	4	4.8	1	11.58
SQVNSLDLKK-FDLKESK-a9-b4	reverse_WT_Tau	reverse_WT_Tau	intra-protein xl	161	99	62	2134.15	712.391	3	-1.4	2	11.32
LGADTDGEQDQHXTYGGQDKRDGLGYTGAHDEMVEFEQRPEAM-VNKLDPMPVPATQLR-a20-b3	reverse_WT_Tau	reverse_WT_Tau	intra-protein xl	418	188	230	6616.04	1103.68	6	1.6	2	11.21
GAAPPGQKGQANATR-STVKSLDVPK-a8-b4	WT_Tau	reverse_WT_Tau	intra-protein xl	163	125	38	2633.41	878.81	3	-2.2	4	11.1
YVIEAGHDTKAK-AKANERFTLK-a10-b2	reverse_WT_Tau	reverse_WT_Tau	intra-protein xl	57	59	2	2645.42	882.815	3	1.6	1	11.09
ESKVEVQGGGPKHHINGLSGCK-K12-K22	reverse_WT_Tau	-	intralink	111	121	10	2455.23	614.815	4	-0.4	2	10.57
SKASSPSKPPTR-AKKDDSGTGDK-a2-b3	reverse_WT_Tau	reverse_WT_Tau	intra-protein xl	202	302	100	2500.28	834.436	3	2.7	4	10.57
YVIQVSGGGPVHKINDKSGCK-GDAGKAKK-a17-b5	reverse_WT_Tau	reverse_WT_Tau	intra-protein xl	148	299	151	3153.67	631.742	5	3.9	1	10.51
VEVQGGGPKHHINGLSGCK-K9-K19	reverse_WT_Tau	-	intralink	111	121	10	2111.05	528.771	4	-2.3	21	10.42
YVIQVSGGGPVHKINDK-KIETHKLTFR-a13-b6	reverse_WT_Tau	WT_Tau	intra-protein xl	144	375	231	3219.79	1074.27	3	3	5	10.4
GGGPQHKLNETSGIKSK-SKASSPSKPPTR-a15-b2	reverse_WT_Tau	reverse_WT_Tau	intra-protein xl	183	202	19	3116.66	624.34	5	0.9	3	10.38
VTSKCGSLGNIHHKPGGGQVEVKSEK-K23-156	WT_Tau	-	monolink	340	n/a	-	2888.48	723.128	4	-0.5	1	10.33
SKIGSTENLKHQPGGGK-LNETSGIKSK-a2-b8	WT_Tau	reverse_WT_Tau	intra-protein xl	259	183	76	2950.59	591.125	5	4.8	3	10.23
TPPKSPSSAKSR-KIETHK-a4-b1	WT_Tau	WT_Tau	intra-protein xl	234	370	136	2134.18	712.401	3	1.7	11	10.23
LQTAPVPMPDLKNVK-SPSSAKSR-a12-b6	WT_Tau	WT_Tau	intra-protein xl	254	240	14	2606.42	652.612	4	2.1	1	10.19
QGPPAAGRPTAIKTK-TPPKSPSSAKSR-a13-b4	reverse_WT_Tau	WT_Tau	intra-protein xl	292	234	58	2871.59	718.904	4	-2.6	1	10.16
SLDVPKYVIQVSGGGPVHK-K6-155	reverse_WT_Tau	-	monolink	131	n/a	-	2134.18	712.4	3	-1.4	17	9.99
DGSKPPEGSSPPTKPAPPTK-IATPRGAAPPGQKGQANATR-a14-b13	reverse_WT_Tau	WT_Tau	intra-protein xl	262	163	99	4073.11	815.631	5	-3.5	2	9.89
KLDLSNVQSKCGSK-LNETSGIKSKVNK-a1-b10	WT_Tau	reverse_WT_Tau	intra-protein xl	281	185	96	3117.66	1040.23	3	-2.7	2	9.88
SKASSPSKPPTRVVAVK-AKANERFTLK-a2-b2	reverse_WT_Tau	reverse_WT_Tau	intra-protein xl	202	59	143	3052.74	1018.59	3	-0.6	1	9.84
KIETHKLTFR-SQVRDKFDLK-a1-b6	WT_Tau	reverse_WT_Tau	intra-protein xl	370	95	275	2644.47	529.902	5	0.1	1	9.78
KLDLSNVQSKCGSK-NVKSKIGSTENLK-a1-b3	WT_Tau	WT_Tau	intra-protein xl	281	257	24	3117.66	1040.23	3	-2.3	7	9.72
HVPGGGSVQIVYKPVDLSKVTSK-CGSLGNIHHKPGGGQVEVK-a13-b10	WT_Tau	WT_Tau	intra-protein xl	311	331	20	4505.38	1127.35	4	-1.3	1	9.71
HVPGGGSVQIVYKPVDLSK-K19-156	WT_Tau	-	monolink	317	n/a	-	2135.17	712.732	3	4.1	7	9.68
GAAPPGQKGQANATRIPAK-SKIGSTENLK-a8-b2	WT_Tau	WT_Tau	intra-protein xl	163	259	96	3045.66	1016.23	3	2	2	9.67
SKASSPSKPPTR-KLDLSNVQSK-a2-b1	reverse_WT_Tau	WT_Tau	intra-protein xl	202	281	79	2510.36	628.597	4	-4.8	1	9.53
CGSKDNIKHVPGGGSVQIVYKPVDLSK-KLDLSNVQSK-a21-b1	WT_Tau	WT_Tau	intra-protein xl	311	281	30	4150.22	1038.56	4	1.5	1	9.51
DGSKPPEGSSPPTKPAPPTK-K4-155	reverse_WT_Tau	-	monolink	252	n/a	-	2129.1	533.283	4	-0.3	1	9.46
VEVQGGGPKHHINGLSGCKSTVK-HVPGGGSVQIVYKPVDLSK-a9-b13	reverse_WT_Tau	WT_Tau	intra-protein xl	111	311	200	4505.38	902.084	5	-0.6	1	9.45
LDPMPVPATQLRSKASSPSKPPTR-SQVNSLDLKK-a20-b9	reverse_WT_Tau	reverse_WT_Tau	intra-protein xl	208	161	47	3829.09	958.28	4	2.5	1	9.39
SQVRDKFDLK-SEKLDFKDR-a6-b3	reverse_WT_Tau	WT_Tau	intra-protein xl	95	343	248	2509.33	628.34	4	4.1	1	9.36
LQTAPVPMPDLKNVK-YVIEAGHDTKAK-a12-b10	WT_Tau	reverse_WT_Tau	intra-protein xl	254	57	197	3118.66	1040.56	3	-4	5	9.3
GGGPQHKLNETSGIKSK-LNETSGIKSK-a15-b8	reverse_WT_Tau	reverse_WT_Tau	intra-protein xl	183	183	0	2950.59	738.654	4	4.6	3	9.29
TPPKSPSSAKSR-AKKDDSGTGDK-a4-b3	WT_Tau	reverse_WT_Tau	intra-protein xl	234	302	68	2500.28	834.436	3	2.7	1	9.29
VTSKCGSLGNIHHKPGGGQVEVKSEK-K4-K26	WT_Tau	-	intralink	321	343	22	2870.48	957.834	3	2.7	1	9.24
INDKSGCK-TKIATPR-a4-b2	reverse_WT_Tau	WT_Tau	intra-protein xl	148	150	2	1843.98	615.666	3	-3.6	1	9.22
YVIQVSGGGPVHKINDK-KIETHKLTFR-a13-b1	reverse_WT_Tau	WT_Tau	intra-protein xl	144	370	226	3219.76	1074.26	3	-5	15	9.22
KLDLSNVQSKCGSK-LNETSGIKSKVNK-a10-b10	WT_Tau	reverse_WT_Tau	intra-protein xl	290	185	105	3117.66	1040.23	3	-2.7	7	9.22
VQSKIGSLDNITHVPGGGNK-SEKLDFKDR-a4-b7	WT_Tau	WT_Tau	intra-protein xl	353	347	6	3294.72	824.688	4	-0.2	1	9.21
TPPAPKTPPSSGEPPKSGDR-KVAVVRTPPK-a6-b1	WT_Tau	WT_Tau	intra-protein xl	180	225	45	3233.77	809.45	4	-2.2	1	9.14
TPPKSPSSAKSR-HTEIKK-a10-b5	WT_Tau	reverse_WT_Tau	intra-protein xl	240	72	168	2134.17	712.399	3	-0.4	1	9.1
NGGGPVHTINDLSGIKSQVRDK-LQTAPVPMPDLKNVKSK-a16-b15	reverse_WT_Tau	WT_Tau	intra-protein xl	89	257	168	4294.31	859.87	5	0.4	1	9.08
KPERTPPTPLSPTRSR-SKDGTGSDDKK-a1-b10	reverse_WT_Tau	WT_Tau	intra-protein xl	218	140	78	3093.61	1032.21	3	2.9	2	9.06
KLDLSNVQSKCGSK-VVAVKKPER-a10-b5	WT_Tau	reverse_WT_Tau	intra-protein xl	290	217	73	2725.51	909.51	3	-2.9	2	8.98
HVPGGGSVQIVYKPVDLSKVTSK-CGSKDNIK-a19-b4	WT_Tau	WT_Tau	intra-protein xl	317	294	23	3452.82	864.213	4	-3.4	1	8.8
NGGGPVHTINDLSGIKSQVR-ESKVEVQGGGPK-a16-b3	reverse_WT_Tau	reverse_WT_Tau	intra-protein xl	89	102	13	3399.78	850.954	4	3.1	1	8.77
SKASSPSKPPTR-HTEIKK-a8-b5	reverse_WT_Tau	reverse_WT_Tau	intra-protein xl	208	72	136	2134.17	712.399	3	-0.4	3	8.71
DNIKHVPGGGSVQIVYKPVDLSKVTSK-DGSKPPEGSSPPTKPAPPTK-a23-b14	WT_Tau	reverse_WT_Tau	intra-protein xl	317	262	55	4976.63	996.334	5	-3.5	1	8.69
CGSKDNIKHVPGGGSVQIVYKPVDLSK-AKANERFTLK-a21-b2	WT_Tau	reverse_WT_Tau	intra-protein xl	311	59	252	4196.24	1050.07	4	0.5	1	8.67
HHINGLSGCKSTVK-K14-156	reverse_WT_Tau	-	monolink	125	n/a	-	1692.86	424.222	4	-1.9	1	8.66
SKIGSTENLKHQPGGGK-TPPKSPSSAKSR-a2-b10	WT_Tau	WT_Tau	intra-protein xl	259	240	19	3116.66	780.172	4	-0.4	2	8.66
SKASSPSKPPTR-HTEIKK-a2-b5	reverse_WT_Tau	reverse_WT_Tau	intra-protein xl	202	72	130	2134.18	712.401	3	1.6	4	8.61
ESKVEVQGGGPKHHINGLSGCK-SKASSPSKPPTRVVAVK-a3-b8	reverse_WT_Tau	reverse_WT_Tau	intra-protein xl	102	208	106	4193.23	1049.32	4	-1.1	2	8.61
APIRTANAQGKQGPPAAGRPTAIK-LQTAPVPXPDLKNVKSK-a11-b12	reverse_WT_Tau	WT_Tau	intra-protein xl	279	254	25	4389.44	878.895	5	0.7	2	8.58
GADGKTKIATPR-XVSKSK-a7-b4	WT_Tau	WT_Tau	intra-protein xl	150	130	20	2046.12	683.049	3	4.8	1	8.48
LGADTDGEQDQHMTYGGQDKRDGLGYTGAHDEMVEFEQRPEAM-VNKLDPXPVPATQLR-a20-b3	reverse_WT_Tau	reverse_WT_Tau	intra-protein xl	418	188	230	6616.04	1103.68	6	1.6	3	8.4
LNETSGIKSK-SQVNSLDLKK-a8-b9	reverse_WT_Tau	reverse_WT_Tau	intra-protein xl	183	161	22	2344.28	587.079	4	-0.2	1	8.36
SGCKSQVNSLDLKK-LNETSGIKSKVNK-a4-b10	reverse_WT_Tau	reverse_WT_Tau	intra-protein xl	152	185	33	3117.66	1040.23	3	-2.3	1	8.34
IGSLDNITHVPGGGNKK-LTFRENAKAK-a16-b8	WT_Tau	WT_Tau	intra-protein xl	369	383	14	3020.65	756.171	4	3.6	2	8.32
AKTDHGAEIVYK-TKGDAGKAK-a2-b2	WT_Tau	reverse_WT_Tau	intra-protein xl	385	294	91	2343.25	782.092	3	3.9	1	8.31
KPERTPPTPLSPTRSR-KLDLSNVQSK-a1-b1	reverse_WT_Tau	WT_Tau	intra-protein xl	218	281	63	3087.7	1030.24	3	-0.4	2	8.28
FDLKESKVEVQGGGPK-K4-K7	reverse_WT_Tau	-	intralink	99	102	3	1854.97	619.331	3	-1.2	1	8.17
IATPRGAAPPGQKGQANATR-ESKVEVQGGGPK-a13-b3	WT_Tau	reverse_WT_Tau	intra-protein xl	163	102	61	3312.76	829.198	4	2.6	1	8.14
TPPKSPSSAKSR-HTEIKK-a4-b5	WT_Tau	reverse_WT_Tau	intra-protein xl	234	72	162	2134.17	712.399	3	-0.4	4	8.08
SKIGSTENLKHQPGGGK-SQVRDKFDLK-a10-b6	WT_Tau	reverse_WT_Tau	intra-protein xl	267	95	172	3109.66	778.423	4	2.3	1	8.07
SKASSPSKPPTR-KIETHK-a8-b1	reverse_WT_Tau	WT_Tau	intra-protein xl	208	370	162	2134.18	712.401	3	2.3	1	8.01
LGADTDGEQDQHXTYGGQDKRDGLGYTGAHDEMVEFEQRPEAX-VNKLDPMPVPATQLR-a20-b3	reverse_WT_Tau	reverse_WT_Tau	intra-protein xl	418	188	230	6632.06	1106.35	6	4.4	1	7.92
SGCKSQVNSLDLKK-K13-156	reverse_WT_Tau	-	monolink	161	n/a	-	1718.88	573.97	3	-1.2	2	7.88
VVAVKKPERTPPTPLSPTR-KLDLSNVQSKCGSK-a6-b1	reverse_WT_Tau	WT_Tau	intra-protein xl	218	281	63	3773.07	1258.7	3	-3.8	1	7.86
GAAPPGQKGQANATRIPAK-LQTAPVPMPDLKNVKSK-a8-b15	WT_Tau	WT_Tau	intra-protein xl	163	257	94	3835.1	1279.37	3	-4.5	2	7.84
LDLSNVQSKCGSK-IPAKTPPAPK-a9-b4	WT_Tau	WT_Tau	intra-protein xl	290	174	116	2591.39	648.856	4	-3.3	1	7.79
GADGKTKIATPR-DKFDLKESK-a5-b2	WT_Tau	reverse_WT_Tau	intra-protein xl	148	95	53	2460.33	821.119	3	4.4	1	7.78
TANAQGKQGPPAAGRPTAIK-TPPAPKTPPSSGEPPK-a7-b6	reverse_WT_Tau	WT_Tau	intra-protein xl	279	180	99	3657.94	732.595	5	-3.1	2	7.73
GGGPQHKLNETSGIK-KLDLSNVQSK-a7-b1	reverse_WT_Tau	WT_Tau	intra-protein xl	175	281	106	2790.48	931.169	3	-1.2	1	7.68
SGCKSQVNSLDLK-IPAKTPPAPK-a4-b4	reverse_WT_Tau	WT_Tau	intra-protein xl	152	174	22	2591.39	864.804	3	-4	1	7.5
KLDLSNVQSK-INDKSGCK-a1-b4	WT_Tau	reverse_WT_Tau	intra-protein xl	281	148	133	2189.13	548.291	4	-0.9	2	7.44
KAKGADGK-AKGADGK-a1-b2	WT_Tau	WT_Tau	intra-protein xl	141	143	2	1556.85	519.959	3	0.9	1	7.44
IPAKTPPAPKTPPSSGEPPK-K10-K20	WT_Tau	-	intralink	180	190	10	2134.18	712.4	3	4.9	19	7.41
KLDLSNVQSKCGSK-AKGADGKTK-a1-b7	WT_Tau	WT_Tau	intra-protein xl	281	148	133	2575.37	644.85	4	1.5	1	7.39
HTEIKKNGGGPVHTINDLSGIK-K5-K22	reverse_WT_Tau	-	intralink	72	89	17	2452.32	614.087	4	4.4	1	7.23
VEVQGGGPKHHINGLSGCK-K9-156	reverse_WT_Tau	-	monolink	111	n/a	-	2129.07	533.275	4	-0.6	1	7.23
NIIQVKGGGPQHKLNETSGIK-K6-K21	reverse_WT_Tau	-	intralink	168	183	15	2355.29	786.105	3	0.7	1	7.21
GAAPPGQKGQANATRIPAK-KAKGADGK-a8-b3	WT_Tau	WT_Tau	intra-protein xl	163	143	20	2743.52	915.514	3	3.1	1	7.2
KNGGGPVHTINDLSGIKSQVR-K17-155	reverse_WT_Tau	-	monolink	89	n/a	-	2331.26	583.822	4	-5	1	7.18
HVPGGGSVQIVYKPVDLSKVTSK-DGSKPPEGSSPPTKPAPPTK-a19-b4	WT_Tau	reverse_WT_Tau	intra-protein xl	317	252	65	4506.38	752.072	6	-4.2	1	7.1
AKTDHGAEIVYKSPVVSGDTSPR-IPAKTPPAPKTPPSSGEPPK-a12-b4	WT_Tau	WT_Tau	intra-protein xl	395	174	221	4547.37	910.482	5	-4.6	2	7.05
AKKDDSGTGDK-SKDGTGSDDKK-a3-b10	reverse_WT_Tau	WT_Tau	intra-protein xl	302	140	162	2395.13	799.385	3	-1.2	1	6.99
SKIGSTENLKHQPGGGK-SKASSPSKPPTR-a2-b8	WT_Tau	reverse_WT_Tau	intra-protein xl	259	208	51	3116.66	1039.89	3	0.7	3	6.99
TPPKSPSSAKSR-KIETHK-a10-b1	WT_Tau	WT_Tau	intra-protein xl	240	370	130	2134.18	712.4	3	1.4	2	6.89
DGTGSDDKKAK-SKDGTGSDDKK-a9-b2	WT_Tau	WT_Tau	intra-protein xl	141	132	9	2395.13	799.385	3	-1.2	1	6.89
INDKSGCKSQVNSLDLK-LNETSGIKSKVNK-a4-b10	reverse_WT_Tau	reverse_WT_Tau	intra-protein xl	148	185	37	3459.81	865.961	4	-2.9	2	6.87
GGGPQHKLNETSGIKSK-TPPKSPSSAKSR-a15-b4	reverse_WT_Tau	WT_Tau	intra-protein xl	183	234	51	3116.66	780.171	4	-1.1	1	6.79
LQTAPVPXPDLKNVKSK-ASSPSKPPTR-a12-b6	WT_Tau	reverse_WT_Tau	intra-protein xl	254	208	46	3045.66	1016.23	3	3.3	1	6.78
YVIQVSGGGPVHKINDK-DDSGTGDKSKSVMR-a13-b10	reverse_WT_Tau	reverse_WT_Tau	intra-protein xl	144	312	168	3429.71	858.435	4	-2.7	1	6.68
STVKSLDVPK-KIETHK-a4-b1	reverse_WT_Tau	WT_Tau	intra-protein xl	125	370	245	1965.12	656.046	3	0	2	6.61
GGGPQHKLNETSGIK-FDLKESK-a7-b4	reverse_WT_Tau	reverse_WT_Tau	intra-protein xl	175	99	76	2525.32	632.337	4	1.5	1	6.57
SLDVPKYVIQVSGGGPVHKINDK-LNETSGIKSK-a6-b8	reverse_WT_Tau	reverse_WT_Tau	intra-protein xl	131	183	52	3662.99	733.605	5	-0.5	1	6.54
TPPKSPSSAKSR-DGTGSDDKKAK-a4-b9	WT_Tau	WT_Tau	intra-protein xl	234	141	93	2500.28	834.436	3	2.7	1	6.54
STVKSLDVPKYVIQVSGGGPVHK-K10-K23	reverse_WT_Tau	-	intralink	131	144	13	2532.4	845.14	3	0.3	1	6.52
FDLKESKVEVQGGGPK-IPAKTPPAPK-a7-b4	reverse_WT_Tau	WT_Tau	intra-protein xl	102	174	72	2873.6	719.409	4	4.8	1	6.51
HTEIKKNGGGPVHTINDLSGIK-K22-156	reverse_WT_Tau	-	monolink	89	n/a	-	2470.32	495.071	5	-1	1	6.49
LQTAPVPXPDLKNVK-NVKSKIGSTENLK-a12-b5	WT_Tau	WT_Tau	intra-protein xl	254	259	5	3220.77	1074.6	3	-2.5	1	6.48
DRVQSKIGSLDNITHVPGGGNK-SQVNSLDLKK-a6-b9	WT_Tau	reverse_WT_Tau	intra-protein xl	353	161	192	3559.91	712.989	5	3.3	2	6.39
HQPGGGKVQIINK-SQVNSLDLKK-a7-b9	WT_Tau	reverse_WT_Tau	intra-protein xl	274	161	113	2643.47	882.163	3	-1.5	1	6.39
STVKSLDVPKYVIQVSGGGPVHK-ASSPSKPPTR-a4-b6	reverse_WT_Tau	reverse_WT_Tau	intra-protein xl	125	208	83	3558.92	712.793	5	-4.8	1	6.36
YVIEAGHDTKAK-AKGADGKTK-a10-b7	reverse_WT_Tau	WT_Tau	intra-protein xl	57	148	91	2343.25	782.092	3	3.9	1	6.36
VTSKCGSLGNIHHKPGGGQVEVKSEK-K4-156	WT_Tau	-	monolink	321	n/a	-	2888.48	578.703	5	-1.4	1	6.3
VQSKIGSLDNITHVPGGGNKK-TPSLPTPPTREPKK-a20-b13	WT_Tau	WT_Tau	intra-protein xl	369	224	145	3834.11	1279.04	3	2	2	6.23
GGGPQHKLNETSGIKSK-DDSGTGDKSKSVMR-a15-b8	reverse_WT_Tau	reverse_WT_Tau	intra-protein xl	183	310	127	3356.66	672.339	5	-2.1	1	6.2
SKVNKLDPXPVPATQLR-KPERTPPTPLSPTRSR-a2-b1	reverse_WT_Tau	reverse_WT_Tau	intra-protein xl	185	218	33	3866.13	967.54	4	2.3	1	6.2
GADGKTKIATPR-LTFRENAKAK-a5-b8	WT_Tau	WT_Tau	intra-protein xl	148	383	235	2528.41	843.812	3	2.1	1	6.16
SKIGSTENLKHQPGGGK-TPPKSPSSAKSR-a2-b4	WT_Tau	WT_Tau	intra-protein xl	259	234	25	3116.66	1039.89	3	0.7	1	6.1
KNGGGPVHTINDLSGIK-K1-155	reverse_WT_Tau	-	monolink	73	n/a	-	1861.01	621.343	3	-1.5	1	5.91
VQSKIGSLDNITHVPGGGNKK-K21-156	WT_Tau	-	monolink	370	n/a	-	2304.24	461.856	5	-0.8	1	5.85
KLDLSNVQSKCGSK-LNETSGIKSKVNK-a1-b8	WT_Tau	reverse_WT_Tau	intra-protein xl	281	183	98	3117.66	1040.23	3	-2.3	1	5.81
KNGGGPVHTINDLSGIK-HQPGGGKVQIINK-a1-b7	reverse_WT_Tau	WT_Tau	intra-protein xl	73	274	201	3218.76	1073.93	3	2.4	1	5.77
IPAKTPPAPKTPPSSGEPPK-GADGKTKIATPR-a10-b5	WT_Tau	WT_Tau	intra-protein xl	180	148	32	3347.85	837.971	4	1.9	1	5.74
DGSKPPEGSSPPTKPAPPTK-KPERTPPTPLSPTRSR-a4-b1	reverse_WT_Tau	reverse_WT_Tau	intra-protein xl	252	218	34	3931.06	983.774	4	-4.4	1	5.72
LQTAPVPXPDLKNVK-TPPKSPSSAKSR-a12-b10	WT_Tau	WT_Tau	intra-protein xl	254	240	14	3045.66	1016.23	3	3.3	1	5.7
STVKSLDVPKYVIQVSGGGPVHK-K4-K23	reverse_WT_Tau	-	intralink	125	144	19	2532.4	845.14	3	0.3	1	5.53
DRVQSKIGSLDNITHVPGGGNK-NVKSKIGSTENLK-a6-b5	WT_Tau	WT_Tau	intra-protein xl	353	259	94	3846.08	962.527	4	4.1	2	5.53
YVIQVSGGGPVHKINDK-STVKSLDVPK-a13-b4	reverse_WT_Tau	reverse_WT_Tau	intra-protein xl	144	125	19	3020.65	756.171	4	-1	1	5.52
LGADTDGEQDQHMTYGGQDKRDGLGYTGAHDEXVEFEQRPEAM-VNKLDPMPVPATQLR-a20-b3	reverse_WT_Tau	reverse_WT_Tau	intra-protein xl	418	188	230	6616.06	1324.22	5	4.4	1	5.5
SGCKSQVNSLDLK-SKDGTGSDDK-a4-b2	reverse_WT_Tau	WT_Tau	intra-protein xl	152	132	20	2581.21	861.412	3	-2.5	2	5.45
LQTAPVPXPDLKNVK-SKASSPSKPPTR-a12-b8	WT_Tau	reverse_WT_Tau	intra-protein xl	254	208	46	3045.66	1016.23	3	0.6	1	5.42
LQTAPVPXPDLKNVKSK-SGCKSQVNSLDLK-a15-b4	WT_Tau	reverse_WT_Tau	intra-protein xl	257	152	105	3453.81	1152.28	3	-4.5	2	5.38
SLDVPKYVIQVSGGGPVHK-K19-156	reverse_WT_Tau	-	monolink	144	n/a	-	2135.17	712.731	3	3.2	8	5.35
LQTAPVPMPDLKNVKSK-KVAVVRTPPK-a15-b1	WT_Tau	WT_Tau	intra-protein xl	257	225	32	3096.8	775.208	4	-2.7	1	5.35
YVIEAGHDTKAKANER-GADGKTKIATPR-a10-b5	reverse_WT_Tau	WT_Tau	intra-protein xl	57	148	91	3152.67	631.542	5	4.1	1	5.32
CGSLGNIHHKPGGGQVEVK-KPERTPPTPLSPTRSR-a10-b1	WT_Tau	reverse_WT_Tau	intra-protein xl	331	218	113	3930.06	787.02	5	-1.2	3	5.23
TPPSSGEPPKSGDR-KNIIQVK-a10-b1	WT_Tau	reverse_WT_Tau	intra-protein xl	190	162	28	2390.28	797.769	3	0.8	1	5.2
TPPKSPSSAK-AKANER-a4-b2	WT_Tau	reverse_WT_Tau	intra-protein xl	234	59	175	1823.97	608.998	3	-2.1	1	5.2
TANAQGKQGPPAAGRPTAIKTK-VNKLDPMPVPATQLRSK-a7-b3	reverse_WT_Tau	reverse_WT_Tau	intra-protein xl	279	188	91	4193.3	1049.33	4	-3.5	1	5.19
FDLKESKVEVQGGGPK-K7-K16	reverse_WT_Tau	-	intralink	102	111	9	1854.97	619.331	3	-1.2	1	5.17
IPAKTPPAPKTPPSSGEPPK-K4-K10	WT_Tau	-	intralink	174	180	6	2134.17	712.398	3	0.8	3	5.15
ESKVEVQGGGPK-VVAVKKPER-a3-b5	reverse_WT_Tau	reverse_WT_Tau	intra-protein xl	102	217	115	2376.33	793.118	3	-3.6	3	5.13
DGSKPPEGSSPPTKPAPPTKAPIR-QGPPAAGRPTAIKTK-a4-b13	reverse_WT_Tau	reverse_WT_Tau	intra-protein xl	252	292	40	4041.2	1348.07	3	-0.3	2	5.12
SKIGSTENLKHQPGGGK-SKIGSTENLK-a10-b2	WT_Tau	WT_Tau	intra-protein xl	267	259	8	2950.59	738.654	4	4.4	3	5.09
LGADTDGEQDQHMTYGGQDKRDGLGYTGAHDEMVEFEQRPEAX-VNKLDPMPVPATQLR-a20-b3	reverse_WT_Tau	reverse_WT_Tau	intra-protein xl	418	188	230	6616.05	1324.22	5	3	2	5.09
GGGPQHKLNETSGIKSK-KIETHK-a7-b1	reverse_WT_Tau	WT_Tau	intra-protein xl	175	370	195	2629.41	877.478	3	-2.6	1	5.07
SGCKSQVNSLDLKK-ESKVEVQGGGPK-a4-b3	reverse_WT_Tau	reverse_WT_Tau	intra-protein xl	152	102	50	2914.52	972.515	3	4.9	1	5.04
SGCKSQVNSLDLKK-HQPGGGKVQIINK-a13-b7	reverse_WT_Tau	WT_Tau	intra-protein xl	161	274	113	3075.65	769.919	4	-1.4	1	5.04
INDKSGCKSQVNSLDLK-KDDSGTGDKSK-a8-b9	reverse_WT_Tau	reverse_WT_Tau	intra-protein xl	152	310	158	3179.55	1060.86	3	-3.9	1	5.01
VNKLDPXPVPATQLR-K3-156	reverse_WT_Tau	-	monolink	188	n/a	-	1850.01	617.676	3	4	1	5
GAAPPGQKGQANATR-KDDSGTGDKSK-a8-b9	WT_Tau	reverse_WT_Tau	intra-protein xl	163	310	147	2697.32	675.338	4	-4.8	1	4.97
YVIQVSGGGPVHKINDK-ESKVEVQGGGPK-a13-b3	reverse_WT_Tau	reverse_WT_Tau	intra-protein xl	144	102	42	3161.68	791.428	4	2.5	2	4.96
KNGGGPVHTINDLSGIK-SKASSPSKPPTR-a1-b2	reverse_WT_Tau	reverse_WT_Tau	intra-protein xl	73	202	129	3085.65	1029.56	3	0.2	1	4.9
LQTAPVPMPDLKNVK-KPERTPPTPLSPTR-a12-b1	WT_Tau	reverse_WT_Tau	intra-protein xl	254	218	36	3363.88	1122.3	3	4.9	2	4.88
SEKLDFKDR-SEKLDFKDR-a3-b7	WT_Tau	WT_Tau	intra-protein xl	343	347	4	2411.22	804.749	3	-3.6	1	4.87
IGSLDNITHVPGGGNKK-LQTAPVPXPDLKNVKSK-a16-b15	WT_Tau	WT_Tau	intra-protein xl	369	257	112	3725.03	746.014	5	3.5	1	4.84
GAAPPGQKGQANATRIPAK-GGGPQHKLNETSGIKSK-a8-b15	WT_Tau	reverse_WT_Tau	intra-protein xl	163	183	20	3706.98	927.753	4	-1.9	4	4.8
ASSPSKPPTRVVAVK-SKSVXR-a6-b2	reverse_WT_Tau	reverse_WT_Tau	intra-protein xl	208	312	104	2383.33	795.451	3	1.8	1	4.79
NVKSKIGSTENLK-SKIGSTENLK-a3-b2	WT_Tau	WT_Tau	intra-protein xl	257	259	2	2630.44	877.821	3	-3.4	1	4.78
HHINGLSGCKSTVKSLDVPK-K10-155	reverse_WT_Tau	-	monolink	121	n/a	-	2331.24	778.088	3	1.3	2	4.78
QEFEVXEDHAGTYGLGDRKDQGGYTMHQDQEGDTDAGLK-SPSSAKSRLQTAPVPXPDLK-a19-b6	WT_Tau	WT_Tau	intra-protein xl	24	240	216	6607.05	1322.42	5	0.5	1	4.75
TPSLPTPPTREPKK-NIIQVKGGGPQHK-a13-b6	WT_Tau	reverse_WT_Tau	intra-protein xl	224	168	56	3060.72	766.188	4	3.9	1	4.7
NIIQVKGGGPQHK-SGCKSQVNSLDLK-a6-b4	reverse_WT_Tau	reverse_WT_Tau	intra-protein xl	168	152	16	2947.55	983.526	3	0	2	4.69
IPAKTPPAPKTPPSSGEPPK-SKIGSTENLK-a10-b2	WT_Tau	WT_Tau	intra-protein xl	180	259	79	3209.76	803.447	4	0.9	1	4.66
GADGKTKIATPR-AKANERFTLK-a5-b2	WT_Tau	reverse_WT_Tau	intra-protein xl	148	59	89	2528.41	843.812	3	2.1	1	4.63
DNIKHVPGGGSVQIVYKPVDLSKVTSK-DGSKPPEGSSPPTKPAPPTK-a23-b4	WT_Tau	reverse_WT_Tau	intra-protein xl	317	252	65	4976.63	830.446	6	-3.6	1	4.58
DNIKHVPGGGSVQIVYKPVDLSK-STVKSLDVPK-a17-b4	WT_Tau	reverse_WT_Tau	intra-protein xl	311	125	186	3660.02	1221.01	3	0.9	1	4.57
IPAKTPPAPKTPPSSGEPPK-VQSKIGSLDNITHVPGGGNK-a4-b4	WT_Tau	WT_Tau	intra-protein xl	174	353	179	4154.25	1039.57	4	2	2	4.52
AKTDHGAEIVYKSPVVSGDTSPR-IPAKTPPAPKTPPSSGEPPK-a2-b4	WT_Tau	WT_Tau	intra-protein xl	385	174	211	4547.37	758.903	6	-4.9	1	4.52
IPAKTPPAPKTPPSSGEPPK-KPERTPPTPLSPTRSR-a10-b1	WT_Tau	reverse_WT_Tau	intra-protein xl	180	218	38	3953.18	989.302	4	0.9	1	4.5
YVIEAGHDTKAKANER-TKIATPRGAAPPGQK-a12-b2	reverse_WT_Tau	WT_Tau	intra-protein xl	59	150	91	3430.82	858.712	4	-4.4	1	4.47
TANAQGKQGPPAAGRPTAIKTK-EPKKVAVVR-a7-b4	reverse_WT_Tau	WT_Tau	intra-protein xl	279	225	54	3324.91	832.234	4	1.8	1	4.43
SLDVPKYVIQVSGGGPVHKINDK-K19-K23	reverse_WT_Tau	-	intralink	144	148	4	2587.4	863.475	3	0.5	1	4.42
TANAQGKQGPPAAGRPTAIKTK-SRLQTAPVPMPDLKNVK-a7-b14	reverse_WT_Tau	WT_Tau	intra-protein xl	279	254	25	4193.3	1049.33	4	-3.5	1	4.41
QEFEVXEDHAGTYGLGDRKDQGGYTMHQDQEGDTDAGLK-VQSKIGSLDNITHVPGGGNKK-a19-b20	WT_Tau	WT_Tau	intra-protein xl	24	369	345	6630.08	1327.02	5	-2.4	2	4.39
SKIGSTENLKHQPGGGK-AKANERFTLK-a10-b2	WT_Tau	reverse_WT_Tau	intra-protein xl	267	59	208	3051.65	1018.22	3	0.3	2	4.37
AKTDHGAEIVYKSPVVSGDTSPR-KLDLSNVQSKCGSK-a2-b1	WT_Tau	WT_Tau	intra-protein xl	385	281	104	4114.1	1029.53	4	-1.1	1	4.33
TPPAPKTPPSSGEPPK-ESKVEVQGGGPK-a6-b3	WT_Tau	reverse_WT_Tau	intra-protein xl	180	102	78	2938.54	980.52	3	3	2	4.3
GAAPPGQKGQANATRIPAK-SKASSPSKPPTR-a8-b8	WT_Tau	reverse_WT_Tau	intra-protein xl	163	208	45	3211.74	1071.59	3	0.2	1	4.28
QEFEVXEDHAGTYGLGDRKDQGGYTMHQDQEGDTDAGLK-VQSKIGSLDNITHVPGGGNKK-a19-b4	WT_Tau	WT_Tau	intra-protein xl	24	353	329	6630.08	1106.02	6	-1.9	2	4.26
GAAPPGQKGQANATRIPAK-SKASSPSKPPTR-a8-b2	WT_Tau	reverse_WT_Tau	intra-protein xl	163	202	39	3211.75	1071.59	3	1	2	4.25
KNIIQVKGGGPQHK-MVSKSKDGTGSDDK-a7-b4	reverse_WT_Tau	WT_Tau	intra-protein xl	168	130	38	3094.61	1032.55	3	1.9	1	4.2
TANAQGKQGPPAAGRPTAIKTK-CGSLGNIHHKPGGGQVEVK-a20-b10	reverse_WT_Tau	WT_Tau	intra-protein xl	292	331	39	4273.27	1425.43	3	4.4	1	4.19
HVPGGGSVQIVYKPVDLSKVTSK-K23-156	WT_Tau	-	monolink	321	n/a	-	2550.41	851.143	3	-0.4	2	4.17
LGADTDGEQDQHMTYGGQDKRDGLGYTGAHDEMVEFEQRPEAX-VNKLDPXPVPATQLR-a20-b3	reverse_WT_Tau	reverse_WT_Tau	intra-protein xl	418	188	230	6632.06	1327.42	5	5	1	4.08
GADGKTKIATPR-KVAVVRTPPK-a5-b1	WT_Tau	WT_Tau	intra-protein xl	148	225	77	2445.45	816.159	3	4.6	1	3.99
DGSKPPEGSSPPTKPAPPTKAPIR-GGGPQHKLNETSGIK-a20-b7	reverse_WT_Tau	reverse_WT_Tau	intra-protein xl	268	175	93	4071.15	1358.06	3	2.8	1	3.96
SKIGSTENLK-SEKLDFKDR-a2-b7	WT_Tau	WT_Tau	intra-protein xl	259	347	88	2350.23	784.417	3	-4.6	1	3.94
HQPGGGKVQIINKK-MVSKSKDGTGSDDK-a13-b4	WT_Tau	WT_Tau	intra-protein xl	280	130	150	3094.61	1032.54	3	-0.2	6	3.87
GAAPPGQKGQANATRIPAK-VNKLDPXPVPATQLR-a8-b3	WT_Tau	reverse_WT_Tau	intra-protein xl	163	188	25	3663.99	917.005	4	-0.3	2	3.83
IPAKTPPAPKTPPSSGEPPK-K4-K20	WT_Tau	-	intralink	174	190	16	2134.18	712.4	3	4.6	8	3.83
TPPAPKTPPSSGEPPK-QGPPAAGRPTAIKTK-a6-b13	WT_Tau	reverse_WT_Tau	intra-protein xl	180	292	112	3216.76	1073.26	3	1.7	1	3.79
GGGPQHKLNETSGIKSK-SKIGSTENLK-a7-b2	reverse_WT_Tau	WT_Tau	intra-protein xl	175	259	84	2950.58	984.533	3	1.5	1	3.78
AKTDHGAEIVYKSPVVSGDTSPR-K12-156	WT_Tau	-	monolink	395	n/a	-	2569.3	857.442	3	0.3	1	3.77
DNIKHVPGGGSVQIVYKPVDLSKVTSK-K4-155	WT_Tau	-	monolink	298	n/a	-	3019.66	1007.56	3	-3.3	1	3.76
SKIGSTENLKHQPGGGK-SKASSPSKPPTR-a10-b2	WT_Tau	reverse_WT_Tau	intra-protein xl	267	202	65	3116.66	1039.89	3	0.7	1	3.65
YVIQVSGGGPVHKINDKSGCK-SKVNKLDPXPVPATQLR-a13-b5	reverse_WT_Tau	reverse_WT_Tau	intra-protein xl	144	188	44	4289.28	1073.33	4	2.8	3	3.52
DGSKPPEGSSPPTKPAPPTK-TPPAPKTPPSSGEPPKSGDR-a14-b6	reverse_WT_Tau	WT_Tau	intra-protein xl	262	180	82	4114.1	823.828	5	3.1	1	3.4
TPSLPTPPTREPKK-SEKLDFKDR-a13-b3	WT_Tau	WT_Tau	intra-protein xl	224	343	119	2822.53	941.852	3	4.8	1	3.38
GAAPPGQKGQANATRIPAK-TPPKSPSSAKSR-a8-b4	WT_Tau	WT_Tau	intra-protein xl	163	234	71	3211.76	1071.59	3	4.1	1	3.36
DGSKPPEGSSPPTKPAPPTKAPIR-GGGPQHKLNETSGIK-a4-b7	reverse_WT_Tau	reverse_WT_Tau	intra-protein xl	252	175	77	4071.15	1358.06	3	2.8	1	3.35
ADSTESGPEESGDETPTQLPSEKLGADTDGEQDQHMTYGGQDKR-KPERTPPTPLSPTRSR-a43-b1	reverse_WT_Tau	reverse_WT_Tau	intra-protein xl	418	218	200	6650.07	1109.35	6	-3	4	3.33
KPERTPPTPLSPTRSR-SKDGTGSDDKK-a1-b2	reverse_WT_Tau	WT_Tau	intra-protein xl	218	132	86	3093.61	1032.21	3	1.8	1	3.31
LDLSNVQSKCGSK-SKDGTGSDDK-a9-b2	WT_Tau	WT_Tau	intra-protein xl	290	132	158	2581.21	861.412	3	-2.1	2	3.25
AKTDHGAEIVYKSPVVSGDTSPR-K2-156	WT_Tau	-	monolink	385	n/a	-	2569.29	857.438	3	-4.9	2	3.24
CGSKDNIKHVPGGGSVQIVYKPVDLSK-K4-K21	WT_Tau	-	intralink	294	311	17	3019.59	1007.54	3	2.6	1	3.19
SGCKSQVNSLDLKK-SQVNSLDLKK-a4-b9	reverse_WT_Tau	reverse_WT_Tau	intra-protein xl	152	161	9	2831.5	944.841	3	-2.2	1	3.16
IGSLDNITHVPGGGNKKIETHK-KIETHKLTFR-a17-b6	WT_Tau	WT_Tau	intra-protein xl	370	375	5	3724.03	1242.35	3	-3.3	1	3.15
QEFEVMEDHAGTYGLGDRKDQGGYTXHQDQEGDTDAGLK-VQSKIGSLDNITHVPGGGNKK-a19-b20	WT_Tau	WT_Tau	intra-protein xl	24	369	345	6630.08	1327.02	5	-2.4	1	3.12
TPPKSPSSAKSR-YVIEAGHDTKAK-a4-b10	WT_Tau	reverse_WT_Tau	intra-protein xl	234	57	177	2710.43	904.484	3	-0.5	1	3.1
TDHGAEIVYKSPVVSGDTSPR-AKANERFTLK-a10-b2	WT_Tau	reverse_WT_Tau	intra-protein xl	395	59	336	3528.83	1177.29	3	3.6	1	3.07
QEFEVMEDHAGTYGLGDRKDQGGYTMHQDQEGDTDAGLK-VQSKIGSLDNITHVPGGGNKK-a19-b4	WT_Tau	WT_Tau	intra-protein xl	24	353	329	6614.07	1323.82	5	-3.7	2	3.02
TDHGAEIVYKSPVVSGDTSPR-VQIINKKLDLSNVQSK-a10-b6	WT_Tau	WT_Tau	intra-protein xl	395	280	115	4178.23	1045.56	4	1	1	2.99
AKTDHGAEIVYKSPVVSGDTSPR-SGCKSQVNSLDLKK-a2-b13	WT_Tau	reverse_WT_Tau	intra-protein xl	385	161	224	4114.1	1372.38	3	-0.1	1	2.99
TKIATPRGAAPPGQK-SKASSPSKPPTR-a2-b2	WT_Tau	reverse_WT_Tau	intra-protein xl	150	202	52	2871.59	718.904	4	-2.6	2	2.97
GAAPPGQKGQANATR-HQPGGGKVQIINKK-a8-b7	WT_Tau	WT_Tau	intra-protein xl	163	274	111	3063.67	1022.23	3	1.1	1	2.94
CGSLGNIHHKPGGGQVEVKSEK-K10-155	WT_Tau	-	monolink	331	n/a	-	2472.25	825.09	3	-3.3	1	2.92
IATPRGAAPPGQKGQANATR-SKIGSTENLKHQPGGGK-a13-b2	WT_Tau	WT_Tau	intra-protein xl	163	259	96	3836.06	960.023	4	4.8	1	2.89
LQTAPVPXPDLKNVKSK-STVKSLDVPK-a12-b4	WT_Tau	reverse_WT_Tau	intra-protein xl	254	125	129	3091.71	1031.58	3	-4.5	1	2.86
GAAPPGQKGQANATR-HQPGGGKVQIINKK-a8-b13	WT_Tau	WT_Tau	intra-protein xl	163	280	117	3063.68	1022.23	3	2.6	1	2.84
KPERTPPTPLSPTRSR-KDDSGTGDKSK-a1-b1	reverse_WT_Tau	reverse_WT_Tau	intra-protein xl	218	302	84	3093.61	1032.21	3	1.8	1	2.77
KNGGGPVHTINDLSGIKSQVR-SKDGTGSDDKK-a1-b10	reverse_WT_Tau	WT_Tau	intra-protein xl	73	140	67	3450.76	1151.26	3	-2.6	2	2.65
DGSKPPEGSSPPTKPAPPTK-SKASSPSKPPTRVVAVK-a4-b8	reverse_WT_Tau	reverse_WT_Tau	intra-protein xl	252	208	44	3850.1	963.532	4	3.3	1	2.52
GGGPQHKLNETSGIKSK-SKIGSTENLK-a15-b2	reverse_WT_Tau	WT_Tau	intra-protein xl	183	259	76	2950.58	984.533	3	1.5	3	2.5
LDLSNVQSKCGSKDNIK-TPSLPTPPTREPKK-a9-b13	WT_Tau	WT_Tau	intra-protein xl	290	224	66	3590.89	898.731	4	-1.3	1	2.5
DGSKPPEGSSPPTKPAPPTK-K20-156	reverse_WT_Tau	-	monolink	268	n/a	-	2130.07	711.033	3	-4.6	5	2.45
SKVNKLDPXPVPATQLR-LNETSGIKSK-a2-b8	reverse_WT_Tau	reverse_WT_Tau	intra-protein xl	185	183	2	3122.71	781.685	4	2.1	1	2.44
KNIIQVKGGGPQHK-MVSKSKDGTGSDDK-a1-b6	reverse_WT_Tau	WT_Tau	intra-protein xl	162	132	30	3094.61	1032.55	3	0.9	1	2.36
VEVQGGGPKHHINGLSGCK-SKASSPSKPPTRVVAVK-a9-b2	reverse_WT_Tau	reverse_WT_Tau	intra-protein xl	111	202	91	3849.09	1284.04	3	4.9	1	2.21
NGGGPVHTINDLSGIKSQVR-STVKSLDVPK-a16-b4	reverse_WT_Tau	reverse_WT_Tau	intra-protein xl	89	125	36	3258.76	1087.26	3	2.4	1	2.16
TANAQGKQGPPAAGRPTAIK-KLDLSNVQSK-a7-b1	reverse_WT_Tau	WT_Tau	intra-protein xl	279	281	2	3201.73	1068.25	3	-4.2	2	2.07
HQPGGGKVQIINKK-SGCKSQVNSLDLK-a7-b4	WT_Tau	reverse_WT_Tau	intra-protein xl	274	152	122	3075.65	1026.22	3	-0.3	1	2.04
LDPMPVPATQLRSKASSPSKPPTR-VNKLDPMPVPATQLR-a20-b3	reverse_WT_Tau	reverse_WT_Tau	intra-protein xl	208	188	20	4376.37	876.282	5	-0.3	1	2.02
XVSKSKDGTGSDDK-KVAVVRTPPK-a6-b1	WT_Tau	WT_Tau	intra-protein xl	132	225	93	2701.44	901.489	3	4.1	1	1.99
VQSKIGSLDNITHVPGGGNK-GQANATRIPAKTPPAPK-a4-b11	WT_Tau	WT_Tau	intra-protein xl	353	174	179	3875.1	1292.71	3	-0.7	3	1.94
GAAPPGQKGQANATRIPAK-SKIGSTENLKHQPGGGK-a8-b10	WT_Tau	WT_Tau	intra-protein xl	163	267	104	3706.98	927.752	4	-2.2	1	1.87
LDLSNVQSKCGSKDNIK-KPERTPPTPLSPTRSR-a13-b1	WT_Tau	reverse_WT_Tau	intra-protein xl	294	218	76	3862.05	966.519	4	2.1	1	1.87
QEFEVMEDHAGTYGLGDRKDQGGYTXHQDQEGDTDAGLK-VQSKIGSLDNITHVPGGGNKK-a19-b4	WT_Tau	WT_Tau	intra-protein xl	24	353	329	6630.08	1327.02	5	-2.7	1	1.78
HHINGLSGCKSTVKSLDVPK-KIETHKLTFR-a10-b1	reverse_WT_Tau	WT_Tau	intra-protein xl	121	370	249	3585.96	1196.33	3	3.4	1	1.71
TANAQGKQGPPAAGRPTAIKTK-SKDGTGSDDKK-a20-b2	reverse_WT_Tau	WT_Tau	intra-protein xl	292	132	160	3436.8	860.209	4	4	1	1.71
KDQGGYTMHQDQEGDTDAGLKESPLQTPTEDGSEEPGSETSDAK-YVIQVSGGGPVHKINDK-a21-b13	WT_Tau	reverse_WT_Tau	intra-protein xl	44	144	100	6613.07	1103.19	6	3.9	1	1.63
DGSKPPEGSSPPTKPAPPTKAPIR-QGPPAAGRPTAIKTK-a20-b13	reverse_WT_Tau	reverse_WT_Tau	intra-protein xl	268	292	24	4041.2	1348.08	3	-0.1	2	1.57
VNKLDPMPVPATQLR-TPSLPTPPTREPKK-a3-b13	reverse_WT_Tau	WT_Tau	intra-protein xl	188	224	36	3363.88	1122.3	3	4.9	2	1.57
YVIQVSGGGPVHKINDKSGCK-VNKLDPXPVPATQLR-a17-b3	reverse_WT_Tau	reverse_WT_Tau	intra-protein xl	148	188	40	4074.13	1019.54	4	-2.2	1	1.55
GAAPPGQKGQANATRIPAK-FDLKESKVEVQGGGPK-a8-b4	WT_Tau	reverse_WT_Tau	intra-protein xl	163	99	64	3686.98	1230	3	0.7	1	1.49
DGSKPPEGSSPPTKPAPPTKAPIR-TKIATPRGAAPPGQK-a20-b2	reverse_WT_Tau	WT_Tau	intra-protein xl	268	150	118	4041.2	1348.08	3	-0.1	1	1.47
SRLQTAPVPXPDLKNVK-KPERTPPTPLSPTRSR-a14-b1	WT_Tau	reverse_WT_Tau	intra-protein xl	254	218	36	3866.12	967.537	4	-1	3	1.45
ASSPSKPPTRVVAVKKPER-KPERTPPTPLSPTRSR-a15-b1	reverse_WT_Tau	reverse_WT_Tau	intra-protein xl	217	218	1	3990.26	1331.09	3	2.3	1	1.43
CGSLGNIHHKPGGGQVEVK-SKASSPSKPPTRVVAVK-a10-b2	WT_Tau	reverse_WT_Tau	intra-protein xl	331	202	129	3849.09	1284.04	3	4.9	2	1.34
APIRTANAQGKQGPPAAGRPTAIK-VQSKIGSLDNITHVPGGGNKK-a11-b4	reverse_WT_Tau	WT_Tau	intra-protein xl	279	353	74	4656.55	777.099	6	-2.7	1	1.31
YVIEAGHDTKAKANER-QGPPAAGRPTAIKTK-a12-b13	reverse_WT_Tau	reverse_WT_Tau	intra-protein xl	59	292	233	3430.82	1144.62	3	-3	1	1.24
VQSKIGSLDNITHVPGGGNK-YVIQVSGGGPVHKINDK-a4-b13	WT_Tau	reverse_WT_Tau	intra-protein xl	353	144	209	3968.11	993.035	4	-0.5	1	1.19
SLDVPKYVIQVSGGGPVHK-K6-K19	reverse_WT_Tau	-	intralink	131	144	13	2117.15	706.725	3	-0.9	1	1.13
SPSSAKSRLQTAPVPMPDLK-YVIQVSGGGPVHKINDK-a6-b13	WT_Tau	reverse_WT_Tau	intra-protein xl	240	144	96	4057.17	1353.4	3	1.3	1	0.96
YVIQVSGGGPVHKINDK-K13-156	reverse_WT_Tau	-	monolink	144	n/a	-	1966.05	656.358	3	-1.5	1	0.6
AKTDHGAEIVYKSPVVSGDTSPR-K2-K12	WT_Tau	-	intralink	385	395	10	2551.3	851.44	3	2.3	1	0.15

## Sheet: Fig4f_WT2
Id	Protein1	Protein2	XLType	AbsPos1	AbsPos2	deltaAA	Mr	Mz	z	Error_rel[ppm]	nseen	ld-Score
VQIINKKLDLSNVQSK-K6-K7	WT_Tau	-	intralink	280	281	1	1964.13	655.718	3	0.2	19	52.51
HQPGGGKVQIINK-K7-156	WT_Tau	-	monolink	274	n/a	-	1530.85	511.292	3	0	9	51.19
HQPGGGKVQIINK-K7-155	WT_Tau	-	monolink	274	n/a	-	1529.87	510.963	3	-1.9	6	50.84
VQSKIGSLDNITHVPGGGNK-SEKLDFKDR-a4-b3	WT_Tau	WT_Tau	intra-protein xl	353	343	10	3294.72	824.688	4	0.2	6	49.23
IGSTENLKHQPGGGKVQIINK-K8-K15	WT_Tau	-	intralink	267	274	7	2355.29	786.105	3	-0.3	3	48.27
CGSLGNIHHKPGGGQVEVKSEK-K19-155	WT_Tau	-	monolink	340	n/a	-	2472.25	619.071	4	-1.5	6	47.93
DNIKHVPGGGSVQIVYKPVDLSK-K4-155	WT_Tau	-	monolink	298	n/a	-	2604.43	869.15	3	-1.4	14	47.36
LDLSNVQSKCGSK-K9-155	WT_Tau	-	monolink	290	n/a	-	1589.81	530.944	3	-1.6	1	46.84
HVPGGGSVQIVYKPVDLSKVTSK-K19-155	WT_Tau	-	monolink	317	n/a	-	2549.42	638.363	4	-0.6	8	45.97
CGSLGNIHHKPGGGQVEVK-K10-155	WT_Tau	-	monolink	331	n/a	-	2128.08	533.029	4	-1.2	20	45.2
HVPGGGSVQIVYKPVDLSK-K13-156	WT_Tau	-	monolink	311	n/a	-	2135.17	712.73	3	2.4	409	44.04
HVPGGGSVQIVYKPVDLSKVTSK-K19-156	WT_Tau	-	monolink	317	n/a	-	2550.4	638.608	4	-1.3	39	44.03
LDLSNVQSKCGSKDNIK-K13-156	WT_Tau	-	monolink	294	n/a	-	2061.04	688.02	3	-1.6	2	43.77
HVPGGGSVQIVYKPVDLSK-K13-155	WT_Tau	-	monolink	311	n/a	-	2134.18	712.401	3	-0.5	412	43.59
KLDLSNVQSKCGSK-K10-156	WT_Tau	-	monolink	290	n/a	-	1718.89	573.97	3	0.1	3	43.2
DNIKHVPGGGSVQIVYKPVDLSK-K4-156	WT_Tau	-	monolink	298	n/a	-	2605.41	869.478	3	-0.6	37	42.92
LDLSNVQSKCGSK-VQIINKK-a9-b6	WT_Tau	WT_Tau	intra-protein xl	290	280	10	2414.32	805.781	3	-0.8	3	42.68
LDLSNVQSKCGSKDNIK-K9-K13	WT_Tau	-	intralink	290	294	4	2043.03	682.018	3	-0.5	3	42.65
IGSLDNITHVPGGGNKK-K17-156	WT_Tau	-	monolink	370	n/a	-	1861.99	621.671	3	-0.2	46	42.49
CGSLGNIHHKPGGGQVEVK-K10-156	WT_Tau	-	monolink	331	n/a	-	2129.07	533.275	4	-0.4	19	42.47
HVPGGGSVQIVYKPVDLSKVTSK-K13-K19	WT_Tau	-	intralink	311	317	6	2532.39	845.139	3	-0.4	122	41.97
SKIGSTENLK-VQIINKK-a2-b6	WT_Tau	WT_Tau	intra-protein xl	259	280	21	2055.19	514.805	4	-1.9	2	41.69
HVPGGGSVQIVYKPVDLSKVTSK-K19-K23	WT_Tau	-	intralink	317	321	4	2532.39	634.106	4	-0.6	4	41.56
IGSLDNITHVPGGGNKK-K16-155	WT_Tau	-	monolink	369	n/a	-	1861	621.342	3	-2.2	302	41.29
VQSKIGSLDNITHVPGGGNK-K4-155	WT_Tau	-	monolink	353	n/a	-	2175.16	726.063	3	-0.8	35	41.23
KLDLSNVQSK-SEKLDFK-a1-b3	WT_Tau	WT_Tau	intra-protein xl	281	343	62	2134.15	534.544	4	-3	1	41.04
KLDLSNVQSK-K10-155	WT_Tau	-	monolink	290	n/a	-	1285.72	429.582	3	-2.6	1	40.6
CGSLGNIHHKPGGGQVEVKSEK-K19-156	WT_Tau	-	monolink	340	n/a	-	2473.24	825.419	3	-1.6	14	40.49
KLDLSNVQSKCGSK-K10-K14	WT_Tau	-	intralink	290	294	4	1700.88	567.966	3	-0.4	4	40.42
VQIINKK-LDFKDR-a6-b4	WT_Tau	WT_Tau	intra-protein xl	280	347	67	1772.02	444.012	4	-1.9	2	39.96
VQSKIGSLDNITHVPGGGNK-KLDLSNVQSK-a4-b1	WT_Tau	WT_Tau	intra-protein xl	353	281	72	3288.76	823.198	4	-2	4	39.91
IGSLDNITHVPGGGNKK-K16-156	WT_Tau	-	monolink	369	n/a	-	1861.99	621.672	3	0.9	150	39.88
KLDLSNVQSKCGSK-K10-155	WT_Tau	-	monolink	290	n/a	-	1717.9	573.642	3	-1.7	1	39.75
IGSTENLKHQPGGGK-KLDLSNVQSK-a8-b1	WT_Tau	WT_Tau	intra-protein xl	267	281	14	2790.49	931.169	3	-0.9	12	39.4
KIETHKLTFR-K6-155	WT_Tau	-	monolink	375	n/a	-	1426.83	476.617	3	-2.5	2	39.21
IGSLDNITHVPGGGNKKIETHK-K16-K17	WT_Tau	-	intralink	369	370	1	2452.31	614.085	4	0.2	9	38.99
IETHKLTFR-K5-155	WT_Tau	-	monolink	375	n/a	-	1298.73	433.918	3	-3.7	1	38.86
KLDLSNVQSK-SKIGSTENLK-a1-b2	WT_Tau	WT_Tau	intra-protein xl	281	259	22	2344.28	587.078	4	-1.6	3	38.68
SEKLDFKDR-K3-155	WT_Tau	-	monolink	343	n/a	-	1291.67	431.566	3	-3.1	2	38.29
KLDLSNVQSK-LDFKDR-a1-b4	WT_Tau	WT_Tau	intra-protein xl	281	347	66	2061.11	516.285	4	-1.3	3	38.28
HQPGGGKVQIINK-SKIGSTENLK-a7-b2	WT_Tau	WT_Tau	intra-protein xl	274	259	15	2588.43	648.115	4	-0.2	3	38.17
VQSKIGSLDNITHVPGGGNK-K4-156	WT_Tau	-	monolink	353	n/a	-	2176.15	726.391	3	0.9	33	38.14
VQSKIGSLDNITHVPGGGNKK-K4-155	WT_Tau	-	monolink	353	n/a	-	2303.26	576.822	4	-2.4	9	37.74
CGSLGNIHHKPGGGQVEVKSEK-K22-155	WT_Tau	-	monolink	343	n/a	-	2472.25	825.092	3	-1.4	1	37.55
CGSKDNIK-SEKLDFK-a4-b3	WT_Tau	WT_Tau	intra-protein xl	294	343	49	1923.96	642.327	3	-1.6	1	37.49
KLDLSNVQSKCGSK-HQPGGGKVQIINK-a10-b7	WT_Tau	WT_Tau	intra-protein xl	290	274	16	3075.65	616.137	5	-1.4	1	37.48
IGSLDNITHVPGGGNKK-SEKLDFKDR-a16-b7	WT_Tau	WT_Tau	intra-protein xl	369	347	22	2980.56	746.148	4	-0.7	5	37.46
KIETHKLTFR-K6-156	WT_Tau	-	monolink	375	n/a	-	1427.81	476.945	3	-1.9	3	36.98
VQIINKK-KIETHK-a6-b1	WT_Tau	WT_Tau	intra-protein xl	280	370	90	1734.04	434.517	4	-1	2	36.94
CGSLGNIHHKPGGGQVEVKSEK-LDFKDR-a19-b4	WT_Tau	WT_Tau	intra-protein xl	340	347	7	3247.64	650.535	5	-0.9	3	36.88
CGSLGNIHHKPGGGQVEVK-VQIINKK-a10-b6	WT_Tau	WT_Tau	intra-protein xl	331	280	51	2952.59	739.156	4	-0.7	2	36.87
CGSLGNIHHKPGGGQVEVKSEKLDFK-K19-155	WT_Tau	-	monolink	340	n/a	-	2975.53	992.85	3	-1.4	2	36.87
IGSTENLKHQPGGGK-K8-155	WT_Tau	-	monolink	267	n/a	-	1676.88	559.969	3	-2	10	36.78
IGSTENLKHQPGGGK-VQIINKK-a8-b6	WT_Tau	WT_Tau	intra-protein xl	267	280	13	2501.39	501.287	5	-0.9	3	36.78
VTSKCGSLGNIHHKPGGGQVEVK-KLDLSNVQSKCGSK-a4-b10	WT_Tau	WT_Tau	intra-protein xl	321	290	31	4089.11	1023.28	4	-0.1	2	36.73
IGSLDNITHVPGGGNKK-K17-155	WT_Tau	-	monolink	370	n/a	-	1861.01	621.343	3	-1.5	63	36.67
HQPGGGKVQIINKK-K7-155	WT_Tau	-	monolink	274	n/a	-	1657.96	553.662	3	-1.9	2	36.57
IGSLDNITHVPGGGNKK-IGSTENLKHQPGGGK-a16-b8	WT_Tau	WT_Tau	intra-protein xl	369	267	102	3365.77	842.45	4	-0.6	1	36.51
VQSKIGSLDNITHVPGGGNK-SEKLDFK-a4-b3	WT_Tau	WT_Tau	intra-protein xl	353	343	10	3023.59	1008.87	3	-0.2	12	36.42
SEKLDFK-VQIINKK-a3-b6	WT_Tau	WT_Tau	intra-protein xl	343	280	63	1845.06	462.273	4	-0.9	2	36.25
CGSLGNIHHKPGGGQVEVK-SEKLDFK-a10-b3	WT_Tau	WT_Tau	intra-protein xl	331	343	12	2976.51	745.135	4	-0.9	7	36.17
VTSKCGSLGNIHHKPGGGQVEVK-K4-156	WT_Tau	-	monolink	321	n/a	-	2544.3	849.109	3	-2.8	51	35.96
IGSTENLKHQPGGGK-KLDLSNVQSKCGSK-a8-b10	WT_Tau	WT_Tau	intra-protein xl	267	290	23	3222.66	806.673	4	-2.3	1	35.9
CGSLGNIHHKPGGGQVEVKSEKLDFK-K19-156	WT_Tau	-	monolink	340	n/a	-	2976.53	993.183	3	4.8	1	35.84
CGSLGNIHHKPGGGQVEVKSEKLDFK-K19-K22	WT_Tau	-	intralink	340	343	3	2958.5	987.175	3	-0.4	4	35.8
LDLSNVQSKCGSKDNIK-K9-155	WT_Tau	-	monolink	290	n/a	-	2060.05	687.692	3	-2.4	3	35.75
DNIKHVPGGGSVQIVYKPVDLSK-KLDLSNVQSKCGSK-a4-b10	WT_Tau	WT_Tau	intra-protein xl	298	290	8	4150.21	1038.56	4	-0.9	4	35.72
IGSLDNITHVPGGGNKK-SEKLDFK-a16-b3	WT_Tau	WT_Tau	intra-protein xl	369	343	26	2709.43	542.894	5	-1	7	35.35
KLDLSNVQSKCGSK-SKIGSTENLK-a10-b2	WT_Tau	WT_Tau	intra-protein xl	290	259	31	2776.46	926.494	3	-2	2	35.34
IGSTENLKHQPGGGK-K8-156	WT_Tau	-	monolink	267	n/a	-	1677.87	560.297	3	-0.5	5	35.26
VQSKIGSLDNITHVPGGGNK-LDFKDR-a4-b4	WT_Tau	WT_Tau	intra-protein xl	353	347	6	2950.55	738.645	4	-0.3	8	35.19
IETHKLTFR-K5-156	WT_Tau	-	monolink	375	n/a	-	1299.72	434.246	3	-2.3	2	35.18
VTSKCGSLGNIHHKPGGGQVEVK-K4-155	WT_Tau	-	monolink	321	n/a	-	2543.32	636.838	4	-3.1	16	35.09
SKIGSTENLK-LDFKDR-a2-b4	WT_Tau	WT_Tau	intra-protein xl	259	347	88	2006.07	669.697	3	-0.9	3	34.91
LDLSNVQSKCGSK-KIETHK-a9-b1	WT_Tau	WT_Tau	intra-protein xl	290	370	80	2327.21	776.745	3	-1.8	1	34.91
KLDLSNVQSK-CGSKDNIK-a1-b4	WT_Tau	WT_Tau	intra-protein xl	281	294	13	2189.14	548.292	4	-0.6	7	34.85
VTSKCGSLGNIHHKPGGGQVEVK-SEKLDFK-a4-b3	WT_Tau	WT_Tau	intra-protein xl	321	343	22	3391.75	679.359	5	-0.6	4	34.82
KIETHK-LDFKDR-a1-b4	WT_Tau	WT_Tau	intra-protein xl	370	347	23	1684.91	422.236	4	-2.1	3	34.75
DNIKHVPGGGSVQIVYKPVDLSK-IGSTENLKHQPGGGK-a4-b8	WT_Tau	WT_Tau	intra-protein xl	298	267	31	4109.19	1370.74	3	-1.2	3	34.75
SEKLDFKDR-KIETHK-a7-b1	WT_Tau	WT_Tau	intra-protein xl	347	370	23	2029.08	677.368	3	-1.3	3	34.73
HVPGGGSVQIVYKPVDLSK-KLDLSNVQSK-a13-b1	WT_Tau	WT_Tau	intra-protein xl	311	281	30	3247.78	650.563	5	-1.1	2	34.71
VTSKCGSLGNIHHKPGGGQVEVK-VQIINKK-a4-b6	WT_Tau	WT_Tau	intra-protein xl	321	280	41	3367.84	842.967	4	-1.1	1	34.69
HVPGGGSVQIVYKPVDLSK-SEKLDFK-a13-b3	WT_Tau	WT_Tau	intra-protein xl	311	343	32	2982.6	746.658	4	-1.6	2	34.66
HQPGGGKVQIINKK-K7-156	WT_Tau	-	monolink	274	n/a	-	1658.94	553.99	3	-1.1	3	34.62
LDLSNVQSKCGSK-SKIGSTENLK-a9-b2	WT_Tau	WT_Tau	intra-protein xl	290	259	31	2648.37	883.797	3	-1.1	2	34.5
VTSKCGSLGNIHHKPGGGQVEVK-K4-K14	WT_Tau	-	intralink	321	331	10	2526.3	632.583	4	-0.8	51	34.33
VQSKIGSLDNITHVPGGGNK-KIETHK-a4-b1	WT_Tau	WT_Tau	intra-protein xl	353	370	17	2912.57	971.864	3	-0.7	11	34.23
CGSLGNIHHKPGGGQVEVK-SKIGSTENLK-a10-b2	WT_Tau	WT_Tau	intra-protein xl	331	259	72	3186.64	797.666	4	-3.5	1	33.9
SEKLDFK-KIETHK-a3-b1	WT_Tau	WT_Tau	intra-protein xl	343	370	27	1757.95	352.598	5	-2	3	33.86
IGSTENLKHQPGGGK-CGSKDNIK-a8-b4	WT_Tau	WT_Tau	intra-protein xl	267	294	27	2580.29	646.081	4	-1.2	3	33.82
IGSLDNITHVPGGGNKK-IETHKLTFR-a16-b5	WT_Tau	WT_Tau	intra-protein xl	369	375	6	2987.62	747.913	4	0.2	1	33.52
IGSTENLKHQPGGGK-KIETHK-a8-b1	WT_Tau	WT_Tau	intra-protein xl	267	370	103	2414.29	805.772	3	-0.3	2	33.49
SEKLDFKDR-K3-156	WT_Tau	-	monolink	343	n/a	-	1292.66	431.894	3	-1.5	6	33.44
CGSLGNIHHKPGGGQVEVK-SEKLDFKDR-a10-b3	WT_Tau	WT_Tau	intra-protein xl	331	343	12	3247.64	812.917	4	-1.7	3	33.39
SKIGSTENLK-SEKLDFK-a2-b3	WT_Tau	WT_Tau	intra-protein xl	259	343	84	2079.11	694.044	3	-0.9	1	33.33
VTSKCGSLGNIHHKPGGGQVEVK-KIETHK-a4-b1	WT_Tau	WT_Tau	intra-protein xl	321	370	49	3280.73	821.191	4	-1.2	2	33.22
CGSKDNIKHVPGGGSVQIVYKPVDLSK-K4-K8	WT_Tau	-	intralink	294	298	4	3019.58	1007.53	3	-0.3	4	33.16
IGSLDNITHVPGGGNKK-LDFKDR-a16-b4	WT_Tau	WT_Tau	intra-protein xl	369	347	22	2636.39	528.286	5	-1.2	2	32.99
HVPGGGSVQIVYKPVDLSK-VQIINKK-a13-b6	WT_Tau	WT_Tau	intra-protein xl	311	280	31	2958.69	592.746	5	-0.5	2	32.85
IGSLDNITHVPGGGNKK-SKIGSTENLK-a16-b2	WT_Tau	WT_Tau	intra-protein xl	369	259	110	2919.57	730.899	4	-0.6	2	32.39
VQSKIGSLDNITHVPGGGNK-K4-K20	WT_Tau	-	intralink	353	369	16	2158.14	720.388	3	0.4	9	32.26
VTSKCGSLGNIHHKPGGGQVEVK-SEKLDFKDR-a4-b3	WT_Tau	WT_Tau	intra-protein xl	321	343	22	3662.88	916.728	4	-1.3	2	31.84
DNIKHVPGGGSVQIVYKPVDLSK-LDLSNVQSKCGSK-a4-b9	WT_Tau	WT_Tau	intra-protein xl	298	290	8	4022.12	1341.72	3	2.1	2	31.84
NVKSKIGSTENLK-K5-156	WT_Tau	-	monolink	259	n/a	-	1572.87	394.225	4	-1.9	1	31.78
CGSKDNIKHVPGGGSVQIVYKPVDLSK-K8-156	WT_Tau	-	monolink	298	n/a	-	3037.59	608.526	5	-0.7	8	31.64
HVPGGGSVQIVYKPVDLSK-CGSKDNIK-a13-b4	WT_Tau	WT_Tau	intra-protein xl	311	294	17	3037.59	608.525	5	-1.2	3	31.59
LDLSNVQSKCGSKDNIK-K13-155	WT_Tau	-	monolink	294	n/a	-	2060.05	687.693	3	-2.1	1	31.31
LDLSNVQSKCGSK-SEKLDFK-a9-b3	WT_Tau	WT_Tau	intra-protein xl	290	343	53	2438.23	610.566	4	-1	1	31.22
VTSKCGSLGNIHHKPGGGQVEVK-SKIGSTENLK-a4-b2	WT_Tau	WT_Tau	intra-protein xl	321	259	62	3601.89	901.48	4	-0.4	2	31.18
CGSLGNIHHKPGGGQVEVK-IGSTENLKHQPGGGK-a10-b8	WT_Tau	WT_Tau	intra-protein xl	331	267	64	3632.84	909.219	4	-0.8	1	31.05
HVPGGGSVQIVYKPVDLSKVTSK-K13-156	WT_Tau	-	monolink	311	n/a	-	2550.4	511.088	5	-1.3	5	30.78
DGSKPPEGSSPPTKPAPPTK-VQSKIGSLDNITHVPGGGNK-a4-b4	reverse_WT_Tau	WT_Tau	intra-protein xl	252	353	101	4132.12	1034.04	4	-4.5	2	30.66
VQSKIGSLDNITHVPGGGNKK-LDFKDR-a4-b4	WT_Tau	WT_Tau	intra-protein xl	353	347	6	3078.64	616.737	5	-0.5	1	30.63
DRVQSKIGSLDNITHVPGGGNK-K6-155	WT_Tau	-	monolink	353	n/a	-	2446.29	612.58	4	-2.7	2	30.49
IGSTENLKHQPGGGK-LDFKDR-a8-b4	WT_Tau	WT_Tau	intra-protein xl	267	347	80	2452.27	614.075	4	-0.9	1	30.3
DRVQSKIGSLDNITHVPGGGNK-K6-156	WT_Tau	-	monolink	353	n/a	-	2447.28	612.827	4	0.1	1	30.28
KLDLSNVQSKCGSK-K14-156	WT_Tau	-	monolink	294	n/a	-	1718.88	573.969	3	-1.8	3	30.05
KLDLSNVQSKCGSK-K1-K10	WT_Tau	-	intralink	281	290	9	1700.88	567.966	3	-1.1	2	29.99
DNIKHVPGGGSVQIVYKPVDLSK-KLDLSNVQSK-a4-b1	WT_Tau	WT_Tau	intra-protein xl	298	281	17	3718.03	744.614	5	-0.1	5	29.97
CGSLGNIHHKPGGGQVEVKSEK-K10-156	WT_Tau	-	monolink	331	n/a	-	2473.24	825.419	3	-1.4	1	29.94
VQSKIGSLDNITHVPGGGNKK-K4-K20	WT_Tau	-	intralink	353	369	16	2286.23	763.085	3	-0.2	8	29.92
LDFKDRVQSK-K4-156	WT_Tau	-	monolink	347	n/a	-	1390.74	464.589	3	-1.9	1	29.68
VTSKCGSLGNIHHKPGGGQVEVK-K14-156	WT_Tau	-	monolink	331	n/a	-	2544.31	637.086	4	-0.3	12	29.44
DNIKHVPGGGSVQIVYKPVDLSK-VQIINKK-a4-b6	WT_Tau	WT_Tau	intra-protein xl	298	280	18	3428.93	686.795	5	-1.3	3	29.2
HVPGGGSVQIVYKPVDLSKVTSK-SEKLDFK-a19-b3	WT_Tau	WT_Tau	intra-protein xl	317	343	26	3397.85	680.578	5	-0.1	1	29.1
SKIGSTENLKHQPGGGK-K10-156	WT_Tau	-	monolink	267	n/a	-	1892.99	632.006	3	-0.8	2	28.65
VQIINKKLDLSNVQSK-K6-156	WT_Tau	-	monolink	280	n/a	-	1982.14	496.543	4	-0.9	2	28.26
VQSKIGSLDNITHVPGGGNK-CGSLGNIHHKPGGGQVEVK-a4-b10	WT_Tau	WT_Tau	intra-protein xl	353	331	22	4131.13	1033.79	4	-0.5	3	28.25
CGSLGNIHHKPGGGQVEVKSEK-VQIINKK-a19-b6	WT_Tau	WT_Tau	intra-protein xl	340	280	60	3296.76	825.199	4	-0.9	1	28.04
CGSLGNIHHKPGGGQVEVKSEK-K10-K19	WT_Tau	-	intralink	331	340	9	2455.23	819.416	3	-0.9	26	27.71
KIETHKLTFR-K1-156	WT_Tau	-	monolink	370	n/a	-	1427.81	476.945	3	-1.3	1	27.45
DNIKHVPGGGSVQIVYKPVDLSK-K4-K23	WT_Tau	-	intralink	298	317	19	2587.4	647.857	4	-0.9	2	26.94
KIETHKLTFR-K1-K6	WT_Tau	-	intralink	370	375	5	1409.8	470.942	3	-1	3	26.91
IGSLDNITHVPGGGNKK-VQIINKK-a16-b6	WT_Tau	WT_Tau	intra-protein xl	369	280	89	2685.51	896.179	3	-1.1	1	26.58
DNIKHVPGGGSVQIVYKPVDLSK-SQVNSLDLKK-a4-b9	WT_Tau	reverse_WT_Tau	intra-protein xl	298	161	137	3718.03	1240.35	3	1	2	25.97
CGSLGNIHHKPGGGQVEVKSEK-IGSTENLKHQPGGGK-a19-b8	WT_Tau	WT_Tau	intra-protein xl	340	267	73	3977.01	995.261	4	-1	1	25.79
CGSLGNIHHKPGGGQVEVKSEK-VQSKIGSLDNITHVPGGGNK-a19-b4	WT_Tau	WT_Tau	intra-protein xl	340	353	13	4475.29	1119.83	4	-1.2	2	25.62
VTSKCGSLGNIHHKPGGGQVEVKSEK-K4-K23	WT_Tau	-	intralink	321	340	19	2870.47	957.83	3	-1.4	4	25.52
VQSKIGSLDNITHVPGGGNK-HQPGGGKVQIINK-a4-b7	WT_Tau	WT_Tau	intra-protein xl	353	274	79	3532.91	1178.64	3	-1.8	2	25.19
HVPGGGSVQIVYKPVDLSK-HQPGGGKVQIINK-a13-b7	WT_Tau	WT_Tau	intra-protein xl	311	274	37	3491.92	699.393	5	-0.4	2	25.13
HVPGGGSVQIVYKPVDLSKVTSK-K13-155	WT_Tau	-	monolink	311	n/a	-	2549.42	638.362	4	-2.7	1	25.12
IGSLDNITHVPGGGNKK-HQPGGGKVQIINK-a16-b7	WT_Tau	WT_Tau	intra-protein xl	369	274	95	3218.75	805.696	4	-0.4	5	25.1
HVPGGGSVQIVYKPVDLSKVTSK-LDFKDR-a19-b4	WT_Tau	WT_Tau	intra-protein xl	317	347	30	3324.81	665.969	5	-0.2	1	24.99
CGSLGNIHHKPGGGQVEVKSEKLDFK-K10-K19	WT_Tau	-	intralink	331	340	9	2958.5	740.632	4	-1.3	2	24.92
CGSLGNIHHKPGGGQVEVKSEK-K22-156	WT_Tau	-	monolink	343	n/a	-	2473.24	825.419	3	-1.4	4	24.9
HQPGGGKVQIINK-KLDLSNVQSK-a7-b1	WT_Tau	WT_Tau	intra-protein xl	274	281	7	2643.47	529.702	5	-0.7	1	24.88
HQPGGGKVQIINK-CGSKDNIK-a7-b4	WT_Tau	WT_Tau	intra-protein xl	274	294	20	2433.28	812.1	3	-1.4	2	24.77
VQIINKKLDLSNVQSK-K7-156	WT_Tau	-	monolink	281	n/a	-	1982.14	661.722	3	0.4	1	24.62
VQSKIGSLDNITHVPGGGNKK-K4-156	WT_Tau	-	monolink	353	n/a	-	2304.24	577.069	4	-0.4	26	24.42
DGSKPPEGSSPPTKPAPPTK-HVPGGGSVQIVYKPVDLSK-a4-b13	reverse_WT_Tau	WT_Tau	intra-protein xl	252	311	59	4091.14	682.865	6	-4	5	24.24
CGSLGNIHHKPGGGQVEVK-HVPGGGSVQIVYKPVDLSK-a10-b13	WT_Tau	WT_Tau	intra-protein xl	331	311	20	4090.14	819.035	5	-1	3	24
CGSLGNIHHKPGGGQVEVKSEKLDFK-K22-156	WT_Tau	-	monolink	343	n/a	-	2976.51	745.135	4	-0.9	1	23.92
VQSKIGSLDNITHVPGGGNK-IGSTENLKHQPGGGK-a4-b8	WT_Tau	WT_Tau	intra-protein xl	353	267	86	3679.93	920.989	4	-0.7	1	23.85
HVPGGGSVQIVYKPVDLSK-SKIGSTENLK-a13-b2	WT_Tau	WT_Tau	intra-protein xl	311	259	52	3192.74	799.192	4	-1.3	3	23.85
CGSLGNIHHKPGGGQVEVKSEKLDFK-K10-156	WT_Tau	-	monolink	331	n/a	-	2976.53	993.183	3	4.8	1	23.82
NIIQVKGGGPQHK-K6-K13	reverse_WT_Tau	-	intralink	168	175	7	1512.84	505.288	3	-1.2	1	23.63
VTSKCGSLGNIHHKPGGGQVEVK-HVPGGGSVQIVYKPVDLSK-a4-b13	WT_Tau	WT_Tau	intra-protein xl	321	311	10	4505.38	902.084	5	-0.9	3	23.53
TPPKSPSSAK-ENAKAK-a4-b4	WT_Tau	WT_Tau	intra-protein xl	234	383	149	1795.97	450	4	0.3	1	23.48
VTSKCGSLGNIHHKPGGGQVEVK-K4-K23	WT_Tau	-	intralink	321	340	19	2526.3	632.583	4	-0.8	14	23.22
VTSKCGSLGNIHHKPGGGQVEVK-LDLSNVQSKCGSK-a4-b9	WT_Tau	WT_Tau	intra-protein xl	321	290	31	3961.01	991.261	4	-1	1	23.04
KLDLSNVQSK-INDKSGCK-a1-b4	WT_Tau	reverse_WT_Tau	intra-protein xl	281	148	133	2189.13	548.291	4	-1.6	1	22.84
CGSLGNIHHKPGGGQVEVK-IGSLDNITHVPGGGNKK-a10-b16	WT_Tau	WT_Tau	intra-protein xl	331	369	38	3816.97	955.249	4	-0.8	2	22.7
VTSKCGSLGNIHHKPGGGQVEVK-KLDLSNVQSK-a4-b1	WT_Tau	WT_Tau	intra-protein xl	321	281	40	3656.92	915.239	4	-1.8	1	22.59
SKIGSTENLKHQPGGGK-K2-K10	WT_Tau	-	intralink	259	267	8	1874.98	626.002	3	-1.4	2	22.54
DNIKHVPGGGSVQIVYKPVDLSK-K4-K17	WT_Tau	-	intralink	298	311	13	2587.4	863.474	3	-0.7	13	22.46
CGSLGNIHHKPGGGQVEVK-SEKLDFKDR-a10-b7	WT_Tau	WT_Tau	intra-protein xl	331	347	16	3247.64	650.535	5	-0.9	1	22.24
DNIKHVPGGGSVQIVYKPVDLSK-SKIGSTENLK-a4-b2	WT_Tau	WT_Tau	intra-protein xl	298	259	39	3662.98	916.754	4	-1.2	1	22.19
HVPGGGSVQIVYKPVDLSKVTSK-K23-156	WT_Tau	-	monolink	321	n/a	-	2550.4	851.142	3	-1.2	7	21.77
DKFDLK-MVSKSK-a2-b4	reverse_WT_Tau	WT_Tau	intra-protein xl	95	130	35	1580.85	527.959	3	3.6	1	21.75
VTSKCGSLGNIHHKPGGGQVEVK-VQSKIGSLDNITHVPGGGNK-a4-b4	WT_Tau	WT_Tau	intra-protein xl	321	353	32	4546.37	1137.6	4	0.7	2	21.56
HVPGGGSVQIVYKPVDLSKVTSK-DGSKPPEGSSPPTKPAPPTK-a19-b4	WT_Tau	reverse_WT_Tau	intra-protein xl	317	252	65	4506.38	752.072	6	-3.8	4	21.25
HVPGGGSVQIVYKPVDLSKVTSKCGSLGNIHHKPGGGQVEVK-K19-K42	WT_Tau	-	intralink	317	340	23	4487.37	748.903	6	-0.7	1	21.22
GDAGKAK-GDAGKAK-a5-b5	reverse_WT_Tau	reverse_WT_Tau	intra-protein xl	299	299	0	1428.76	477.262	3	3	2	20.87
HVPGGGSVQIVYKPVDLSK-SEKLDFKDR-a13-b7	WT_Tau	WT_Tau	intra-protein xl	311	347	36	3253.73	814.44	4	-1.9	1	20.73
DNIKHVPGGGSVQIVYKPVDLSKVTSK-K4-K23	WT_Tau	-	intralink	298	317	19	3002.64	751.669	4	-0.4	4	20.29
VQSKIGSLDNITHVPGGGNK-LDLSNVQSKCGSK-a4-b9	WT_Tau	WT_Tau	intra-protein xl	353	290	63	3592.85	899.221	4	-0.2	1	20.27
CGSLGNIHHKPGGGQVEVK-KLDLSNVQSKCGSK-a10-b10	WT_Tau	WT_Tau	intra-protein xl	331	290	41	3673.86	919.474	4	-0.8	1	20.18
SEKLDFKDR-K7-156	WT_Tau	-	monolink	347	n/a	-	1292.66	431.894	3	-1.5	3	19.83
VQSKIGSLDNITHVPGGGNK-SEKLDFKDR-a4-b7	WT_Tau	WT_Tau	intra-protein xl	353	347	6	3294.72	1099.25	3	-0.7	1	19.33
DGSKPPEGSSPPTKPAPPTK-IGSLDNITHVPGGGNKK-a4-b16	reverse_WT_Tau	WT_Tau	intra-protein xl	252	369	117	3817.97	955.5	4	-4.2	3	19.27
HQPGGGKVQIINK-K7-K13	WT_Tau	-	intralink	274	280	6	1512.84	505.288	3	0	1	19.07
VQSKIGSLDNITHVPGGGNK-HVPGGGSVQIVYKPVDLSK-a4-b13	WT_Tau	WT_Tau	intra-protein xl	353	311	42	4137.22	828.451	5	-1.8	4	19.05
CGSKDNIKHVPGGGSVQIVYKPVDLSK-K4-156	WT_Tau	-	monolink	294	n/a	-	3037.59	760.406	4	0.1	6	18.9
KLDLSNVQSKCGSK-NVKSKIGSTENLK-a10-b5	WT_Tau	WT_Tau	intra-protein xl	290	259	31	3117.66	780.423	4	-2.8	13	18.25
GDAGKAKK-GDAGKAKK-a5-b7	reverse_WT_Tau	reverse_WT_Tau	intra-protein xl	299	301	2	1684.95	422.245	4	0.8	1	17.97
HVPGGGSVQIVYKPVDLSKVTSK-DGSKPPEGSSPPTKPAPPTK-a13-b4	WT_Tau	reverse_WT_Tau	intra-protein xl	311	252	59	4506.39	902.285	5	-3	3	17.55
SQVNSLDLKK-INDKSGCK-a9-b4	reverse_WT_Tau	reverse_WT_Tau	intra-protein xl	161	148	13	2189.13	438.834	5	-1.7	6	17.54
IGSLDNITHVPGGGNKK-SQVNSLDLKK-a16-b9	WT_Tau	reverse_WT_Tau	intra-protein xl	369	161	208	2974.61	595.929	5	-0.5	1	17.53
HVPGGGSVQIVYKPVDLSKVTSK-K13-K23	WT_Tau	-	intralink	311	321	10	2532.39	845.138	3	-1.8	7	16.87
IGSTENLKHQPGGGK-K8-K15	WT_Tau	-	intralink	267	274	7	1659.86	554.295	3	1.6	2	16.85
GGGPQHKLNETSGIK-K7-K15	reverse_WT_Tau	-	intralink	175	183	8	1659.86	554.293	3	-0.9	4	16.46
LDPXPVPATQLRSKASSPSKPPTR-ESKVEVQGGGPK-a14-b3	reverse_WT_Tau	reverse_WT_Tau	intra-protein xl	202	102	100	3928.07	983.026	4	0	1	16.41
HVPGGGSVQIVYKPVDLSK-K19-156	WT_Tau	-	monolink	317	n/a	-	2135.16	712.728	3	-0.4	14	16.33
HVPGGGSVQIVYKPVDLSKVTSKCGSLGNIHHKPGGGQVEVK-K13-K42	WT_Tau	-	intralink	311	340	29	4487.37	898.482	5	-0.5	1	16.27
GDAGKAKK-GDAGKAK-a5-b5	reverse_WT_Tau	reverse_WT_Tau	intra-protein xl	299	299	0	1556.85	390.221	4	1	1	16.16
HVPGGGSVQIVYKPVDLSKVTSK-KLDLSNVQSK-a19-b1	WT_Tau	WT_Tau	intra-protein xl	317	281	36	3663.02	1222.02	3	-1.2	10	15.93
VTSKCGSLGNIHHKPGGGQVEVKSEK-K4-156	WT_Tau	-	monolink	321	n/a	-	2888.48	963.835	3	-0.3	2	15.91
LQTAPVPMPDLKNVK-SKSVXR-a12-b2	WT_Tau	reverse_WT_Tau	intra-protein xl	254	312	58	2510.36	628.598	4	-0.1	1	15.59
DGSKPPEGSSPPTKPAPPTK-IGSTENLKHQPGGGK-a4-b8	reverse_WT_Tau	WT_Tau	intra-protein xl	252	267	15	3633.85	909.47	4	-3.9	2	15.55
CGSLGNIHHKPGGGQVEVKSEKLDFK-K10-K22	WT_Tau	-	intralink	331	343	12	2958.5	740.633	4	-0.7	1	15.27
VTSKCGSLGNIHHKPGGGQVEVKSEK-K14-156	WT_Tau	-	monolink	331	n/a	-	2888.48	578.703	5	-1.2	4	15.25
IGSLDNITHVPGGGNKKIETHK-K17-156	WT_Tau	-	monolink	370	n/a	-	2470.31	495.071	5	-1.4	3	15.19
VQSKIGSLDNITHVPGGGNK-SQVNSLDLKK-a4-b9	WT_Tau	reverse_WT_Tau	intra-protein xl	353	161	192	3288.77	1097.26	3	-0.6	1	15.14
HVPGGGSVQIVYKPVDLSKVTSK-DGSKPPEGSSPPTKPAPPTK-a13-b14	WT_Tau	reverse_WT_Tau	intra-protein xl	311	262	49	4506.39	1127.61	4	-1.7	2	14.9
LDLSNVQSKCGSK-STVKSLDVPK-a9-b4	WT_Tau	reverse_WT_Tau	intra-protein xl	290	125	165	2645.41	882.809	3	3.8	1	14.9
SGCKSQVNSLDLK-KNIIQVK-a4-b1	reverse_WT_Tau	reverse_WT_Tau	intra-protein xl	152	162	10	2414.33	604.59	4	2.9	1	14.84
VEVQGGGPKHHINGLSGCKSTVK-K19-156	reverse_WT_Tau	-	monolink	121	n/a	-	2544.31	509.869	5	-1.5	2	14.77
HVPGGGSVQIVYKPVDLSKVTSK-DGSKPPEGSSPPTKPAPPTK-a19-b14	WT_Tau	reverse_WT_Tau	intra-protein xl	317	262	55	4506.39	902.285	5	-3	4	14.75
HVPGGGSVQIVYKPVDLSK-IGSLDNITHVPGGGNKK-a13-b16	WT_Tau	WT_Tau	intra-protein xl	311	369	58	3823.07	956.774	4	0.8	1	14.4
YVIEAGHDTKAK-MVSKSK-a10-b4	reverse_WT_Tau	WT_Tau	intra-protein xl	57	130	73	2147.12	537.789	4	-2.8	2	14.14
DGSKPPEGSSPPTKPAPPTK-HVPGGGSVQIVYKPVDLSK-a14-b13	reverse_WT_Tau	WT_Tau	intra-protein xl	262	311	49	4091.14	819.236	5	-3.6	3	13.97
SKIGSTENLKHQPGGGK-K2-K17	WT_Tau	-	intralink	259	274	15	1874.98	626.002	3	-1.8	3	13.83
AKANERFTLK-TKGDAGKAK-a2-b2	reverse_WT_Tau	reverse_WT_Tau	intra-protein xl	59	294	235	2189.21	730.746	3	-1.3	1	13.67
DGSKPPEGSSPPTKPAPPTKAPIR-DKFDLKESK-a4-b6	reverse_WT_Tau	reverse_WT_Tau	intra-protein xl	252	99	153	3657.93	732.594	5	1.3	2	13.62
HVPGGGSVQIVYKPVDLSK-KLDLSNVQSKCGSK-a13-b1	WT_Tau	WT_Tau	intra-protein xl	311	281	30	3679.96	920.997	4	-0.9	1	13.57
IGSTENLKHQPGGGK-SQVNSLDLKK-a8-b9	WT_Tau	reverse_WT_Tau	intra-protein xl	267	161	106	2790.49	559.105	5	-0.6	3	13.54
HQPGGGKVQIINK-SQVNSLDLKK-a7-b9	WT_Tau	reverse_WT_Tau	intra-protein xl	274	161	113	2643.47	661.875	4	-1.2	2	13.5
IATPRGAAPPGQKGQANATR-ESKVEVQGGGPK-a13-b3	WT_Tau	reverse_WT_Tau	intra-protein xl	163	102	61	3312.77	829.2	4	4.6	2	13.5
TANAQGKQGPPAAGRPTAIKTK-LDFKDRVQSK-a7-b4	reverse_WT_Tau	WT_Tau	intra-protein xl	279	347	68	3534.92	707.992	5	-1.4	1	13.23
VQSKIGSLDNITHVPGGGNKK-AKANERFTLK-a20-b2	WT_Tau	reverse_WT_Tau	intra-protein xl	369	59	310	3462.89	866.731	4	-1	1	13.12
SGCKSQVNSLDLKK-K13-156	reverse_WT_Tau	-	monolink	161	n/a	-	1718.89	573.97	3	0.1	1	13.08
SEKLDFKDR-K7-155	WT_Tau	-	monolink	347	n/a	-	1291.67	431.566	3	-3.1	1	13.07
VTSKCGSLGNIHHKPGGGQVEVK-SQVNSLDLKK-a4-b9	WT_Tau	reverse_WT_Tau	intra-protein xl	321	161	160	3656.93	915.24	4	-0.6	3	13.03
KNIIQVKGGGPQHK-K1-K7	reverse_WT_Tau	-	intralink	162	168	6	1640.94	547.986	3	-0.4	1	12.88
KNGGGPVHTINDLSGIK-K17-155	reverse_WT_Tau	-	monolink	89	n/a	-	1861	621.342	3	-2.5	2	12.85
KNIIQVKGGGPQHK-K7-K14	reverse_WT_Tau	-	intralink	168	175	7	1640.94	547.986	3	-0.4	1	12.73
SKVNKLDPXPVPATQLR-ENAKAKTDHGAEIVYK-a2-b6	reverse_WT_Tau	WT_Tau	intra-protein xl	185	385	200	3820.01	956.011	4	-1.9	1	12.7
SKIGSTENLKHQPGGGK-TPPKSPSSAKSR-a2-b10	WT_Tau	WT_Tau	intra-protein xl	259	240	19	3116.66	624.34	5	1.4	3	12.56
KLDLSNVQSKCGSK-K1-K14	WT_Tau	-	intralink	281	294	13	1700.88	567.966	3	-1.1	2	12.42
TDHGAEIVYKSPVVSGDTSPR-LTFRENAKAK-a10-b8	WT_Tau	WT_Tau	intra-protein xl	395	383	12	3528.83	589.146	6	2.6	1	12.35
NVKSKIGSTENLK-SKSVXR-a5-b2	WT_Tau	reverse_WT_Tau	intra-protein xl	259	312	53	2277.23	456.454	5	-3.1	1	12.23
LDLSNVQSKCGSK-IPAKTPPAPK-a9-b4	WT_Tau	WT_Tau	intra-protein xl	290	174	116	2591.39	648.855	4	-3.7	1	12.2
DNIKHVPGGGSVQIVYKPVDLSKVTSK-K4-K27	WT_Tau	-	intralink	298	321	23	3002.64	751.669	4	0	1	12.16
HVPGGGSVQIVYKPVDLSK-K19-155	WT_Tau	-	monolink	317	n/a	-	2134.17	712.399	3	-2.8	13	12.09
HLSNVSSTGSIDMVDSPQLATLADEVSASLAKQGL-VVAVKKPER-a32-b5	WT_Tau	reverse_WT_Tau	intra-protein xl	438	217	221	4703.47	941.702	5	0.3	1	11.99
HVPGGGSVQIVYKPVDLSK-SEKLDFKDR-a13-b3	WT_Tau	WT_Tau	intra-protein xl	311	343	32	3253.73	1085.59	3	-0.7	1	11.98
GGGPQHKLNETSGIKSK-LNETSGIKSK-a15-b8	reverse_WT_Tau	reverse_WT_Tau	intra-protein xl	183	183	0	2950.59	738.654	4	4.3	1	11.96
SQVNSLDLKK-CGSKDNIK-a9-b4	reverse_WT_Tau	WT_Tau	intra-protein xl	161	294	133	2189.14	730.72	3	-0.3	1	11.85
GGGPQHKLNETSGIKSK-LNETSGIKSK-a7-b8	reverse_WT_Tau	reverse_WT_Tau	intra-protein xl	175	183	8	2950.57	591.123	5	0.4	1	11.84
HVPGGGSVQIVYKPVDLSK-IGSTENLKHQPGGGK-a13-b8	WT_Tau	WT_Tau	intra-protein xl	311	267	44	3638.94	1213.99	3	-0.3	2	11.8
AKKDDSGTGDK-IPAKTPPAPK-a3-b4	reverse_WT_Tau	WT_Tau	intra-protein xl	302	174	128	2277.23	570.316	4	4.2	1	11.51
VEVQGGGPKHHINGLSGCK-K9-K19	reverse_WT_Tau	-	intralink	111	121	10	2111.06	528.772	4	-1.2	35	11.49
CGSLGNIHHKPGGGQVEVK-K10-K19	WT_Tau	-	intralink	331	340	9	2111.06	528.772	4	-0.9	23	11.42
VEVQGGGPKHHINGLSGCKSTVK-K9-156	reverse_WT_Tau	-	monolink	111	n/a	-	2544.31	849.111	3	-1.2	3	11.27
SGCKSQVNSLDLKK-TPPKSPSSAK-a13-b4	reverse_WT_Tau	WT_Tau	intra-protein xl	161	234	73	2699.41	540.889	5	-4	1	11.21
IGSLDNITHVPGGGNKKIETHK-LQTAPVPMPDLKNVKSK-a16-b12	WT_Tau	WT_Tau	intra-protein xl	369	254	115	4317.37	1080.35	4	3.9	1	11.16
DGSKPPEGSSPPTKPAPPTK-SEKLDFKDR-a4-b3	reverse_WT_Tau	WT_Tau	intra-protein xl	252	343	91	3248.64	813.168	4	-5	2	11.13
HVPGGGSVQIVYKPVDLSKVTSK-K23-155	WT_Tau	-	monolink	321	n/a	-	2549.42	638.362	4	-2.7	1	11.12
TPPKSPSSAKSR-HTEIKK-a4-b5	WT_Tau	reverse_WT_Tau	intra-protein xl	234	72	162	2134.18	712.4	3	0.8	3	11.07
IPAKTPPAPKTPPSSGEPPK-K4-K20	WT_Tau	-	intralink	174	190	16	2134.17	712.399	3	3.2	14	10.95
DGSKPPEGSSPPTKPAPPTKAPIR-DKFDLKESK-a4-b2	reverse_WT_Tau	reverse_WT_Tau	intra-protein xl	252	95	157	3657.93	610.663	6	1.4	1	10.95
YVIEAGHDTKAK-KNIIQVK-a10-b1	reverse_WT_Tau	reverse_WT_Tau	intra-protein xl	57	162	105	2310.29	771.105	3	-0.9	1	10.71
TPPKSPSSAKSR-KIETHK-a4-b1	WT_Tau	WT_Tau	intra-protein xl	234	370	136	2134.18	712.401	3	1.6	7	10.68
ENAKAKTDHGAEIVYK-TKGDAGK-a6-b2	WT_Tau	reverse_WT_Tau	intra-protein xl	385	294	91	2586.32	863.114	3	-3.7	1	10.67
FDLKESKVEVQGGGPK-ASSPSKPPTR-a7-b6	reverse_WT_Tau	reverse_WT_Tau	intra-protein xl	102	208	106	2881.53	721.39	4	3	1	10.64
DNIKHVPGGGSVQIVYKPVDLSK-TKGDAGKAK-a4-b7	WT_Tau	reverse_WT_Tau	intra-protein xl	298	299	1	3461.89	866.479	4	-0.7	1	10.6
IPAKTPPAPKTPPSSGEPPK-K4-K10	WT_Tau	-	intralink	174	180	6	2134.17	712.399	3	3.2	2	10.59
APIRTANAQGKQGPPAAGRPTAIK-LQTAPVPXPDLKNVKSK-a11-b12	reverse_WT_Tau	WT_Tau	intra-protein xl	279	254	25	4389.43	878.894	5	-0.7	2	10.58
AKKDDSGTGDK-LTFRENAKAK-a2-b8	reverse_WT_Tau	WT_Tau	intra-protein xl	301	383	82	2435.27	812.765	3	2.7	1	10.57
LQTAPVPXPDLKNVK-NVKSKIGSTENLK-a12-b3	WT_Tau	WT_Tau	intra-protein xl	254	257	3	3220.78	1074.6	3	2.7	2	10.48
HHINGLSGCKSTVK-DKFDLKESK-a10-b2	reverse_WT_Tau	reverse_WT_Tau	intra-protein xl	121	95	26	2783.44	696.868	4	4.5	1	10.41
VTSKCGSLGNIHHKPGGGQVEVK-KVAVVR-a14-b1	WT_Tau	WT_Tau	intra-protein xl	331	225	106	3196.76	640.361	5	4.7	1	10.28
CGSKDNIKHVPGGGSVQIVYKPVDLSK-ESKVEVQGGGPK-a4-b3	WT_Tau	reverse_WT_Tau	intra-protein xl	294	102	192	4233.21	1059.31	4	-0.3	1	10.28
GGGPQHKLNETSGIKSK-YVIQVSGGGPVHKINDK-a15-b13	reverse_WT_Tau	reverse_WT_Tau	intra-protein xl	183	144	39	3684.96	922.248	4	0.8	1	10.24
TPPKSPSSAKSR-HTEIKK-a10-b5	WT_Tau	reverse_WT_Tau	intra-protein xl	240	72	168	2134.17	712.399	3	-0.2	3	10.18
IGSLDNITHVPGGGNKKIETHK-K16-156	WT_Tau	-	monolink	369	n/a	-	2470.32	824.446	3	-1	1	10.17
HHINGLSGCKSTVK-ESKVEVQGGGPK-a10-b3	reverse_WT_Tau	reverse_WT_Tau	intra-protein xl	121	102	19	2888.48	963.835	3	-0.3	1	10.17
ASSPSKPPTRVVAVK-ANERFTLKHTEIK-a6-b8	reverse_WT_Tau	reverse_WT_Tau	intra-protein xl	208	67	141	3246.8	650.367	5	-3.9	1	10.17
SKIGSTENLKHQPGGGK-XVSKSK-a2-b4	WT_Tau	WT_Tau	intra-protein xl	259	130	129	2569.34	643.343	4	-4.8	1	10.13
SKIGSTENLKHQPGGGK-LNETSGIKSK-a2-b8	WT_Tau	reverse_WT_Tau	intra-protein xl	259	183	76	2950.59	591.125	5	4.3	2	10.09
GGGPQHKLNETSGIK-FDLKESK-a7-b4	reverse_WT_Tau	reverse_WT_Tau	intra-protein xl	175	99	76	2525.31	632.336	4	0.5	1	9.97
VQSKIGSLDNITHVPGGGNK-LNETSGIKSK-a4-b8	WT_Tau	reverse_WT_Tau	intra-protein xl	353	183	170	3233.74	809.442	4	3.1	1	9.94
TPPAPKTPPSSGEPPKSGDR-QGPPAAGRPTAIKTK-a16-b13	WT_Tau	reverse_WT_Tau	intra-protein xl	190	292	102	3631.93	1211.65	3	0	14	9.88
SKASSPSKPPTR-KIETHK-a8-b1	reverse_WT_Tau	WT_Tau	intra-protein xl	208	370	162	2134.18	712.401	3	2	5	9.86
GGGPQHKLNETSGIKSK-SKASSPSKPPTR-a7-b8	reverse_WT_Tau	reverse_WT_Tau	intra-protein xl	175	208	33	3116.66	624.34	5	1.4	1	9.86
CGSLGNIHHKPGGGQVEVKSEK-K19-K22	WT_Tau	-	intralink	340	343	3	2455.23	819.417	3	-0.7	1	9.73
SLDVPKYVIQVSGGGPVHK-K6-156	reverse_WT_Tau	-	monolink	131	n/a	-	2135.16	712.729	3	0.2	15	9.68
TPPKSPSSAKSR-AKKDDSGTGDK-a10-b3	WT_Tau	reverse_WT_Tau	intra-protein xl	240	302	62	2500.28	834.435	3	1.3	1	9.62
KLDLSNVQSKCGSK-TPPKSPSSAK-a10-b4	WT_Tau	WT_Tau	intra-protein xl	290	234	56	2699.41	540.889	5	-4	1	9.6
KLDLSNVQSKCGSK-NVKSKIGSTENLK-a10-b3	WT_Tau	WT_Tau	intra-protein xl	290	257	33	3117.66	1040.23	3	-2.7	5	9.55
GGGPQHKLNETSGIKSK-SQVNSLDLKK-a7-b9	reverse_WT_Tau	reverse_WT_Tau	intra-protein xl	175	161	14	3005.61	752.411	4	-0.8	1	9.42
DNIKHVPGGGSVQIVYKPVDLSKVTSK-K23-156	WT_Tau	-	monolink	317	n/a	-	3020.65	756.171	4	-0.7	1	9.33
FDLKESKVEVQGGGPK-K4-K7	reverse_WT_Tau	-	intralink	99	102	3	1854.97	619.332	3	-0.8	1	9.3
STVKSLDVPK-KIETHK-a4-b1	reverse_WT_Tau	WT_Tau	intra-protein xl	125	370	245	1965.12	656.046	3	0.6	3	9.27
INDKSGCK-TKIATPR-a4-b2	reverse_WT_Tau	WT_Tau	intra-protein xl	148	150	2	1843.98	615.667	3	-2.5	2	9.24
LTFRENAKAK-KIETHK-a8-b1	WT_Tau	WT_Tau	intra-protein xl	383	370	13	2069.16	690.727	3	-2.4	1	9.12
YVIQVSGGGPVHKINDKSGCK-ESKVEVQGGGPK-a13-b3	reverse_WT_Tau	reverse_WT_Tau	intra-protein xl	144	102	42	3593.85	899.471	4	0.3	1	9.05
SKASSPSKPPTR-DGTGSDDKKAK-a2-b9	reverse_WT_Tau	WT_Tau	intra-protein xl	202	141	61	2500.27	834.433	3	-1.1	1	9.01
TPPAPKTPPSSGEPPKSGDR-KAKGADGK-a16-b1	WT_Tau	WT_Tau	intra-protein xl	190	141	49	2913.52	972.181	3	-0.2	1	8.73
GAAPPGQKGQANATRIPAK-SKASSPSKPPTR-a8-b2	WT_Tau	reverse_WT_Tau	intra-protein xl	163	202	39	3211.75	1071.59	3	3.4	1	8.63
GGGPQHKLNETSGIKSK-SKASSPSKPPTR-a15-b2	reverse_WT_Tau	reverse_WT_Tau	intra-protein xl	183	202	19	3116.66	780.173	4	0.4	1	8.6
SKASSPSKPPTR-HTEIKK-a8-b5	reverse_WT_Tau	reverse_WT_Tau	intra-protein xl	208	72	136	2134.18	712.4	3	0.4	1	8.51
SLDVPKYVIQVSGGGPVHK-K6-155	reverse_WT_Tau	-	monolink	131	n/a	-	2134.17	712.399	3	-3.4	7	8.48
KNGGGPVHTINDLSGIKSQVR-IPAKTPPAPK-a1-b4	reverse_WT_Tau	WT_Tau	intra-protein xl	73	174	101	3332.86	834.223	4	0.7	1	8.39
SKASSPSKPPTR-HTEIKK-a2-b5	reverse_WT_Tau	reverse_WT_Tau	intra-protein xl	202	72	130	2134.17	712.399	3	-0.2	5	8.38
GADGKTKIATPR-SKDGTGSDDKK-a7-b2	WT_Tau	WT_Tau	intra-protein xl	150	132	18	2488.27	830.431	3	-2.6	1	8.38
HVPGGGSVQIVYKPVDLSKVTSK-SPSSAKSRLQTAPVPXPDLK-a19-b6	WT_Tau	WT_Tau	intra-protein xl	317	240	77	4657.53	932.514	5	3	1	8.31
LQTAPVPXPDLKNVK-DKFDLKESK-a12-b2	WT_Tau	reverse_WT_Tau	intra-protein xl	254	95	159	2912.57	971.865	3	4.8	2	8.22
VTSKCGSLGNIHHKPGGGQVEVK-SPSSAKSR-a14-b6	WT_Tau	WT_Tau	intra-protein xl	331	240	91	3344.72	1115.92	3	-0.3	1	8.19
LQTAPVPXPDLKNVK-NVKSKIGSTENLK-a12-b5	WT_Tau	WT_Tau	intra-protein xl	254	259	5	3220.79	1074.6	3	3.7	2	8.16
ASSPSKPPTRVVAVK-IETHKLTFRENAK-a6-b5	reverse_WT_Tau	WT_Tau	intra-protein xl	208	375	167	3246.82	650.371	5	2.1	3	8.04
HVPGGGSVQIVYKPVDLSK-GGGPQHKLNETSGIK-a13-b7	WT_Tau	reverse_WT_Tau	intra-protein xl	311	175	136	3638.94	910.743	4	-0.8	1	8.04
GGGPQHKLNETSGIK-GGGPQHKLNETSGIK-a7-b7	reverse_WT_Tau	reverse_WT_Tau	intra-protein xl	175	175	0	3181.65	1061.56	3	0.8	1	8.02
DGSKPPEGSSPPTKPAPPTK-K4-155	reverse_WT_Tau	-	monolink	252	n/a	-	2129.1	533.283	4	-1.2	1	7.97
INDKSGCKSQVNSLDLK-LNETSGIKSKVNK-a4-b10	reverse_WT_Tau	reverse_WT_Tau	intra-protein xl	148	185	37	3459.81	865.96	4	-4.1	1	7.95
CGSLGNIHHKPGGGQVEVKSEK-SKIGSTENLK-a10-b2	WT_Tau	WT_Tau	intra-protein xl	331	259	72	3530.82	883.714	4	2.9	2	7.95
ASSPSKPPTRVVAVKKPER-VNKLDPXPVPATQLR-a16-b3	reverse_WT_Tau	reverse_WT_Tau	intra-protein xl	218	188	30	3865.16	1289.39	3	-1.6	1	7.91
NGGGPVHTINDLSGIKSQVR-K16-155	reverse_WT_Tau	-	monolink	89	n/a	-	2203.16	551.799	4	-4.1	2	7.9
VEVQGGGPKHHINGLSGCKSTVK-HVPGGGSVQIVYKPVDLSK-a9-b13	reverse_WT_Tau	WT_Tau	intra-protein xl	111	311	200	4505.38	902.084	5	-0.9	1	7.86
VVAVKKPERTPPTPLSPTR-ENAKAKTDHGAEIVYK-a5-b4	reverse_WT_Tau	WT_Tau	intra-protein xl	217	383	166	3983.17	996.8	4	-3.5	1	7.86
GADGKTKIATPR-XVSKSK-a7-b4	WT_Tau	WT_Tau	intra-protein xl	150	130	20	2046.12	683.049	3	4.8	1	7.82
SRLQTAPVPMPDLKNVK-SQVNSLDLKK-a14-b9	WT_Tau	reverse_WT_Tau	intra-protein xl	254	161	93	3161.74	791.443	4	-2.2	2	7.79
SKVNKLDPMPVPATQLR-KLDLSNVQSK-a5-b1	reverse_WT_Tau	WT_Tau	intra-protein xl	188	281	93	3161.74	633.356	5	-3	1	7.74
HVPGGGSVQIVYKPVDLSKVTSK-SKIGSTENLK-a19-b2	WT_Tau	WT_Tau	intra-protein xl	317	259	58	3607.98	903.003	4	0	1	7.72
IPAKTPPAPKTPPSSGEPPK-K10-K20	WT_Tau	-	intralink	180	190	10	2134.18	712.4	3	4.3	11	7.67
SKIGSTENLKHQPGGGK-SKASSPSKPPTR-a2-b2	WT_Tau	reverse_WT_Tau	intra-protein xl	259	202	57	3116.66	1039.89	3	0.5	5	7.48
SGCKSQVNSLDLK-IPAKTPPAPK-a4-b4	reverse_WT_Tau	WT_Tau	intra-protein xl	152	174	22	2591.39	648.855	4	-3.7	3	7.47
YVIQVSGGGPVHKINDK-KIETHKLTFR-a13-b1	reverse_WT_Tau	WT_Tau	intra-protein xl	144	370	226	3219.77	1074.27	3	-1.3	7	7.34
SKASSPSKPPTR-KIETHK-a2-b1	reverse_WT_Tau	WT_Tau	intra-protein xl	202	370	168	2134.18	712.4	3	1.1	4	7.25
LNETSGIKSKVNK-KLDLSNVQSK-a10-b1	reverse_WT_Tau	WT_Tau	intra-protein xl	185	281	96	2685.48	896.169	3	-3.3	1	7.19
TDHGAEIVYKSPVVSGDTSPR-VQIINKKLDLSNVQSK-a10-b6	WT_Tau	WT_Tau	intra-protein xl	395	280	115	4178.21	836.65	5	-3.1	1	7.12
LGADTDGEQDQHXTYGGQDKRDGLGYTGAHDEMVEFEQRPEAM-VNKLDPMPVPATQLR-a20-b3	reverse_WT_Tau	reverse_WT_Tau	intra-protein xl	418	188	230	6616.06	1324.22	5	4.1	1	7.12
FTLKHTEIKK-AKANER-a9-b2	reverse_WT_Tau	reverse_WT_Tau	intra-protein xl	72	59	13	2069.17	690.731	3	3.4	1	7.06
KPERTPPTPLSPTRSR-SKDGTGSDDKK-a1-b10	reverse_WT_Tau	WT_Tau	intra-protein xl	218	140	78	3093.62	1032.21	3	4.2	5	7.04
TANAQGKQGPPAAGRPTAIKTK-KLDLSNVQSKCGSK-a7-b10	reverse_WT_Tau	WT_Tau	intra-protein xl	279	290	11	3863.05	966.77	4	-4.8	1	7.03
SKASSPSKPPTR-KLDLSNVQSK-a2-b1	reverse_WT_Tau	WT_Tau	intra-protein xl	202	281	79	2510.38	837.8	3	2.5	2	7
VQSKIGSLDNITHVPGGGNKK-K21-156	WT_Tau	-	monolink	370	n/a	-	2304.24	769.089	3	0.1	1	6.98
AKTDHGAEIVYKSPVVSGDTSPR-IPAKTPPAPKTPPSSGEPPK-a2-b4	WT_Tau	WT_Tau	intra-protein xl	385	174	211	4547.38	1137.85	4	-2.9	2	6.97
VTSKCGSLGNIHHKPGGGQVEVKSEK-K23-156	WT_Tau	-	monolink	340	n/a	-	2888.48	723.127	4	-1.1	1	6.91
FDLKESKVEVQGGGPK-ASSPSKPPTR-a4-b6	reverse_WT_Tau	reverse_WT_Tau	intra-protein xl	99	208	109	2881.53	961.518	3	3.9	2	6.81
GAAPPGQKGQANATR-STVKSLDVPK-a8-b4	WT_Tau	reverse_WT_Tau	intra-protein xl	163	125	38	2633.41	878.809	3	-3.3	1	6.77
IGSLDNITHVPGGGNKKIETHK-LQTAPVPMPDLKNVKSK-a16-b15	WT_Tau	WT_Tau	intra-protein xl	369	257	112	4317.37	1080.35	4	4.6	1	6.71
TPPAPKTPPSSGEPPKSGDR-QGPPAAGRPTAIKTK-a6-b13	WT_Tau	reverse_WT_Tau	intra-protein xl	180	292	112	3631.93	1211.65	3	-0.6	1	6.68
FDLKESKVEVQGGGPK-LDLSNVQSKCGSK-a4-b9	reverse_WT_Tau	WT_Tau	intra-protein xl	99	290	191	3289.67	823.426	4	-4.4	1	6.66
IGSLDNITHVPGGGNKKIETHK-K17-K22	WT_Tau	-	intralink	370	375	5	2452.31	614.086	4	2.5	1	6.61
VQSKIGSLDNITHVPGGGNK-ASSPSKPPTR-a4-b6	WT_Tau	reverse_WT_Tau	intra-protein xl	353	208	145	3184.67	637.942	5	-4	1	6.61
VQSKIGSLDNITHVPGGGNKK-K20-156	WT_Tau	-	monolink	369	n/a	-	2304.24	577.068	4	-0.9	1	6.58
TPPAPKTPPSSGEPPK-QGPPAAGRPTAIKTK-a6-b13	WT_Tau	reverse_WT_Tau	intra-protein xl	180	292	112	3216.76	1073.26	3	3.9	1	6.54
CGSKDNIKHVPGGGSVQIVYKPVDLSK-KLDLSNVQSK-a8-b1	WT_Tau	WT_Tau	intra-protein xl	298	281	17	4150.22	1038.56	4	1.4	2	6.5
TDHGAEIVYKSPVVSGDTSPR-YVIQVSGGGPVHKINDK-a10-b13	WT_Tau	reverse_WT_Tau	intra-protein xl	395	144	251	4162.13	1041.54	4	-0.1	1	6.46
ESKVEVQGGGPKHHINGLSGCK-K3-156	reverse_WT_Tau	-	monolink	102	n/a	-	2473.23	619.316	4	-2.4	1	6.45
AKTDHGAEIVYKSPVVSGDTSPR-SGCKSQVNSLDLKK-a2-b13	WT_Tau	reverse_WT_Tau	intra-protein xl	385	161	224	4114.1	686.691	6	-0.1	1	6.45
SKVNKLDPXPVPATQLR-KIETHKLTFR-a2-b1	reverse_WT_Tau	WT_Tau	intra-protein xl	185	370	185	3318.86	830.724	4	4.7	1	6.3
YVIQVSGGGPVHKINDK-K13-156	reverse_WT_Tau	-	monolink	144	n/a	-	1966.05	656.358	3	-0.3	2	6.28
YVIQVSGGGPVHKINDK-KIETHKLTFR-a13-b6	reverse_WT_Tau	WT_Tau	intra-protein xl	144	375	231	3219.77	1074.27	3	-0.8	3	6.28
SLDVPKYVIQVSGGGPVHK-K19-155	reverse_WT_Tau	-	monolink	144	n/a	-	2134.18	712.4	3	-1.7	4	6.28
IGSLDNITHVPGGGNKKIETHK-LQTAPVPMPDLKNVKSK-a17-b12	WT_Tau	WT_Tau	intra-protein xl	370	254	116	4317.37	720.569	6	3.5	2	6.27
ASSPSKPPTRVVAVKKPER-KDDSGTGDKSK-a6-b9	reverse_WT_Tau	reverse_WT_Tau	intra-protein xl	208	310	102	3307.77	827.95	4	-1.3	1	6.25
GGGPQHKLNETSGIKSK-TPPKSPSSAKSR-a15-b10	reverse_WT_Tau	WT_Tau	intra-protein xl	183	240	57	3116.66	780.173	4	0.4	1	6.22
IGSTENLKHQPGGGK-K15-156	WT_Tau	-	monolink	274	n/a	-	1677.87	560.297	3	-1.5	1	6.19
IGSTENLKHQPGGGKVQIINK-GGGPQHKLNETSGIKSK-a15-b15	WT_Tau	reverse_WT_Tau	intra-protein xl	274	183	91	4092.2	1365.07	3	-2.4	1	6.05
IETHKLTFR-DKFDLK-a5-b2	WT_Tau	reverse_WT_Tau	intra-protein xl	375	95	280	2046.12	683.049	3	4.5	1	5.99
ESKVEVQGGGPK-VVAVKKPER-a3-b5	reverse_WT_Tau	reverse_WT_Tau	intra-protein xl	102	217	115	2376.35	793.123	3	3.5	4	5.91
SKIGSTENLKHQPGGGK-SKASSPSKPPTR-a2-b8	WT_Tau	reverse_WT_Tau	intra-protein xl	259	208	51	3116.66	624.34	5	0.6	1	5.91
AKTDHGAEIVYK-SKASSPSKPPTR-a2-b2	WT_Tau	reverse_WT_Tau	intra-protein xl	385	202	183	2710.43	904.485	3	1.4	2	5.88
LQTAPVPXPDLKNVKSK-YVIEAGHDTKAKANER-a15-b12	WT_Tau	reverse_WT_Tau	intra-protein xl	257	59	198	3820.01	956.011	4	-1.9	1	5.77
ADSTESGPEESGDETPTQLPSEKLGADTDGEQDQHMTYGGQDKR-KPERTPPTPLSPTRSR-a43-b1	reverse_WT_Tau	reverse_WT_Tau	intra-protein xl	418	218	200	6650.06	1331.02	5	-4.6	4	5.72
VEVQGGGPKHHINGLSGCKSTVK-K9-K19	reverse_WT_Tau	-	intralink	111	121	10	2526.31	843.112	3	4.2	3	5.7
GAAPPGQKGQANATR-LNETSGIKSK-a8-b8	WT_Tau	reverse_WT_Tau	intra-protein xl	163	183	20	2636.39	879.805	3	1.1	1	5.64
GAAPPGQKGQANATRIPAK-IPAKTPPAPK-a8-b4	WT_Tau	WT_Tau	intra-protein xl	163	174	11	2988.69	997.237	3	0.1	1	5.57
DNIKHVPGGGSVQIVYKPVDLSKVTSK-DGSKPPEGSSPPTKPAPPTK-a23-b14	WT_Tau	reverse_WT_Tau	intra-protein xl	317	262	55	4976.63	1245.16	4	-3.9	1	5.57
QGPPAAGRPTAIKTKGDAGK-GAAPPGQKGQANATRIPAK-a15-b8	reverse_WT_Tau	WT_Tau	intra-protein xl	294	163	131	3890.11	973.536	4	-2.5	1	5.56
DGSKPPEGSSPPTKPAPPTKAPIR-QGPPAAGRPTAIKTK-a20-b13	reverse_WT_Tau	reverse_WT_Tau	intra-protein xl	268	292	24	4041.2	1348.07	3	-1.3	2	5.54
VQSKIGSLDNITHVPGGGNK-GQANATRIPAKTPPAPK-a4-b11	WT_Tau	WT_Tau	intra-protein xl	353	174	179	3875.11	776.03	5	2.6	1	5.49
TANAQGKQGPPAAGRPTAIK-KPERTPPTPLSPTRSR-a7-b1	reverse_WT_Tau	reverse_WT_Tau	intra-protein xl	279	218	61	3890.11	973.535	4	-3.7	1	5.47
ENAKAKTDHGAEIVYK-GDAGKAK-a6-b5	WT_Tau	reverse_WT_Tau	intra-protein xl	385	299	86	2556.32	853.114	3	-0.5	1	5.46
VQSKIGSLDNITHVPGGGNKK-K20-155	WT_Tau	-	monolink	369	n/a	-	2303.26	768.76	3	-1.6	1	5.44
LDLSNVQSKCGSK-LNETSGIKSK-a9-b8	WT_Tau	reverse_WT_Tau	intra-protein xl	290	183	107	2648.36	883.793	3	-4.7	1	5.4
SRLQTAPVPXPDLKNVK-GADGKTKIATPR-a14-b5	WT_Tau	WT_Tau	intra-protein xl	254	148	106	3260.78	1087.93	3	-3.3	1	5.35
DQGGYTMHQDQEGDTDAGLKESPLQTPTEDGSEEPGSETSDAK-SLDVPKYVIQVSGGGPVHK-a20-b6	WT_Tau	reverse_WT_Tau	intra-protein xl	44	131	87	6654.05	1110.02	6	-1.5	1	5.34
HHINGLSGCKSTVKSLDVPK-K14-155	reverse_WT_Tau	-	monolink	125	n/a	-	2331.24	778.087	3	-0.1	1	5.32
HVPGGGSVQIVYKPVDLSKVTSK-AKTDHGAEIVYK-a19-b2	WT_Tau	WT_Tau	intra-protein xl	317	385	68	3863.07	966.776	4	-2.4	1	5.29
LDLSNVQSKCGSKDNIK-KDDSGTGDKSK-a13-b9	WT_Tau	reverse_WT_Tau	intra-protein xl	294	310	16	3179.55	1060.86	3	-2.9	1	5.28
GGGPQHKLNETSGIKSK-QGPPAAGRPTAIKTK-a7-b13	reverse_WT_Tau	reverse_WT_Tau	intra-protein xl	175	292	117	3366.84	1123.29	3	0.4	1	5.28
CGSLGNIHHKPGGGQVEVKSEK-LNETSGIKSK-a10-b8	WT_Tau	reverse_WT_Tau	intra-protein xl	331	183	148	3530.82	883.714	4	2.8	1	5.22
GGGPQHKLNETSGIKSK-GGGPQHKLNETSGIKSK-a7-b7	reverse_WT_Tau	reverse_WT_Tau	intra-protein xl	175	175	0	3611.91	1204.98	3	0.9	1	5.21
GGGPQHKLNETSGIK-KLDLSNVQSK-a7-b1	reverse_WT_Tau	WT_Tau	intra-protein xl	175	281	106	2790.48	931.169	3	-1.8	2	5.18
SKIGSTENLKHQPGGGK-LQTAPVPXPDLKNVK-a10-b12	WT_Tau	WT_Tau	intra-protein xl	267	254	13	3540.9	886.232	4	0.1	1	5.11
YVIQVSGGGPVHKINDKSGCK-VNKLDPXPVPATQLRSK-a13-b3	reverse_WT_Tau	reverse_WT_Tau	intra-protein xl	144	188	44	4289.28	858.864	5	3	2	5.11
GGGPQHKLNETSGIKSK-SKIGSTENLK-a15-b2	reverse_WT_Tau	WT_Tau	intra-protein xl	183	259	76	2950.59	738.654	4	4.3	2	5.07
HHINGLSGCKSTVK-FTLKHTEIK-a10-b4	reverse_WT_Tau	reverse_WT_Tau	intra-protein xl	121	67	54	2790.49	698.629	4	0.5	1	5.06
NGGGPVHTINDLSGIKSQVRDK-LQTAPVPMPDLKNVKSK-a16-b12	reverse_WT_Tau	WT_Tau	intra-protein xl	89	254	165	4294.31	859.87	5	0	1	5.06
DNIKHVPGGGSVQIVYKPVDLSKVTSK-K27-156	WT_Tau	-	monolink	321	n/a	-	3020.65	756.171	4	-0.7	1	5.03
LDPMPVPATQLRSKASSPSKPPTR-LTFRENAKAK-a20-b8	reverse_WT_Tau	WT_Tau	intra-protein xl	208	383	175	3875.11	776.03	5	0.7	1	5.01
QEFEVXEDHAGTYGLGDRKDQGGYTMHQDQEGDTDAGLK-VQSKIGSLDNITHVPGGGNKK-a19-b4	WT_Tau	WT_Tau	intra-protein xl	24	353	329	6630.07	1106.02	6	-3.7	1	5
YVIQVSGGGPVHKINDK-DDSGTGDKSKSVMR-a13-b10	reverse_WT_Tau	reverse_WT_Tau	intra-protein xl	144	312	168	3429.71	858.436	4	-2.4	1	4.99
ASSPSKPPTRVVAVK-ESKVEVQGGGPK-a6-b3	reverse_WT_Tau	reverse_WT_Tau	intra-protein xl	208	102	106	2874.59	959.205	3	3	1	4.98
DGSKPPEGSSPPTKPAPPTK-TPPAPKTPPSSGEPPKSGDR-a4-b16	reverse_WT_Tau	WT_Tau	intra-protein xl	252	190	62	4114.1	823.828	5	3.3	1	4.96
QGPPAAGRPTAIKTKGDAGK-TPPSSGEPPKSGDR-a13-b10	reverse_WT_Tau	WT_Tau	intra-protein xl	292	190	102	3468.8	868.208	4	1.4	1	4.94
KDQGGYTXHQDQEGDTDAGLKESPLQTPTEDGSEEPGSETSDAK-YVIQVSGGGPVHKINDK-a21-b13	WT_Tau	reverse_WT_Tau	intra-protein xl	44	144	100	6629.06	1105.85	6	2.3	1	4.94
AKANERFTLK-SEKLDFKDR-a2-b3	reverse_WT_Tau	WT_Tau	intra-protein xl	59	343	284	2451.31	818.111	3	-1.2	1	4.85
INDKSGCKSQVNSLDLK-NVKSKIGSTENLK-a4-b3	reverse_WT_Tau	WT_Tau	intra-protein xl	148	257	109	3459.81	865.96	4	-4.1	1	4.84
NGGGPVHTINDLSGIKSQVRDK-SGCKSQVNSLDLKK-a16-b4	reverse_WT_Tau	reverse_WT_Tau	intra-protein xl	89	152	63	3992.09	1331.7	3	4.1	1	4.81
NIIQVKGGGPQHK-KDDSGTGDKSK-a6-b1	reverse_WT_Tau	reverse_WT_Tau	intra-protein xl	168	302	134	2649.37	884.13	3	-1.7	1	4.78
LQTAPVPMPDLKNVKSK-INDKSGCK-a12-b4	WT_Tau	reverse_WT_Tau	intra-protein xl	254	148	106	2923.54	975.521	3	-3.8	3	4.77
KNGGGPVHTINDLSGIK-LDFKDRVQSK-a1-b4	reverse_WT_Tau	WT_Tau	intra-protein xl	73	347	274	3078.64	770.667	4	-3.6	1	4.74
QEFEVXEDHAGTYGLGDRKDQGGYTMHQDQEGDTDAGLK-VQSKIGSLDNITHVPGGGNKK-a19-b20	WT_Tau	WT_Tau	intra-protein xl	24	369	345	6630.07	1327.02	5	-3.2	1	4.67
XVSKSKDGTGSDDK-KVAVVRTPPK-a6-b1	WT_Tau	WT_Tau	intra-protein xl	132	225	93	2701.44	901.488	3	3.5	1	4.6
TPPAPKTPPSSGEPPKSGDR-TKIATPRGAAPPGQK-a6-b2	WT_Tau	WT_Tau	intra-protein xl	180	150	30	3631.93	1211.65	3	-0.6	1	4.58
SGCKSQVNSLDLK-LNETSGIKSK-a4-b8	reverse_WT_Tau	reverse_WT_Tau	intra-protein xl	152	183	31	2648.38	883.8	3	2.6	1	4.55
SLDVPKYVIQVSGGGPVHKINDK-LNETSGIKSK-a19-b8	reverse_WT_Tau	reverse_WT_Tau	intra-protein xl	144	183	39	3662.98	916.754	4	-1.2	1	4.49
GAAPPGQKGQANATR-VNKLDPXPVPATQLR-a8-b3	WT_Tau	reverse_WT_Tau	intra-protein xl	163	188	25	3254.73	1085.92	3	4	2	4.48
YVIQVSGGGPVHKINDKSGCK-SRLQTAPVPXPDLKNVK-a13-b14	reverse_WT_Tau	WT_Tau	intra-protein xl	144	254	110	4289.28	1073.33	4	4	2	4.48
GGGPQHKLNETSGIK-K7-156	reverse_WT_Tau	-	monolink	175	n/a	-	1677.87	560.297	3	-1.1	1	4.47
VNKLDPMPVPATQLR-TPSLPTPPTREPKK-a3-b13	reverse_WT_Tau	WT_Tau	intra-protein xl	188	224	36	3363.87	1122.3	3	2	1	4.46
LDLSNVQSKCGSK-KVAVVRTPPK-a9-b1	WT_Tau	WT_Tau	intra-protein xl	290	225	65	2666.48	889.834	3	-0.5	1	4.46
GAAPPGQKGQANATRIPAK-SKIGSTENLK-a8-b2	WT_Tau	WT_Tau	intra-protein xl	163	259	96	3045.65	1016.22	3	-2.3	1	4.4
GAAPPGQKGQANATRIPAK-TPPKSPSSAKSR-a8-b10	WT_Tau	WT_Tau	intra-protein xl	163	240	77	3211.75	1071.59	3	2.6	1	4.4
TANAQGKQGPPAAGRPTAIK-TKIATPRGAAPPGQK-a7-b2	reverse_WT_Tau	WT_Tau	intra-protein xl	279	150	129	3562.97	1188.67	3	1.3	1	4.38
CGSKDNIKHVPGGGSVQIVYKPVDLSK-K27-156	WT_Tau	-	monolink	317	n/a	-	3037.59	760.404	4	-1.7	2	4.37
KDQGGYTXHQDQEGDTDAGLKESPLQTPTEDGSEEPGSETSDAK-GAAPPGQKGQANATRIPAK-a21-b8	WT_Tau	WT_Tau	intra-protein xl	44	163	119	6651.05	1109.52	6	-2.8	1	4.35
KNGGGPVHTINDLSGIKSQVR-SKVNKLDPMPVPATQLR-a17-b5	reverse_WT_Tau	reverse_WT_Tau	intra-protein xl	89	188	99	4207.31	1403.44	3	4.7	3	4.33
YVIEAGHDTKAKANER-QGPPAAGRPTAIKTK-a10-b13	reverse_WT_Tau	reverse_WT_Tau	intra-protein xl	57	292	235	3430.82	858.712	4	-4.3	1	4.33
GAAPPGQKGQANATR-SKIGSTENLK-a8-b2	WT_Tau	WT_Tau	intra-protein xl	163	259	96	2636.39	660.106	4	1.5	2	4.26
CGSLGNIHHKPGGGQVEVKSEK-KVAVVR-a10-b1	WT_Tau	WT_Tau	intra-protein xl	331	225	106	3125.69	782.43	4	3.5	1	4.26
ESKVEVQGGGPK-EPKKVAVVR-a3-b4	reverse_WT_Tau	WT_Tau	intra-protein xl	102	225	123	2376.35	793.124	3	4	1	4.25
SKVNKLDPXPVPATQLR-ENAKAKTDHGAEIVYK-a5-b6	reverse_WT_Tau	WT_Tau	intra-protein xl	188	385	197	3820.01	956.011	4	-1.9	1	4.25
DGSKPPEGSSPPTKPAPPTKAPIR-QGPPAAGRPTAIKTK-a4-b13	reverse_WT_Tau	reverse_WT_Tau	intra-protein xl	252	292	40	4041.2	1348.07	3	-0.7	2	4.24
VQSKIGSLDNITHVPGGGNK-TPSLPTPPTREPKK-a4-b13	WT_Tau	WT_Tau	intra-protein xl	353	224	129	3706.02	927.512	4	3.3	1	4.22
AKTDHGAEIVYKSPVVSGDTSPR-SKASSPSKPPTRVVAVK-a2-b2	WT_Tau	reverse_WT_Tau	intra-protein xl	385	202	183	4289.28	1073.33	4	-4.3	1	4.2
YVIQVSGGGPVHKINDK-K13-K17	reverse_WT_Tau	-	intralink	144	148	4	1948.04	650.354	3	-1.9	1	4.15
FTLKHTEIK-SEKLDFKDR-a4-b7	reverse_WT_Tau	WT_Tau	intra-protein xl	67	347	280	2390.28	797.769	3	-0.6	1	4.11
TANAQGKQGPPAAGRPTAIKTK-KLDLSNVQSKCGSK-a20-b1	reverse_WT_Tau	WT_Tau	intra-protein xl	292	281	11	3863.08	1288.7	3	1.8	1	4.06
TDHGAEIVYKSPVVSGDTSPR-AKANERFTLK-a10-b2	WT_Tau	reverse_WT_Tau	intra-protein xl	395	59	336	3528.83	883.216	4	2.8	1	4.04
DGSKPPEGSSPPTKPAPPTKAPIRTANAQGK-KLDLSNVQSK-a4-b1	reverse_WT_Tau	WT_Tau	intra-protein xl	252	281	29	4350.33	1088.59	4	3.5	1	4.01
SKIGSTENLKHQPGGGK-SKIGSTENLK-a2-b2	WT_Tau	WT_Tau	intra-protein xl	259	259	0	2950.59	984.536	3	4.3	2	3.98
CGSLGNIHHKPGGGQVEVK-KPERTPPTPLSPTRSR-a10-b1	WT_Tau	reverse_WT_Tau	intra-protein xl	331	218	113	3930.08	787.023	5	3	2	3.91
LQTAPVPXPDLKNVKSK-LDLSNVQSKCGSK-a12-b9	WT_Tau	WT_Tau	intra-protein xl	254	290	36	3453.83	1152.28	3	1.9	1	3.88
FDLKESKVEVQGGGPK-KPERTPPTPLSPTR-a4-b1	reverse_WT_Tau	reverse_WT_Tau	intra-protein xl	99	218	119	3430.86	1144.63	3	4.8	2	3.87
AKTDHGAEIVYKSPVVSGDTSPR-K2-155	WT_Tau	-	monolink	385	n/a	-	2568.31	857.111	3	-4.4	2	3.85
KLDLSNVQSKCGSK-ESKVEVQGGGPK-a1-b3	WT_Tau	reverse_WT_Tau	intra-protein xl	281	102	179	2914.51	972.512	3	1.5	1	3.81
DRVQSKIGSLDNITHVPGGGNK-LNETSGIKSKVNK-a6-b10	WT_Tau	reverse_WT_Tau	intra-protein xl	353	185	168	3846.07	962.526	4	2.9	2	3.8
SPSSAKSRLQTAPVPXPDLK-TANAQGKQGPPAAGRPTAIK-a6-b7	WT_Tau	reverse_WT_Tau	intra-protein xl	240	279	39	4196.24	1050.07	4	0.6	1	3.8
APIRTANAQGKQGPPAAGRPTAIK-YVIQVSGGGPVHKINDK-a11-b13	reverse_WT_Tau	reverse_WT_Tau	intra-protein xl	279	144	135	4318.36	864.68	5	-0.8	2	3.77
AKTDHGAEIVYK-AKANERFTLK-a2-b2	WT_Tau	reverse_WT_Tau	intra-protein xl	385	59	326	2645.42	882.816	3	2.5	1	3.71
DRVQSKIGSLDNITHVPGGGNK-NVKSKIGSTENLK-a6-b5	WT_Tau	WT_Tau	intra-protein xl	353	259	94	3846.08	962.527	4	4.6	1	3.63
SKIGSTENLKHQPGGGK-SKASSPSKPPTR-a10-b8	WT_Tau	reverse_WT_Tau	intra-protein xl	267	208	59	3116.66	780.174	4	2.2	1	3.6
LQTAPVPXPDLKNVKSK-SKDGTGSDDK-a12-b2	WT_Tau	WT_Tau	intra-protein xl	254	132	122	3027.54	757.893	4	-0.6	1	3.57
IGSLDNITHVPGGGNKKIETHK-K16-K22	WT_Tau	-	intralink	369	375	6	2452.31	614.086	4	2.5	1	3.56
TPPKSPSSAKSR-AKKDDSGTGDK-a4-b2	WT_Tau	reverse_WT_Tau	intra-protein xl	234	301	67	2500.29	834.437	3	4.6	1	3.53
YVIQVSGGGPVHKINDKSGCK-SPSSAKSRLQTAPVPMPDLK-a17-b6	reverse_WT_Tau	WT_Tau	intra-protein xl	148	240	92	4489.36	1123.35	4	2.7	1	3.51
KNGGGPVHTINDLSGIK-SKIGSTENLK-a1-b2	reverse_WT_Tau	WT_Tau	intra-protein xl	73	259	186	2919.56	974.196	3	-1.1	1	3.48
NVKSKIGSTENLK-KLDLSNVQSK-a5-b1	WT_Tau	WT_Tau	intra-protein xl	259	281	22	2685.48	896.169	3	-3.3	1	3.47
LQTAPVPMPDLKNVKSK-INDKSGCK-a15-b4	WT_Tau	reverse_WT_Tau	intra-protein xl	257	148	109	2923.54	731.893	4	-3.9	1	3.42
LDPXPVPATQLRSKASSPSKPPTR-KPERTPPTPLSPTR-a20-b1	reverse_WT_Tau	reverse_WT_Tau	intra-protein xl	208	218	10	4290.3	859.068	5	-4	2	3.36
DGSKPPEGSSPPTKPAPPTK-KPERTPPTPLSPTRSR-a4-b1	reverse_WT_Tau	reverse_WT_Tau	intra-protein xl	252	218	34	3931.06	1311.36	3	-4.2	1	3.27
YVIEAGHDTKAKANER-FTLKHTEIKK-a12-b9	reverse_WT_Tau	reverse_WT_Tau	intra-protein xl	59	72	13	3182.72	1061.91	3	3.8	1	3.25
HVPGGGSVQIVYKPVDLSKVTSK-IGSTENLKHQPGGGK-a13-b8	WT_Tau	WT_Tau	intra-protein xl	311	267	44	4054.18	1014.55	4	-0.7	1	3.23
HTEIKKNGGGPVHTINDLSGIK-SKASSPSKPPTR-a5-b8	reverse_WT_Tau	reverse_WT_Tau	intra-protein xl	72	208	136	3694	1232.34	3	4.4	1	3.21
DNIKHVPGGGSVQIVYKPVDLSKVTSK-DGSKPPEGSSPPTKPAPPTK-a23-b4	WT_Tau	reverse_WT_Tau	intra-protein xl	317	252	65	4976.64	830.447	6	-2.5	1	3.2
INDKSGCKSQVNSLDLK-AKTDHGAEIVYK-a8-b2	reverse_WT_Tau	WT_Tau	intra-protein xl	152	385	233	3373.73	844.44	4	2.4	1	3.19
FDLKESKVEVQGGGPK-AKTDHGAEIVYK-a4-b2	reverse_WT_Tau	WT_Tau	intra-protein xl	99	385	286	3185.66	1062.9	3	0.9	1	3.18
SKVNKLDPXPVPATQLR-SGCKSQVNSLDLKK-a5-b4	reverse_WT_Tau	reverse_WT_Tau	intra-protein xl	188	152	36	3609.93	903.492	4	3.5	1	3.17
SLDVPKYVIQVSGGGPVHK-K19-156	reverse_WT_Tau	-	monolink	144	n/a	-	2135.16	712.729	3	0	5	3.09
GGGPQHKLNETSGIKSK-LQTAPVPXPDLKNVK-a7-b12	reverse_WT_Tau	WT_Tau	intra-protein xl	175	254	79	3540.91	886.235	4	3.7	2	2.99
VNKLDPXPVPATQLRSK-VNKLDPXPVPATQLR-a3-b3	reverse_WT_Tau	reverse_WT_Tau	intra-protein xl	188	188	0	3741.04	1248.02	3	3.3	1	2.99
SLDVPKYVIQVSGGGPVHKINDK-TPPKSPSSAKSR-a19-b10	reverse_WT_Tau	WT_Tau	intra-protein xl	144	240	96	3829.09	1277.37	3	3.3	1	2.9
STVKSLDVPKYVIQVSGGGPVHK-DGSKPPEGSSPPTKPAPPTK-a4-b4	reverse_WT_Tau	reverse_WT_Tau	intra-protein xl	125	252	127	4506.39	1127.61	4	-1.7	1	2.88
SPSSAKSRLQTAPVPMPDLK-K6-K20	WT_Tau	-	intralink	240	254	14	2247.18	750.069	3	-4.4	4	2.83
SLDVPKYVIQVSGGGPVHKINDK-SKIGSTENLK-a19-b2	reverse_WT_Tau	WT_Tau	intra-protein xl	144	259	115	3662.98	916.754	4	-1.2	1	2.8
AKTDHGAEIVYKSPVVSGDTSPR-KLDLSNVQSKCGSK-a12-b10	WT_Tau	WT_Tau	intra-protein xl	395	290	105	4114.1	1029.53	4	-0.2	1	2.79
CGSKDNIKHVPGGGSVQIVYKPVDLSK-AKANERFTLK-a4-b2	WT_Tau	reverse_WT_Tau	intra-protein xl	294	59	235	4196.26	1050.07	4	4.8	1	2.72
STVKSLDVPKYVIQVSGGGPVHK-AKTDHGAEIVYK-a10-b2	reverse_WT_Tau	WT_Tau	intra-protein xl	131	385	254	3863.07	1288.7	3	-2.2	1	2.68
TANAQGKQGPPAAGRPTAIKTK-AKTDHGAEIVYK-a20-b2	reverse_WT_Tau	WT_Tau	intra-protein xl	292	385	93	3630.93	1211.32	3	-4.5	2	2.66
SQVNSLDLKKNIIQVK-KDDSGTGDKSK-a10-b1	reverse_WT_Tau	reverse_WT_Tau	intra-protein xl	162	302	140	3100.66	1034.56	3	-0.4	1	2.62
SPSSAKSRLQTAPVPXPDLK-KIETHKLTFR-a6-b1	WT_Tau	WT_Tau	intra-protein xl	240	370	130	3534.93	884.739	4	0.5	1	2.59
LDPMPVPATQLRSKASSPSKPPTR-YVIQVSGGGPVHKINDK-a14-b13	reverse_WT_Tau	reverse_WT_Tau	intra-protein xl	202	144	58	4508.4	1128.11	4	-4.7	1	2.59
AKTDHGAEIVYKSPVVSGDTSPR-K2-156	WT_Tau	-	monolink	385	n/a	-	2569.31	857.446	3	4.7	1	2.55
NGGGPVHTINDLSGIKSQVR-STVKSLDVPK-a16-b4	reverse_WT_Tau	reverse_WT_Tau	intra-protein xl	89	125	36	3258.77	1087.26	3	3.5	2	2.5
TANAQGKQGPPAAGRPTAIKTK-SGCKSQVNSLDLKK-a20-b13	reverse_WT_Tau	reverse_WT_Tau	intra-protein xl	292	161	131	3863.05	966.77	4	-4.8	3	2.5
GAAPPGQKGQANATRIPAK-LQTAPVPMPDLKNVKSK-a8-b12	WT_Tau	WT_Tau	intra-protein xl	163	254	91	3835.1	1279.38	3	-2.6	1	2.45
VQSKIGSLDNITHVPGGGNKK-LQTAPVPMPDLKNVKSK-a4-b15	WT_Tau	WT_Tau	intra-protein xl	353	257	96	4151.3	1038.83	4	4.5	1	2.44
NGGGPVHTINDLSGIKSQVR-VNKLDPXPVPATQLR-a16-b3	reverse_WT_Tau	reverse_WT_Tau	intra-protein xl	89	188	99	3880.08	1294.37	3	3.9	1	2.41
AKTDHGAEIVYKSPVVSGDTSPR-K12-155	WT_Tau	-	monolink	395	n/a	-	2568.31	857.111	3	-4.4	1	2.38
DGSKPPEGSSPPTKPAPPTK-IATPRGAAPPGQKGQANATR-a14-b13	reverse_WT_Tau	WT_Tau	intra-protein xl	262	163	99	4073.12	1019.29	4	-1.9	1	2.34
TPPAPKTPPSSGEPPKSGDR-KNGGGPVHTINDLSGIK-a6-b1	WT_Tau	reverse_WT_Tau	intra-protein xl	180	73	107	3846	1283.01	3	1.2	1	2.33
LDLSNVQSKCGSK-ESKVEVQGGGPK-a9-b3	WT_Tau	reverse_WT_Tau	intra-protein xl	290	102	188	2786.41	929.812	3	-0.3	1	2.3
TANAQGKQGPPAAGRPTAIK-TPPSSGEPPKSGDR-a7-b10	reverse_WT_Tau	WT_Tau	intra-protein xl	279	190	89	3481.77	871.451	4	-5	1	2.3
NGGGPVHTINDLSGIKSQVRDK-NVKSKIGSTENLK-a16-b5	reverse_WT_Tau	WT_Tau	intra-protein xl	89	259	170	3846.08	962.527	4	4.3	1	2.25
QEFEVMEDHAGTYGLGDRKDQGGYTMHQDQEGDTDAGLK-VQSKIGSLDNITHVPGGGNKK-a19-b4	WT_Tau	WT_Tau	intra-protein xl	24	353	329	6614.07	1103.35	6	-4.8	4	2.22
NGGGPVHTINDLSGIKSQVRDK-LNETSGIKSKVNK-a16-b10	reverse_WT_Tau	reverse_WT_Tau	intra-protein xl	89	185	96	3846.07	962.526	4	2.9	1	2.21
GAAPPGQKGQANATRIPAK-SRLQTAPVPMPDLKNVK-a8-b14	WT_Tau	WT_Tau	intra-protein xl	163	254	91	3863.11	966.786	4	-2.4	1	2.19
VTSKCGSLGNIHHKPGGGQVEVKSEK-GAAPPGQKGQANATRIPAK-a4-b8	WT_Tau	WT_Tau	intra-protein xl	321	163	158	4702.47	1176.63	4	0.1	1	2.03
VQSKIGSLDNITHVPGGGNK-VQSKIGSLDNITHVPGGGNK-a4-b4	WT_Tau	WT_Tau	intra-protein xl	353	353	0	4178.21	836.65	5	0.2	1	2
TKIATPRGAAPPGQK-SKIGSTENLK-a2-b2	WT_Tau	WT_Tau	intra-protein xl	150	259	109	2705.5	902.841	3	-2.6	1	1.97
SPSSAKSRLQTAPVPXPDLK-HHINGLSGCKSTVK-a6-b10	WT_Tau	reverse_WT_Tau	intra-protein xl	240	121	119	3799.96	950.998	4	-2.6	2	1.91
TANAQGKQGPPAAGRPTAIKTK-KLDLSNVQSKCGSK-a7-b1	reverse_WT_Tau	WT_Tau	intra-protein xl	279	281	2	3863.07	966.776	4	1.3	1	1.91
ADSTESGPEESGDETPTQLPSEKLGADTDGEQDQHXTYGGQDK-SKVNKLDPXPVPATQLR-a23-b5	reverse_WT_Tau	reverse_WT_Tau	intra-protein xl	398	188	210	6600.05	1321.02	5	4.9	1	1.89
QEFEVMEDHAGTYGLGDRKDQGGYTXHQDQEGDTDAGLK-VQSKIGSLDNITHVPGGGNKK-a19-b4	WT_Tau	WT_Tau	intra-protein xl	24	353	329	6630.08	1327.02	5	-2.8	2	1.89
HTEIKKNGGGPVHTINDLSGIK-K5-K22	reverse_WT_Tau	-	intralink	72	89	17	2452.32	818.447	3	4.1	1	1.84
GAAPPGQKGQANATRIPAK-FDLKESKVEVQGGGPK-a8-b4	WT_Tau	reverse_WT_Tau	intra-protein xl	163	99	64	3686.99	1230	3	3.3	1	1.77
VNKLDPXPVPATQLRSK-KPERTPPTPLSPTRSR-a3-b1	reverse_WT_Tau	reverse_WT_Tau	intra-protein xl	188	218	30	3866.11	1289.71	3	-1.7	1	1.74
GAAPPGQKGQANATRIPAK-VNKLDPMPVPATQLRSK-a8-b3	WT_Tau	reverse_WT_Tau	intra-protein xl	163	188	25	3863.11	966.786	4	-2.4	1	1.72
GGGPQHKLNETSGIKSK-KPERTPPTPLSPTRSR-a15-b1	reverse_WT_Tau	reverse_WT_Tau	intra-protein xl	183	218	35	3694	1232.34	3	2.5	1	1.65
SKIGSTENLKHQPGGGK-LQTAPVPXPDLKNVK-a2-b12	WT_Tau	WT_Tau	intra-protein xl	259	254	5	3540.91	1181.31	3	2.9	2	1.64
NGGGPVHTINDLSGIKSQVR-VNKLDPMPVPATQLR-a16-b3	reverse_WT_Tau	reverse_WT_Tau	intra-protein xl	89	188	99	3864.09	1289.04	3	5	2	1.6
LDLSNVQSKCGSKDNIK-NVKSKIGSTENLK-a13-b3	WT_Tau	WT_Tau	intra-protein xl	294	257	37	3459.81	865.961	4	-3.8	1	1.57
SRLQTAPVPXPDLKNVK-TPPAPKTPPSSGEPPK-a14-b6	WT_Tau	WT_Tau	intra-protein xl	254	180	74	3633.93	1212.32	3	-2.7	1	1.55
VNKLDPXPVPATQLR-LNETSGIKSK-a3-b8	reverse_WT_Tau	reverse_WT_Tau	intra-protein xl	188	183	5	2907.57	727.9	4	-1.3	1	1.47
DGSKPPEGSSPPTKPAPPTK-QGPPAAGRPTAIKTKGDAGK-a14-b15	reverse_WT_Tau	reverse_WT_Tau	intra-protein xl	262	294	32	4032.12	1345.05	3	-3	1	1.38
QGPPAAGRPTAIKTKGDAGK-K13-K15	reverse_WT_Tau	-	intralink	292	294	2	2058.12	687.049	3	0	1	1.38
INDKSGCKSQVNSLDLK-INDKSGCKSQVNSLDLK-a8-b8	reverse_WT_Tau	reverse_WT_Tau	intra-protein xl	152	152	0	3947.98	1317	3	-2.9	1	1.32
CGSKDNIKHVPGGGSVQIVYKPVDLSK-K21-156	WT_Tau	-	monolink	311	n/a	-	3037.58	1013.53	3	-3.3	2	1.28
DGSKPPEGSSPPTKPAPPTKAPIRTANAQGK-YVIEAGHDTKAK-a14-b10	reverse_WT_Tau	reverse_WT_Tau	intra-protein xl	262	57	205	4550.39	1138.61	4	3.6	1	1.2
QGPPAAGRPTAIKTKGDAGK-YVIQVSGGGPVHKINDK-a13-b13	reverse_WT_Tau	reverse_WT_Tau	intra-protein xl	292	144	148	3868.1	968.034	4	2.1	2	1.18
DGSKPPEGSSPPTKPAPPTKAPIR-TKIATPRGAAPPGQK-a20-b2	reverse_WT_Tau	WT_Tau	intra-protein xl	268	150	118	4041.2	1348.07	3	-1.3	1	1.08
LDLSNVQSKCGSKDNIK-NVKSKIGSTENLK-a9-b3	WT_Tau	WT_Tau	intra-protein xl	290	257	33	3459.81	865.961	4	-3.8	1	1.07
LDPXPVPATQLRSKASSPSKPPTR-K20-155	reverse_WT_Tau	-	monolink	208	n/a	-	2731.47	911.497	3	-1.2	2	1.04
VQSKIGSLDNITHVPGGGNK-YVIQVSGGGPVHKINDK-a4-b13	WT_Tau	reverse_WT_Tau	intra-protein xl	353	144	209	3968.11	993.035	4	-1.1	1	-0.26

## Sheet: Fig4f_WT3
Id	Protein1	Protein2	XLType	AbsPos1	AbsPos2	deltaAA	Mr	Mz	z	Error_rel[ppm]	nseen	ld-Score
VQIINKKLDLSNVQSK-K6-K7	WT_Tau	-	intralink	280	281	1	1964.13	655.718	3	-0.1	19	50.12
DNIKHVPGGGSVQIVYKPVDLSK-K4-155	WT_Tau	-	monolink	298	n/a	-	2604.42	869.149	3	-1.8	7	49.08
HVPGGGSVQIVYKPVDLSKVTSK-K19-155	WT_Tau	-	monolink	317	n/a	-	2549.42	638.363	4	-1.5	8	46.78
HQPGGGKVQIINK-K7-156	WT_Tau	-	monolink	274	n/a	-	1530.85	511.291	3	-1.4	9	45.99
HQPGGGKVQIINK-K7-155	WT_Tau	-	monolink	274	n/a	-	1529.87	510.964	3	-0.7	9	45.93
DNIKHVPGGGSVQIVYKPVDLSK-K4-156	WT_Tau	-	monolink	298	n/a	-	2605.41	869.476	3	-2.1	35	45.24
HVPGGGSVQIVYKPVDLSK-K13-156	WT_Tau	-	monolink	311	n/a	-	2135.16	712.729	3	-0.3	341	45.12
HVPGGGSVQIVYKPVDLSKVTSK-K19-K23	WT_Tau	-	intralink	317	321	4	2532.4	634.107	4	0.7	2	45.05
HVPGGGSVQIVYKPVDLSKVTSK-K19-156	WT_Tau	-	monolink	317	n/a	-	2550.4	638.609	4	-0.8	47	44.72
KLDLSNVQSKCGSK-K10-155	WT_Tau	-	monolink	290	n/a	-	1717.9	573.642	3	-1.7	2	44.36
IGSLDNITHVPGGGNKK-K16-155	WT_Tau	-	monolink	369	n/a	-	1861.01	621.343	3	-1.5	343	44.16
KLDLSNVQSKCGSK-K10-156	WT_Tau	-	monolink	290	n/a	-	1718.89	573.97	3	0.1	4	44.06
CGSLGNIHHKPGGGQVEVK-K10-155	WT_Tau	-	monolink	331	n/a	-	2128.09	710.369	3	-0.7	17	43.3
HVPGGGSVQIVYKPVDLSKVTSK-K13-K19	WT_Tau	-	intralink	311	317	6	2532.4	845.14	3	0.3	111	42.72
CGSLGNIHHKPGGGQVEVKSEK-K19-155	WT_Tau	-	monolink	340	n/a	-	2472.25	825.092	3	-1.2	7	42.53
IGSTENLKHQPGGGK-KLDLSNVQSK-a8-b1	WT_Tau	WT_Tau	intra-protein xl	267	281	14	2790.49	931.17	3	-0.7	5	41.83
IETHKLTFR-K5-155	WT_Tau	-	monolink	375	n/a	-	1298.73	433.919	3	-2.8	1	41.77
HVPGGGSVQIVYKPVDLSK-K13-155	WT_Tau	-	monolink	311	n/a	-	2134.18	712.401	3	-1	675	41.56
CGSLGNIHHKPGGGQVEVK-K10-156	WT_Tau	-	monolink	331	n/a	-	2129.07	710.697	3	0	25	40.99
LDLSNVQSKCGSKDNIK-K13-156	WT_Tau	-	monolink	294	n/a	-	2061.04	688.021	3	-0.7	2	40.75
CGSLGNIHHKPGGGQVEVKSEK-K19-156	WT_Tau	-	monolink	340	n/a	-	2473.25	825.425	3	5	15	40.53
IGSLDNITHVPGGGNKK-K17-156	WT_Tau	-	monolink	370	n/a	-	1861.99	621.67	3	-1.2	40	40.38
IGSLDNITHVPGGGNKK-K16-156	WT_Tau	-	monolink	369	n/a	-	1861.99	621.671	3	0	125	40.33
LDLSNVQSKCGSK-VQIINKK-a9-b6	WT_Tau	WT_Tau	intra-protein xl	290	280	10	2414.32	604.588	4	-0.1	4	39.95
KLDLSNVQSKCGSK-SKIGSTENLK-a10-b2	WT_Tau	WT_Tau	intra-protein xl	290	259	31	2776.46	926.496	3	-0.3	1	39.25
KLDLSNVQSK-LDFKDR-a1-b4	WT_Tau	WT_Tau	intra-protein xl	281	347	66	2061.11	516.285	4	-1.5	2	39.19
CGSKDNIKHVPGGGSVQIVYKPVDLSK-K4-K8	WT_Tau	-	intralink	294	298	4	3019.58	1007.53	3	0.2	6	39.15
VQSKIGSLDNITHVPGGGNK-KLDLSNVQSK-a4-b1	WT_Tau	WT_Tau	intra-protein xl	353	281	72	3288.77	823.199	4	-0.4	2	39.05
CGSLGNIHHKPGGGQVEVK-SEKLDFK-a10-b3	WT_Tau	WT_Tau	intra-protein xl	331	343	12	2976.51	745.136	4	-0.5	5	38.95
HQPGGGKVQIINK-KLDLSNVQSK-a7-b1	WT_Tau	WT_Tau	intra-protein xl	274	281	7	2643.47	529.701	5	-1.5	2	38.82
HVPGGGSVQIVYKPVDLSK-K13-K19	WT_Tau	-	intralink	311	317	6	2117.15	706.725	3	-0.7	2	38.82
VQSKIGSLDNITHVPGGGNK-K4-155	WT_Tau	-	monolink	353	n/a	-	2175.16	726.063	3	-0.5	25	38.67
KLDLSNVQSK-CGSKDNIK-a1-b4	WT_Tau	WT_Tau	intra-protein xl	281	294	13	2189.14	730.72	3	0.8	6	38.48
VQSKIGSLDNITHVPGGGNK-SEKLDFKDR-a4-b3	WT_Tau	WT_Tau	intra-protein xl	353	343	10	3294.72	550.127	6	-1.2	8	38.36
LDLSNVQSKCGSKDNIK-K9-K13	WT_Tau	-	intralink	290	294	4	2043.03	682.018	3	-0.3	3	38.24
KIETHKLTFR-K6-155	WT_Tau	-	monolink	375	n/a	-	1426.83	476.617	3	-3.4	1	38.22
VTSKCGSLGNIHHKPGGGQVEVK-K4-155	WT_Tau	-	monolink	321	n/a	-	2543.32	636.839	4	-2.5	9	37.86
VQSKIGSLDNITHVPGGGNK-SEKLDFK-a4-b3	WT_Tau	WT_Tau	intra-protein xl	353	343	10	3023.59	605.726	5	-0.7	12	37.84
KLDLSNVQSKCGSK-K10-K14	WT_Tau	-	intralink	290	294	4	1700.88	567.966	3	-1.2	4	37.83
VQSKIGSLDNITHVPGGGNKK-K4-156	WT_Tau	-	monolink	353	n/a	-	2304.24	577.069	4	-0.4	23	37.81
KIETHKLTFR-K6-156	WT_Tau	-	monolink	375	n/a	-	1427.81	476.945	3	-1.9	2	37.79
VQIINKK-LDFKDR-a6-b4	WT_Tau	WT_Tau	intra-protein xl	280	347	67	1772.02	444.012	4	-1.9	2	37.75
IETHKLTFR-K5-156	WT_Tau	-	monolink	375	n/a	-	1299.72	434.247	3	-1.3	1	37.65
HQPGGGKVQIINK-SKIGSTENLK-a7-b2	WT_Tau	WT_Tau	intra-protein xl	274	259	15	2588.43	518.694	5	0	4	37.56
CGSLGNIHHKPGGGQVEVKSEK-K22-156	WT_Tau	-	monolink	343	n/a	-	2473.25	825.425	3	5	1	37.4
IGSTENLKHQPGGGK-K8-155	WT_Tau	-	monolink	267	n/a	-	1676.88	559.969	3	-1.8	13	37.31
KLDLSNVQSK-SEKLDFK-a1-b3	WT_Tau	WT_Tau	intra-protein xl	281	343	62	2134.15	534.545	4	-1.6	1	37.28
IGSLDNITHVPGGGNKKIETHK-K16-K17	WT_Tau	-	intralink	369	370	1	2452.3	614.084	4	-0.9	26	37.26
IGSTENLKHQPGGGK-KLDLSNVQSKCGSK-a8-b10	WT_Tau	WT_Tau	intra-protein xl	267	290	23	3222.66	806.674	4	-1.2	2	37.22
CGSLGNIHHKPGGGQVEVKSEKLDFK-K19-156	WT_Tau	-	monolink	340	n/a	-	2976.53	993.184	3	5	2	36.89
CGSLGNIHHKPGGGQVEVKSEKLDFK-K19-155	WT_Tau	-	monolink	340	n/a	-	2975.53	992.85	3	-1.4	2	36.87
SEKLDFKDR-K3-155	WT_Tau	-	monolink	343	n/a	-	1291.67	431.566	3	-3.6	4	36.8
VQSKIGSLDNITHVPGGGNK-LDFKDR-a4-b4	WT_Tau	WT_Tau	intra-protein xl	353	347	6	2950.55	591.117	5	-1.5	6	36.63
IGSLDNITHVPGGGNKK-SEKLDFKDR-a16-b7	WT_Tau	WT_Tau	intra-protein xl	369	347	22	2980.56	746.148	4	-0.7	3	36.33
IGSLDNITHVPGGGNKK-K17-155	WT_Tau	-	monolink	370	n/a	-	1861	621.342	3	-3.3	81	36.33
IGSTENLKHQPGGGK-VQIINKK-a8-b6	WT_Tau	WT_Tau	intra-protein xl	267	280	13	2501.4	501.287	5	-0.1	5	36.06
HVPGGGSVQIVYKPVDLSK-SEKLDFK-a13-b3	WT_Tau	WT_Tau	intra-protein xl	311	343	32	2982.61	746.659	4	0	1	35.8
DNIKHVPGGGSVQIVYKPVDLSK-VQIINKK-a4-b6	WT_Tau	WT_Tau	intra-protein xl	298	280	18	3428.94	572.497	6	-0.9	3	35.75
VQSKIGSLDNITHVPGGGNK-K4-156	WT_Tau	-	monolink	353	n/a	-	2176.15	726.392	3	1.3	29	35.73
KLDLSNVQSK-SKIGSTENLK-a1-b2	WT_Tau	WT_Tau	intra-protein xl	281	259	22	2344.28	587.079	4	-0.9	7	35.71
DNIKHVPGGGSVQIVYKPVDLSK-KLDLSNVQSKCGSK-a4-b10	WT_Tau	WT_Tau	intra-protein xl	298	290	8	4150.2	692.709	6	-1.2	1	35.7
KIETHK-LDFKDR-a1-b4	WT_Tau	WT_Tau	intra-protein xl	370	347	23	1684.91	422.236	4	-1.3	2	35.45
DNIKHVPGGGSVQIVYKPVDLSK-KLDLSNVQSK-a4-b1	WT_Tau	WT_Tau	intra-protein xl	298	281	17	3718.03	1240.35	3	0.8	3	35.24
VQSKIGSLDNITHVPGGGNK-KIETHK-a4-b1	WT_Tau	WT_Tau	intra-protein xl	353	370	17	2912.57	971.863	3	-1.7	6	35.23
CGSLGNIHHKPGGGQVEVK-SEKLDFKDR-a10-b3	WT_Tau	WT_Tau	intra-protein xl	331	343	12	3247.64	650.535	5	-1.7	5	35.09
VTSKCGSLGNIHHKPGGGQVEVK-K4-156	WT_Tau	-	monolink	321	n/a	-	2544.31	637.085	4	-1	68	34.98
HVPGGGSVQIVYKPVDLSKVTSK-K13-156	WT_Tau	-	monolink	311	n/a	-	2550.41	511.089	5	-0.1	10	34.71
CGSLGNIHHKPGGGQVEVKSEK-LDFKDR-a19-b4	WT_Tau	WT_Tau	intra-protein xl	340	347	7	3247.64	650.535	5	-0.8	2	34.67
SKIGSTENLK-VQIINKK-a2-b6	WT_Tau	WT_Tau	intra-protein xl	259	280	21	2055.19	514.806	4	-1.4	2	34.59
VQSKIGSLDNITHVPGGGNKK-LDFKDR-a4-b4	WT_Tau	WT_Tau	intra-protein xl	353	347	6	3078.64	514.115	6	-2	3	34.58
CGSLGNIHHKPGGGQVEVKSEKLDFK-K10-K22	WT_Tau	-	intralink	331	343	12	2958.5	740.633	4	-0.4	2	34.52
KLDLSNVQSKCGSK-HQPGGGKVQIINK-a10-b7	WT_Tau	WT_Tau	intra-protein xl	290	274	16	3075.64	616.137	5	-1.7	1	34.46
IGSTENLKHQPGGGK-K8-156	WT_Tau	-	monolink	267	n/a	-	1677.87	560.297	3	-1.1	6	34.39
IGSLDNITHVPGGGNKK-IGSTENLKHQPGGGK-a16-b8	WT_Tau	WT_Tau	intra-protein xl	369	267	102	3365.77	842.45	4	-0.6	1	34.38
HQPGGGKVQIINKK-K7-155	WT_Tau	-	monolink	274	n/a	-	1657.96	553.662	3	-1.8	1	34.3
LDLSNVQSKCGSKDNIK-K9-156	WT_Tau	-	monolink	290	n/a	-	2061.04	688.021	3	-0.8	3	34.27
SKIGSTENLK-LDFKDR-a2-b4	WT_Tau	WT_Tau	intra-protein xl	259	347	88	2006.07	669.697	3	-0.6	1	34.24
VTSKCGSLGNIHHKPGGGQVEVK-K4-K14	WT_Tau	-	intralink	321	331	10	2526.3	632.583	4	-0.9	48	33.98
VQSKIGSLDNITHVPGGGNKK-K4-155	WT_Tau	-	monolink	353	n/a	-	2303.26	576.822	4	-1.7	9	33.93
VTSKCGSLGNIHHKPGGGQVEVK-SEKLDFKDR-a4-b3	WT_Tau	WT_Tau	intra-protein xl	321	343	22	3662.88	916.729	4	0	1	33.82
IGSLDNITHVPGGGNKK-SKIGSTENLK-a16-b2	WT_Tau	WT_Tau	intra-protein xl	369	259	110	2919.56	730.899	4	-0.7	1	33.76
HVPGGGSVQIVYKPVDLSK-VQIINKK-a13-b6	WT_Tau	WT_Tau	intra-protein xl	311	280	31	2958.69	592.745	5	-1	1	33.49
CGSLGNIHHKPGGGQVEVKSEK-K10-156	WT_Tau	-	monolink	331	n/a	-	2473.24	825.421	3	0	2	33.48
CGSKDNIK-K4-156	WT_Tau	-	monolink	294	n/a	-	1076.52	359.846	3	-1.4	1	33.38
DRVQSKIGSLDNITHVPGGGNK-K6-156	WT_Tau	-	monolink	353	n/a	-	2447.27	612.826	4	-1.5	1	33.24
CGSLGNIHHKPGGGQVEVKSEKLDFK-K19-K22	WT_Tau	-	intralink	340	343	3	2958.5	987.174	3	-0.9	2	33.24
CGSLGNIHHKPGGGQVEVK-VQIINKK-a10-b6	WT_Tau	WT_Tau	intra-protein xl	331	280	51	2952.59	739.156	4	-1	3	33.21
DRVQSKIGSLDNITHVPGGGNK-K6-155	WT_Tau	-	monolink	353	n/a	-	2446.29	612.581	4	-1.3	1	33.16
VQSKIGSLDNITHVPGGGNK-IGSTENLKHQPGGGK-a4-b8	WT_Tau	WT_Tau	intra-protein xl	353	267	86	3679.92	920.989	4	-1.5	1	33
SEKLDFK-KIETHK-a3-b1	WT_Tau	WT_Tau	intra-protein xl	343	370	27	1757.95	352.598	5	-1.8	4	32.75
IGSLDNITHVPGGGNKK-LDFKDR-a16-b4	WT_Tau	WT_Tau	intra-protein xl	369	347	22	2636.39	528.286	5	-1.2	2	32.72
SEKLDFK-VQIINKK-a3-b6	WT_Tau	WT_Tau	intra-protein xl	343	280	63	1845.06	462.273	4	-0.7	2	32.62
HVPGGGSVQIVYKPVDLSK-KLDLSNVQSK-a13-b1	WT_Tau	WT_Tau	intra-protein xl	311	281	30	3247.78	650.565	5	0.7	2	32.59
IGSLDNITHVPGGGNKK-SEKLDFK-a16-b3	WT_Tau	WT_Tau	intra-protein xl	369	343	26	2709.43	542.894	5	-1.1	4	32.52
KLDLSNVQSK-K10-155	WT_Tau	-	monolink	290	n/a	-	1285.72	429.582	3	-2.8	1	32.48
CGSKDNIK-SEKLDFK-a4-b3	WT_Tau	WT_Tau	intra-protein xl	294	343	49	1923.96	642.327	3	-1.9	1	32.41
LDLSNVQSKCGSK-SKIGSTENLK-a9-b2	WT_Tau	WT_Tau	intra-protein xl	290	259	31	2648.37	663.1	4	-0.6	2	32.4
VTSKCGSLGNIHHKPGGGQVEVK-CGSKDNIK-a4-b4	WT_Tau	WT_Tau	intra-protein xl	321	294	27	3446.74	862.692	4	-0.6	1	32.4
IGSTENLKHQPGGGK-KIETHK-a8-b1	WT_Tau	WT_Tau	intra-protein xl	267	370	103	2414.29	805.77	3	-2.5	2	32.29
VTSKCGSLGNIHHKPGGGQVEVK-VQIINKK-a4-b6	WT_Tau	WT_Tau	intra-protein xl	321	280	41	3367.84	842.967	4	-0.7	1	31.34
SEKLDFKDR-K3-156	WT_Tau	-	monolink	343	n/a	-	1292.66	431.894	3	-2.4	6	30.84
HVPGGGSVQIVYKPVDLSKVTSK-K13-K23	WT_Tau	-	intralink	311	321	10	2532.39	845.138	3	-1.3	7	30.79
VTSKCGSLGNIHHKPGGGQVEVK-SEKLDFK-a4-b3	WT_Tau	WT_Tau	intra-protein xl	321	343	22	3391.75	848.946	4	-1.4	4	30.64
VTSKCGSLGNIHHKPGGGQVEVK-SEKLDFKDR-a4-b7	WT_Tau	WT_Tau	intra-protein xl	321	347	26	3662.89	1221.97	3	1	1	30.58
HVPGGGSVQIVYKPVDLSK-CGSKDNIK-a13-b4	WT_Tau	WT_Tau	intra-protein xl	311	294	17	3037.59	760.405	4	-0.8	3	30.45
VQSKIGSLDNITHVPGGGNK-K4-K20	WT_Tau	-	intralink	353	369	16	2158.14	720.387	3	-0.2	10	30.12
LDLSNVQSKCGSK-KIETHK-a9-b1	WT_Tau	WT_Tau	intra-protein xl	290	370	80	2327.21	776.746	3	-0.7	1	30.1
CGSLGNIHHKPGGGQVEVK-IGSLDNITHVPGGGNKK-a10-b16	WT_Tau	WT_Tau	intra-protein xl	331	369	38	3816.97	955.249	4	-1.3	4	29.91
VQSKIGSLDNITHVPGGGNKK-K4-K20	WT_Tau	-	intralink	353	369	16	2286.23	763.085	3	-0.1	8	29.91
VQSKIGSLDNITHVPGGGNK-SKIGSTENLK-a4-b2	WT_Tau	WT_Tau	intra-protein xl	353	259	94	3233.73	1078.92	3	0.7	1	29.77
IGSTENLKHQPGGGK-CGSKDNIK-a8-b4	WT_Tau	WT_Tau	intra-protein xl	267	294	27	2580.29	861.105	3	-1.4	3	29.75
SKIGSTENLK-SEKLDFK-a2-b3	WT_Tau	WT_Tau	intra-protein xl	259	343	84	2079.11	520.784	4	-1.6	1	29.61
CGSLGNIHHKPGGGQVEVKSEK-K10-K19	WT_Tau	-	intralink	331	340	9	2455.23	819.417	3	-0.4	31	29.36
VQIINKK-KIETHK-a6-b1	WT_Tau	WT_Tau	intra-protein xl	280	370	90	1734.04	579.021	3	-1.2	2	29.35
VTSKCGSLGNIHHKPGGGQVEVK-SKIGSTENLK-a4-b2	WT_Tau	WT_Tau	intra-protein xl	321	259	62	3601.88	1201.64	3	-1.3	3	28.95
HVPGGGSVQIVYKPVDLSK-LDFKDR-a13-b4	WT_Tau	WT_Tau	intra-protein xl	311	347	36	2909.57	582.921	5	0.3	1	28.85
HVPGGGSVQIVYKPVDLSK-INDKSGCK-a13-b4	WT_Tau	reverse_WT_Tau	intra-protein xl	311	148	163	3037.59	608.525	5	-1.1	1	28.81
CGSLGNIHHKPGGGQVEVK-HVPGGGSVQIVYKPVDLSK-a10-b13	WT_Tau	WT_Tau	intra-protein xl	331	311	20	4090.14	819.036	5	-0.4	5	28.47
KIETHKLTFR-K1-K6	WT_Tau	-	intralink	370	375	5	1409.8	470.942	3	-1.3	2	27.79
HVPGGGSVQIVYKPVDLSKVTSK-LDFKDR-a19-b4	WT_Tau	WT_Tau	intra-protein xl	317	347	30	3324.81	665.97	5	0.6	1	27.48
HQPGGGKVQIINKK-SKIGSTENLK-a7-b2	WT_Tau	WT_Tau	intra-protein xl	274	259	15	2716.53	906.517	3	1.4	1	27.37
CGSLGNIHHKPGGGQVEVKSEK-VQSKIGSLDNITHVPGGGNK-a19-b4	WT_Tau	WT_Tau	intra-protein xl	340	353	13	4475.29	896.066	5	-1.8	1	27.18
DNIKHVPGGGSVQIVYKPVDLSK-SEKLDFK-a4-b3	WT_Tau	WT_Tau	intra-protein xl	298	343	45	3452.85	864.221	4	-0.7	1	27.04
IGSLDNITHVPGGGNKK-VQIINKK-a16-b6	WT_Tau	WT_Tau	intra-protein xl	369	280	89	2685.51	896.18	3	-0.9	1	26.85
HQPGGGKVQIINKK-K7-156	WT_Tau	-	monolink	274	n/a	-	1658.94	553.989	3	-1.8	2	26.8
DNIKHVPGGGSVQIVYKPVDLSK-LDLSNVQSKCGSK-a4-b9	WT_Tau	WT_Tau	intra-protein xl	298	290	8	4022.11	805.43	5	-0.6	1	26.72
DNIKHVPGGGSVQIVYKPVDLSK-IGSTENLKHQPGGGK-a4-b8	WT_Tau	WT_Tau	intra-protein xl	298	267	31	4109.19	1028.31	4	-0.6	3	26.69
CGSLGNIHHKPGGGQVEVK-KIETHK-a10-b1	WT_Tau	WT_Tau	intra-protein xl	331	370	39	2865.48	717.378	4	-4.1	1	26.53
VTSKCGSLGNIHHKPGGGQVEVK-K4-K23	WT_Tau	-	intralink	321	340	19	2526.3	632.582	4	-1.5	9	26.3
CGSKDNIKHVPGGGSVQIVYKPVDLSK-K4-156	WT_Tau	-	monolink	294	n/a	-	3037.59	608.526	5	-0.4	11	26.29
CGSLGNIHHKPGGGQVEVK-IGSTENLKHQPGGGK-a10-b8	WT_Tau	WT_Tau	intra-protein xl	331	267	64	3632.84	909.219	4	-1.5	1	26.18
HQPGGGKVQIINK-CGSKDNIK-a7-b4	WT_Tau	WT_Tau	intra-protein xl	274	294	20	2433.27	812.099	3	-2.3	2	26.06
DNIKHVPGGGSVQIVYKPVDLSK-K4-K17	WT_Tau	-	intralink	298	311	13	2587.4	863.474	3	-0.8	10	25.76
VQSKIGSLDNITHVPGGGNK-LDLSNVQSKCGSK-a4-b9	WT_Tau	WT_Tau	intra-protein xl	353	290	63	3592.85	899.22	4	-0.9	2	25.7
NVKSKIGSTENLK-K5-156	WT_Tau	-	monolink	259	n/a	-	1572.87	394.225	4	-2.6	1	25.36
VQSKIGSLDNITHVPGGGNK-CGSLGNIHHKPGGGQVEVK-a4-b10	WT_Tau	WT_Tau	intra-protein xl	353	331	22	4131.13	1033.79	4	-0.5	2	25.35
HVPGGGSVQIVYKPVDLSKVTSK-KLDLSNVQSK-a19-b1	WT_Tau	WT_Tau	intra-protein xl	317	281	36	3663.02	733.612	5	-0.9	4	25.1
VTSKCGSLGNIHHKPGGGQVEVKSEK-K4-K23	WT_Tau	-	intralink	321	340	19	2870.47	957.83	3	-1.6	4	24.63
VQSKIGSLDNITHVPGGGNK-HVPGGGSVQIVYKPVDLSK-a4-b13	WT_Tau	WT_Tau	intra-protein xl	353	311	42	4137.22	1035.31	4	-0.4	3	24.44
VTSKCGSLGNIHHKPGGGQVEVK-K14-156	WT_Tau	-	monolink	331	n/a	-	2544.31	637.085	4	-1	14	24.43
HQPGGGKVQIINK-K7-K13	WT_Tau	-	intralink	274	280	6	1512.84	505.288	3	-0.6	3	24.43
CGSLGNIHHKPGGGQVEVKSEK-VQIINKK-a19-b6	WT_Tau	WT_Tau	intra-protein xl	340	280	60	3296.76	825.198	4	-1.3	1	24
NIIQVKGGGPQHK-K6-K13	reverse_WT_Tau	-	intralink	168	175	7	1512.84	505.287	3	-2.7	3	23.77
VQIINKKLDLSNVQSK-K16-156	WT_Tau	-	monolink	290	n/a	-	1982.14	496.543	4	0.2	2	23.52
IGSTENLKHQPGGGK-K8-K15	WT_Tau	-	intralink	267	274	7	1659.86	554.294	3	-0.1	6	23.39
VQSKIGSLDNITHVPGGGNKK-K4-K21	WT_Tau	-	intralink	353	370	17	2286.23	763.085	3	-0.9	1	23.36
SKIGSTENLKHQPGGGK-K2-K10	WT_Tau	-	intralink	259	267	8	1874.98	626.002	3	-0.7	10	23.34
VTSKCGSLGNIHHKPGGGQVEVK-KLDLSNVQSK-a4-b1	WT_Tau	WT_Tau	intra-protein xl	321	281	40	3656.93	915.241	4	0.5	1	23.21
DGSKPPEGSSPPTKPAPPTK-HVPGGGSVQIVYKPVDLSK-a14-b13	reverse_WT_Tau	WT_Tau	intra-protein xl	262	311	49	4091.14	819.236	5	-4.6	3	23.17
VQIINKKLDLSNVQSK-K7-156	WT_Tau	-	monolink	281	n/a	-	1982.14	661.722	3	0.1	1	23.12
HVPGGGSVQIVYKPVDLSKVTSK-SEKLDFK-a19-b3	WT_Tau	WT_Tau	intra-protein xl	317	343	26	3397.85	680.577	5	-0.7	1	23.09
SEKLDFKDR-KIETHK-a7-b1	WT_Tau	WT_Tau	intra-protein xl	347	370	23	2029.08	508.278	4	-1.7	1	23.03
SKIGSTENLKHQPGGGK-K10-156	WT_Tau	-	monolink	267	n/a	-	1892.99	632.006	3	-0.4	2	22.75
LDFKDRVQSK-K4-156	WT_Tau	-	monolink	347	n/a	-	1390.74	464.589	3	-1.7	1	22.53
DNIKHVPGGGSVQIVYKPVDLSK-SKIGSTENLK-a4-b2	WT_Tau	WT_Tau	intra-protein xl	298	259	39	3662.99	733.605	5	-0.4	2	22.52
IGSLDNITHVPGGGNKK-SEKLDFKDR-a16-b3	WT_Tau	WT_Tau	intra-protein xl	369	343	26	2980.56	597.12	5	-0.9	1	22.48
IGSTENLKHQPGGGK-SQVNSLDLKK-a8-b9	WT_Tau	reverse_WT_Tau	intra-protein xl	267	161	106	2790.48	559.104	5	-1.7	5	22.35
HVPGGGSVQIVYKPVDLSK-SEKLDFKDR-a13-b7	WT_Tau	WT_Tau	intra-protein xl	311	347	36	3253.73	814.441	4	-1.1	1	21.9
KIETHKLTFR-K1-156	WT_Tau	-	monolink	370	n/a	-	1427.81	476.945	3	-1.9	1	21.78
VQSKIGSLDNITHVPGGGNK-SQVNSLDLKK-a4-b9	WT_Tau	reverse_WT_Tau	intra-protein xl	353	161	192	3288.77	823.199	4	-0.7	2	21.7
SEKLDFKDR-K7-156	WT_Tau	-	monolink	347	n/a	-	1292.66	431.894	3	-2.4	2	21.65
HVPGGGSVQIVYKPVDLSKVTSKCGSLGNIHHKPGGGQVEVK-K33-K42	WT_Tau	-	intralink	331	340	9	4487.37	748.903	6	-0.6	1	21.1
CGSKDNIKHVPGGGSVQIVYKPVDLSK-K8-156	WT_Tau	-	monolink	298	n/a	-	3037.59	608.525	5	-1.3	3	20.78
DNIKHVPGGGSVQIVYKPVDLSK-HQPGGGKVQIINK-a4-b7	WT_Tau	WT_Tau	intra-protein xl	298	274	24	3962.17	991.551	4	-0.8	2	20.57
DGSKPPEGSSPPTKPAPPTK-IGSLDNITHVPGGGNKK-a14-b16	reverse_WT_Tau	WT_Tau	intra-protein xl	262	369	107	3817.97	955.499	4	-5	2	20.12
VTSKCGSLGNIHHKPGGGQVEVK-HVPGGGSVQIVYKPVDLSK-a4-b13	WT_Tau	WT_Tau	intra-protein xl	321	311	10	4505.38	1127.35	4	-0.3	4	20.01
YVIEAGHDTKAK-AKANER-a10-b2	reverse_WT_Tau	reverse_WT_Tau	intra-protein xl	57	59	2	2156.12	719.713	3	-3.1	1	19.83
DNIKHVPGGGSVQIVYKPVDLSK-DGSKPPEGSSPPTKPAPPTK-a4-b4	WT_Tau	reverse_WT_Tau	intra-protein xl	298	252	46	4561.4	1141.36	4	-2.6	1	19.54
SKIGSTENLK-SQVNSLDLKK-a2-b9	WT_Tau	reverse_WT_Tau	intra-protein xl	259	161	98	2344.28	782.436	3	-0.6	3	19.33
GDAGKAK-GDAGKAK-a5-b5	reverse_WT_Tau	reverse_WT_Tau	intra-protein xl	299	299	0	1428.76	477.261	3	2.3	2	19.08
DGSKPPEGSSPPTKPAPPTK-HQPGGGKVQIINK-a4-b7	reverse_WT_Tau	WT_Tau	intra-protein xl	252	274	22	3486.83	872.716	4	-4.4	2	19.02
DGSKPPEGSSPPTKPAPPTK-KLDLSNVQSKCGSK-a4-b10	reverse_WT_Tau	WT_Tau	intra-protein xl	252	290	38	3674.86	919.724	4	-4.7	1	18.98
DGSKPPEGSSPPTKPAPPTK-SEKLDFK-a4-b3	reverse_WT_Tau	WT_Tau	intra-protein xl	252	343	91	2977.51	993.513	3	-4.7	1	18.23
SQVNSLDLKK-CGSKDNIK-a9-b4	reverse_WT_Tau	WT_Tau	intra-protein xl	161	294	133	2189.14	730.72	3	-0.2	6	18.02
VTSKCGSLGNIHHKPGGGQVEVK-VQSKIGSLDNITHVPGGGNK-a4-b4	WT_Tau	WT_Tau	intra-protein xl	321	353	32	4546.37	758.736	6	-0.7	2	17.96
CGSLGNIHHKPGGGQVEVK-SEKLDFKDR-a10-b7	WT_Tau	WT_Tau	intra-protein xl	331	347	16	3247.64	812.917	4	-0.7	3	17.95
KLDLSNVQSKCGSK-LNETSGIKSKVNK-a1-b8	WT_Tau	reverse_WT_Tau	intra-protein xl	281	183	98	3117.66	520.618	6	-2.4	1	17.8
HVPGGGSVQIVYKPVDLSK-K19-155	WT_Tau	-	monolink	317	n/a	-	2134.18	712.4	3	-1.3	4	17.71
GDAGKAKK-GDAGKAKK-a5-b5	reverse_WT_Tau	reverse_WT_Tau	intra-protein xl	299	299	0	1684.95	422.245	4	1.1	1	17.24
GGGPQHKLNETSGIKSK-K7-K15	reverse_WT_Tau	-	intralink	175	183	8	1874.98	626.002	3	-0.7	1	17.23
DGSKPPEGSSPPTKPAPPTK-IGSLDNITHVPGGGNKK-a4-b16	reverse_WT_Tau	WT_Tau	intra-protein xl	252	369	117	3817.97	955.501	4	-3.7	3	17.16
VQSKIGSLDNITHVPGGGNKK-SEKLDFK-a4-b3	WT_Tau	WT_Tau	intra-protein xl	353	343	10	3151.68	788.929	4	-1.2	1	17.11
CGSLGNIHHKPGGGQVEVKSEK-IGSLDNITHVPGGGNKK-a19-b16	WT_Tau	WT_Tau	intra-protein xl	340	369	29	4161.13	1041.29	4	-1.1	1	17.1
HVPGGGSVQIVYKPVDLSK-K19-156	WT_Tau	-	monolink	317	n/a	-	2135.16	712.728	3	-0.8	10	16.76
IGSLDNITHVPGGGNKK-HQPGGGKVQIINK-a16-b7	WT_Tau	WT_Tau	intra-protein xl	369	274	95	3218.75	805.695	4	-0.7	5	16.56
HVPGGGSVQIVYKPVDLSK-IGSLDNITHVPGGGNKK-a13-b16	WT_Tau	WT_Tau	intra-protein xl	311	369	58	3823.06	956.773	4	-0.6	1	16.39
YVIEAGHDTKAK-MVSKSK-a10-b4	reverse_WT_Tau	WT_Tau	intra-protein xl	57	130	73	2147.12	716.715	3	-3.4	1	16.34
DKFDLK-MVSKSK-a2-b4	reverse_WT_Tau	WT_Tau	intra-protein xl	95	130	35	1580.86	527.96	3	4.3	1	16.33
SKVNKLDPMPVPATQLR-INDKSGCK-a2-b4	reverse_WT_Tau	reverse_WT_Tau	intra-protein xl	185	148	37	2951.55	591.318	5	-2.5	2	15.81
SKIGSTENLKHQPGGGK-K2-K17	WT_Tau	-	intralink	259	274	15	1874.98	626.002	3	-0.7	1	15.78
GGGPQHKLNETSGIK-NVKSKIGSTENLK-a7-b5	reverse_WT_Tau	WT_Tau	intra-protein xl	175	259	84	3076.66	1026.56	3	2.5	2	15.78
KLDLSNVQSKCGSK-K1-K14	WT_Tau	-	intralink	281	294	13	1700.88	567.967	3	-0.1	3	15.72
SKASSPSKPPTR-KIETHK-a2-b1	reverse_WT_Tau	WT_Tau	intra-protein xl	202	370	168	2134.18	712.401	3	2.8	12	15.67
VQIINKKLDLSNVQSK-INDKSGCK-a7-b4	WT_Tau	reverse_WT_Tau	intra-protein xl	281	148	133	2884.57	722.151	4	0.9	1	15.65
HVPGGGSVQIVYKPVDLSK-SKIGSTENLK-a13-b2	WT_Tau	WT_Tau	intra-protein xl	311	259	52	3192.74	1065.25	3	-0.6	1	15.6
DNIKHVPGGGSVQIVYKPVDLSKVTSK-K4-K23	WT_Tau	-	intralink	298	317	19	3002.64	751.669	4	-0.4	1	15.4
HVPGGGSVQIVYKPVDLSK-KLDLSNVQSKCGSK-a13-b10	WT_Tau	WT_Tau	intra-protein xl	311	290	21	3679.96	920.997	4	-1	1	15.28
VTSKCGSLGNIHHKPGGGQVEVKSEK-K14-156	WT_Tau	-	monolink	331	n/a	-	2888.48	963.835	3	0.4	2	15.25
KNIIQVKGGGPQHK-K1-K14	reverse_WT_Tau	-	intralink	162	175	13	1640.94	547.987	3	0.1	3	15.17
TPPKSPSSAK-ENAKAK-a4-b4	WT_Tau	WT_Tau	intra-protein xl	234	383	149	1795.97	450	4	0.9	1	15.14
GGGPQHKLNETSGIK-K7-K15	reverse_WT_Tau	-	intralink	175	183	8	1659.86	554.293	3	-1.3	3	15.14
GAAPPGQKGQANATR-STVKSLDVPK-a8-b4	WT_Tau	reverse_WT_Tau	intra-protein xl	163	125	38	2633.41	878.81	3	-2.2	1	14.84
HVPGGGSVQIVYKPVDLSKVTSK-DGSKPPEGSSPPTKPAPPTK-a19-b14	WT_Tau	reverse_WT_Tau	intra-protein xl	317	262	55	4506.39	752.072	6	-3.1	1	14.8
HQPGGGKVQIINK-SQVNSLDLKK-a7-b9	WT_Tau	reverse_WT_Tau	intra-protein xl	274	161	113	2643.47	661.875	4	-1.2	1	14.73
KNGGGPVHTINDLSGIK-K1-K17	reverse_WT_Tau	-	intralink	73	89	16	1843.98	615.667	3	-0.9	3	14.54
TANAQGKQGPPAAGRPTAIK-FDLKESK-a7-b4	reverse_WT_Tau	reverse_WT_Tau	intra-protein xl	279	99	180	2936.57	735.15	4	-1.7	1	14.51
CGSLGNIHHKPGGGQVEVK-K10-K19	WT_Tau	-	intralink	331	340	9	2111.06	528.773	4	1.4	26	14.37
IGSTENLKHQPGGGK-SEKLDFK-a8-b3	WT_Tau	WT_Tau	intra-protein xl	267	343	76	2525.31	506.07	5	0.1	3	14.26
KLDLSNVQSKCGSK-NVKSKIGSTENLK-a10-b3	WT_Tau	WT_Tau	intra-protein xl	290	257	33	3117.66	624.54	5	-2.7	12	14.22
IGSLDNITHVPGGGNKK-KNIIQVK-a16-b1	WT_Tau	reverse_WT_Tau	intra-protein xl	369	162	207	2685.51	896.18	3	-0.9	1	14.22
CGSLGNIHHKPGGGQVEVK-HQPGGGKVQIINK-a10-b7	WT_Tau	WT_Tau	intra-protein xl	331	274	57	3485.83	1162.95	3	-1.5	1	14.07
HVPGGGSVQIVYKPVDLSKVTSK-CGSLGNIHHKPGGGQVEVK-a19-b10	WT_Tau	WT_Tau	intra-protein xl	317	331	14	4505.39	1127.35	4	0	2	14.06
HVPGGGSVQIVYKPVDLSK-IGSTENLKHQPGGGK-a13-b8	WT_Tau	WT_Tau	intra-protein xl	311	267	44	3638.94	910.743	4	-0.7	2	14.02
GDAGKAKK-AKGADGK-a5-b2	reverse_WT_Tau	WT_Tau	intra-protein xl	299	143	156	1556.85	390.221	4	1	1	13.74
LNETSGIKSKVNK-SKSVXR-a8-b2	reverse_WT_Tau	reverse_WT_Tau	intra-protein xl	183	312	129	2277.23	456.454	5	-3.3	1	13.71
HVPGGGSVQIVYKPVDLSKVTSK-KLDLSNVQSK-a13-b1	WT_Tau	WT_Tau	intra-protein xl	311	281	30	3663.02	916.763	4	-0.7	1	13.65
VQSKIGSLDNITHVPGGGNK-HQPGGGKVQIINK-a4-b7	WT_Tau	WT_Tau	intra-protein xl	353	274	79	3532.91	884.235	4	-1.3	1	13.62
HQPGGGKVQIINKK-K7-K13	WT_Tau	-	intralink	274	280	6	1640.93	547.986	3	-0.8	1	13.62
VTSKCGSLGNIHHKPGGGQVEVKSEK-K4-156	WT_Tau	-	monolink	321	n/a	-	2888.48	963.835	3	0.4	2	13.6
NGGGPVHTINDLSGIKSQVR-K16-155	reverse_WT_Tau	-	monolink	89	n/a	-	2203.16	551.798	4	-4.6	2	13.47
LDPXPVPATQLRSKASSPSKPPTR-ESKVEVQGGGPK-a14-b3	reverse_WT_Tau	reverse_WT_Tau	intra-protein xl	202	102	100	3928.08	983.027	4	1	1	13.35
VEVQGGGPKHHINGLSGCK-K9-K19	reverse_WT_Tau	-	intralink	111	121	10	2111.06	704.693	3	-1.1	18	13.29
HVPGGGSVQIVYKPVDLSKVTSK-CGSKDNIK-a19-b4	WT_Tau	WT_Tau	intra-protein xl	317	294	23	3452.84	864.217	4	1.2	1	13.18
TANAQGKQGPPAAGRPTAIK-TPPAPKTPPSSGEPPK-a7-b6	reverse_WT_Tau	WT_Tau	intra-protein xl	279	180	99	3657.93	732.594	5	-4.3	1	13.06
TPPAPKTPPSSGEPPK-KIETHK-a6-b1	WT_Tau	WT_Tau	intra-protein xl	180	370	190	2479.33	827.45	3	-2	1	12.98
CGSLGNIHHKPGGGQVEVKSEK-K22-155	WT_Tau	-	monolink	343	n/a	-	2472.25	619.071	4	-1.8	3	12.94
HVPGGGSVQIVYKPVDLSKVTSK-DGSKPPEGSSPPTKPAPPTK-a19-b4	WT_Tau	reverse_WT_Tau	intra-protein xl	317	252	65	4506.39	902.285	5	-3.2	2	12.93
VEVQGGGPKHHINGLSGCK-K19-155	reverse_WT_Tau	-	monolink	121	n/a	-	2128.08	533.028	4	-2.2	1	12.82
VTSKCGSLGNIHHKPGGGQVEVK-K23-156	WT_Tau	-	monolink	340	n/a	-	2544.31	509.87	5	-0.7	1	12.78
HVPGGGSVQIVYKPVDLSKVTSK-K23-156	WT_Tau	-	monolink	321	n/a	-	2550.41	851.143	3	-0.1	4	12.76
VEVQGGGPKHHINGLSGCK-K9-155	reverse_WT_Tau	-	monolink	111	n/a	-	2128.08	533.028	4	-2.2	2	12.63
DNIKHVPGGGSVQIVYKPVDLSKVTSK-K23-156	WT_Tau	-	monolink	317	n/a	-	3020.65	605.139	5	-0.3	1	12.53
KLDLSNVQSK-K1-K10	WT_Tau	-	intralink	281	290	9	1268.69	423.906	3	-2	1	12.42
IGSLDNITHVPGGGNKKIETHK-K17-156	WT_Tau	-	monolink	370	n/a	-	2470.32	824.446	3	-1.3	3	12.42
VEVQGGGPKHHINGLSGCKSTVK-K9-K19	reverse_WT_Tau	-	intralink	111	121	10	2526.3	632.582	4	-1.8	4	12.12
VTSKCGSLGNIHHKPGGGQVEVK-SQVNSLDLKK-a4-b9	WT_Tau	reverse_WT_Tau	intra-protein xl	321	161	160	3656.93	610.496	6	-1	2	12.02
DDSGTGDKSK-SKSVXR-a8-b2	reverse_WT_Tau	reverse_WT_Tau	intra-protein xl	310	312	2	1868.88	623.968	3	1	1	11.83
DRVQSKIGSLDNITHVPGGGNK-KLDLSNVQSK-a6-b1	WT_Tau	WT_Tau	intra-protein xl	353	281	72	3559.91	712.989	5	2.6	5	11.77
HVPGGGSVQIVYKPVDLSKVTSK-SKIGSTENLK-a19-b2	WT_Tau	WT_Tau	intra-protein xl	317	259	58	3607.97	1203.67	3	-2.3	1	11.36
SKASSPSKPPTR-HTEIKK-a2-b5	reverse_WT_Tau	reverse_WT_Tau	intra-protein xl	202	72	130	2134.18	712.4	3	1.4	6	11.32
CGSLGNIHHKPGGGQVEVKSEK-K19-K22	WT_Tau	-	intralink	340	343	3	2455.22	614.814	4	-1.6	2	11.29
TANAQGKQGPPAAGRPTAIKTK-LDFKDRVQSK-a7-b4	reverse_WT_Tau	WT_Tau	intra-protein xl	279	347	68	3534.93	707.994	5	0.8	1	11.26
CGSLGNIHHKPGGGQVEVKSEKLDFK-K10-155	WT_Tau	-	monolink	331	n/a	-	2975.53	596.113	5	-1.1	1	11.25
DNIKHVPGGGSVQIVYKPVDLSK-TKGDAGKAK-a4-b7	WT_Tau	reverse_WT_Tau	intra-protein xl	298	299	1	3461.89	866.48	4	0.3	2	11.11
AKKDDSGTGDK-IPAKTPPAPK-a3-b4	reverse_WT_Tau	WT_Tau	intra-protein xl	302	174	128	2277.23	570.315	4	3.1	1	10.8
VQSKIGSLDNITHVPGGGNK-LNETSGIKSK-a4-b8	WT_Tau	reverse_WT_Tau	intra-protein xl	353	183	170	3233.73	647.754	5	1.9	1	10.74
CGSLGNIHHKPGGGQVEVK-KPERTPPTPLSPTRSR-a10-b1	WT_Tau	reverse_WT_Tau	intra-protein xl	331	218	113	3930.06	787.02	5	-1	2	10.67
SLDVPKYVIQVSGGGPVHK-K6-156	reverse_WT_Tau	-	monolink	131	n/a	-	2135.17	712.732	3	4	16	10.62
HVPGGGSVQIVYKPVDLSK-SEKLDFKDR-a13-b3	WT_Tau	WT_Tau	intra-protein xl	311	343	32	3253.74	1085.59	3	0	1	10.62
YVIQVSGGGPVHKINDK-KLDLSNVQSK-a13-b1	reverse_WT_Tau	WT_Tau	intra-protein xl	144	281	137	3078.66	1027.23	3	-3	1	10.38
LGADTDGEQDQHMTYGGQDKRDGLGYTGAHDEMVEFEQRPEAM-VNKLDPXPVPATQLR-a20-b3	reverse_WT_Tau	reverse_WT_Tau	intra-protein xl	418	188	230	6616.05	1324.22	5	2.9	1	10.35
SQVNSLDLKK-INDKSGCK-a9-b4	reverse_WT_Tau	reverse_WT_Tau	intra-protein xl	161	148	13	2189.14	548.292	4	-0.1	2	10.33
VTSKCGSLGNIHHKPGGGQVEVKSEK-K4-K26	WT_Tau	-	intralink	321	343	22	2870.47	718.625	4	-0.8	1	10.33
SKIGSTENLKHQPGGGK-TPPKSPSSAKSR-a10-b4	WT_Tau	WT_Tau	intra-protein xl	267	234	33	3116.65	624.338	5	-1.7	1	10.27
HVPGGGSVQIVYKPVDLSKVTSK-DGSKPPEGSSPPTKPAPPTK-a13-b14	WT_Tau	reverse_WT_Tau	intra-protein xl	311	262	49	4506.38	1127.6	4	-4	1	10.21
IGSLDNITHVPGGGNKKIETHK-K16-K22	WT_Tau	-	intralink	369	375	6	2452.3	614.083	4	-1.9	2	10.2
KLDLSNVQSKCGSK-NVKSKIGSTENLK-a1-b3	WT_Tau	WT_Tau	intra-protein xl	281	257	24	3117.66	1040.23	3	-3	4	10.17
KLDLSNVQSK-INDKSGCK-a1-b4	WT_Tau	reverse_WT_Tau	intra-protein xl	281	148	133	2189.14	548.292	4	-0.1	1	10.01
TPPAPKTPPSSGEPPKSGDR-KVAVVRTPPK-a6-b1	WT_Tau	WT_Tau	intra-protein xl	180	225	45	3233.78	647.763	5	0.1	1	9.93
SKIGSTENLKHQPGGGK-LNETSGIKSK-a2-b8	WT_Tau	reverse_WT_Tau	intra-protein xl	259	183	76	2950.58	738.654	4	4.1	3	9.92
DRVQSKIGSLDNITHVPGGGNK-SQVNSLDLKK-a6-b9	WT_Tau	reverse_WT_Tau	intra-protein xl	353	161	192	3559.91	890.984	4	2.8	6	9.91
SKASSPSKPPTR-DGTGSDDKKAK-a2-b8	reverse_WT_Tau	WT_Tau	intra-protein xl	202	140	62	2500.28	834.435	3	1.6	1	9.9
TPPKSPSSAKSR-HTEIKK-a4-b5	WT_Tau	reverse_WT_Tau	intra-protein xl	234	72	162	2134.17	712.398	3	-1.6	2	9.87
KNGGGPVHTINDLSGIK-TPPAPKTPPSSGEPPK-a1-b6	reverse_WT_Tau	WT_Tau	intra-protein xl	73	180	107	3430.82	858.713	4	3	1	9.8
SKIGSTENLK-IETHKLTFR-a2-b5	WT_Tau	WT_Tau	intra-protein xl	259	375	116	2357.29	590.33	4	-3.6	1	9.8
IPAKTPPAPKTPPSSGEPPK-K10-K20	WT_Tau	-	intralink	180	190	10	2134.18	712.401	3	5	11	9.79
KIETHKLTFR-LNETSGIKSK-a1-b8	WT_Tau	reverse_WT_Tau	intra-protein xl	370	183	187	2485.38	829.468	3	-3.6	1	9.73
LGADTDGEQDQHXTYGGQDKRDGLGYTGAHDEMVEFEQRPEAM-VNKLDPMPVPATQLR-a20-b3	reverse_WT_Tau	reverse_WT_Tau	intra-protein xl	418	188	230	6616.04	1103.68	6	1.8	3	9.64
STVKSLDVPK-KIETHK-a4-b1	reverse_WT_Tau	WT_Tau	intra-protein xl	125	370	245	1965.11	656.046	3	-0.5	3	9.62
GAAPPGQKGQANATRIPAK-KAKGADGK-a8-b1	WT_Tau	WT_Tau	intra-protein xl	163	141	22	2743.52	686.888	4	3.6	1	9.6
VQSKIGSLDNITHVPGGGNKK-K20-156	WT_Tau	-	monolink	369	n/a	-	2304.24	577.068	4	-1.1	1	9.58
KNGGGPVHTINDLSGIKSQVR-K17-155	reverse_WT_Tau	-	monolink	89	n/a	-	2331.26	583.822	4	-4.8	2	9.5
GGGPQHKLNETSGIKSK-LNETSGIKSK-a7-b8	reverse_WT_Tau	reverse_WT_Tau	intra-protein xl	175	183	8	2950.59	738.654	4	4.7	4	9.45
SPSSAKSR-SKSVXR-a6-b2	WT_Tau	reverse_WT_Tau	intra-protein xl	240	312	72	1678.87	560.631	3	1.1	1	9.44
NGGGPVHTINDLSGIKSQVRDK-SQVNSLDLKK-a16-b9	reverse_WT_Tau	reverse_WT_Tau	intra-protein xl	89	161	72	3559.91	594.327	6	5	3	9.42
FDLKESKVEVQGGGPK-ASSPSKPPTR-a7-b6	reverse_WT_Tau	reverse_WT_Tau	intra-protein xl	102	208	106	2881.52	721.388	4	0.7	1	9.3
SQVNSLDLKK-SEKLDFK-a9-b3	reverse_WT_Tau	WT_Tau	intra-protein xl	161	343	182	2134.15	534.545	4	-1.6	1	9.28
DQGGYTXHQDQEGDTDAGLKESPLQTPTEDGSEEPGSETSDAK-LQTAPVPXPDLKNVKSK-a20-b12	WT_Tau	WT_Tau	intra-protein xl	44	254	210	6572.03	1315.41	5	2.3	2	9.28
FDLKESKVEVQGGGPK-K4-K7	reverse_WT_Tau	-	intralink	99	102	3	1854.97	619.332	3	-0.5	1	9.25
IPAKTPPAPKTPPSSGEPPK-K4-K20	WT_Tau	-	intralink	174	190	16	2134.18	712.4	3	4.2	6	9.23
LQTAPVPMPDLKNVK-NVKSKIGSTENLK-a12-b5	WT_Tau	WT_Tau	intra-protein xl	254	259	5	3204.79	1069.27	3	3.3	1	9.2
DQGGYTXHQDQEGDTDAGLKESPLQTPTEDGSEEPGSETSDAK-LQTAPVPXPDLKNVKSK-a20-b15	WT_Tau	WT_Tau	intra-protein xl	44	257	213	6572.03	1315.41	5	2.3	1	8.92
LQTAPVPXPDLKNVK-NVKSKIGSTENLK-a12-b5	WT_Tau	WT_Tau	intra-protein xl	254	259	5	3220.76	1074.6	3	-2.9	2	8.76
HHINGLSGCKSTVK-AKKDDSGTGDK-a10-b3	reverse_WT_Tau	reverse_WT_Tau	intra-protein xl	121	302	181	2795.37	932.799	3	-5	4	8.74
LDPMPVPATQLRSKASSPSKPPTR-AKANERFTLK-a20-b2	reverse_WT_Tau	reverse_WT_Tau	intra-protein xl	208	59	149	3875.11	776.03	5	0.4	2	8.59
GGGPQHKLNETSGIKSK-SKASSPSKPPTR-a15-b2	reverse_WT_Tau	reverse_WT_Tau	intra-protein xl	183	202	19	3116.66	780.173	4	0.5	3	8.54
GGGPQHKLNETSGIK-NVKSKIGSTENLK-a7-b3	reverse_WT_Tau	WT_Tau	intra-protein xl	175	257	82	3076.66	1026.56	3	2.5	1	8.52
VQIINKKLDLSNVQSK-SGCKSQVNSLDLK-a7-b4	WT_Tau	reverse_WT_Tau	intra-protein xl	281	152	129	3398.85	680.778	5	1.6	1	8.43
SLDVPKYVIQVSGGGPVHK-K6-155	reverse_WT_Tau	-	monolink	131	n/a	-	2134.18	712.4	3	-1.2	4	8.42
ANERFTLKHTEIK-VQIINKK-a8-b6	reverse_WT_Tau	WT_Tau	intra-protein xl	67	280	213	2565.47	856.163	3	0.6	2	8.38
LQTAPVPMPDLKNVKSK-FDLKESKVEVQGGGPK-a12-b4	WT_Tau	reverse_WT_Tau	intra-protein xl	254	99	155	3720.03	1241.02	3	4.4	1	8.38
ASSPSKPPTR-ENAKAK-a6-b4	reverse_WT_Tau	WT_Tau	intra-protein xl	208	383	175	1823.97	608.998	3	-1.7	1	8.37
KLDLSNVQSKCGSK-AKGADGKTK-a10-b7	WT_Tau	WT_Tau	intra-protein xl	290	148	142	2575.37	644.85	4	2	1	8.35
YVIQVSGGGPVHKINDKSGCK-ESKVEVQGGGPK-a13-b3	reverse_WT_Tau	reverse_WT_Tau	intra-protein xl	144	102	42	3593.85	899.471	4	0.6	1	8.34
TPPKSPSSAKSR-KIETHK-a4-b1	WT_Tau	WT_Tau	intra-protein xl	234	370	136	2134.18	712.401	3	1.6	5	8.33
SKIGSTENLKHQPGGGK-SKIGSTENLK-a10-b2	WT_Tau	WT_Tau	intra-protein xl	267	259	8	2950.59	738.654	4	4.7	2	8.31
TPPAPKTPPSSGEPPKSGDR-QGPPAAGRPTAIKTK-a16-b13	WT_Tau	reverse_WT_Tau	intra-protein xl	190	292	102	3631.92	1211.65	3	-2.3	6	8.29
DQGGYTMHQDQEGDTDAGLKESPLQTPTEDGSEEPGSETSDAK-SLDVPKYVIQVSGGGPVHK-a20-b6	WT_Tau	reverse_WT_Tau	intra-protein xl	44	131	87	6654.04	1110.01	6	-4.1	1	8.24
DGSKPPEGSSPPTKPAPPTK-K20-155	reverse_WT_Tau	-	monolink	268	n/a	-	2129.1	533.284	4	0.4	1	8.05
VEVQGGGPKHHINGLSGCKSTVK-HVPGGGSVQIVYKPVDLSK-a19-b13	reverse_WT_Tau	WT_Tau	intra-protein xl	121	311	190	4505.38	751.905	6	-0.5	1	8.02
TPPKSPSSAKSR-GADGKTK-a4-b5	WT_Tau	WT_Tau	intra-protein xl	234	148	86	2055.1	686.041	3	1.6	1	8.01
ESKVEVQGGGPKHHINGLSGCK-K3-K22	reverse_WT_Tau	-	intralink	102	121	19	2455.23	819.417	3	-0.3	7	8
DGSKPPEGSSPPTKPAPPTK-K4-155	reverse_WT_Tau	-	monolink	252	n/a	-	2129.1	710.709	3	0.7	2	7.97
VQSKIGSLDNITHVPGGGNKK-K20-155	WT_Tau	-	monolink	369	n/a	-	2303.26	768.76	3	-1.5	2	7.93
DGSKPPEGSSPPTKPAPPTKAPIR-DKFDLKESK-a20-b2	reverse_WT_Tau	reverse_WT_Tau	intra-protein xl	268	95	173	3657.93	610.664	6	2.4	1	7.88
AKTDHGAEIVYKSPVVSGDTSPR-IPAKTPPAPKTPPSSGEPPK-a2-b10	WT_Tau	WT_Tau	intra-protein xl	385	180	205	4547.37	910.482	5	-4.9	1	7.86
SGCKSQVNSLDLK-IPAKTPPAPK-a4-b4	reverse_WT_Tau	WT_Tau	intra-protein xl	152	174	22	2591.39	519.286	5	-3.9	1	7.84
GAAPPGQKGQANATRIPAK-SKASSPSKPPTR-a8-b8	WT_Tau	reverse_WT_Tau	intra-protein xl	163	208	45	3211.73	1071.58	3	-4.5	1	7.76
KNGGGPVHTINDLSGIK-K1-155	reverse_WT_Tau	-	monolink	73	n/a	-	1861	621.343	3	-1.7	1	7.6
IPAKTPPAPKTPPSSGEPPK-VQSKIGSLDNITHVPGGGNK-a4-b4	WT_Tau	WT_Tau	intra-protein xl	174	353	179	4154.24	1039.57	4	-0.1	7	7.58
FTLKHTEIK-LDFKDR-a4-b4	reverse_WT_Tau	WT_Tau	intra-protein xl	67	347	280	2046.12	683.049	3	3.7	1	7.55
DGSKPPEGSSPPTKPAPPTK-ANERFTLKHTEIK-a4-b8	reverse_WT_Tau	reverse_WT_Tau	intra-protein xl	252	67	185	3697.95	925.495	4	4.6	1	7.52
QEFEVMEDHAGTYGLGDRKDQGGYTMHQDQEGDTDAGLK-VQSKIGSLDNITHVPGGGNKK-a19-b4	WT_Tau	WT_Tau	intra-protein xl	24	353	329	6614.07	1323.82	5	-4.6	4	7.45
KLDLSNVQSK-LNETSGIKSK-a1-b8	WT_Tau	reverse_WT_Tau	intra-protein xl	281	183	98	2344.28	587.078	4	-1	1	7.45
TPPKSPSSAKSR-HTEIKK-a10-b5	WT_Tau	reverse_WT_Tau	intra-protein xl	240	72	168	2134.18	712.4	3	0.8	1	7.44
VQSKIGSLDNITHVPGGGNK-IGSLDNITHVPGGGNKK-a4-b16	WT_Tau	WT_Tau	intra-protein xl	353	369	16	3864.05	1289.02	3	-0.1	3	7.41
IGSTENLKHQPGGGKVQIINK-DDSGTGDKSKSVXR-a8-b10	WT_Tau	reverse_WT_Tau	intra-protein xl	267	312	45	3852.97	771.601	5	0.4	1	7.37
VNKLDPMPVPATQLRSK-KLDLSNVQSK-a3-b1	reverse_WT_Tau	WT_Tau	intra-protein xl	188	281	93	3161.74	633.356	5	-2.1	1	7.35
SKIGSTENLKHQPGGGK-SKASSPSKPPTR-a2-b2	WT_Tau	reverse_WT_Tau	intra-protein xl	259	202	57	3116.66	780.173	4	1	5	7.34
DRVQSKIGSLDNITHVPGGGNK-NVKSKIGSTENLK-a6-b5	WT_Tau	WT_Tau	intra-protein xl	353	259	94	3846.07	962.526	4	3.4	1	7.33
IPAKTPPAPKTPPSSGEPPK-K4-K10	WT_Tau	-	intralink	174	180	6	2134.18	712.4	3	4.7	6	7.32
YVIQVSGGGPVHKINDK-KIETHKLTFR-a13-b1	reverse_WT_Tau	WT_Tau	intra-protein xl	144	370	226	3219.78	1074.27	3	1.9	11	7.31
KLDLSNVQSKCGSK-LNETSGIKSKVNK-a10-b8	WT_Tau	reverse_WT_Tau	intra-protein xl	290	183	107	3117.66	1040.23	3	-2.2	2	7.3
SPSSAKSRLQTAPVPMPDLK-ASSPSKPPTRVVAVK-a6-b6	WT_Tau	reverse_WT_Tau	intra-protein xl	240	208	32	3770.06	943.524	4	-3.2	2	7.29
KIETHKLTFR-SQVRDKFDLK-a6-b6	WT_Tau	reverse_WT_Tau	intra-protein xl	375	95	280	2644.47	529.902	5	-0.2	2	7.15
DGSKPPEGSSPPTKPAPPTKAPIR-CGSKDNIK-a4-b4	reverse_WT_Tau	WT_Tau	intra-protein xl	252	294	42	3469.8	868.458	4	3.7	1	7.14
SRLQTAPVPXPDLKNVK-VNKLDPMPVPATQLR-a14-b3	WT_Tau	reverse_WT_Tau	intra-protein xl	254	188	66	3725.04	1242.69	3	0.9	1	7.12
LQTAPVPMPDLKNVK-AKTDHGAEIVYK-a12-b2	WT_Tau	WT_Tau	intra-protein xl	254	385	131	3118.66	1040.56	3	-3.2	1	7.11
IPAKTPPAPKTPPSSGEPPK-VNKLDPXPVPATQLRSK-a10-b3	WT_Tau	reverse_WT_Tau	intra-protein xl	180	188	8	4043.21	1348.74	3	-1.5	4	7.05
IGSLDNITHVPGGGNKKIETHK-K17-K22	WT_Tau	-	intralink	370	375	5	2452.3	491.468	5	-2.1	1	7.02
DGTGSDDKKAK-DKFDLKESK-a8-b2	WT_Tau	reverse_WT_Tau	intra-protein xl	140	95	45	2367.19	790.071	3	3.6	1	6.99
YVIQVSGGGPVHKINDK-FTLKHTEIK-a13-b4	reverse_WT_Tau	reverse_WT_Tau	intra-protein xl	144	67	77	3063.67	1022.23	3	-3.2	1	6.97
SKVNKLDPXPVPATQLR-VNKLDPMPVPATQLR-a5-b3	reverse_WT_Tau	reverse_WT_Tau	intra-protein xl	188	188	0	3725.03	1242.68	3	-2.8	1	6.92
YVIQVSGGGPVHKINDK-STVKSLDVPK-a13-b4	reverse_WT_Tau	reverse_WT_Tau	intra-protein xl	144	125	19	3020.65	756.17	4	-1.5	1	6.89
AKTDHGAEIVYKSPVVSGDTSPR-KLDLSNVQSKCGSK-a2-b1	WT_Tau	WT_Tau	intra-protein xl	385	281	104	4114.1	823.828	5	-0.2	1	6.88
YVIQVSGGGPVHKINDK-K17-155	reverse_WT_Tau	-	monolink	148	n/a	-	1965.07	656.031	3	-0.8	2	6.8
TDHGAEIVYKSPVVSGDTSPR-AKANERFTLK-a10-b2	WT_Tau	reverse_WT_Tau	intra-protein xl	395	59	336	3528.83	883.216	4	3.7	2	6.8
AKKDDSGTGDK-AKANERFTLK-a2-b2	reverse_WT_Tau	reverse_WT_Tau	intra-protein xl	301	59	242	2435.27	812.766	3	3.6	1	6.79
DGTGSDDKKAK-SKSVXR-a9-b2	WT_Tau	reverse_WT_Tau	intra-protein xl	141	312	171	1980.97	661.332	3	-2.8	1	6.68
ESKVEVQGGGPK-VVAVKKPER-a3-b5	reverse_WT_Tau	reverse_WT_Tau	intra-protein xl	102	217	115	2376.34	793.121	3	1	5	6.62
SKIGSTENLKHQPGGGK-TPPKSPSSAKSR-a2-b10	WT_Tau	WT_Tau	intra-protein xl	259	240	19	3116.66	780.173	4	1	2	6.58
QGPPAAGRPTAIKTKGDAGK-TPPSSGEPPKSGDR-a13-b10	reverse_WT_Tau	WT_Tau	intra-protein xl	292	190	102	3468.8	694.768	5	1.7	1	6.56
SLDVPKYVIQVSGGGPVHK-INDKSGCK-a6-b4	reverse_WT_Tau	reverse_WT_Tau	intra-protein xl	131	148	17	3037.59	608.525	5	-1.3	1	6.51
DGSKPPEGSSPPTKPAPPTK-HVPGGGSVQIVYKPVDLSK-a4-b13	reverse_WT_Tau	WT_Tau	intra-protein xl	252	311	59	4091.14	1023.79	4	-3.9	1	6.5
HVPGGGSVQIVYKPVDLSKVTSK-DGSKPPEGSSPPTKPAPPTK-a13-b4	WT_Tau	reverse_WT_Tau	intra-protein xl	311	252	59	4506.38	752.071	6	-5	1	6.45
IGSLDNITHVPGGGNKK-YVIEAGHDTKAK-a16-b10	WT_Tau	reverse_WT_Tau	intra-protein xl	369	57	312	3174.68	1059.23	3	4.5	1	6.39
LGADTDGEQDQHXTYGGQDKRDGLGYTGAHDEMVEFEQRPEAM-VNKLDPXPVPATQLR-a20-b3	reverse_WT_Tau	reverse_WT_Tau	intra-protein xl	418	188	230	6632.05	1106.35	6	4.1	3	6.35
VEVQGGGPKHHINGLSGCK-K9-156	reverse_WT_Tau	-	monolink	111	n/a	-	2129.07	533.275	4	-0.3	1	6.35
STVKSLDVPKYVIQVSGGGPVHK-K4-156	reverse_WT_Tau	-	monolink	125	n/a	-	2550.4	638.609	4	-0.7	1	6.27
LQTAPVPXPDLKNVK-SKASSPSKPPTR-a12-b8	WT_Tau	reverse_WT_Tau	intra-protein xl	254	208	46	3045.65	1016.23	3	0	2	6.26
ESKVEVQGGGPK-EPKKVAVVR-a3-b3	reverse_WT_Tau	WT_Tau	intra-protein xl	102	224	122	2376.33	793.118	3	-2.9	1	6.25
TANAQGKQGPPAAGRPTAIKTK-SKDGTGSDDKK-a20-b10	reverse_WT_Tau	WT_Tau	intra-protein xl	292	140	152	3436.8	1146.61	3	3.9	1	6.24
IGSLDNITHVPGGGNKKIETHK-SKVNKLDPMPVPATQLR-a17-b5	WT_Tau	reverse_WT_Tau	intra-protein xl	370	188	182	4345.38	1087.35	4	4.1	1	6.21
TPPKSPSSAKSR-KLDLSNVQSK-a4-b1	WT_Tau	WT_Tau	intra-protein xl	234	281	47	2510.36	628.597	4	-4.7	1	6.15
VTSKCGSLGNIHHKPGGGQVEVK-KNGGGPVHTINDLSGIKSQVR-a4-b1	WT_Tau	reverse_WT_Tau	intra-protein xl	321	73	248	4702.45	1176.62	4	-3.8	1	6.15
VQSKIGSLDNITHVPGGGNK-AKANERFTLK-a4-b2	WT_Tau	reverse_WT_Tau	intra-protein xl	353	59	294	3334.81	834.711	4	4.1	1	6.1
SLDVPKYVIQVSGGGPVHK-K6-K19	reverse_WT_Tau	-	intralink	131	144	13	2117.15	706.725	3	-0.3	1	6.06
GGGPQHKLNETSGIK-FTLKHTEIKK-a7-b9	reverse_WT_Tau	reverse_WT_Tau	intra-protein xl	175	72	103	2903.59	968.871	3	0.4	1	6.05
GADGKTKIATPR-KDDSGTGDKSK-a7-b1	WT_Tau	reverse_WT_Tau	intra-protein xl	150	302	152	2488.27	830.431	3	-2.7	1	6.02
FTLKHTEIK-K4-K9	reverse_WT_Tau	-	intralink	67	72	5	1253.7	418.907	3	-4.2	1	5.96
TPPAPKTPPSSGEPPKSGDR-ASSPSKPPTRVVAVKKPER-a6-b6	WT_Tau	reverse_WT_Tau	intra-protein xl	180	208	28	4173.26	1392.1	3	1.8	1	5.94
GGGPQHKLNETSGIKSK-TPPKSPSSAKSR-a15-b10	reverse_WT_Tau	WT_Tau	intra-protein xl	183	240	57	3116.66	780.173	4	0.5	1	5.93
DGSKPPEGSSPPTKPAPPTKAPIR-AKTDHGAEIVYK-a14-b2	reverse_WT_Tau	WT_Tau	intra-protein xl	262	385	123	3880.05	971.02	4	3.4	1	5.87
GGGPQHKLNETSGIKSK-DDSGTGDKSKSVMR-a15-b8	reverse_WT_Tau	reverse_WT_Tau	intra-protein xl	183	310	127	3356.65	672.338	5	-3	1	5.86
SKIGSTENLKHQPGGGK-KIETHK-a2-b1	WT_Tau	WT_Tau	intra-protein xl	259	370	111	2629.41	877.478	3	-3.7	1	5.83
DGSKPPEGSSPPTKPAPPTKAPIR-AKANERFTLK-a4-b2	reverse_WT_Tau	reverse_WT_Tau	intra-protein xl	252	59	193	3726.03	746.213	5	3.8	1	5.79
YVIQVSGGGPVHKINDK-KIETHKLTFR-a13-b6	reverse_WT_Tau	WT_Tau	intra-protein xl	144	375	231	3219.78	1074.27	3	1.9	2	5.77
YVIQVSGGGPVHKINDK-HQPGGGKVQIINKK-a13-b13	reverse_WT_Tau	WT_Tau	intra-protein xl	144	280	136	3450.92	1151.32	3	3.2	1	5.76
NIIQVKGGGPQHKLNETSGIK-TKIATPRGAAPPGQK-a6-b2	reverse_WT_Tau	WT_Tau	intra-protein xl	168	150	18	3847.16	962.798	4	4.2	1	5.73
YVIQVSGGGPVHKINDK-LDLSNVQSKCGSK-a13-b9	reverse_WT_Tau	WT_Tau	intra-protein xl	144	290	146	3382.76	1128.59	3	-0.3	1	5.67
LGADTDGEQDQHXTYGGQDKR-SKSVXR-a20-b2	reverse_WT_Tau	reverse_WT_Tau	intra-protein xl	418	312	106	3197.44	800.369	4	2.8	1	5.65
VTSKCGSLGNIHHKPGGGQVEVK-SPSSAKSR-a14-b6	WT_Tau	WT_Tau	intra-protein xl	331	240	91	3344.73	1115.92	3	0.3	1	5.64
STVKSLDVPKYVIQVSGGGPVHK-K4-K23	reverse_WT_Tau	-	intralink	125	144	19	2532.39	845.14	3	0	1	5.61
ESKVEVQGGGPKHHINGLSGCK-K12-K22	reverse_WT_Tau	-	intralink	111	121	10	2455.23	614.815	4	-0.1	2	5.59
KPERTPPTPLSPTRSR-KLDLSNVQSK-a1-b1	reverse_WT_Tau	WT_Tau	intra-protein xl	218	281	63	3087.7	1030.24	3	-0.8	1	5.58
APIRTANAQGKQGPPAAGRPTAIK-YVIQVSGGGPVHKINDK-a11-b13	reverse_WT_Tau	reverse_WT_Tau	intra-protein xl	279	144	135	4318.38	720.738	6	3.1	3	5.56
DGSKPPEGSSPPTKPAPPTKAPIR-QGPPAAGRPTAIKTK-a4-b13	reverse_WT_Tau	reverse_WT_Tau	intra-protein xl	252	292	40	4041.2	1348.08	3	0	2	5.55
GGGPQHKLNETSGIKSK-VQIINKK-a7-b6	reverse_WT_Tau	WT_Tau	intra-protein xl	175	280	105	2716.52	680.138	4	-0.3	1	5.53
DNIKHVPGGGSVQIVYKPVDLSK-K17-156	WT_Tau	-	monolink	311	n/a	-	2605.41	869.477	3	-1.8	1	5.52
TANAQGKQGPPAAGRPTAIKTK-IPAKTPPAPK-a20-b4	reverse_WT_Tau	WT_Tau	intra-protein xl	292	174	118	3318.86	830.723	4	-5	1	5.51
KNGGGPVHTINDLSGIK-HQPGGGKVQIINK-a1-b7	reverse_WT_Tau	WT_Tau	intra-protein xl	73	274	201	3218.75	1073.92	3	-1.7	3	5.48
TPPAPKTPPSSGEPPKSGDR-KVAVVRTPPK-a16-b1	WT_Tau	WT_Tau	intra-protein xl	190	225	35	3233.78	809.452	4	0.3	1	5.47
ADSTESGPEESGDETPTQLPSEKLGADTDGEQDQHMTYGGQDKR-KPERTPPTPLSPTRSR-a43-b1	reverse_WT_Tau	reverse_WT_Tau	intra-protein xl	418	218	200	6650.06	1109.35	6	-3.6	3	5.46
GGGPQHKLNETSGIK-K7-156	reverse_WT_Tau	-	monolink	175	n/a	-	1677.87	560.296	3	-1.8	1	5.45
SLDVPKYVIQVSGGGPVHK-K19-155	reverse_WT_Tau	-	monolink	144	n/a	-	2134.18	712.4	3	-1.5	3	5.44
LQTAPVPXPDLKNVKSK-VNKLDPXPVPATQLR-a12-b3	WT_Tau	reverse_WT_Tau	intra-protein xl	254	188	66	3713.02	929.262	4	-2.6	1	5.3
XVSKSKDGTGSDDK-KVAVVRTPPK-a6-b1	WT_Tau	WT_Tau	intra-protein xl	132	225	93	2701.43	901.486	3	1.2	1	5.27
GGGPQHKLNETSGIKSK-SKIGSTENLK-a7-b2	reverse_WT_Tau	WT_Tau	intra-protein xl	175	259	84	2950.57	738.651	4	0.6	4	5.26
KLDLSNVQSKCGSK-LNETSGIKSKVNK-a1-b10	WT_Tau	reverse_WT_Tau	intra-protein xl	281	185	96	3117.66	1040.23	3	-2.4	2	5.23
VQSKIGSLDNITHVPGGGNKK-SQVNSLDLKK-a20-b9	WT_Tau	reverse_WT_Tau	intra-protein xl	369	161	208	3416.87	1139.96	3	0.9	1	5.23
KNGGGPVHTINDLSGIK-K1-156	reverse_WT_Tau	-	monolink	73	n/a	-	1861.99	621.671	3	-0.8	1	5.17
IGSLDNITHVPGGGNKKIETHK-LQTAPVPMPDLKNVKSK-a17-b12	WT_Tau	WT_Tau	intra-protein xl	370	254	116	4317.37	1080.35	4	4.4	2	5.16
DRVQSKIGSLDNITHVPGGGNK-NVKSKIGSTENLK-a6-b3	WT_Tau	WT_Tau	intra-protein xl	353	257	96	3846.07	962.526	4	3.4	2	5.1
IGSLDNITHVPGGGNKK-K16-K17	WT_Tau	-	intralink	369	370	1	1843.98	615.666	3	-1.8	1	5.06
SKIGSTENLKHQPGGGK-LNETSGIKSK-a10-b8	WT_Tau	reverse_WT_Tau	intra-protein xl	267	183	84	2950.58	738.654	4	4.1	1	5.01
GQANATRIPAKTPPAPK-MVSKSK-a11-b4	WT_Tau	WT_Tau	intra-protein xl	174	130	44	2533.4	634.357	4	-3.3	1	4.99
GGGPQHKLNETSGIKSK-SKASSPSKPPTR-a7-b2	reverse_WT_Tau	reverse_WT_Tau	intra-protein xl	175	202	27	3116.66	1039.89	3	1.1	2	4.97
ASSPSKPPTRVVAVKKPER-SKDGTGSDDKK-a6-b10	reverse_WT_Tau	WT_Tau	intra-protein xl	208	140	68	3307.79	827.954	4	3.7	1	4.96
LQTAPVPMPDLKNVK-AKKDDSGTGDK-a12-b3	WT_Tau	reverse_WT_Tau	intra-protein xl	254	302	48	2908.54	970.52	3	5	1	4.94
GADGKTKIATPR-DKFDLKESK-a5-b2	WT_Tau	reverse_WT_Tau	intra-protein xl	148	95	53	2460.33	821.119	3	3.9	1	4.91
STVKSLDVPKYVIQVSGGGPVHK-K4-K10	reverse_WT_Tau	-	intralink	125	131	6	2532.39	845.136	3	-3.6	1	4.82
DNIKHVPGGGSVQIVYKPVDLSKVTSK-DGSKPPEGSSPPTKPAPPTK-a23-b14	WT_Tau	reverse_WT_Tau	intra-protein xl	317	262	55	4976.63	1245.16	4	-4.5	1	4.74
HTEIKKNGGGPVHTINDLSGIK-K6-156	reverse_WT_Tau	-	monolink	73	n/a	-	2470.31	824.444	3	-4.1	1	4.72
DNIKHVPGGGSVQIVYKPVDLSK-K23-156	WT_Tau	-	monolink	317	n/a	-	2605.42	652.363	4	3	5	4.72
YVIQVSGGGPVHKINDKSGCK-SPSSAKSRLQTAPVPMPDLK-a17-b6	reverse_WT_Tau	WT_Tau	intra-protein xl	148	240	92	4489.36	1123.35	4	2.9	1	4.71
KNGGGPVHTINDLSGIKSQVR-SRLQTAPVPMPDLKNVK-a17-b14	reverse_WT_Tau	WT_Tau	intra-protein xl	89	254	165	4207.31	1403.44	3	4.5	1	4.68
KNIIQVKGGGPQHK-MVSKSKDGTGSDDK-a1-b4	reverse_WT_Tau	WT_Tau	intra-protein xl	162	130	32	3094.6	1032.54	3	-1.5	1	4.66
SKIGSTENLKHQPGGGK-DDSGTGDKSKSVMR-a10-b10	WT_Tau	reverse_WT_Tau	intra-protein xl	267	312	45	3356.68	840.177	4	3.6	1	4.63
VQSKIGSLDNITHVPGGGNKK-IPAKTPPAPKTPPSSGEPPK-a4-b4	WT_Tau	WT_Tau	intra-protein xl	353	174	179	4282.35	1428.46	3	2.8	1	4.62
HTEIKKNGGGPVHTINDLSGIK-K5-K22	reverse_WT_Tau	-	intralink	72	89	17	2452.32	818.446	3	3	1	4.59
NGGGPVHTINDLSGIKSQVRDK-NVKSKIGSTENLK-a16-b5	reverse_WT_Tau	WT_Tau	intra-protein xl	89	259	170	3846.07	962.526	4	3.4	1	4.54
VTSKCGSLGNIHHKPGGGQVEVK-K14-K23	WT_Tau	-	intralink	331	340	9	2526.3	843.108	3	-0.8	2	4.51
NGGGPVHTINDLSGIKSQVRDK-LNETSGIKSKVNK-a16-b10	reverse_WT_Tau	reverse_WT_Tau	intra-protein xl	89	185	96	3846.07	962.526	4	3.4	2	4.5
LDLSNVQSKCGSK-IPAKTPPAPK-a9-b4	WT_Tau	WT_Tau	intra-protein xl	290	174	116	2591.39	864.803	3	-4.8	1	4.47
SKIGSTENLKHQPGGGK-SKASSPSKPPTR-a10-b2	WT_Tau	reverse_WT_Tau	intra-protein xl	267	202	65	3116.66	1039.89	3	-0.2	1	4.46
SKIGSTENLKHQPGGGK-SKIGSTENLK-a2-b2	WT_Tau	WT_Tau	intra-protein xl	259	259	0	2950.57	738.651	4	0.6	1	4.4
KNGGGPVHTINDLSGIKSQVR-DKFDLKESK-a17-b2	reverse_WT_Tau	reverse_WT_Tau	intra-protein xl	89	95	6	3422.82	1141.95	3	1.6	1	4.39
CGSKDNIKHVPGGGSVQIVYKPVDLSK-K27-155	WT_Tau	-	monolink	317	n/a	-	3036.6	1013.21	3	-2.4	1	4.37
SQVNSLDLKKNIIQVK-SKDGTGSDDKK-a10-b2	reverse_WT_Tau	WT_Tau	intra-protein xl	162	132	30	3100.66	1034.56	3	-0.4	1	4.34
VEVQGGGPKHHINGLSGCKSTVK-K19-156	reverse_WT_Tau	-	monolink	121	n/a	-	2544.31	849.111	3	-1.1	1	4.34
QEFEVMEDHAGTYGLGDRKDQGGYTXHQDQEGDTDAGLK-VQSKIGSLDNITHVPGGGNKK-a19-b20	WT_Tau	WT_Tau	intra-protein xl	24	369	345	6630.1	1327.03	5	0.6	3	4.33
CGSKDNIKHVPGGGSVQIVYKPVDLSK-K4-K27	WT_Tau	-	intralink	294	317	23	3019.58	1007.53	3	-0.9	1	4.32
QGPPAAGRPTAIKTKGDAGK-GAAPPGQKGQANATRIPAK-a15-b8	reverse_WT_Tau	WT_Tau	intra-protein xl	294	163	131	3890.11	973.536	4	-3.3	1	4.29
QEFEVMEDHAGTYGLGDRKDQGGYTXHQDQEGDTDAGLK-VQSKIGSLDNITHVPGGGNKK-a19-b4	WT_Tau	WT_Tau	intra-protein xl	24	353	329	6630.1	1327.03	5	0.6	3	4.23
KLDLSNVQSK-IETHKLTFR-a1-b5	WT_Tau	WT_Tau	intra-protein xl	281	375	94	2412.34	805.121	3	1.3	1	4.22
LQTAPVPXPDLKNVK-GADGKTKIATPR-a12-b5	WT_Tau	WT_Tau	intra-protein xl	254	148	106	3017.66	755.422	4	-1	1	4.14
DGSKPPEGSSPPTKPAPPTK-IATPRGAAPPGQKGQANATR-a14-b13	reverse_WT_Tau	WT_Tau	intra-protein xl	262	163	99	4073.11	1358.71	3	-4.7	1	4.1
KNGGGPVHTINDLSGIKSQVR-SKVNKLDPMPVPATQLR-a17-b2	reverse_WT_Tau	reverse_WT_Tau	intra-protein xl	89	185	96	4207.31	1403.44	3	4.4	6	4.05
STVKSLDVPKYVIQVSGGGPVHK-K10-156	reverse_WT_Tau	-	monolink	131	n/a	-	2550.4	851.141	3	-1.9	1	4.03
DRVQSKIGSLDNITHVPGGGNK-LNETSGIKSKVNK-a6-b10	WT_Tau	reverse_WT_Tau	intra-protein xl	353	185	168	3846.07	962.526	4	3.7	2	4.02
KPERTPPTPLSPTR-KPERTPPTPLSPTR-a1-b1	reverse_WT_Tau	reverse_WT_Tau	intra-protein xl	218	218	0	3289.8	1097.61	3	-3	1	4.02
TANAQGKQGPPAAGRPTAIKTK-SKDGTGSDDKK-a7-b2	reverse_WT_Tau	WT_Tau	intra-protein xl	279	132	147	3436.78	1146.6	3	-3.1	1	4
QEFEVXEDHAGTYGLGDRKDQGGYTMHQDQEGDTDAGLK-VQSKIGSLDNITHVPGGGNKK-a19-b20	WT_Tau	WT_Tau	intra-protein xl	24	369	345	6630.08	1327.02	5	-2.4	4	3.94
DNIKHVPGGGSVQIVYKPVDLSKVTSK-K4-156	WT_Tau	-	monolink	298	n/a	-	3020.65	756.17	4	-1.5	1	3.88
SLDVPKYVIQVSGGGPVHKINDK-K19-156	reverse_WT_Tau	-	monolink	144	n/a	-	2605.41	869.477	3	-1.8	2	3.83
SLDVPKYVIQVSGGGPVHKINDK-TKGDAGKAK-a6-b7	reverse_WT_Tau	reverse_WT_Tau	intra-protein xl	131	299	168	3461.88	1154.97	3	-1.1	1	3.81
HHINGLSGCKSTVKSLDVPK-K20-155	reverse_WT_Tau	-	monolink	131	n/a	-	2331.24	778.088	3	0.9	1	3.79
TPPKSPSSAKSR-AKKDDSGTGDK-a10-b3	WT_Tau	reverse_WT_Tau	intra-protein xl	240	302	62	2500.28	834.435	3	1.6	1	3.68
KNGGGPVHTINDLSGIKSQVR-SKVNKLDPMPVPATQLR-a17-b5	reverse_WT_Tau	reverse_WT_Tau	intra-protein xl	89	188	99	4207.31	1403.44	3	4.5	1	3.59
KNGGGPVHTINDLSGIKSQVR-VNKLDPMPVPATQLRSK-a17-b3	reverse_WT_Tau	reverse_WT_Tau	intra-protein xl	89	188	99	4207.31	1403.44	3	4.9	7	3.56
STVKSLDVPKYVIQVSGGGPVHK-K23-156	reverse_WT_Tau	-	monolink	144	n/a	-	2550.41	638.609	4	-0.2	2	3.55
VTSKCGSLGNIHHKPGGGQVEVKSEK-SKASSPSKPPTRVVAVK-a4-b8	WT_Tau	reverse_WT_Tau	intra-protein xl	321	208	113	4608.47	1153.12	4	-2.9	1	3.53
LGADTDGEQDQHMTYGGQDKRDGLGYTGAHDEXVEFEQRPEAX-VNKLDPXPVPATQLR-a20-b3	reverse_WT_Tau	reverse_WT_Tau	intra-protein xl	418	188	230	6648.03	1330.61	5	1.7	1	3.53
TPPAPKTPPSSGEPPKSGDR-TKIATPRGAAPPGQK-a16-b2	WT_Tau	WT_Tau	intra-protein xl	190	150	40	3631.93	1211.65	3	-0.4	2	3.52
VQSKIGSLDNITHVPGGGNK-GQANATRIPAKTPPAPK-a4-b11	WT_Tau	WT_Tau	intra-protein xl	353	174	179	3875.11	1292.71	3	2.2	3	3.47
SLDVPKYVIQVSGGGPVHKINDK-TKGDAGKAK-a19-b7	reverse_WT_Tau	reverse_WT_Tau	intra-protein xl	144	299	155	3461.89	1154.97	3	-0.2	1	3.44
TPPKSPSSAKSR-AKKDDSGTGDK-a10-b2	WT_Tau	reverse_WT_Tau	intra-protein xl	240	301	61	2500.28	834.435	3	1.6	1	3.36
KPERTPPTPLSPTR-AKTDHGAEIVYK-a1-b2	reverse_WT_Tau	WT_Tau	intra-protein xl	218	385	167	3044.64	1015.89	3	4	2	3.35
CGSLGNIHHKPGGGQVEVKSEK-FTLKHTEIKK-a19-b4	WT_Tau	reverse_WT_Tau	intra-protein xl	340	67	273	3698.97	1234	3	3.5	1	3.34
VEVQGGGPKHHINGLSGCK-SKASSPSKPPTRVVAVK-a9-b2	reverse_WT_Tau	reverse_WT_Tau	intra-protein xl	111	202	91	3849.06	1284.03	3	-1.9	1	3.29
QEFEVMEDHAGTYGLGDRKDQGGYTXHQDQEGDTDAGLK-KNGGGPVHTINDLSGIKSQVR-a19-b17	WT_Tau	reverse_WT_Tau	intra-protein xl	24	89	65	6658.07	1332.62	5	-3.7	1	3.26
KDQGGYTMHQDQEGDTDAGLKESPLQTPTEDGSEEPGSETSDAK-KPERTPPTPLSPTRSR-a21-b1	WT_Tau	reverse_WT_Tau	intra-protein xl	44	218	174	6622.07	1104.69	6	-2	1	3.24
GAAPPGQKGQANATR-SKIGSTENLK-a8-b2	WT_Tau	WT_Tau	intra-protein xl	163	259	96	2636.39	879.804	3	-0.4	1	3.24
QGPPAAGRPTAIKTKGDAGK-AKTDHGAEIVYK-a13-b2	reverse_WT_Tau	WT_Tau	intra-protein xl	292	385	93	3388.81	848.211	4	0.3	1	3.22
AKTDHGAEIVYKSPVVSGDTSPR-K12-156	WT_Tau	-	monolink	395	n/a	-	2569.29	857.439	3	-3.9	1	3.17
TANAQGKQGPPAAGRPTAIKTK-SKDGTGSDDKK-a7-b10	reverse_WT_Tau	WT_Tau	intra-protein xl	279	140	139	3436.81	1146.61	3	4.8	1	3.17
KPERTPPTPLSPTR-YVIEAGHDTKAK-a1-b10	reverse_WT_Tau	reverse_WT_Tau	intra-protein xl	218	57	161	3044.64	1015.89	3	4	1	3.13
QEFEVMEDHAGTYGLGDRKDQGGYTMHQDQEGDTDAGLK-VQSKIGSLDNITHVPGGGNKK-a19-b20	WT_Tau	WT_Tau	intra-protein xl	24	369	345	6614.08	1323.83	5	-2.3	3	3.1
GGGPQHKLNETSGIKSK-SKIGSTENLK-a15-b2	reverse_WT_Tau	WT_Tau	intra-protein xl	183	259	76	2950.57	984.533	3	1	2	3.09
DGSKPPEGSSPPTKPAPPTKAPIRTANAQGK-IGSLDNITHVPGGGNKK-a4-b16	reverse_WT_Tau	WT_Tau	intra-protein xl	252	369	117	4925.58	1232.4	4	-3.5	2	3.05
INDKSGCKSQVNSLDLK-NVKSKIGSTENLK-a4-b3	reverse_WT_Tau	WT_Tau	intra-protein xl	148	257	109	3459.81	865.961	4	-3.2	2	3
NGGGPVHTINDLSGIKSQVRDK-NVKSKIGSTENLK-a16-b3	reverse_WT_Tau	WT_Tau	intra-protein xl	89	257	168	3846.07	962.526	4	3.4	1	3
SKIGSTENLKHQPGGGK-YVIEAGHDTKAKANER-a2-b12	WT_Tau	reverse_WT_Tau	intra-protein xl	259	59	200	3675.91	1226.31	3	4.5	1	2.9
DNIKHVPGGGSVQIVYKPVDLSK-K4-K23	WT_Tau	-	intralink	298	317	19	2587.4	863.475	3	0.7	1	2.89
KNGGGPVHTINDLSGIKSQVR-KPERTPPTPLSPTR-a1-b1	reverse_WT_Tau	reverse_WT_Tau	intra-protein xl	73	218	145	3890.11	973.537	4	0.5	1	2.76
CGSKDNIKHVPGGGSVQIVYKPVDLSK-K21-156	WT_Tau	-	monolink	311	n/a	-	3037.61	1013.54	3	5	2	2.76
HVPGGGSVQIVYKPVDLSKVTSK-AKTDHGAEIVYK-a19-b2	WT_Tau	WT_Tau	intra-protein xl	317	385	68	3863.09	1288.71	3	2.6	1	2.75
KNGGGPVHTINDLSGIKSQVR-SRLQTAPVPMPDLKNVK-a1-b14	reverse_WT_Tau	WT_Tau	intra-protein xl	73	254	181	4207.31	1403.44	3	4.9	1	2.72
QGPPAAGRPTAIKTKGDAGK-LQTAPVPXPDLKNVK-a15-b12	reverse_WT_Tau	WT_Tau	intra-protein xl	294	254	40	3724.04	1242.36	3	1.8	1	2.71
SGCKSQVNSLDLKK-ESKVEVQGGGPK-a4-b3	reverse_WT_Tau	reverse_WT_Tau	intra-protein xl	152	102	50	2914.52	972.514	3	4.4	1	2.65
SPSSAKSRLQTAPVPMPDLK-K6-K20	WT_Tau	-	intralink	240	254	14	2247.18	750.069	3	-4.3	5	2.61
GAAPPGQKGQANATRIPAK-IGSLDNITHVPGGGNKK-a8-b16	WT_Tau	WT_Tau	intra-protein xl	163	369	206	3675.97	1226.33	3	-3.5	1	2.61
VQSKIGSLDNITHVPGGGNK-VQSKIGSLDNITHVPGGGNK-a4-b4	WT_Tau	WT_Tau	intra-protein xl	353	353	0	4178.2	1045.56	4	-2.4	2	2.6
IPAKTPPAPKTPPSSGEPPK-SRLQTAPVPXPDLKNVK-a10-b14	WT_Tau	WT_Tau	intra-protein xl	180	254	74	4043.21	1348.74	3	-1.6	4	2.51
VNKLDPMPVPATQLR-TPSLPTPPTREPKK-a3-b13	reverse_WT_Tau	WT_Tau	intra-protein xl	188	224	36	3363.86	1122.29	3	-0.6	1	2.49
CGSLGNIHHKPGGGQVEVKSEK-ASSPSKPPTRVVAVK-a19-b6	WT_Tau	reverse_WT_Tau	intra-protein xl	340	208	132	3978.11	995.536	4	0	1	2.45
AKTDHGAEIVYK-SKASSPSKPPTR-a2-b2	WT_Tau	reverse_WT_Tau	intra-protein xl	385	202	183	2710.43	904.483	3	-1.6	1	2.43
YVIQVSGGGPVHKINDKSGCK-SRLQTAPVPXPDLKNVK-a13-b14	reverse_WT_Tau	WT_Tau	intra-protein xl	144	254	110	4289.28	1073.33	4	3.1	2	2.41
TPPAPKTPPSSGEPPKSGDR-QGPPAAGRPTAIKTK-a6-b13	WT_Tau	reverse_WT_Tau	intra-protein xl	180	292	112	3631.93	1211.65	3	-0.7	1	2.4
KPERTPPTPLSPTRSR-AKKDDSGTGDK-a1-b2	reverse_WT_Tau	reverse_WT_Tau	intra-protein xl	218	301	83	3077.62	770.414	4	4	1	2.39
LQTAPVPXPDLKNVKSK-YVIQVSGGGPVHKINDK-a15-b13	WT_Tau	reverse_WT_Tau	intra-protein xl	257	144	113	3829.09	1277.37	3	3.1	1	2.37
YVIQVSGGGPVHKINDKSGCK-VNKLDPXPVPATQLRSK-a17-b3	reverse_WT_Tau	reverse_WT_Tau	intra-protein xl	148	188	40	4289.28	1073.33	4	3.1	1	2.36
ENAKAKTDHGAEIVYK-KIETHKLTFR-a4-b1	WT_Tau	WT_Tau	intra-protein xl	383	370	13	3182.72	1061.92	3	4.7	1	2.35
KNGGGPVHTINDLSGIK-NVKSKIGSTENLK-a1-b3	reverse_WT_Tau	WT_Tau	intra-protein xl	73	257	184	3260.78	1087.93	3	3.1	2	2.35
TANAQGKQGPPAAGRPTAIK-VQSKIGSLDNITHVPGGGNK-a7-b4	reverse_WT_Tau	WT_Tau	intra-protein xl	279	353	74	4091.2	1364.74	3	2.7	1	2.29
GAAPPGQKGQANATR-VNKLDPXPVPATQLR-a8-b3	WT_Tau	reverse_WT_Tau	intra-protein xl	163	188	25	3254.74	814.691	4	4.7	1	2.24
SKIGSTENLKHQPGGGK-FDLKESKVEVQGGGPK-a10-b4	WT_Tau	reverse_WT_Tau	intra-protein xl	267	99	168	3591.9	898.983	4	3.4	1	2.14
APIRTANAQGKQGPPAAGRPTAIK-VQSKIGSLDNITHVPGGGNKK-a11-b4	reverse_WT_Tau	WT_Tau	intra-protein xl	279	353	74	4656.54	932.317	5	-3	1	2.04
SGCKSQVNSLDLK-SKDGTGSDDK-a4-b2	reverse_WT_Tau	WT_Tau	intra-protein xl	152	132	20	2581.21	861.411	3	-3.5	1	2.03
HQPGGGKVQIINKK-MVSKSKDGTGSDDK-a13-b4	WT_Tau	WT_Tau	intra-protein xl	280	130	150	3094.6	1032.54	3	-1.5	2	1.95
LDLSNVQSKCGSKDNIK-KPERTPPTPLSPTRSR-a13-b1	WT_Tau	reverse_WT_Tau	intra-protein xl	294	218	76	3862.05	1288.36	3	3.1	1	1.93
DQGGYTXHQDQEGDTDAGLKESPLQTPTEDGSEEPGSETSDAK-VNKLDPXPVPATQLRSK-a20-b3	WT_Tau	reverse_WT_Tau	intra-protein xl	44	188	144	6600.05	1321.02	5	4.2	3	1.89
GAAPPGQKGQANATRIPAK-FDLKESKVEVQGGGPK-a8-b4	WT_Tau	reverse_WT_Tau	intra-protein xl	163	99	64	3686.99	1230	3	4.1	1	1.78
SKASSPSKPPTRVVAVK-KLDLSNVQSK-a8-b1	reverse_WT_Tau	WT_Tau	intra-protein xl	208	281	73	3006.7	1003.24	3	-1.5	1	1.76
DQGGYTXHQDQEGDTDAGLKESPLQTPTEDGSEEPGSETSDAK-SKVNKLDPXPVPATQLR-a20-b5	WT_Tau	reverse_WT_Tau	intra-protein xl	44	188	144	6600.05	1321.02	5	4.2	1	1.67
LQTAPVPMPDLKNVKSK-FDLKESKVEVQGGGPK-a15-b4	WT_Tau	reverse_WT_Tau	intra-protein xl	257	99	158	3720.02	1241.01	3	-0.2	1	1.63
VQSKIGSLDNITHVPGGGNK-TPSLPTPPTREPKK-a4-b13	WT_Tau	WT_Tau	intra-protein xl	353	224	129	3706	1236.34	3	-1.3	1	1.51
DGSKPPEGSSPPTKPAPPTKAPIR-TKIATPRGAAPPGQK-a14-b2	reverse_WT_Tau	WT_Tau	intra-protein xl	262	150	112	4041.2	1011.31	4	-0.9	1	1.48
TANAQGKQGPPAAGRPTAIKTK-VNKLDPXPVPATQLR-a7-b3	reverse_WT_Tau	reverse_WT_Tau	intra-protein xl	279	188	91	3994.16	999.549	4	-4	1	1.44
DRVQSKIGSLDNITHVPGGGNK-KLDLSNVQSKCGSK-a6-b10	WT_Tau	WT_Tau	intra-protein xl	353	290	63	3992.09	1331.7	3	4	1	1.4
KPERTPPTPLSPTRSR-GAAPPGQKGQANATR-a1-b8	reverse_WT_Tau	WT_Tau	intra-protein xl	218	163	55	3379.8	845.958	4	-1.4	1	1.36
DGSKPPEGSSPPTKPAPPTKAPIR-VNKLDPXPVPATQLR-a4-b3	reverse_WT_Tau	reverse_WT_Tau	intra-protein xl	252	188	64	4243.27	1061.82	4	-0.3	1	1.35
DGSKPPEGSSPPTKPAPPTK-LQTAPVPXPDLKNVKSK-a14-b15	reverse_WT_Tau	WT_Tau	intra-protein xl	262	257	5	3993.1	1332.04	3	-3.5	1	1.29
HHINGLSGCKSTVKSLDVPK-ASSPSKPPTRVVAVK-a14-b6	reverse_WT_Tau	reverse_WT_Tau	intra-protein xl	125	208	83	3837.11	960.286	4	4.5	1	1.18
STVKSLDVPKYVIQVSGGGPVHK-DGSKPPEGSSPPTKPAPPTK-a4-b14	reverse_WT_Tau	reverse_WT_Tau	intra-protein xl	125	262	137	4506.38	1127.6	4	-4	1	0.92
CGSLGNIHHKPGGGQVEVKSEKLDFK-TPSLPTPPTREPKK-a10-b13	WT_Tau	WT_Tau	intra-protein xl	331	224	107	4506.38	1127.6	4	2.6	1	0.8
KNGGGPVHTINDLSGIK-KPERTPPTPLSPTRSR-a1-b1	reverse_WT_Tau	reverse_WT_Tau	intra-protein xl	73	218	145	3662.99	1222	3	-0.3	2	0.79
VQSKIGSLDNITHVPGGGNK-YVIQVSGGGPVHKINDK-a4-b13	WT_Tau	reverse_WT_Tau	intra-protein xl	353	144	209	3968.1	993.034	4	-2	1	0.67
ASSPSKPPTRVVAVKKPER-KPERTPPTPLSPTRSR-a16-b1	reverse_WT_Tau	reverse_WT_Tau	intra-protein xl	218	218	0	3990.27	1331.1	3	4.8	1	0.61
IPAKTPPAPKTPPSSGEPPK-SKVNKLDPXPVPATQLR-a4-b5	WT_Tau	reverse_WT_Tau	intra-protein xl	174	188	14	4043.21	1348.74	3	-1.5	3	0.57
IPAKTPPAPKTPPSSGEPPK-VNKLDPXPVPATQLRSK-a4-b3	WT_Tau	reverse_WT_Tau	intra-protein xl	174	188	14	4043.21	1348.74	3	-1.6	2	0.57
IATPRGAAPPGQKGQANATR-TKIATPRGAAPPGQK-a13-b2	WT_Tau	WT_Tau	intra-protein xl	163	150	13	3590.97	898.751	4	-0.9	1	0.56
YVIEAGHDTKAKANER-K10-K12	reverse_WT_Tau	-	intralink	57	59	2	1938.98	647.335	3	1.1	1	0.54
KDQGGYTMHQDQEGDTDAGLK-KDQGGYTXHQDQEGDTDAGLK-a1-b1	WT_Tau	WT_Tau	intra-protein xl	24	24	0	4740.03	1186.02	4	-2.6	1	0.29

## Sheet: Fig4f_WT4
Id	Protein1	Protein2	XLType	AbsPos1	AbsPos2	deltaAA	Mr	Mz	z	Error_rel[ppm]	nseen	ld-Score
VQIINKKLDLSNVQSK-K6-K7	WT_Tau	-	intralink	280	281	1	1964.13	655.717	3	-0.9	18	51.84
DNIKHVPGGGSVQIVYKPVDLSK-K4-155	WT_Tau	-	monolink	298	n/a	-	2604.42	869.149	3	-1.9	10	51.21
HQPGGGKVQIINK-K7-155	WT_Tau	-	monolink	274	n/a	-	1529.87	510.963	3	-1.7	13	50.73
CGSLGNIHHKPGGGQVEVK-K10-155	WT_Tau	-	monolink	331	n/a	-	2128.09	533.029	4	-0.4	18	49.68
DNIKHVPGGGSVQIVYKPVDLSK-K4-156	WT_Tau	-	monolink	298	n/a	-	2605.41	869.477	3	-1.6	31	49.08
HVPGGGSVQIVYKPVDLSKVTSK-K19-155	WT_Tau	-	monolink	317	n/a	-	2549.42	638.363	4	-1.1	7	46.69
HQPGGGKVQIINK-K7-156	WT_Tau	-	monolink	274	n/a	-	1530.85	511.292	3	0.1	12	46.6
HVPGGGSVQIVYKPVDLSKVTSK-K19-156	WT_Tau	-	monolink	317	n/a	-	2550.4	638.609	4	-0.9	29	45.89
KLDLSNVQSKCGSK-K10-155	WT_Tau	-	monolink	290	n/a	-	1717.9	573.642	3	-1.3	1	45.66
VQSKIGSLDNITHVPGGGNK-SEKLDFKDR-a4-b7	WT_Tau	WT_Tau	intra-protein xl	353	347	6	3294.72	824.688	4	-0.6	3	44.39
HVPGGGSVQIVYKPVDLSK-K13-156	WT_Tau	-	monolink	311	n/a	-	2135.16	712.728	3	-0.6	311	44.22
LDLSNVQSKCGSKDNIK-K13-156	WT_Tau	-	monolink	294	n/a	-	2061.04	688.021	3	-0.6	6	43.82
LDLSNVQSKCGSK-K9-155	WT_Tau	-	monolink	290	n/a	-	1589.81	530.943	3	-2.7	1	43.76
CGSLGNIHHKPGGGQVEVKSEK-K19-155	WT_Tau	-	monolink	340	n/a	-	2472.25	825.092	3	-1.9	4	42.83
HVPGGGSVQIVYKPVDLSKVTSK-K19-K23	WT_Tau	-	intralink	317	321	4	2532.39	634.106	4	-0.5	5	42.39
LDLSNVQSKCGSKDNIK-K9-K13	WT_Tau	-	intralink	290	294	4	2043.03	682.018	3	-0.3	2	41.82
CGSLGNIHHKPGGGQVEVKSEK-K19-156	WT_Tau	-	monolink	340	n/a	-	2473.24	825.42	3	-0.7	10	41.52
SEKLDFK-VQIINKK-a3-b6	WT_Tau	WT_Tau	intra-protein xl	343	280	63	1845.06	462.273	4	-1	2	41.39
IGSLDNITHVPGGGNKK-K17-156	WT_Tau	-	monolink	370	n/a	-	1861.99	621.671	3	-0.7	45	41.38
KIETHKLTFR-K6-155	WT_Tau	-	monolink	375	n/a	-	1426.83	476.617	3	-1.9	1	41.13
IGSLDNITHVPGGGNKK-K16-156	WT_Tau	-	monolink	369	n/a	-	1861.99	621.671	3	-0.7	159	41.08
SEKLDFKDR-K7-155	WT_Tau	-	monolink	347	n/a	-	1291.67	431.566	3	-3.1	1	41.03
IGSTENLKHQPGGGK-VQIINKK-a8-b6	WT_Tau	WT_Tau	intra-protein xl	267	280	13	2501.39	834.806	3	-0.7	4	40.94
VQSKIGSLDNITHVPGGGNK-K4-155	WT_Tau	-	monolink	353	n/a	-	2175.16	726.062	3	-1.3	40	40.92
HVPGGGSVQIVYKPVDLSKVTSK-K13-K19	WT_Tau	-	intralink	311	317	6	2532.39	845.139	3	-0.1	118	40.9
KLDLSNVQSKCGSK-K10-156	WT_Tau	-	monolink	290	n/a	-	1718.89	573.97	3	-0.7	3	40.72
IGSLDNITHVPGGGNKK-K16-155	WT_Tau	-	monolink	369	n/a	-	1861.01	621.343	3	-1.5	339	40.72
HVPGGGSVQIVYKPVDLSK-K13-155	WT_Tau	-	monolink	311	n/a	-	2134.17	712.399	3	-2.8	494	40.52
KLDLSNVQSKCGSK-SKIGSTENLK-a10-b2	WT_Tau	WT_Tau	intra-protein xl	290	259	31	2776.46	926.494	3	-2.5	1	40.36
CGSLGNIHHKPGGGQVEVK-K10-156	WT_Tau	-	monolink	331	n/a	-	2129.07	710.697	3	-0.4	16	39.98
VQSKIGSLDNITHVPGGGNK-SEKLDFKDR-a4-b3	WT_Tau	WT_Tau	intra-protein xl	353	343	10	3294.72	550.127	6	-1.4	7	39.9
IGSLDNITHVPGGGNKK-K17-155	WT_Tau	-	monolink	370	n/a	-	1861.01	621.343	3	-1.5	114	39.89
LDLSNVQSKCGSKDNIK-K9-155	WT_Tau	-	monolink	290	n/a	-	2060.05	687.692	3	-2.9	2	39.86
IGSTENLKHQPGGGK-K8-155	WT_Tau	-	monolink	267	n/a	-	1676.88	559.968	3	-2.6	10	39.8
HQPGGGKVQIINK-SKIGSTENLK-a7-b2	WT_Tau	WT_Tau	intra-protein xl	274	259	15	2588.42	518.693	5	-1.8	1	39.08
KLDLSNVQSKCGSK-K10-K14	WT_Tau	-	intralink	290	294	4	1700.87	567.966	3	-1.6	4	38.84
KLDLSNVQSK-K10-155	WT_Tau	-	monolink	290	n/a	-	1285.72	429.582	3	-3.1	1	38.64
VQSKIGSLDNITHVPGGGNK-SEKLDFK-a4-b3	WT_Tau	WT_Tau	intra-protein xl	353	343	10	3023.59	605.725	5	-1.6	13	38.48
LDLSNVQSKCGSK-VQIINKK-a9-b6	WT_Tau	WT_Tau	intra-protein xl	290	280	10	2414.32	604.588	4	-0.6	3	38.36
KLDLSNVQSK-CGSKDNIK-a1-b4	WT_Tau	WT_Tau	intra-protein xl	281	294	13	2189.14	548.292	4	-0.4	6	38.33
VQSKIGSLDNITHVPGGGNK-KIETHK-a4-b1	WT_Tau	WT_Tau	intra-protein xl	353	370	17	2912.57	729.151	4	-0.1	7	38.19
DRVQSKIGSLDNITHVPGGGNK-K6-156	WT_Tau	-	monolink	353	n/a	-	2447.28	612.827	4	-0.6	1	37.83
CGSKDNIK-VQIINKK-a4-b6	WT_Tau	WT_Tau	intra-protein xl	294	280	14	1900.04	634.356	3	-0.9	1	37.26
VTSKCGSLGNIHHKPGGGQVEVK-K4-155	WT_Tau	-	monolink	321	n/a	-	2543.32	848.783	3	-1.7	14	37.25
KLDLSNVQSKCGSK-HQPGGGKVQIINK-a10-b7	WT_Tau	WT_Tau	intra-protein xl	290	274	16	3075.65	616.137	5	-1.4	1	37.11
VQIINKK-LDFKDR-a6-b4	WT_Tau	WT_Tau	intra-protein xl	280	347	67	1772.02	444.012	4	-1.9	2	37.06
DRVQSKIGSLDNITHVPGGGNK-K6-155	WT_Tau	-	monolink	353	n/a	-	2446.29	612.58	4	-2.2	1	37.01
CGSLGNIHHKPGGGQVEVKSEK-LDFKDR-a19-b4	WT_Tau	WT_Tau	intra-protein xl	340	347	7	3247.64	650.535	5	-1.1	1	36.98
HVPGGGSVQIVYKPVDLSK-VQIINKK-a13-b6	WT_Tau	WT_Tau	intra-protein xl	311	280	31	2958.69	740.68	4	-1	2	36.97
CGSLGNIHHKPGGGQVEVK-SEKLDFK-a10-b3	WT_Tau	WT_Tau	intra-protein xl	331	343	12	2976.51	745.135	4	-1.1	4	36.95
IGSLDNITHVPGGGNKKIETHK-K16-K17	WT_Tau	-	intralink	369	370	1	2452.3	614.084	4	-1.2	16	36.89
IGSTENLKHQPGGGK-KLDLSNVQSKCGSK-a8-b10	WT_Tau	WT_Tau	intra-protein xl	267	290	23	3222.66	1075.23	3	-2.6	2	36.81
HVPGGGSVQIVYKPVDLSK-K13-K19	WT_Tau	-	intralink	311	317	6	2117.15	706.725	3	-0.6	3	36.77
KLDLSNVQSK-SKIGSTENLK-a1-b2	WT_Tau	WT_Tau	intra-protein xl	281	259	22	2344.28	587.078	4	-1.2	3	36.66
DNIKHVPGGGSVQIVYKPVDLSK-KLDLSNVQSKCGSK-a4-b10	WT_Tau	WT_Tau	intra-protein xl	298	290	8	4150.2	692.708	6	-1.5	2	36.62
CGSLGNIHHKPGGGQVEVKSEKLDFK-K19-K22	WT_Tau	-	intralink	340	343	3	2958.5	987.174	3	-0.9	2	36.62
VQSKIGSLDNITHVPGGGNKK-K4-155	WT_Tau	-	monolink	353	n/a	-	2303.26	576.822	4	-1.7	8	36.47
VQSKIGSLDNITHVPGGGNK-K4-156	WT_Tau	-	monolink	353	n/a	-	2176.15	726.391	3	0	30	36.15
HQPGGGKVQIINKK-K7-156	WT_Tau	-	monolink	274	n/a	-	1658.94	553.989	3	-1.8	3	36.12
SEKLDFKDR-K3-155	WT_Tau	-	monolink	343	n/a	-	1291.68	431.567	3	-2.1	4	35.97
CGSLGNIHHKPGGGQVEVKSEK-VQSKIGSLDNITHVPGGGNK-a19-b4	WT_Tau	WT_Tau	intra-protein xl	340	353	13	4475.29	896.066	5	-1.4	2	35.96
SEKLDFK-KIETHK-a3-b1	WT_Tau	WT_Tau	intra-protein xl	343	370	27	1757.95	352.598	5	-1.8	4	35.83
CGSLGNIHHKPGGGQVEVKSEKLDFK-K19-155	WT_Tau	-	monolink	340	n/a	-	2975.52	992.849	3	-2.2	2	35.75
IGSLDNITHVPGGGNKK-SEKLDFKDR-a16-b7	WT_Tau	WT_Tau	intra-protein xl	369	347	22	2980.56	746.147	4	-1.4	1	35.65
LDLSNVQSKCGSK-SKIGSTENLK-a9-b2	WT_Tau	WT_Tau	intra-protein xl	290	259	31	2648.37	883.797	3	-1.1	2	35.64
IGSTENLKHQPGGGK-KIETHK-a8-b1	WT_Tau	WT_Tau	intra-protein xl	267	370	103	2414.29	805.771	3	-0.6	2	35.51
VQSKIGSLDNITHVPGGGNKK-K4-156	WT_Tau	-	monolink	353	n/a	-	2304.24	577.068	4	-1.7	29	35.35
IGSTENLKHQPGGGK-SEKLDFK-a8-b3	WT_Tau	WT_Tau	intra-protein xl	267	343	76	2525.31	632.335	4	-1	2	35.27
VTSKCGSLGNIHHKPGGGQVEVK-SEKLDFK-a4-b3	WT_Tau	WT_Tau	intra-protein xl	321	343	22	3391.75	1131.59	3	-0.8	3	35.17
CGSKDNIK-LDFKDR-a4-b4	WT_Tau	WT_Tau	intra-protein xl	294	347	53	1850.92	463.737	4	-0.6	1	35
IGSLDNITHVPGGGNKK-VQIINKK-a16-b6	WT_Tau	WT_Tau	intra-protein xl	369	280	89	2685.52	538.111	5	-0.5	2	34.96
IETHKLTFR-K5-156	WT_Tau	-	monolink	375	n/a	-	1299.72	434.246	3	-2.4	1	34.91
VTSKCGSLGNIHHKPGGGQVEVK-LDFKDR-a4-b4	WT_Tau	WT_Tau	intra-protein xl	321	347	26	3318.71	664.75	5	-1.7	1	34.83
VTSKCGSLGNIHHKPGGGQVEVK-VQIINKK-a4-b6	WT_Tau	WT_Tau	intra-protein xl	321	280	41	3367.84	842.967	4	-1.2	1	34.35
SKIGSTENLK-SEKLDFK-a2-b3	WT_Tau	WT_Tau	intra-protein xl	259	343	84	2079.11	694.044	3	-1.1	1	34.22
SKIGSTENLK-VQIINKK-a2-b6	WT_Tau	WT_Tau	intra-protein xl	259	280	21	2055.19	514.806	4	-1	2	34.11
LDLSNVQSKCGSK-KIETHK-a9-b1	WT_Tau	WT_Tau	intra-protein xl	290	370	80	2327.21	776.745	3	-2	1	34.06
VTSKCGSLGNIHHKPGGGQVEVK-K4-156	WT_Tau	-	monolink	321	n/a	-	2544.32	637.087	4	1.6	48	33.97
HVPGGGSVQIVYKPVDLSK-SEKLDFK-a13-b3	WT_Tau	WT_Tau	intra-protein xl	311	343	32	2982.61	746.66	4	0.1	1	33.97
VTSKCGSLGNIHHKPGGGQVEVK-K4-K14	WT_Tau	-	intralink	321	331	10	2526.3	632.583	4	-0.9	53	33.81
LDLSNVQSKCGSK-SEKLDFK-a9-b3	WT_Tau	WT_Tau	intra-protein xl	290	343	53	2438.23	610.565	4	-2.3	1	33.8
IGSLDNITHVPGGGNKK-SEKLDFK-a16-b3	WT_Tau	WT_Tau	intra-protein xl	369	343	26	2709.43	542.894	5	-0.8	4	33.75
IETHKLTFR-K5-155	WT_Tau	-	monolink	375	n/a	-	1298.73	433.919	3	-3.2	1	33.7
VQSKIGSLDNITHVPGGGNK-K4-K20	WT_Tau	-	intralink	353	369	16	2158.14	720.386	3	-1.1	12	33.66
HQPGGGKVQIINKK-K7-155	WT_Tau	-	monolink	274	n/a	-	1657.96	553.662	3	-0.9	1	33.63
DNIKHVPGGGSVQIVYKPVDLSK-VQIINKK-a4-b6	WT_Tau	WT_Tau	intra-protein xl	298	280	18	3428.93	686.795	5	-1.5	1	33.63
IGSTENLKHQPGGGK-LDLSNVQSKCGSK-a8-b9	WT_Tau	WT_Tau	intra-protein xl	267	290	23	3094.57	619.921	5	-1.6	1	33.45
VTSKCGSLGNIHHKPGGGQVEVK-K14-156	WT_Tau	-	monolink	331	n/a	-	2544.32	637.087	4	1.6	6	33.29
KLDLSNVQSK-LDFKDR-a1-b4	WT_Tau	WT_Tau	intra-protein xl	281	347	66	2061.11	688.045	3	0.9	1	33.26
IGSTENLKHQPGGGK-KLDLSNVQSK-a8-b1	WT_Tau	WT_Tau	intra-protein xl	267	281	14	2790.48	698.629	4	-1.7	4	33.1
CGSLGNIHHKPGGGQVEVK-SEKLDFKDR-a10-b3	WT_Tau	WT_Tau	intra-protein xl	331	343	12	3247.64	812.918	4	-0.2	5	33.1
IGSLDNITHVPGGGNKK-IETHKLTFR-a16-b5	WT_Tau	WT_Tau	intra-protein xl	369	375	6	2987.61	498.943	6	-2.3	1	33.04
SKIGSTENLK-LDFKDR-a2-b4	WT_Tau	WT_Tau	intra-protein xl	259	347	88	2006.07	669.697	3	-0.6	1	32.63
IGSLDNITHVPGGGNKK-LDFKDR-a16-b4	WT_Tau	WT_Tau	intra-protein xl	369	347	22	2636.39	528.286	5	-1.4	3	32.6
DNIKHVPGGGSVQIVYKPVDLSK-KLDLSNVQSK-a4-b1	WT_Tau	WT_Tau	intra-protein xl	298	281	17	3718.03	744.613	5	-1.5	4	32.43
VQSKIGSLDNITHVPGGGNK-LDFKDR-a4-b4	WT_Tau	WT_Tau	intra-protein xl	353	347	6	2950.55	984.524	3	-0.7	3	32.42
IGSLDNITHVPGGGNKK-IGSTENLKHQPGGGK-a16-b8	WT_Tau	WT_Tau	intra-protein xl	369	267	102	3365.77	842.45	4	-0.4	1	32.32
CGSLGNIHHKPGGGQVEVK-KLDLSNVQSKCGSK-a10-b10	WT_Tau	WT_Tau	intra-protein xl	331	290	41	3673.87	919.475	4	0	1	32.14
VQSKIGSLDNITHVPGGGNK-SKIGSTENLK-a4-b2	WT_Tau	WT_Tau	intra-protein xl	353	259	94	3233.72	647.752	5	-1	1	32.05
CGSLGNIHHKPGGGQVEVKSEKLDFK-K19-156	WT_Tau	-	monolink	340	n/a	-	2976.51	745.135	4	-1.1	3	32
VTSKCGSLGNIHHKPGGGQVEVK-SKIGSTENLK-a4-b2	WT_Tau	WT_Tau	intra-protein xl	321	259	62	3601.88	901.479	4	-1.2	3	31.95
HQPGGGKVQIINK-KLDLSNVQSK-a7-b1	WT_Tau	WT_Tau	intra-protein xl	274	281	7	2643.47	882.164	3	-0.7	5	31.85
HVPGGGSVQIVYKPVDLSK-KLDLSNVQSK-a13-b1	WT_Tau	WT_Tau	intra-protein xl	311	281	30	3247.78	650.563	5	-2.1	2	31.7
VQSKIGSLDNITHVPGGGNKK-LDFKDR-a4-b4	WT_Tau	WT_Tau	intra-protein xl	353	347	6	3078.64	616.736	5	-2	2	31.48
CGSKDNIK-SEKLDFK-a4-b3	WT_Tau	WT_Tau	intra-protein xl	294	343	49	1923.96	642.327	3	-1.5	1	31.44
CGSLGNIHHKPGGGQVEVKSEK-LDFKDR-a10-b4	WT_Tau	WT_Tau	intra-protein xl	331	347	16	3247.64	542.281	6	-1.4	1	31.35
CGSLGNIHHKPGGGQVEVK-IGSTENLKHQPGGGK-a10-b8	WT_Tau	WT_Tau	intra-protein xl	331	267	64	3632.84	909.219	4	-0.8	2	31.24
CGSLGNIHHKPGGGQVEVK-VQIINKK-a10-b6	WT_Tau	WT_Tau	intra-protein xl	331	280	51	2952.59	739.156	4	-0.9	3	31.2
DNIKHVPGGGSVQIVYKPVDLSK-SEKLDFK-a4-b3	WT_Tau	WT_Tau	intra-protein xl	298	343	45	3452.85	1151.96	3	-0.7	2	31
NVKSKIGSTENLK-K5-156	WT_Tau	-	monolink	259	n/a	-	1572.87	394.225	4	-1.7	1	30.96
VTSKCGSLGNIHHKPGGGQVEVK-LDLSNVQSKCGSK-a4-b9	WT_Tau	WT_Tau	intra-protein xl	321	290	31	3961.01	991.26	4	-1.2	3	30.77
CGSKDNIKHVPGGGSVQIVYKPVDLSK-K4-K8	WT_Tau	-	intralink	294	298	4	3019.58	755.902	4	-0.6	2	30.76
IGSLDNITHVPGGGNKK-SKIGSTENLK-a16-b2	WT_Tau	WT_Tau	intra-protein xl	369	259	110	2919.56	730.898	4	-1.5	3	30.76
HQPGGGKVQIINK-CGSKDNIK-a7-b4	WT_Tau	WT_Tau	intra-protein xl	274	294	20	2433.28	812.1	3	-1	3	30.73
VQSKIGSLDNITHVPGGGNKK-K4-K20	WT_Tau	-	intralink	353	369	16	2286.23	763.085	3	-0.8	4	30.6
VQSKIGSLDNITHVPGGGNK-KLDLSNVQSK-a4-b1	WT_Tau	WT_Tau	intra-protein xl	353	281	72	3288.77	1097.26	3	-0.5	1	30.48
CGSLGNIHHKPGGGQVEVKSEKLDFK-K10-K22	WT_Tau	-	intralink	331	343	12	2958.5	740.632	4	-1.5	2	30.25
IGSTENLKHQPGGGK-K8-156	WT_Tau	-	monolink	267	n/a	-	1677.87	560.297	3	-0.5	10	29.82
VTSKCGSLGNIHHKPGGGQVEVK-KIETHK-a4-b1	WT_Tau	WT_Tau	intra-protein xl	321	370	49	3280.73	1094.58	3	-2.3	2	29.77
KIETHK-LDFKDR-a1-b4	WT_Tau	WT_Tau	intra-protein xl	370	347	23	1684.91	562.645	3	-1.6	3	29.7
IGSTENLKHQPGGGK-CGSKDNIK-a8-b4	WT_Tau	WT_Tau	intra-protein xl	267	294	27	2580.29	646.081	4	-0.9	3	29.63
HVPGGGSVQIVYKPVDLSKVTSK-K13-156	WT_Tau	-	monolink	311	n/a	-	2550.41	638.611	4	3.1	9	29.62
HVPGGGSVQIVYKPVDLSKVTSK-LDFKDR-a19-b4	WT_Tau	WT_Tau	intra-protein xl	317	347	30	3324.8	665.968	5	-2.1	1	29.52
SEKLDFKDR-K3-156	WT_Tau	-	monolink	343	n/a	-	1292.66	431.894	3	-1.4	4	29.49
VTSKCGSLGNIHHKPGGGQVEVK-KLDLSNVQSK-a4-b1	WT_Tau	WT_Tau	intra-protein xl	321	281	40	3656.93	732.393	5	-1	3	29.26
VTSKCGSLGNIHHKPGGGQVEVK-IGSTENLKHQPGGGK-a4-b8	WT_Tau	WT_Tau	intra-protein xl	321	267	54	4048.09	1013.03	4	-0.3	1	29.03
VTSKCGSLGNIHHKPGGGQVEVK-KLDLSNVQSK-a14-b1	WT_Tau	WT_Tau	intra-protein xl	331	281	50	3656.93	610.496	6	-1	1	28.93
VQIINKK-KIETHK-a6-b1	WT_Tau	WT_Tau	intra-protein xl	280	370	90	1734.04	434.517	4	-1.7	2	28.71
VTSKCGSLGNIHHKPGGGQVEVK-K14-155	WT_Tau	-	monolink	331	n/a	-	2543.32	636.837	4	-5	2	28.53
DNIKHVPGGGSVQIVYKPVDLSK-IGSTENLKHQPGGGK-a4-b8	WT_Tau	WT_Tau	intra-protein xl	298	267	31	4109.19	1028.3	4	-1.2	2	28.46
KIETHKLTFR-K1-K6	WT_Tau	-	intralink	370	375	5	1409.8	470.941	3	-1.9	1	28.34
VQIINKKLDLSNVQSK-K16-156	WT_Tau	-	monolink	290	n/a	-	1982.14	661.721	3	-0.2	3	27.46
HVPGGGSVQIVYKPVDLSKVTSK-K23-156	WT_Tau	-	monolink	321	n/a	-	2550.4	511.088	5	-2.1	7	27.35
VQSKIGSLDNITHVPGGGNKK-SEKLDFK-a4-b3	WT_Tau	WT_Tau	intra-protein xl	353	343	10	3151.68	788.929	4	-1.6	1	27.27
HQPGGGKVQIINK-SQVNSLDLKK-a7-b9	WT_Tau	reverse_WT_Tau	intra-protein xl	274	161	113	2643.47	529.701	5	-1.4	2	27.1
VTSKCGSLGNIHHKPGGGQVEVK-SEKLDFKDR-a4-b3	WT_Tau	WT_Tau	intra-protein xl	321	343	22	3662.88	916.729	4	-0.3	2	27.05
KNIIQVKGGGPQHK-K7-K14	reverse_WT_Tau	-	intralink	168	175	7	1640.93	547.986	3	-1.3	3	26.88
VQIINKKLDLSNVQSK-K6-156	WT_Tau	-	monolink	280	n/a	-	1982.14	496.542	4	-1.9	3	26.87
HVPGGGSVQIVYKPVDLSK-K19-156	WT_Tau	-	monolink	317	n/a	-	2135.16	712.728	3	-1	12	26.82
DNIKHVPGGGSVQIVYKPVDLSK-K4-K23	WT_Tau	-	intralink	298	317	19	2587.4	647.857	4	-1	2	26.78
VQSKIGSLDNITHVPGGGNK-HVPGGGSVQIVYKPVDLSK-a4-b13	WT_Tau	WT_Tau	intra-protein xl	353	311	42	4137.22	828.451	5	-1.4	4	26.52
IGSLDNITHVPGGGNKK-SEKLDFKDR-a16-b3	WT_Tau	WT_Tau	intra-protein xl	369	343	26	2980.56	597.119	5	-1.2	1	26.02
HVPGGGSVQIVYKPVDLSK-SGCKSQVNSLDLKK-a13-b13	WT_Tau	reverse_WT_Tau	intra-protein xl	311	161	150	3679.96	737	5	-0.5	1	26.01
CGSLGNIHHKPGGGQVEVK-KIETHK-a10-b1	WT_Tau	WT_Tau	intra-protein xl	331	370	39	2865.49	574.106	5	-0.4	2	25.97
CGSLGNIHHKPGGGQVEVK-TKIATPR-a10-b2	WT_Tau	WT_Tau	intra-protein xl	331	150	181	2896.52	725.138	4	-4.8	1	25.92
CGSLGNIHHKPGGGQVEVKSEK-K10-K19	WT_Tau	-	intralink	331	340	9	2455.22	614.814	4	-1	18	25.9
VQSKIGSLDNITHVPGGGNKK-K4-K21	WT_Tau	-	intralink	353	370	17	2286.23	763.085	3	-0.8	4	25.88
DGSKPPEGSSPPTKPAPPTK-HVPGGGSVQIVYKPVDLSK-a14-b13	reverse_WT_Tau	WT_Tau	intra-protein xl	262	311	49	4091.14	682.865	6	-4.4	4	25.46
VQSKIGSLDNITHVPGGGNK-CGSLGNIHHKPGGGQVEVK-a4-b10	WT_Tau	WT_Tau	intra-protein xl	353	331	22	4131.12	1033.79	4	-0.7	1	25.36
VTSKCGSLGNIHHKPGGGQVEVK-HVPGGGSVQIVYKPVDLSK-a14-b13	WT_Tau	WT_Tau	intra-protein xl	331	311	20	4505.38	751.904	6	-1.4	2	25.32
HVPGGGSVQIVYKPVDLSK-INDKSGCK-a13-b4	WT_Tau	reverse_WT_Tau	intra-protein xl	311	148	163	3037.59	608.525	5	-1.3	1	25.27
DNIKHVPGGGSVQIVYKPVDLSK-K4-K17	WT_Tau	-	intralink	298	311	13	2587.4	863.473	3	-1.8	6	24.8
VTSKCGSLGNIHHKPGGGQVEVKSEK-K4-K23	WT_Tau	-	intralink	321	340	19	2870.47	957.829	3	-2.1	4	24.69
KIETHKLTFR-K6-156	WT_Tau	-	monolink	375	n/a	-	1427.81	357.96	4	-2.4	1	24.27
CGSKDNIKHVPGGGSVQIVYKPVDLSK-K8-155	WT_Tau	-	monolink	298	n/a	-	3036.6	760.159	4	-1.5	1	24.08
DNIKHVPGGGSVQIVYKPVDLSK-CGSLGNIHHKPGGGQVEVK-a4-b10	WT_Tau	WT_Tau	intra-protein xl	298	331	33	4560.39	1141.11	4	-0.7	1	24.06
CGSLGNIHHKPGGGQVEVK-SEKLDFKDR-a10-b7	WT_Tau	WT_Tau	intra-protein xl	331	347	16	3247.64	650.536	5	-0.4	1	23.98
DGSKPPEGSSPPTKPAPPTK-VQSKIGSLDNITHVPGGGNK-a4-b4	reverse_WT_Tau	WT_Tau	intra-protein xl	252	353	101	4132.13	1378.38	3	-4.3	1	23.97
IGSTENLKHQPGGGK-SEKLDFKDR-a8-b7	WT_Tau	WT_Tau	intra-protein xl	267	347	80	2796.44	933.154	3	-1	1	23.89
SKIGSTENLKHQPGGGK-K10-156	WT_Tau	-	monolink	267	n/a	-	1892.99	632.006	3	-1.2	3	23.87
VQSKIGSLDNITHVPGGGNK-LDLSNVQSKCGSK-a4-b9	WT_Tau	WT_Tau	intra-protein xl	353	290	63	3592.84	1198.62	3	-2	2	23.87
CGSLGNIHHKPGGGQVEVKSEK-K22-155	WT_Tau	-	monolink	343	n/a	-	2472.25	825.092	3	-1.9	2	23.82
CGSKDNIKHVPGGGSVQIVYKPVDLSK-K4-155	WT_Tau	-	monolink	294	n/a	-	3036.6	760.159	4	-1.3	1	23.81
SQVNSLDLKK-CGSKDNIK-a9-b4	reverse_WT_Tau	WT_Tau	intra-protein xl	161	294	133	2189.14	548.292	4	-0.7	8	23.62
GGGPQHKLNETSGIK-K7-K15	reverse_WT_Tau	-	intralink	175	183	8	1659.86	554.294	3	-0.6	3	23.53
CGSKDNIKHVPGGGSVQIVYKPVDLSK-K4-156	WT_Tau	-	monolink	294	n/a	-	3037.59	608.525	5	-0.9	9	23.46
DNIKHVPGGGSVQIVYKPVDLSK-LDLSNVQSKCGSK-a4-b9	WT_Tau	WT_Tau	intra-protein xl	298	290	8	4022.11	1006.54	4	-1	1	23.26
CGSLGNIHHKPGGGQVEVK-HVPGGGSVQIVYKPVDLSK-a10-b13	WT_Tau	WT_Tau	intra-protein xl	331	311	20	4090.14	819.036	5	-0.8	6	23.21
IGSTENLKHQPGGGK-K8-K15	WT_Tau	-	intralink	267	274	7	1659.86	554.294	3	0.2	4	22.88
CGSLGNIHHKPGGGQVEVK-IGSLDNITHVPGGGNKK-a10-b16	WT_Tau	WT_Tau	intra-protein xl	331	369	38	3816.96	955.249	4	-1.6	4	22.86
IGSLDNITHVPGGGNKK-HQPGGGKVQIINK-a16-b7	WT_Tau	WT_Tau	intra-protein xl	369	274	95	3218.75	805.695	4	-1.4	9	22.78
SKIGSTENLKHQPGGGK-K2-K10	WT_Tau	-	intralink	259	267	8	1874.98	626.002	3	-1.2	6	22.56
VQSKIGSLDNITHVPGGGNK-HQPGGGKVQIINK-a4-b7	WT_Tau	WT_Tau	intra-protein xl	353	274	79	3532.91	884.234	4	-1.8	2	22.5
VTSKCGSLGNIHHKPGGGQVEVK-HVPGGGSVQIVYKPVDLSK-a4-b13	WT_Tau	WT_Tau	intra-protein xl	321	311	10	4505.38	644.634	7	-1.1	5	22.5
KLDLSNVQSKCGSK-NVKSKIGSTENLK-a10-b5	WT_Tau	WT_Tau	intra-protein xl	290	259	31	3117.67	780.424	4	-1.2	8	22.31
DGSKPPEGSSPPTKPAPPTK-KLDLSNVQSKCGSK-a4-b10	reverse_WT_Tau	WT_Tau	intra-protein xl	252	290	38	3674.87	919.725	4	-3.7	1	22.22
CGSLGNIHHKPGGGQVEVKSEK-K22-156	WT_Tau	-	monolink	343	n/a	-	2473.24	825.42	3	-0.6	1	21.79
DGSKPPEGSSPPTKPAPPTK-HVPGGGSVQIVYKPVDLSK-a4-b13	reverse_WT_Tau	WT_Tau	intra-protein xl	252	311	59	4091.14	819.235	5	-5	3	21.71
HVPGGGSVQIVYKPVDLSK-CGSKDNIK-a13-b4	WT_Tau	WT_Tau	intra-protein xl	311	294	17	3037.59	760.404	4	-1.6	5	21.7
IGSTENLKHQPGGGK-SQVNSLDLKK-a8-b9	WT_Tau	reverse_WT_Tau	intra-protein xl	267	161	106	2790.49	698.629	4	-0.5	6	21.52
HQPGGGKVQIINK-K7-K13	WT_Tau	-	intralink	274	280	6	1512.84	505.289	3	0.7	2	21.3
SEKLDFKDR-KIETHK-a7-b1	WT_Tau	WT_Tau	intra-protein xl	347	370	23	2029.08	508.278	4	-0.9	1	20.83
LDFKDRVQSK-K4-156	WT_Tau	-	monolink	347	n/a	-	1390.74	464.589	3	-2.1	1	19.98
HVPGGGSVQIVYKPVDLSK-SEKLDFKDR-a13-b3	WT_Tau	WT_Tau	intra-protein xl	311	343	32	3253.73	814.44	4	-1.2	2	19.78
VTSKCGSLGNIHHKPGGGQVEVK-HQPGGGKVQIINK-a4-b7	WT_Tau	WT_Tau	intra-protein xl	321	274	47	3901.06	781.22	5	-3.9	2	19.75
HVPGGGSVQIVYKPVDLSKVTSK-K13-K23	WT_Tau	-	intralink	311	321	10	2532.39	845.139	3	-1	8	19.75
DNIKHVPGGGSVQIVYKPVDLSKVTSK-K4-K23	WT_Tau	-	intralink	298	317	19	3002.64	751.668	4	-0.6	4	19.44
VTSKCGSLGNIHHKPGGGQVEVK-K4-K23	WT_Tau	-	intralink	321	340	19	2526.3	632.583	4	-0.4	9	19.35
HVPGGGSVQIVYKPVDLSKVTSKCGSLGNIHHKPGGGQVEVK-K33-K42	WT_Tau	-	intralink	331	340	9	4487.37	748.903	6	-0.6	1	19
CGSLGNIHHKPGGGQVEVKSEK-FTLKHTEIKK-a19-b9	WT_Tau	reverse_WT_Tau	intra-protein xl	340	72	268	3698.95	740.798	5	-1.2	2	18.81
GDAGKAK-GDAGKAK-a5-b5	reverse_WT_Tau	reverse_WT_Tau	intra-protein xl	299	299	0	1428.76	477.262	3	2.6	1	18.59
TANAQGKQGPPAAGRPTAIK-TPPAPKTPPSSGEPPK-a7-b6	reverse_WT_Tau	WT_Tau	intra-protein xl	279	180	99	3657.93	915.491	4	-4.4	3	17.85
DGSKPPEGSSPPTKPAPPTK-IGSLDNITHVPGGGNKK-a4-b16	reverse_WT_Tau	WT_Tau	intra-protein xl	252	369	117	3817.97	764.602	5	-3.8	2	17.69
IGSLDNITHVPGGGNKK-KLDLSNVQSK-a16-b1	WT_Tau	WT_Tau	intra-protein xl	369	281	88	2974.6	595.929	5	-1.5	1	17.43
HVPGGGSVQIVYKPVDLSK-IGSTENLKHQPGGGK-a13-b8	WT_Tau	WT_Tau	intra-protein xl	311	267	44	3638.94	910.742	4	-1.3	3	17.18
LDLSNVQSKCGSK-STVKSLDVPK-a9-b4	WT_Tau	reverse_WT_Tau	intra-protein xl	290	125	165	2645.41	882.81	3	4.4	2	17.02
VTSKCGSLGNIHHKPGGGQVEVK-VQSKIGSLDNITHVPGGGNK-a4-b4	WT_Tau	WT_Tau	intra-protein xl	321	353	32	4546.37	910.282	5	-0.5	2	17.01
IGSLDNITHVPGGGNKKIETHK-K17-156	WT_Tau	-	monolink	370	n/a	-	2470.32	495.071	5	-1.4	3	16.97
HVPGGGSVQIVYKPVDLSKVTSKCGSLGNIHHKPGGGQVEVK-K19-K23	WT_Tau	-	intralink	317	321	4	4487.38	1122.85	4	0.6	1	16.77
DGSKPPEGSSPPTKPAPPTK-IGSLDNITHVPGGGNKK-a14-b16	reverse_WT_Tau	WT_Tau	intra-protein xl	262	369	107	3817.97	764.602	5	-3.8	3	16.71
VTSKCGSLGNIHHKPGGGQVEVK-SQVNSLDLKK-a4-b9	WT_Tau	reverse_WT_Tau	intra-protein xl	321	161	160	3656.93	732.393	5	-1	1	16.34
KAKGADGK-AKGADGK-a3-b2	WT_Tau	WT_Tau	intra-protein xl	143	143	0	1556.85	519.959	3	1	1	16.3
SKIGSTENLKHQPGGGK-K2-K17	WT_Tau	-	intralink	259	274	15	1874.98	626.002	3	-1.3	6	16.23
KIETHKLTFR-K1-156	WT_Tau	-	monolink	370	n/a	-	1427.81	476.945	3	-2	1	16.07
FDLKESKVEVQGGGPK-ASSPSKPPTR-a7-b6	reverse_WT_Tau	reverse_WT_Tau	intra-protein xl	102	208	106	2881.53	721.39	4	3.5	1	15.98
IGSLDNITHVPGGGNKKIETHK-K16-K22	WT_Tau	-	intralink	369	375	6	2452.3	614.084	4	-1	3	15.89
KLDLSNVQSK-INDKSGCK-a1-b4	WT_Tau	reverse_WT_Tau	intra-protein xl	281	148	133	2189.14	548.292	4	-0.4	2	15.87
SQVNSLDLKK-INDKSGCK-a9-b4	reverse_WT_Tau	reverse_WT_Tau	intra-protein xl	161	148	13	2189.13	548.291	4	-1.4	3	15.84
KLDLSNVQSKCGSK-NVKSKIGSTENLK-a1-b5	WT_Tau	WT_Tau	intra-protein xl	281	259	22	3117.67	780.424	4	-1.2	1	15.84
VQSKIGSLDNITHVPGGGNK-LNETSGIKSK-a4-b8	WT_Tau	reverse_WT_Tau	intra-protein xl	353	183	170	3233.72	647.752	5	-1	1	15.63
VNKLDPXPVPATQLR-LNETSGIKSKVNK-a3-b10	reverse_WT_Tau	reverse_WT_Tau	intra-protein xl	188	185	3	3248.8	813.207	4	4.7	1	15.44
VTSKCGSLGNIHHKPGGGQVEVKSEK-K4-K26	WT_Tau	-	intralink	321	343	22	2870.47	718.626	4	0.6	1	15.37
YVIQVSGGGPVHKINDKSGCK-ESKVEVQGGGPK-a17-b3	reverse_WT_Tau	reverse_WT_Tau	intra-protein xl	148	102	46	3593.84	899.468	4	-2.6	1	15.24
DNIKHVPGGGSVQIVYKPVDLSK-HQPGGGKVQIINK-a4-b7	WT_Tau	WT_Tau	intra-protein xl	298	274	24	3962.17	793.442	5	-0.4	1	15.15
SKIGSTENLKHQPGGGK-LNETSGIKSK-a2-b8	WT_Tau	reverse_WT_Tau	intra-protein xl	259	183	76	2950.59	591.125	5	4.2	2	15.13
KLDLSNVQSKCGSK-K1-K14	WT_Tau	-	intralink	281	294	13	1700.87	567.966	3	-2	3	14.99
KLDLSNVQSK-K1-K10	WT_Tau	-	intralink	281	290	9	1268.69	423.906	3	-1.8	2	14.93
HVPGGGSVQIVYKPVDLSK-SKIGSTENLK-a13-b2	WT_Tau	WT_Tau	intra-protein xl	311	259	52	3192.73	1065.25	3	-3	1	14.65
HHINGLSGCKSTVK-K10-156	reverse_WT_Tau	-	monolink	121	n/a	-	1692.86	424.222	4	-1.9	1	14.61
GDAGKAKK-GDAGKAK-a5-b5	reverse_WT_Tau	reverse_WT_Tau	intra-protein xl	299	299	0	1556.85	519.959	3	1	1	14.54
HVPGGGSVQIVYKPVDLSKVTSK-SKIGSTENLK-a19-b2	WT_Tau	WT_Tau	intra-protein xl	317	259	58	3607.98	1203.67	3	-0.6	2	14.41
GDAGKAKK-GDAGKAK-a7-b5	reverse_WT_Tau	reverse_WT_Tau	intra-protein xl	301	299	2	1556.85	519.959	3	1	1	14.3
HVPGGGSVQIVYKPVDLSK-KLDLSNVQSKCGSK-a13-b10	WT_Tau	WT_Tau	intra-protein xl	311	290	21	3679.96	920.998	4	-0.2	1	14.26
SLDVPKYVIQVSGGGPVHK-K19-155	reverse_WT_Tau	-	monolink	144	n/a	-	2134.17	712.399	3	-2.8	5	13.88
DGSKPPEGSSPPTKPAPPTK-HQPGGGKVQIINK-a4-b7	reverse_WT_Tau	WT_Tau	intra-protein xl	252	274	22	3486.83	1163.29	3	-4	1	13.83
HQPGGGKVQIINKK-K7-K13	WT_Tau	-	intralink	274	280	6	1640.93	547.986	3	-1.3	1	13.81
SQVNSLDLKK-K9-K10	reverse_WT_Tau	-	intralink	161	162	1	1268.7	423.906	3	-1.6	1	13.79
HVPGGGSVQIVYKPVDLSKVTSKCGSLGNIHHKPGGGQVEVK-K19-K42	WT_Tau	-	intralink	317	340	23	4487.37	898.482	5	-0.7	1	13.64
HVPGGGSVQIVYKPVDLSKVTSK-KLDLSNVQSK-a19-b1	WT_Tau	WT_Tau	intra-protein xl	317	281	36	3663.02	916.763	4	-1.1	5	13.32
HVPGGGSVQIVYKPVDLSK-K19-155	WT_Tau	-	monolink	317	n/a	-	2134.18	712.4	3	-1.6	8	13.27
SEKLDFKDR-K7-156	WT_Tau	-	monolink	347	n/a	-	1292.66	431.894	3	-2.3	4	13.26
SQVNSLDLKKNIIQVK-K9-K16	reverse_WT_Tau	-	intralink	161	168	7	1964.13	655.717	3	-1.5	1	13.21
CGSLGNIHHKPGGGQVEVK-K10-K19	WT_Tau	-	intralink	331	340	9	2111.05	528.772	4	-1.5	20	13.17
CGSKDNIKHVPGGGSVQIVYKPVDLSK-K8-156	WT_Tau	-	monolink	298	n/a	-	3037.61	760.409	4	4.6	5	13.08
VTSKCGSLGNIHHKPGGGQVEVKSEK-K23-156	WT_Tau	-	monolink	340	n/a	-	2888.48	723.127	4	-1	2	12.99
SRLQTAPVPMPDLKNVK-INDKSGCK-a14-b4	WT_Tau	reverse_WT_Tau	intra-protein xl	254	148	106	2951.55	591.318	5	-2.2	1	12.95
IATPRGAAPPGQKGQANATR-ESKVEVQGGGPK-a13-b3	WT_Tau	reverse_WT_Tau	intra-protein xl	163	102	61	3312.76	829.199	4	2.8	2	12.71
VEVQGGGPKHHINGLSGCK-K9-K19	reverse_WT_Tau	-	intralink	111	121	10	2111.05	528.771	4	-1.9	16	12.64
SKVNKLDPMPVPATQLR-INDKSGCK-a5-b4	reverse_WT_Tau	reverse_WT_Tau	intra-protein xl	188	148	40	2951.55	738.896	4	-1.1	2	12.62
GAAPPGQKGQANATR-NIIQVKGGGPQHK-a8-b6	WT_Tau	reverse_WT_Tau	intra-protein xl	163	168	5	2935.57	588.121	5	-2.8	1	12.56
ESKVEVQGGGPK-LDFKDR-a3-b4	reverse_WT_Tau	WT_Tau	intra-protein xl	102	347	245	2144.11	715.711	3	-0.8	1	12.55
DKFDLK-MVSKSK-a2-b4	reverse_WT_Tau	WT_Tau	intra-protein xl	95	130	35	1580.85	527.959	3	3.6	1	12.37
GGGPQHKLNETSGIKSK-LNETSGIKSK-a7-b8	reverse_WT_Tau	reverse_WT_Tau	intra-protein xl	175	183	8	2950.57	591.123	5	0.8	1	12.16
DGSKPPEGSSPPTKPAPPTKAPIR-DKFDLKESK-a20-b6	reverse_WT_Tau	reverse_WT_Tau	intra-protein xl	268	99	169	3657.93	915.491	4	1.8	1	12.15
HVPGGGSVQIVYKPVDLSKVTSK-DGSKPPEGSSPPTKPAPPTK-a13-b4	WT_Tau	reverse_WT_Tau	intra-protein xl	311	252	59	4506.38	902.284	5	-4	1	12.06
SLDVPKYVIQVSGGGPVHKINDK-K23-155	reverse_WT_Tau	-	monolink	148	n/a	-	2604.42	869.149	3	-1.9	1	12.04
HVPGGGSVQIVYKPVDLSK-TPSLPTPPTREPKK-a13-b13	WT_Tau	WT_Tau	intra-protein xl	311	224	87	3665.03	1222.68	3	3.2	1	11.94
LDLSNVQSKCGSKDNIK-VQIINKK-a9-b6	WT_Tau	WT_Tau	intra-protein xl	290	280	10	2884.57	722.151	4	0.8	1	11.89
IETHKLTFR-DKFDLK-a5-b2	WT_Tau	reverse_WT_Tau	intra-protein xl	375	95	280	2046.12	683.048	3	2.7	2	11.79
YVIEAGHDTKAK-MVSKSK-a10-b4	reverse_WT_Tau	WT_Tau	intra-protein xl	57	130	73	2147.12	537.788	4	-3.3	1	11.64
GADGKTKIATPR-XVSKSK-a5-b4	WT_Tau	WT_Tau	intra-protein xl	148	130	18	2046.12	683.049	3	4.6	1	11.61
IPAKTPPAPKTPPSSGEPPK-K4-K10	WT_Tau	-	intralink	174	180	6	2134.18	712.4	3	4.8	2	11.6
KNGGGPVHTINDLSGIKSQVR-K17-155	reverse_WT_Tau	-	monolink	89	n/a	-	2331.26	583.822	4	-4.7	2	11.41
VEVQGGGPKHHINGLSGCK-K9-156	reverse_WT_Tau	-	monolink	111	n/a	-	2129.07	533.275	4	-0.2	1	11.39
KLDLSNVQSKCGSK-NVKSKIGSTENLK-a10-b3	WT_Tau	WT_Tau	intra-protein xl	290	257	33	3117.67	1040.23	3	-1.5	5	11.32
SKIGSTENLKHQPGGGK-TPPKSPSSAKSR-a2-b10	WT_Tau	WT_Tau	intra-protein xl	259	240	19	3116.66	624.339	5	0	5	11.3
SGCKSQVNSLDLKK-LNETSGIKSKVNK-a13-b8	reverse_WT_Tau	reverse_WT_Tau	intra-protein xl	161	183	22	3117.66	624.54	5	-2.4	1	11.29
AKKDDSGTGDK-IPAKTPPAPK-a3-b4	reverse_WT_Tau	WT_Tau	intra-protein xl	302	174	128	2277.23	570.315	4	3.2	2	11.25
LDLSNVQSKCGSK-IPAKTPPAPK-a9-b4	WT_Tau	WT_Tau	intra-protein xl	290	174	116	2591.39	648.855	4	-3.7	2	11.17
AKTDHGAEIVYKSPVVSGDTSPR-KLDLSNVQSKCGSK-a2-b1	WT_Tau	WT_Tau	intra-protein xl	385	281	104	4114.1	823.827	5	-0.9	1	11.16
GGGPQHKLNETSGIKSK-SKASSPSKPPTR-a7-b2	reverse_WT_Tau	reverse_WT_Tau	intra-protein xl	175	202	27	3116.66	520.451	6	0.3	2	11.07
SKASSPSKPPTR-HTEIKK-a2-b5	reverse_WT_Tau	reverse_WT_Tau	intra-protein xl	202	72	130	2134.18	712.401	3	1.8	4	11.07
APIRTANAQGKQGPPAAGRPTAIK-MVSKSKDGTGSDDK-a11-b4	reverse_WT_Tau	WT_Tau	intra-protein xl	279	130	149	3962.05	991.521	4	-2.6	1	10.84
VQSKIGSLDNITHVPGGGNKK-LDFKDR-a20-b4	WT_Tau	WT_Tau	intra-protein xl	369	347	22	3078.64	616.736	5	-2	1	10.84
NGGGPVHTINDLSGIKSQVR-DKFDLKESK-a16-b2	reverse_WT_Tau	reverse_WT_Tau	intra-protein xl	89	95	6	3294.72	824.688	4	-0.6	4	10.67
TPPKSPSSAKSR-KIETHK-a10-b1	WT_Tau	WT_Tau	intra-protein xl	240	370	130	2134.18	712.4	3	1.1	2	10.59
HHINGLSGCKSTVK-ESKVEVQGGGPK-a10-b3	reverse_WT_Tau	reverse_WT_Tau	intra-protein xl	121	102	19	2888.48	723.127	4	-1.1	2	10.49
SKASSPSKPPTR-KIETHK-a8-b1	reverse_WT_Tau	WT_Tau	intra-protein xl	208	370	162	2134.18	712.4	3	0.3	3	10.39
DNIKHVPGGGSVQIVYKPVDLSKVTSK-K23-156	WT_Tau	-	monolink	317	n/a	-	3020.65	605.138	5	-0.8	1	10.39
CGSLGNIHHKPGGGQVEVKSEK-K19-K22	WT_Tau	-	intralink	340	343	3	2455.23	614.815	4	-0.1	2	10.31
VTSKCGSLGNIHHKPGGGQVEVK-SPSSAKSR-a14-b6	WT_Tau	WT_Tau	intra-protein xl	331	240	91	3344.73	837.189	4	0	2	10.16
GGGPQHKLNETSGIKSK-SKASSPSKPPTR-a15-b8	reverse_WT_Tau	reverse_WT_Tau	intra-protein xl	183	208	25	3116.66	624.339	5	0	1	10.11
SKASSPSKPPTR-KIETHK-a2-b1	reverse_WT_Tau	WT_Tau	intra-protein xl	202	370	168	2134.18	712.401	3	1.8	10	10.08
GAAPPGQKGQANATR-LNETSGIKSK-a8-b8	WT_Tau	reverse_WT_Tau	intra-protein xl	163	183	20	2636.39	660.105	4	0.4	2	10.07
SPSSAKSRLQTAPVPMPDLK-NVKSKIGSTENLK-a6-b5	WT_Tau	WT_Tau	intra-protein xl	240	259	19	3663.99	1222.34	3	-0.5	1	10.04
DNIKHVPGGGSVQIVYKPVDLSK-K23-156	WT_Tau	-	monolink	317	n/a	-	2605.41	652.359	4	-2.6	4	9.97
HVPGGGSVQIVYKPVDLSKVTSK-CGSLGNIHHKPGGGQVEVK-a13-b10	WT_Tau	WT_Tau	intra-protein xl	311	331	20	4505.38	751.905	6	-0.7	1	9.82
IGSLDNITHVPGGGNKKIETHK-K16-156	WT_Tau	-	monolink	369	n/a	-	2470.32	495.071	5	-1.3	1	9.7
SLDVPKYVIQVSGGGPVHK-K6-156	reverse_WT_Tau	-	monolink	131	n/a	-	2135.17	712.73	3	2.5	25	9.66
NIIQVKGGGPQHK-KDDSGTGDKSK-a6-b1	reverse_WT_Tau	reverse_WT_Tau	intra-protein xl	168	302	134	2649.37	663.35	4	-1.5	1	9.61
TDHGAEIVYKSPVVSGDTSPR-AKANERFTLK-a10-b2	WT_Tau	reverse_WT_Tau	intra-protein xl	395	59	336	3528.83	883.216	4	2.8	3	9.61
VEVQGGGPKHHINGLSGCKSTVK-K9-156	reverse_WT_Tau	-	monolink	111	n/a	-	2544.31	637.085	4	-0.5	1	9.56
SKASSPSKPPTR-AKKDDSGTGDK-a2-b3	reverse_WT_Tau	reverse_WT_Tau	intra-protein xl	202	302	100	2500.28	834.434	3	0.8	2	9.51
DQGGYTXHQDQEGDTDAGLKESPLQTPTEDGSEEPGSETSDAK-LQTAPVPXPDLKNVKSK-a20-b15	WT_Tau	WT_Tau	intra-protein xl	44	257	213	6572.03	1315.41	5	2.3	1	9.46
TPPKSPSSAKSR-KIETHK-a4-b1	WT_Tau	WT_Tau	intra-protein xl	234	370	136	2134.17	712.399	3	-0.1	4	9.37
SLDVPKYVIQVSGGGPVHK-K6-155	reverse_WT_Tau	-	monolink	131	n/a	-	2134.18	712.4	3	-1.2	6	9.33
HVPGGGSVQIVYKPVDLSK-IGSLDNITHVPGGGNKK-a13-b16	WT_Tau	WT_Tau	intra-protein xl	311	369	58	3823.06	956.773	4	-0.6	1	9.22
HVPGGGSVQIVYKPVDLSKVTSK-GGGPQHKLNETSGIK-a13-b7	WT_Tau	reverse_WT_Tau	intra-protein xl	311	175	136	4054.18	811.844	5	-1	1	9.17
IGSLDNITHVPGGGNKK-YVIEAGHDTKAK-a16-b10	WT_Tau	reverse_WT_Tau	intra-protein xl	369	57	312	3174.68	1059.23	3	4.2	1	9.13
CGSLGNIHHKPGGGQVEVK-K19-156	WT_Tau	-	monolink	340	n/a	-	2129.07	710.697	3	-0.6	4	9.09
IGSTENLKHQPGGGK-K15-156	WT_Tau	-	monolink	274	n/a	-	1677.87	560.297	3	-1.5	1	9.07
HVPGGGSVQIVYKPVDLSKVTSK-CGSLGNIHHKPGGGQVEVK-a19-b10	WT_Tau	WT_Tau	intra-protein xl	317	331	14	4505.39	1127.36	4	0.5	1	9.03
TPPKSPSSAKSR-HTEIKK-a4-b5	WT_Tau	reverse_WT_Tau	intra-protein xl	234	72	162	2134.17	712.399	3	-0.1	3	9
SKASSPSKPPTRVVAVK-AKANERFTLK-a8-b2	reverse_WT_Tau	reverse_WT_Tau	intra-protein xl	208	59	149	3052.74	1018.59	3	1	1	8.97
VQSKIGSLDNITHVPGGGNKK-LTFRENAKAK-a20-b8	WT_Tau	WT_Tau	intra-protein xl	369	383	14	3462.88	866.728	4	-3.6	2	8.88
ESKVEVQGGGPK-DGTGSDDKKAK-a3-b9	reverse_WT_Tau	WT_Tau	intra-protein xl	102	141	39	2472.22	825.083	3	-4.2	2	8.73
TPPKSPSSAKSR-YVIEAGHDTKAK-a4-b10	WT_Tau	reverse_WT_Tau	intra-protein xl	234	57	177	2710.43	904.484	3	0	2	8.6
SKIGSTENLKHQPGGGK-SKASSPSKPPTR-a2-b2	WT_Tau	reverse_WT_Tau	intra-protein xl	259	202	57	3116.66	780.173	4	0.4	4	8.54
HVPGGGSVQIVYKPVDLSK-HQPGGGKVQIINK-a13-b7	WT_Tau	WT_Tau	intra-protein xl	311	274	37	3491.92	1164.98	3	-1.6	2	8.53
VQSKIGSLDNITHVPGGGNKK-FDLKESK-a20-b4	WT_Tau	reverse_WT_Tau	intra-protein xl	369	99	270	3151.68	631.344	5	-1.7	1	8.49
SKIGSTENLKHQPGGGK-LNETSGIKSK-a10-b8	WT_Tau	reverse_WT_Tau	intra-protein xl	267	183	84	2950.57	738.65	4	-0.6	1	8.34
STVKSLDVPK-KIETHK-a4-b1	reverse_WT_Tau	WT_Tau	intra-protein xl	125	370	245	1965.11	656.046	3	-0.1	1	8.3
KAKGADGK-AKGADGK-a1-b2	WT_Tau	WT_Tau	intra-protein xl	141	143	2	1556.85	519.959	3	1	1	8.29
CGSLGNIHHKPGGGQVEVK-TPSLPTPPTREPKK-a10-b13	WT_Tau	WT_Tau	intra-protein xl	331	224	107	3658.93	1220.65	3	2.5	1	8.27
SGCKSQVNSLDLKK-IPAKTPPAPK-a4-b4	reverse_WT_Tau	WT_Tau	intra-protein xl	152	174	22	2719.48	680.879	4	-3.8	1	8.26
INDKSGCKSQVNSLDLK-LNETSGIKSKVNK-a4-b10	reverse_WT_Tau	reverse_WT_Tau	intra-protein xl	148	185	37	3459.81	865.961	4	-3.9	1	8.2
GGGPQHKLNETSGIKSK-TPPKSPSSAKSR-a7-b10	reverse_WT_Tau	WT_Tau	intra-protein xl	175	240	65	3116.66	624.339	5	0	3	8.18
HHINGLSGCKSTVK-FTLKHTEIK-a10-b4	reverse_WT_Tau	reverse_WT_Tau	intra-protein xl	121	67	54	2790.49	698.629	4	0	2	8.17
LDLSNVQSKCGSKDNIK-KPERTPPTPLSPTRSR-a13-b1	WT_Tau	reverse_WT_Tau	intra-protein xl	294	218	76	3862.05	966.52	4	3	2	8.15
KLDLSNVQSKCGSK-NVKSKIGSTENLK-a1-b3	WT_Tau	WT_Tau	intra-protein xl	281	257	24	3117.66	1040.23	3	-3.2	6	8.02
ESKVEVQGGGPK-VVAVKKPER-a3-b5	reverse_WT_Tau	reverse_WT_Tau	intra-protein xl	102	217	115	2376.34	793.12	3	-0.6	5	7.99
KLDLSNVQSKCGSK-LNETSGIKSKVNK-a1-b10	WT_Tau	reverse_WT_Tau	intra-protein xl	281	185	96	3117.66	1040.23	3	-3.5	4	7.98
KPERTPPTPLSPTRSR-SKDGTGSDDKK-a1-b10	reverse_WT_Tau	WT_Tau	intra-protein xl	218	140	78	3093.61	1032.21	3	2.7	8	7.96
KDQGGYTXHQDQEGDTDAGLKESPLQTPTEDGSEEPGSETSDAK-KPERTPPTPLSPTRSR-a21-b1	WT_Tau	reverse_WT_Tau	intra-protein xl	44	218	174	6638.06	1328.62	5	-1.9	6	7.95
SKIGSTENLKHQPGGGK-SKASSPSKPPTR-a10-b2	WT_Tau	reverse_WT_Tau	intra-protein xl	267	202	65	3116.66	780.172	4	0.1	2	7.85
VNKLDPMPVPATQLRSK-KLDLSNVQSK-a3-b1	reverse_WT_Tau	WT_Tau	intra-protein xl	188	281	93	3161.74	633.356	5	-3	2	7.81
LDFKDRVQSK-SEKLDFKDR-a4-b3	WT_Tau	WT_Tau	intra-protein xl	347	343	4	2509.32	628.339	4	3.1	3	7.79
IPAKTPPAPKTPPSSGEPPK-K4-K20	WT_Tau	-	intralink	174	190	16	2134.17	712.399	3	3.2	6	7.78
NGGGPVHTINDLSGIKSQVRDK-AKANERFTLK-a16-b2	reverse_WT_Tau	reverse_WT_Tau	intra-protein xl	89	59	30	3605.94	902.492	4	2.9	1	7.75
DRVQSKIGSLDNITHVPGGGNK-SQVNSLDLKK-a6-b9	WT_Tau	reverse_WT_Tau	intra-protein xl	353	161	192	3559.91	890.984	4	2.4	3	7.7
YVIQVSGGGPVHKINDK-KIETHKLTFR-a13-b1	reverse_WT_Tau	WT_Tau	intra-protein xl	144	370	226	3219.77	1074.26	3	-2.9	18	7.65
ADSTESGPEESGDETPTQLPSEKLGADTDGEQDQHXTYGGQDK-LQTAPVPXPDLKNVKSK-a23-b15	reverse_WT_Tau	WT_Tau	intra-protein xl	398	257	141	6572.03	1315.41	5	2.3	3	7.64
FDLKESKVEVQGGGPK-ASSPSKPPTR-a4-b6	reverse_WT_Tau	reverse_WT_Tau	intra-protein xl	99	208	109	2881.51	721.386	4	-1.5	1	7.45
VQIINKKLDLSNVQSK-SKSVXR-a7-b2	WT_Tau	reverse_WT_Tau	intra-protein xl	281	312	31	2686.5	672.634	4	-0.8	1	7.41
STVKSLDVPK-SKSVXR-a4-b2	reverse_WT_Tau	reverse_WT_Tau	intra-protein xl	125	312	187	1933.05	645.359	3	-1.3	1	7.38
KLDLSNVQSKCGSK-LNETSGIKSKVNK-a10-b10	WT_Tau	reverse_WT_Tau	intra-protein xl	290	185	105	3117.66	1040.23	3	-3.5	5	7.37
SKASSPSKPPTR-YVIEAGHDTKAK-a8-b10	reverse_WT_Tau	reverse_WT_Tau	intra-protein xl	208	57	151	2710.43	904.484	3	0	1	7.29
DGSKPPEGSSPPTKPAPPTK-K4-155	reverse_WT_Tau	-	monolink	252	n/a	-	2129.1	533.283	4	-1.4	4	7.26
VNKLDPXPVPATQLR-NVKSKIGSTENLK-a3-b3	reverse_WT_Tau	WT_Tau	intra-protein xl	188	257	69	3248.79	813.206	4	3.5	1	7.2
LGADTDGEQDQHMTYGGQDKRDGLGYTGAHDEXVEFEQRPEAX-VNKLDPMPVPATQLR-a20-b3	reverse_WT_Tau	reverse_WT_Tau	intra-protein xl	418	188	230	6632.05	1327.42	5	3.9	1	7.15
IGSLDNITHVPGGGNKK-VNKLDPXPVPATQLR-a16-b3	WT_Tau	reverse_WT_Tau	intra-protein xl	369	188	181	3537.91	885.486	4	4.3	1	7.12
STVKSLDVPKYVIQVSGGGPVHK-K23-156	reverse_WT_Tau	-	monolink	144	n/a	-	2550.41	851.143	3	0.4	1	7.11
TPPAPKTPPSSGEPPKSGDR-KVAVVRTPPK-a16-b1	WT_Tau	WT_Tau	intra-protein xl	190	225	35	3233.78	809.452	4	0	3	7.03
DGSKPPEGSSPPTKPAPPTKAPIR-AKANERFTLK-a4-b2	reverse_WT_Tau	reverse_WT_Tau	intra-protein xl	252	59	193	3726.03	746.213	5	4.8	1	6.93
KLDLSNVQSKCGSK-KIETHK-a1-b1	WT_Tau	WT_Tau	intra-protein xl	281	370	89	2455.3	614.833	4	-3.5	1	6.91
GGGPQHKLNETSGIKSK-TPPKSPSSAKSR-a15-b4	reverse_WT_Tau	WT_Tau	intra-protein xl	183	234	51	3116.66	780.173	4	0.6	1	6.9
VQSKIGSLDNITHVPGGGNKK-K21-156	WT_Tau	-	monolink	370	n/a	-	2304.24	577.068	4	-1.2	1	6.8
GAAPPGQKGQANATR-HQPGGGKVQIINKK-a8-b13	WT_Tau	WT_Tau	intra-protein xl	163	280	117	3063.66	1022.23	3	-1.5	1	6.7
TPPKSPSSAK-AKANER-a4-b2	WT_Tau	reverse_WT_Tau	intra-protein xl	234	59	175	1823.97	608.998	3	-1.6	1	6.69
HHINGLSGCKSTVKSLDVPK-K10-K14	reverse_WT_Tau	-	intralink	121	125	4	2314.2	772.408	3	-4	1	6.66
YVIQVSGGGPVHKINDK-K17-156	reverse_WT_Tau	-	monolink	148	n/a	-	1966.05	656.358	3	-1.4	1	6.62
SKIGSTENLKHQPGGGK-TPPKSPSSAKSR-a2-b4	WT_Tau	WT_Tau	intra-protein xl	259	234	25	3116.66	780.173	4	0.6	2	6.6
LQTAPVPXPDLKNVK-DKFDLKESK-a12-b2	WT_Tau	reverse_WT_Tau	intra-protein xl	254	95	159	2912.57	971.864	3	4.3	4	6.59
SKASSPSKPPTR-YVIEAGHDTKAK-a2-b10	reverse_WT_Tau	reverse_WT_Tau	intra-protein xl	202	57	145	2710.43	904.484	3	0	1	6.55
CGSLGNIHHKPGGGQVEVKSEKLDFK-K22-156	WT_Tau	-	monolink	343	n/a	-	2976.51	993.176	3	-2.5	3	6.54
VTSKCGSLGNIHHKPGGGQVEVK-K14-K23	WT_Tau	-	intralink	331	340	9	2526.3	632.582	4	-1.4	1	6.53
KLDLSNVQSKCGSK-AKGADGKTK-a1-b7	WT_Tau	WT_Tau	intra-protein xl	281	148	133	2575.37	644.85	4	1.9	1	6.51
IPAKTPPAPKTPPSSGEPPK-KPERTPPTPLSPTRSR-a10-b1	WT_Tau	reverse_WT_Tau	intra-protein xl	180	218	38	3953.17	989.3	4	-1.6	1	6.5
DNIKHVPGGGSVQIVYKPVDLSK-K17-K23	WT_Tau	-	intralink	311	317	6	2587.39	863.472	3	-3.7	1	6.48
HTEIKKNGGGPVHTINDLSGIK-LQTAPVPMPDLKNVKSK-a5-b15	reverse_WT_Tau	WT_Tau	intra-protein xl	72	257	185	4317.37	720.569	6	4.2	1	6.4
SGCKSQVNSLDLKK-NVKSKIGSTENLK-a13-b3	reverse_WT_Tau	WT_Tau	intra-protein xl	161	257	96	3117.67	1040.23	3	0.9	2	6.24
ESKVEVQGGGPK-AKANERFTLK-a3-b2	reverse_WT_Tau	reverse_WT_Tau	intra-protein xl	102	59	43	2528.37	633.1	4	3	1	6.24
SRLQTAPVPXPDLKNVK-VNKLDPXPVPATQLR-a14-b3	WT_Tau	reverse_WT_Tau	intra-protein xl	254	188	66	3741.04	1248.02	3	1.7	2	6.17
GADGKTKIATPR-DKFDLKESK-a7-b6	WT_Tau	reverse_WT_Tau	intra-protein xl	150	99	51	2460.33	821.118	3	3.4	1	6.1
ESKVEVQGGGPKHHINGLSGCK-SKIGSTENLK-a12-b2	reverse_WT_Tau	WT_Tau	intra-protein xl	111	259	148	3530.82	883.713	4	1.4	1	6.1
DNIKHVPGGGSVQIVYKPVDLSKVTSK-DGSKPPEGSSPPTKPAPPTK-a4-b14	WT_Tau	reverse_WT_Tau	intra-protein xl	298	262	36	4976.63	1245.17	4	-3.2	1	6.07
YVIQVSGGGPVHKINDK-K13-155	reverse_WT_Tau	-	monolink	144	n/a	-	1965.07	656.03	3	-1.6	1	6.02
TANAQGKQGPPAAGRPTAIKTK-KLDLSNVQSKCGSK-a20-b10	reverse_WT_Tau	WT_Tau	intra-protein xl	292	290	2	3863.05	966.77	4	-4.8	3	5.98
AKTDHGAEIVYKSPVVSGDTSPR-K2-156	WT_Tau	-	monolink	385	n/a	-	2569.3	857.441	3	-0.6	2	5.82
YVIQVSGGGPVHKINDK-SKASSPSKPPTR-a13-b2	reverse_WT_Tau	reverse_WT_Tau	intra-protein xl	144	202	58	3189.71	1064.24	3	-2.3	1	5.76
TPPAPKTPPSSGEPPKSGDR-ASSPSKPPTRVVAVKKPER-a6-b6	WT_Tau	reverse_WT_Tau	intra-protein xl	180	208	28	4173.26	1392.1	3	2.3	2	5.75
SKIGSTENLKHQPGGGK-SKASSPSKPPTR-a2-b8	WT_Tau	reverse_WT_Tau	intra-protein xl	259	208	51	3116.66	780.173	4	0.4	1	5.71
KNGGGPVHTINDLSGIK-K1-155	reverse_WT_Tau	-	monolink	73	n/a	-	1861	621.342	3	-3.1	1	5.61
TPSLPTPPTREPKK-SKDGTGSDDKK-a13-b2	WT_Tau	WT_Tau	intra-protein xl	224	132	92	2822.48	706.628	4	4.4	1	5.6
KNGGGPVHTINDLSGIK-K17-155	reverse_WT_Tau	-	monolink	89	n/a	-	1861.01	621.343	3	-1.6	1	5.58
QEFEVMEDHAGTYGLGDRKDQGGYTMHQDQEGDTDAGLK-VQSKIGSLDNITHVPGGGNKK-a19-b4	WT_Tau	WT_Tau	intra-protein xl	24	353	329	6614.07	1323.82	5	-5	8	5.48
IPAKTPPAPKTPPSSGEPPK-K10-K20	WT_Tau	-	intralink	180	190	10	2134.18	712.4	3	3.7	7	5.47
SPSSAKSRLQTAPVPMPDLK-AKTDHGAEIVYK-a6-b2	WT_Tau	WT_Tau	intra-protein xl	240	385	145	3577.89	1193.64	3	1.6	1	5.47
DGSKPPEGSSPPTKPAPPTK-K4-156	reverse_WT_Tau	-	monolink	252	n/a	-	2130.08	711.035	3	-1.4	1	5.4
VEVQGGGPKHHINGLSGCKSTVK-LQTAPVPXPDLKNVK-a9-b12	reverse_WT_Tau	WT_Tau	intra-protein xl	111	254	143	4192.22	1049.06	4	1.2	1	5.38
TPPAPKTPPSSGEPPKSGDR-SKASSPSKPPTR-a16-b2	WT_Tau	reverse_WT_Tau	intra-protein xl	190	202	12	3381.76	1128.26	3	3.2	1	5.37
TPPKSPSSAKSR-KLDLSNVQSK-a4-b1	WT_Tau	WT_Tau	intra-protein xl	234	281	47	2510.36	837.794	3	-4.9	1	5.34
DQGGYTMHQDQEGDTDAGLKESPLQTPTEDGSEEPGSETSDAK-IATPRGAAPPGQKGQANATR-a20-b13	WT_Tau	WT_Tau	intra-protein xl	44	163	119	6636.06	1107.02	6	3.1	1	5.24
YVIQVSGGGPVHKINDKSGCK-STVKSLDVPK-a17-b4	reverse_WT_Tau	reverse_WT_Tau	intra-protein xl	148	125	23	3452.83	864.216	4	-0.6	1	5.19
DRVQSKIGSLDNITHVPGGGNK-LTFRENAKAK-a6-b8	WT_Tau	WT_Tau	intra-protein xl	353	383	30	3605.92	902.488	4	-1.7	1	5.1
QEFEVXEDHAGTYGLGDRKDQGGYTMHQDQEGDTDAGLK-VQSKIGSLDNITHVPGGGNKK-a19-b20	WT_Tau	WT_Tau	intra-protein xl	24	369	345	6630.07	1327.02	5	-3.2	8	5.1
NVKSKIGSTENLK-SQVNSLDLKK-a5-b9	WT_Tau	reverse_WT_Tau	intra-protein xl	259	161	98	2685.48	896.168	3	-4.5	1	5.06
KNGGGPVHTINDLSGIKSQVR-KNIIQVKGGGPQHK-a17-b1	reverse_WT_Tau	reverse_WT_Tau	intra-protein xl	89	162	73	3817.1	1273.38	3	-1	1	5.06
SLDVPKYVIQVSGGGPVHK-K19-156	reverse_WT_Tau	-	monolink	144	n/a	-	2135.16	712.729	3	0.3	4	5.02
STVKSLDVPKYVIQVSGGGPVHK-K4-K23	reverse_WT_Tau	-	intralink	125	144	19	2532.39	845.138	3	-1.3	2	4.96
GGGPQHKLNETSGIK-STVKSLDVPK-a7-b4	reverse_WT_Tau	reverse_WT_Tau	intra-protein xl	175	125	50	2732.48	684.128	4	2.9	1	4.92
GAAPPGQKGQANATR-SKIGSTENLK-a8-b2	WT_Tau	WT_Tau	intra-protein xl	163	259	96	2636.39	660.105	4	0.4	1	4.9
LGADTDGEQDQHXTYGGQDKRDGLGYTGAHDEMVEFEQRPEAM-VNKLDPMPVPATQLR-a20-b3	reverse_WT_Tau	reverse_WT_Tau	intra-protein xl	418	188	230	6616.06	1103.68	6	3.7	1	4.88
CGSKDNIKHVPGGGSVQIVYKPVDLSK-K4-K21	WT_Tau	-	intralink	294	311	17	3019.59	1007.54	3	4	3	4.88
DGSKPPEGSSPPTKPAPPTKAPIR-TKIATPRGAAPPGQK-a20-b2	reverse_WT_Tau	WT_Tau	intra-protein xl	268	150	118	4041.2	1348.08	3	0.5	1	4.88
SKIGSTENLKHQPGGGK-SKIGSTENLK-a2-b2	WT_Tau	WT_Tau	intra-protein xl	259	259	0	2950.57	738.65	4	-0.6	3	4.84
GAAPPGQKGQANATRIPAK-SRLQTAPVPMPDLKNVK-a8-b14	WT_Tau	WT_Tau	intra-protein xl	163	254	91	3863.1	966.784	4	-4.1	1	4.78
AKTDHGAEIVYK-FTLKHTEIK-a2-b4	WT_Tau	reverse_WT_Tau	intra-protein xl	385	67	318	2584.4	647.108	4	4	1	4.72
KNGGGPVHTINDLSGIKSQVR-K1-K17	reverse_WT_Tau	-	intralink	73	89	16	2314.24	772.421	3	0.3	1	4.7
KLDLSNVQSKCGSK-KLDLSNVQSK-a10-b1	WT_Tau	WT_Tau	intra-protein xl	290	281	9	2831.5	944.842	3	-1.3	1	4.64
CGSLGNIHHKPGGGQVEVK-KPERTPPTPLSPTRSR-a10-b1	WT_Tau	reverse_WT_Tau	intra-protein xl	331	218	113	3930.06	983.524	4	-0.5	2	4.63
SGCKSQVNSLDLKK-NVKSKIGSTENLK-a4-b3	reverse_WT_Tau	WT_Tau	intra-protein xl	152	257	105	3117.66	1040.23	3	-3.2	1	4.62
HHINGLSGCKSTVK-SKDGTGSDDKK-a10-b2	reverse_WT_Tau	WT_Tau	intra-protein xl	121	132	11	2811.37	938.132	3	-3.7	1	4.62
VQSKIGSLDNITHVPGGGNKK-TPSLPTPPTREPKK-a20-b13	WT_Tau	WT_Tau	intra-protein xl	369	224	145	3834.11	1279.04	3	2	3	4.62
DNIKHVPGGGSVQIVYKPVDLSK-K17-156	WT_Tau	-	monolink	311	n/a	-	2605.41	869.478	3	-0.2	1	4.6
SKASSPSKPPTRVVAVK-XVSKSKDGTGSDDK-a8-b6	reverse_WT_Tau	WT_Tau	intra-protein xl	208	132	76	3345.73	837.44	4	-4.9	1	4.53
SRLQTAPVPXPDLKNVK-SQVNSLDLKK-a14-b9	WT_Tau	reverse_WT_Tau	intra-protein xl	254	161	93	3177.75	1060.26	3	2.6	1	4.53
KNIIQVKGGGPQHK-SKDGTGSDDKK-a1-b2	reverse_WT_Tau	WT_Tau	intra-protein xl	162	132	30	2777.46	926.829	3	-1.5	1	4.49
IGSTENLKHQPGGGK-QGPPAAGRPTAIKTK-a8-b13	WT_Tau	reverse_WT_Tau	intra-protein xl	267	292	25	3151.71	1051.58	3	0.2	1	4.48
VEVQGGGPKHHINGLSGCKSTVK-KNGGGPVHTINDLSGIKSQVR-a9-b17	reverse_WT_Tau	reverse_WT_Tau	intra-protein xl	111	89	22	4702.47	1176.63	4	-0.1	1	4.47
DQGGYTXHQDQEGDTDAGLKESPLQTPTEDGSEEPGSETSDAK-SKVNKLDPXPVPATQLR-a20-b5	WT_Tau	reverse_WT_Tau	intra-protein xl	44	188	144	6600.05	1321.02	5	4.6	3	4.32
KNGGGPVHTINDLSGIKSQVR-VNKLDPMPVPATQLRSK-a1-b3	reverse_WT_Tau	reverse_WT_Tau	intra-protein xl	73	188	115	4207.31	1403.44	3	5	1	4.22
DGSKPPEGSSPPTKPAPPTK-KPERTPPTPLSPTRSR-a14-b1	reverse_WT_Tau	reverse_WT_Tau	intra-protein xl	262	218	44	3931.06	983.773	4	-4.8	1	4.21
APIRTANAQGKQGPPAAGRPTAIK-K11-K24	reverse_WT_Tau	-	intralink	279	292	13	2508.38	502.685	5	-3.4	1	4.13
TPPAPKTPPSSGEPPKSGDR-ASSPSKPPTRVVAVKKPER-a6-b15	WT_Tau	reverse_WT_Tau	intra-protein xl	180	217	37	4173.26	1392.1	3	2.3	1	4.06
KPERTPPTPLSPTRSR-KDDSGTGDKSK-a1-b1	reverse_WT_Tau	reverse_WT_Tau	intra-protein xl	218	302	84	3093.61	1032.21	3	2.7	1	4.05
KNGGGPVHTINDLSGIKSQVR-VNKLDPMPVPATQLRSK-a17-b3	reverse_WT_Tau	reverse_WT_Tau	intra-protein xl	89	188	99	4207.31	1403.44	3	4.7	3	4.04
LQTAPVPXPDLKNVKSK-SKASSPSKPPTR-a15-b2	WT_Tau	reverse_WT_Tau	intra-protein xl	257	202	55	3260.78	1087.93	3	-0.6	1	4.02
DNIKHVPGGGSVQIVYKPVDLSKVTSK-DGSKPPEGSSPPTKPAPPTK-a23-b14	WT_Tau	reverse_WT_Tau	intra-protein xl	317	262	55	4976.63	830.446	6	-3.9	1	4.01
LQTAPVPXPDLKNVK-NVKSKIGSTENLK-a12-b3	WT_Tau	WT_Tau	intra-protein xl	254	257	3	3220.77	1074.6	3	-2.3	1	4
DQGGYTXHQDQEGDTDAGLKESPLQTPTEDGSEEPGSETSDAK-SKVNKLDPXPVPATQLR-a20-b2	WT_Tau	reverse_WT_Tau	intra-protein xl	44	185	141	6600.05	1321.02	5	4.9	1	3.94
LQTAPVPMPDLKNVK-AKKDDSGTGDK-a12-b2	WT_Tau	reverse_WT_Tau	intra-protein xl	254	301	47	2908.53	970.519	3	3.8	1	3.82
SPSSAKSRLQTAPVPMPDLK-GADGKTKIATPR-a6-b7	WT_Tau	WT_Tau	intra-protein xl	240	150	90	3460.89	866.229	4	4.1	1	3.81
IATPRGAAPPGQKGQANATR-LQTAPVPMPDLKNVKSK-a13-b12	WT_Tau	WT_Tau	intra-protein xl	163	254	91	3964.18	992.052	4	2.4	1	3.81
CGSLGNIHHKPGGGQVEVK-LQTAPVPXPDLKNVKSK-a10-b15	WT_Tau	WT_Tau	intra-protein xl	331	257	74	3992.09	1331.7	3	-2.3	1	3.77
QEFEVXEDHAGTYGLGDRKDQGGYTMHQDQEGDTDAGLK-VQSKIGSLDNITHVPGGGNKK-a19-b4	WT_Tau	WT_Tau	intra-protein xl	24	353	329	6630.07	1327.02	5	-3.2	2	3.75
KNGGGPVHTINDLSGIKSQVR-SRLQTAPVPMPDLKNVK-a17-b14	reverse_WT_Tau	WT_Tau	intra-protein xl	89	254	165	4207.31	1403.44	3	4.7	2	3.73
LQTAPVPMPDLKNVK-SKASSPSKPPTR-a12-b8	WT_Tau	reverse_WT_Tau	intra-protein xl	254	208	46	3029.65	1010.89	3	-1.4	1	3.7
INDKSGCKSQVNSLDLK-KPERTPPTPLSPTRSR-a8-b1	reverse_WT_Tau	reverse_WT_Tau	intra-protein xl	152	218	66	3862.04	1288.36	3	1.6	1	3.69
DQGGYTMHQDQEGDTDAGLKESPLQTPTEDGSEEPGSETSDAK-SLDVPKYVIQVSGGGPVHK-a20-b6	WT_Tau	reverse_WT_Tau	intra-protein xl	44	131	87	6654.05	1110.02	6	-1.5	1	3.68
TPPAPKTPPSSGEPPKSGDR-STVKSLDVPK-a6-b4	WT_Tau	reverse_WT_Tau	intra-protein xl	180	125	55	3212.69	1071.91	3	0.4	1	3.62
DGSKPPEGSSPPTKPAPPTKAPIR-TKIATPRGAAPPGQK-a14-b2	reverse_WT_Tau	WT_Tau	intra-protein xl	262	150	112	4041.2	1348.08	3	0.5	1	3.61
SPSSAKSRLQTAPVPXPDLK-VNKLDPXPVPATQLRSK-a6-b3	WT_Tau	reverse_WT_Tau	intra-protein xl	240	188	52	4172.25	835.458	5	4.3	1	3.54
HQPGGGKVQIINKK-TPPKSPSSAKSR-a13-b10	WT_Tau	WT_Tau	intra-protein xl	280	240	40	2882.62	961.88	3	3.1	1	3.49
DGSKPPEGSSPPTKPAPPTKAPIR-QGPPAAGRPTAIKTK-a20-b13	reverse_WT_Tau	reverse_WT_Tau	intra-protein xl	268	292	24	4041.2	1348.08	3	0.5	1	3.39
FDLKESKVEVQGGGPK-K4-K7	reverse_WT_Tau	-	intralink	99	102	3	1854.97	619.331	3	-1.3	1	3.34
ADSTESGPEESGDETPTQLPSEKLGADTDGEQDQHXTYGGQDKR-SKASSPSKPPTRVVAVK-a43-b2	reverse_WT_Tau	reverse_WT_Tau	intra-protein xl	418	202	216	6585.07	1318.02	5	-2.1	5	3.34
DGSKPPEGSSPPTKPAPPTK-TPPAPKTPPSSGEPPKSGDR-a4-b6	reverse_WT_Tau	WT_Tau	intra-protein xl	252	180	72	4114.1	1029.53	4	3.2	1	3.31
HQPGGGKVQIINKK-SGCKSQVNSLDLK-a13-b4	WT_Tau	reverse_WT_Tau	intra-protein xl	280	152	128	3075.66	1026.23	3	4.2	1	3.31
CGSLGNIHHKPGGGQVEVK-FTLKHTEIKK-a10-b4	WT_Tau	reverse_WT_Tau	intra-protein xl	331	67	264	3354.78	1119.27	3	-1.6	1	3.28
YVIEAGHDTKAK-AKANERFTLK-a10-b2	reverse_WT_Tau	reverse_WT_Tau	intra-protein xl	57	59	2	2645.42	882.815	3	1	1	3.25
GAAPPGQKGQANATRIPAK-YVIQVSGGGPVHKINDK-a8-b13	WT_Tau	reverse_WT_Tau	intra-protein xl	163	144	19	3780.04	1261.02	3	-1.1	1	3.21
NGGGPVHTINDLSGIKSQVRDK-SGCKSQVNSLDLKK-a16-b13	reverse_WT_Tau	reverse_WT_Tau	intra-protein xl	89	161	72	3992.09	1331.7	3	3.4	1	3.2
LDLSNVQSKCGSKDNIK-NVKSKIGSTENLK-a13-b3	WT_Tau	WT_Tau	intra-protein xl	294	257	37	3459.81	865.961	4	-3.9	1	3.19
VQSKIGSLDNITHVPGGGNKK-TPSLPTPPTREPKK-a4-b13	WT_Tau	WT_Tau	intra-protein xl	353	224	129	3834.11	1279.04	3	2	1	3.17
DGSKPPEGSSPPTKPAPPTKAPIR-TKIATPRGAAPPGQK-a4-b2	reverse_WT_Tau	WT_Tau	intra-protein xl	252	150	102	4041.2	1011.31	4	-1	2	3.01
INDKSGCKSQVNSLDLK-INDKSGCKSQVNSLDLK-a8-b8	reverse_WT_Tau	reverse_WT_Tau	intra-protein xl	152	152	0	3947.98	1317	3	-3.4	1	2.98
SLDVPKYVIQVSGGGPVHK-KLDLSNVQSKCGSK-a6-b1	reverse_WT_Tau	WT_Tau	intra-protein xl	131	281	150	3679.98	1227.67	3	4.2	2	2.95
IPAKTPPAPKTPPSSGEPPK-SRLQTAPVPXPDLKNVK-a10-b14	WT_Tau	WT_Tau	intra-protein xl	180	254	74	4043.2	1348.74	3	-1.9	4	2.91
CGSKDNIKHVPGGGSVQIVYKPVDLSK-K4-K27	WT_Tau	-	intralink	294	317	23	3019.59	1007.54	3	1.7	3	2.81
SPSSAKSRLQTAPVPMPDLK-K6-K20	WT_Tau	-	intralink	240	254	14	2247.18	750.069	3	-4.3	4	2.74
LQTAPVPMPDLKNVKSK-INDKSGCK-a15-b4	WT_Tau	reverse_WT_Tau	intra-protein xl	257	148	109	2923.54	975.521	3	-4.3	1	2.73
LQTAPVPXPDLKNVK-LNETSGIKSKVNK-a12-b10	WT_Tau	reverse_WT_Tau	intra-protein xl	254	185	69	3220.78	1074.6	3	2.3	1	2.72
NGGGPVHTINDLSGIKSQVRDK-KLDLSNVQSKCGSK-a16-b10	reverse_WT_Tau	WT_Tau	intra-protein xl	89	290	201	3992.09	1331.7	3	3.2	1	2.68
CGSKDNIKHVPGGGSVQIVYKPVDLSK-K27-156	WT_Tau	-	monolink	317	n/a	-	3037.59	1013.54	3	-0.7	2	2.66
GGGPQHKLNETSGIKSK-VNKLDPXPVPATQLR-a15-b3	reverse_WT_Tau	reverse_WT_Tau	intra-protein xl	183	188	5	3568.92	1190.65	3	4	2	2.65
KNGGGPVHTINDLSGIKSQVR-SKVNKLDPMPVPATQLR-a17-b5	reverse_WT_Tau	reverse_WT_Tau	intra-protein xl	89	188	99	4207.31	1403.44	3	5	1	2.62
KLDLSNVQSKCGSK-KLDLSNVQSK-a1-b1	WT_Tau	WT_Tau	intra-protein xl	281	281	0	2831.49	944.84	3	-3.9	1	2.59
NGGGPVHTINDLSGIKSQVR-VNKLDPMPVPATQLR-a16-b3	reverse_WT_Tau	reverse_WT_Tau	intra-protein xl	89	188	99	3864.08	967.028	4	3	2	2.51
DGSKPPEGSSPPTKPAPPTKAPIR-QGPPAAGRPTAIKTK-a4-b13	reverse_WT_Tau	reverse_WT_Tau	intra-protein xl	252	292	40	4041.19	1348.07	3	-1.7	6	2.43
ADSTESGPEESGDETPTQLPSEKLGADTDGEQDQHXTYGGQDKR-YVIQVSGGGPVHKINDK-a43-b13	reverse_WT_Tau	reverse_WT_Tau	intra-protein xl	418	144	274	6657.05	1110.52	6	0.4	1	2.38
AKTDHGAEIVYKSPVVSGDTSPR-K12-156	WT_Tau	-	monolink	395	n/a	-	2569.3	857.441	3	-0.6	1	2.38
KNGGGPVHTINDLSGIK-NIIQVKGGGPQHK-a1-b6	reverse_WT_Tau	reverse_WT_Tau	intra-protein xl	73	168	95	3218.77	1073.93	3	4.7	1	2.29
MVSKSKDGTGSDDK-KIETHKLTFR-a4-b1	WT_Tau	WT_Tau	intra-protein xl	130	370	240	2863.48	955.502	3	2.8	2	2.26
LQTAPVPMPDLKNVKSK-TPPSSGEPPKSGDR-a15-b10	WT_Tau	WT_Tau	intra-protein xl	257	190	67	3413.78	854.452	4	-2.8	1	2.22
QGPPAAGRPTAIKTKGDAGK-TPPSSGEPPKSGDR-a13-b10	reverse_WT_Tau	WT_Tau	intra-protein xl	292	190	102	3468.8	694.768	5	1.3	1	2.2
FDLKESKVEVQGGGPK-ESKVEVQGGGPK-a4-b3	reverse_WT_Tau	reverse_WT_Tau	intra-protein xl	99	102	3	3068.59	1023.87	3	-2.6	2	2.19
TPPSSGEPPKSGDR-SKASSPSKPPTR-a10-b2	WT_Tau	reverse_WT_Tau	intra-protein xl	190	202	12	2790.42	931.147	3	0.7	1	2.15
GAAPPGQKGQANATRIPAK-SKVNKLDPMPVPATQLR-a8-b2	WT_Tau	reverse_WT_Tau	intra-protein xl	163	185	22	3863.12	1288.71	3	-0.8	1	2.12
VQSKIGSLDNITHVPGGGNK-YVIQVSGGGPVHKINDK-a4-b13	WT_Tau	reverse_WT_Tau	intra-protein xl	353	144	209	3968.1	993.034	4	-2	1	2.08
QGPPAAGRPTAIKTKGDAGK-KPERTPPTPLSPTR-a15-b1	reverse_WT_Tau	reverse_WT_Tau	intra-protein xl	294	218	76	3634	1212.34	3	0.8	1	2.02
GGGPQHKLNETSGIKSK-KPERTPPTPLSPTR-a15-b1	reverse_WT_Tau	reverse_WT_Tau	intra-protein xl	183	218	35	3450.85	1151.29	3	-3.6	1	2.01
LQTAPVPMPDLKNVKSK-SKASSPSKPPTR-a15-b2	WT_Tau	reverse_WT_Tau	intra-protein xl	257	202	55	3244.8	1082.61	3	4.9	1	1.96
YVIQVSGGGPVHKINDK-K13-K17	reverse_WT_Tau	-	intralink	144	148	4	1948.04	650.355	3	0	1	1.87
TPPAPKTPPSSGEPPK-ESKVEVQGGGPK-a6-b3	WT_Tau	reverse_WT_Tau	intra-protein xl	180	102	78	2938.54	980.522	3	4.9	1	1.71
DGSKPPEGSSPPTKPAPPTK-SKASSPSKPPTRVVAVK-a14-b8	reverse_WT_Tau	reverse_WT_Tau	intra-protein xl	262	208	54	3850.09	1284.37	3	0.6	1	1.68
YVIEAGHDTKAKANER-KLDLSNVQSK-a12-b1	reverse_WT_Tau	WT_Tau	intra-protein xl	59	281	222	3069.61	1024.21	3	0.7	1	1.65
IGSLDNITHVPGGGNKK-NVKSKIGSTENLK-a16-b3	WT_Tau	WT_Tau	intra-protein xl	369	257	112	3260.78	1087.93	3	1.7	1	1.24
VQSKIGSLDNITHVPGGGNKK-QGPPAAGRPTAIKTKGDAGK-a4-b15	WT_Tau	reverse_WT_Tau	intra-protein xl	353	294	59	4206.31	1403.11	3	4.2	3	1.22
ADSTESGPEESGDETPTQLPSEKLGADTDGEQDQHXTYGGQDKR-SKASSPSKPPTRVVAVK-a43-b8	reverse_WT_Tau	reverse_WT_Tau	intra-protein xl	418	208	210	6585.07	1318.02	5	-1.7	1	1.03
AKTDHGAEIVYKSPVVSGDTSPR-K2-155	WT_Tau	-	monolink	385	n/a	-	2568.31	857.111	3	-4.6	1	0.99
HHINGLSGCKSTVK-HQPGGGKVQIINKK-a10-b13	reverse_WT_Tau	WT_Tau	intra-protein xl	121	280	159	3177.73	1060.25	3	4.6	1	0.89
CGSLGNIHHKPGGGQVEVK-SRLQTAPVPMPDLKNVK-a10-b14	WT_Tau	WT_Tau	intra-protein xl	331	254	77	4004.1	1335.71	3	-3.1	1	0.82
DRVQSKIGSLDNITHVPGGGNK-LNETSGIKSKVNK-a6-b10	WT_Tau	reverse_WT_Tau	intra-protein xl	353	185	168	3846.07	962.525	4	2	1	0.8
CGSLGNIHHKPGGGQVEVKSEK-K10-155	WT_Tau	-	monolink	331	n/a	-	2472.26	825.094	3	0.9	1	0.69
NGGGPVHTINDLSGIKSQVRDK-NVKSKIGSTENLK-a16-b3	reverse_WT_Tau	WT_Tau	intra-protein xl	89	257	168	3846.08	1283.03	3	5	1	0.65
VEVQGGGPKHHINGLSGCK-SKASSPSKPPTRVVAVK-a9-b2	reverse_WT_Tau	reverse_WT_Tau	intra-protein xl	111	202	91	3849.07	1284.03	3	0.4	2	0.52
QEFEVMEDHAGTYGLGDRKDQGGYTMHQDQEGDTDAGLK-VQSKIGSLDNITHVPGGGNKK-a19-b20	WT_Tau	WT_Tau	intra-protein xl	24	369	345	6614.07	1323.82	5	-5	1	0.51
VQSKIGSLDNITHVPGGGNK-VQSKIGSLDNITHVPGGGNK-a4-b4	WT_Tau	WT_Tau	intra-protein xl	353	353	0	4178.2	1045.56	4	-2.1	1	0.4
LDPMPVPATQLRSKASSPSKPPTR-DRVQSKIGSLDNITHVPGGGNK-a14-b6	reverse_WT_Tau	WT_Tau	intra-protein xl	202	353	151	4989.62	1248.41	4	-4.3	1	0.14

## Sheet: Fig4f_WT5
Id	Protein1	Protein2	XLType	AbsPos1	AbsPos2	deltaAA	Mr	Mz	z	Error_rel[ppm]	nseen	ld-Score
VQIINKKLDLSNVQSK-K6-K7	WT_Tau	-	intralink	280	281	1	1964.13	655.718	3	0	19	53.15
DNIKHVPGGGSVQIVYKPVDLSK-K4-155	WT_Tau	-	monolink	298	n/a	-	2604.43	869.15	3	-0.6	9	51.17
HQPGGGKVQIINK-K7-156	WT_Tau	-	monolink	274	n/a	-	1530.85	511.292	3	-0.1	16	50.91
HVPGGGSVQIVYKPVDLSKVTSK-K19-155	WT_Tau	-	monolink	317	n/a	-	2549.42	638.363	4	-0.6	9	48.38
CGSLGNIHHKPGGGQVEVK-K10-156	WT_Tau	-	monolink	331	n/a	-	2129.07	533.275	4	-0.4	24	47.72
HQPGGGKVQIINK-K7-155	WT_Tau	-	monolink	274	n/a	-	1529.87	510.963	3	-2	6	47.72
LDLSNVQSKCGSK-K9-155	WT_Tau	-	monolink	290	n/a	-	1589.81	530.943	3	-2.5	1	46.91
CGSLGNIHHKPGGGQVEVKSEK-K19-155	WT_Tau	-	monolink	340	n/a	-	2472.25	825.091	3	-2	7	46.37
KLDLSNVQSKCGSK-K10-156	WT_Tau	-	monolink	290	n/a	-	1718.89	573.97	3	-0.4	4	45.84
HVPGGGSVQIVYKPVDLSKVTSK-K19-K23	WT_Tau	-	intralink	317	321	4	2532.39	634.106	4	-0.3	4	45.47
CGSLGNIHHKPGGGQVEVK-K10-155	WT_Tau	-	monolink	331	n/a	-	2128.08	710.369	3	-1.4	14	45.25
HVPGGGSVQIVYKPVDLSK-K13-156	WT_Tau	-	monolink	311	n/a	-	2135.16	712.729	3	0.4	349	44.79
CGSLGNIHHKPGGGQVEVKSEK-LDFKDR-a19-b4	WT_Tau	WT_Tau	intra-protein xl	340	347	7	3247.64	650.535	5	-0.9	1	43.88
HVPGGGSVQIVYKPVDLSKVTSK-K13-K19	WT_Tau	-	intralink	311	317	6	2532.39	634.106	4	-0.6	148	43.54
HVPGGGSVQIVYKPVDLSK-K13-155	WT_Tau	-	monolink	311	n/a	-	2134.18	712.4	3	-2.2	487	43.5
HVPGGGSVQIVYKPVDLSKVTSK-K19-156	WT_Tau	-	monolink	317	n/a	-	2550.4	638.609	4	-0.7	67	43.4
DNIKHVPGGGSVQIVYKPVDLSK-K4-156	WT_Tau	-	monolink	298	n/a	-	2605.41	869.479	3	0.3	38	42.63
IGSLDNITHVPGGGNKK-K16-156	WT_Tau	-	monolink	369	n/a	-	1861.99	621.671	3	-0.2	186	42.4
IGSTENLKHQPGGGK-KLDLSNVQSK-a8-b1	WT_Tau	WT_Tau	intra-protein xl	267	281	14	2790.49	931.17	3	-0.4	7	41.89
IETHKLTFR-K5-156	WT_Tau	-	monolink	375	n/a	-	1299.72	434.247	3	-1	1	41.76
HQPGGGKVQIINK-KLDLSNVQSK-a7-b1	WT_Tau	WT_Tau	intra-protein xl	274	281	7	2643.47	529.701	5	-1	2	41.75
IGSTENLKHQPGGGK-K8-155	WT_Tau	-	monolink	267	n/a	-	1676.88	559.969	3	-2.2	9	41.11
KLDLSNVQSK-LDFKDR-a1-b4	WT_Tau	WT_Tau	intra-protein xl	281	347	66	2061.11	516.285	4	-1.2	1	41.09
SKIGSTENLK-VQIINKK-a2-b6	WT_Tau	WT_Tau	intra-protein xl	259	280	21	2055.19	686.072	3	-1.3	2	40.98
VQSKIGSLDNITHVPGGGNK-SEKLDFKDR-a4-b3	WT_Tau	WT_Tau	intra-protein xl	353	343	10	3294.72	824.687	4	-1.5	6	40.79
IGSLDNITHVPGGGNKK-K16-155	WT_Tau	-	monolink	369	n/a	-	1861.01	621.343	3	-1.2	348	39.97
KLDLSNVQSKCGSK-K10-155	WT_Tau	-	monolink	290	n/a	-	1717.9	573.641	3	-2.3	1	39.9
DRVQSKIGSLDNITHVPGGGNK-K6-156	WT_Tau	-	monolink	353	n/a	-	2447.27	612.826	4	-1.1	1	39.65
VTSKCGSLGNIHHKPGGGQVEVK-K4-156	WT_Tau	-	monolink	321	n/a	-	2544.31	849.111	3	-1	56	39.6
LDLSNVQSKCGSKDNIK-K13-156	WT_Tau	-	monolink	294	n/a	-	2061.04	688.021	3	-1.4	2	39.31
VQIINKK-LDFKDR-a6-b4	WT_Tau	WT_Tau	intra-protein xl	280	347	67	1772.02	444.012	4	-1.9	2	39.3
VQSKIGSLDNITHVPGGGNKK-K4-155	WT_Tau	-	monolink	353	n/a	-	2303.26	576.822	4	-1.5	4	38.98
VQSKIGSLDNITHVPGGGNK-LDFKDR-a4-b4	WT_Tau	WT_Tau	intra-protein xl	353	347	6	2950.55	591.117	5	-1.1	6	38.94
CGSLGNIHHKPGGGQVEVK-SKIGSTENLK-a10-b2	WT_Tau	WT_Tau	intra-protein xl	331	259	72	3186.64	797.668	4	-1.3	1	38.93
VQSKIGSLDNITHVPGGGNK-SKIGSTENLK-a4-b2	WT_Tau	WT_Tau	intra-protein xl	353	259	94	3233.72	809.439	4	-0.2	1	38.88
KLDLSNVQSK-SKIGSTENLK-a1-b2	WT_Tau	WT_Tau	intra-protein xl	281	259	22	2344.28	587.079	4	-0.9	3	38.81
IGSLDNITHVPGGGNKKIETHK-K16-K17	WT_Tau	-	intralink	369	370	1	2452.3	614.084	4	-1.5	15	38.76
IGSLDNITHVPGGGNKK-K17-156	WT_Tau	-	monolink	370	n/a	-	1861.99	621.671	3	-0.2	58	38.71
KIETHKLTFR-K6-155	WT_Tau	-	monolink	375	n/a	-	1426.83	476.617	3	-3	1	38.61
LDLSNVQSKCGSK-SKIGSTENLK-a9-b2	WT_Tau	WT_Tau	intra-protein xl	290	259	31	2648.36	663.099	4	-1.4	2	38.52
KLDLSNVQSKCGSK-K10-K14	WT_Tau	-	intralink	290	294	4	1700.88	567.966	3	-1	4	38.52
CGSLGNIHHKPGGGQVEVK-SEKLDFK-a10-b3	WT_Tau	WT_Tau	intra-protein xl	331	343	12	2976.51	745.136	4	-0.6	6	38.24
LDLSNVQSKCGSK-VQIINKK-a9-b6	WT_Tau	WT_Tau	intra-protein xl	290	280	10	2414.32	604.588	4	-0.4	2	38.04
DNIKHVPGGGSVQIVYKPVDLSK-VQIINKK-a4-b6	WT_Tau	WT_Tau	intra-protein xl	298	280	18	3428.94	572.497	6	-0.6	3	38.02
IGSLDNITHVPGGGNKK-K17-155	WT_Tau	-	monolink	370	n/a	-	1861	621.343	3	-1.7	96	37.86
VQSKIGSLDNITHVPGGGNK-SEKLDFK-a4-b3	WT_Tau	WT_Tau	intra-protein xl	353	343	10	3023.59	1008.87	3	-0.8	13	37.84
LDLSNVQSKCGSKDNIK-K9-155	WT_Tau	-	monolink	290	n/a	-	2060.06	687.693	3	-1.4	1	37.43
IGSTENLKHQPGGGK-VQIINKK-a8-b6	WT_Tau	WT_Tau	intra-protein xl	267	280	13	2501.39	501.287	5	-0.9	2	37.14
CGSLGNIHHKPGGGQVEVKSEKLDFK-K19-155	WT_Tau	-	monolink	340	n/a	-	2975.53	992.85	3	-1.6	3	37.14
IETHKLTFR-K5-155	WT_Tau	-	monolink	375	n/a	-	1298.73	433.918	3	-3.5	1	36.7
KLDLSNVQSKCGSK-HQPGGGKVQIINK-a10-b7	WT_Tau	WT_Tau	intra-protein xl	290	274	16	3075.65	616.137	5	-1.2	1	36.63
CGSKDNIK-VQIINKK-a4-b6	WT_Tau	WT_Tau	intra-protein xl	294	280	14	1900.04	476.019	4	-1.1	1	36.57
VTSKCGSLGNIHHKPGGGQVEVK-SKIGSTENLK-a4-b2	WT_Tau	WT_Tau	intra-protein xl	321	259	62	3601.89	901.479	4	-1	2	36.5
CGSLGNIHHKPGGGQVEVKSEK-K19-K22	WT_Tau	-	intralink	340	343	3	2455.23	819.417	3	-0.3	4	36.37
VQSKIGSLDNITHVPGGGNK-K4-155	WT_Tau	-	monolink	353	n/a	-	2175.16	726.063	3	-0.9	33	36.31
SEKLDFKDR-K3-155	WT_Tau	-	monolink	343	n/a	-	1291.67	431.566	3	-2.8	4	36.19
VQSKIGSLDNITHVPGGGNK-K4-156	WT_Tau	-	monolink	353	n/a	-	2176.15	726.391	3	0.8	28	36.17
HQPGGGKVQIINK-SKIGSTENLK-a7-b2	WT_Tau	WT_Tau	intra-protein xl	274	259	15	2588.43	518.693	5	-1.1	3	36.13
IGSLDNITHVPGGGNKK-SEKLDFK-a16-b3	WT_Tau	WT_Tau	intra-protein xl	369	343	26	2709.43	542.894	5	-1.2	4	36.1
VTSKCGSLGNIHHKPGGGQVEVK-SEKLDFK-a4-b3	WT_Tau	WT_Tau	intra-protein xl	321	343	22	3391.75	679.359	5	-0.5	4	36.08
CGSKDNIK-SEKLDFK-a4-b3	WT_Tau	WT_Tau	intra-protein xl	294	343	49	1923.96	642.327	3	-1.7	1	35.99
LDLSNVQSKCGSKDNIK-K9-156	WT_Tau	-	monolink	290	n/a	-	2061.04	688.02	3	-1.9	2	35.94
IGSTENLKHQPGGGK-K8-156	WT_Tau	-	monolink	267	n/a	-	1677.87	560.297	3	-1.5	7	35.88
LDLSNVQSKCGSKDNIK-K9-K13	WT_Tau	-	intralink	290	294	4	2043.03	682.017	3	-1.3	2	35.86
SEKLDFKDR-K3-156	WT_Tau	-	monolink	343	n/a	-	1292.66	431.894	3	-1.3	4	35.76
HVPGGGSVQIVYKPVDLSKVTSK-K13-156	WT_Tau	-	monolink	311	n/a	-	2550.4	511.088	5	-1.1	15	35.67
HVPGGGSVQIVYKPVDLSKVTSK-K13-K23	WT_Tau	-	intralink	311	321	10	2532.39	634.106	4	-0.3	8	35.66
DNIKHVPGGGSVQIVYKPVDLSK-IGSTENLKHQPGGGK-a4-b8	WT_Tau	WT_Tau	intra-protein xl	298	267	31	4109.19	1028.31	4	-0.7	1	35.63
HQPGGGKVQIINKK-K7-156	WT_Tau	-	monolink	274	n/a	-	1658.94	553.989	3	-1.3	3	35.52
CGSLGNIHHKPGGGQVEVKSEK-K19-156	WT_Tau	-	monolink	340	n/a	-	2473.24	825.421	3	0.7	10	35.4
HVPGGGSVQIVYKPVDLSK-VQIINKK-a13-b6	WT_Tau	WT_Tau	intra-protein xl	311	280	31	2958.69	740.68	4	-1.1	2	35.3
SEKLDFK-KIETHK-a3-b1	WT_Tau	WT_Tau	intra-protein xl	343	370	27	1757.95	586.992	3	-1.4	6	35.12
IGSLDNITHVPGGGNKK-SEKLDFKDR-a16-b7	WT_Tau	WT_Tau	intra-protein xl	369	347	22	2980.56	746.148	4	-0.9	1	35.09
VTSKCGSLGNIHHKPGGGQVEVK-K4-K14	WT_Tau	-	intralink	321	331	10	2526.3	632.583	4	-1	43	35.09
VQSKIGSLDNITHVPGGGNKK-K4-156	WT_Tau	-	monolink	353	n/a	-	2304.24	577.068	4	-0.6	18	34.96
CGSLGNIHHKPGGGQVEVKSEKLDFK-K22-156	WT_Tau	-	monolink	343	n/a	-	2976.51	745.136	4	-0.6	2	34.95
SEKLDFK-VQIINKK-a3-b6	WT_Tau	WT_Tau	intra-protein xl	343	280	63	1845.06	462.273	4	-1.1	2	34.87
IGSTENLKHQPGGGK-CGSKDNIK-a8-b4	WT_Tau	WT_Tau	intra-protein xl	267	294	27	2580.29	646.081	4	-1.1	3	34.86
CGSLGNIHHKPGGGQVEVK-SEKLDFKDR-a10-b3	WT_Tau	WT_Tau	intra-protein xl	331	343	12	3247.63	812.916	4	-2.3	4	34.79
HQPGGGKVQIINKK-K7-155	WT_Tau	-	monolink	274	n/a	-	1657.96	553.662	3	-1.4	2	34.77
HVPGGGSVQIVYKPVDLSK-K13-K19	WT_Tau	-	intralink	311	317	6	2117.15	706.724	3	-1.2	2	34.73
VQSKIGSLDNITHVPGGGNK-KLDLSNVQSK-a4-b1	WT_Tau	WT_Tau	intra-protein xl	353	281	72	3288.76	823.199	4	-0.7	2	34.22
SKIGSTENLK-LDFKDR-a2-b4	WT_Tau	WT_Tau	intra-protein xl	259	347	88	2006.07	669.697	3	0.1	1	34.07
VTSKCGSLGNIHHKPGGGQVEVK-KLDLSNVQSK-a4-b1	WT_Tau	WT_Tau	intra-protein xl	321	281	40	3656.93	732.393	5	-0.9	3	34.06
IGSLDNITHVPGGGNKK-IGSTENLKHQPGGGK-a16-b8	WT_Tau	WT_Tau	intra-protein xl	369	267	102	3365.77	842.449	4	-0.8	1	34.02
VTSKCGSLGNIHHKPGGGQVEVK-K4-155	WT_Tau	-	monolink	321	n/a	-	2543.33	636.839	4	-1.1	12	33.75
VTSKCGSLGNIHHKPGGGQVEVK-LDFKDR-a4-b4	WT_Tau	WT_Tau	intra-protein xl	321	347	26	3318.71	664.75	5	-0.5	1	33.16
VTSKCGSLGNIHHKPGGGQVEVK-SEKLDFKDR-a4-b3	WT_Tau	WT_Tau	intra-protein xl	321	343	22	3662.88	916.727	4	-1.8	1	32.93
IGSLDNITHVPGGGNKK-VQIINKK-a16-b6	WT_Tau	WT_Tau	intra-protein xl	369	280	89	2685.52	538.111	5	-0.7	2	32.9
VTSKCGSLGNIHHKPGGGQVEVK-LDLSNVQSKCGSK-a4-b9	WT_Tau	WT_Tau	intra-protein xl	321	290	31	3961.01	991.26	4	-1.5	3	32.63
IGSTENLKHQPGGGK-KIETHK-a8-b1	WT_Tau	WT_Tau	intra-protein xl	267	370	103	2414.29	604.58	4	-0.8	1	32.37
KLDLSNVQSK-CGSKDNIK-a1-b4	WT_Tau	WT_Tau	intra-protein xl	281	294	13	2189.13	548.291	4	-0.9	6	32.28
VQSKIGSLDNITHVPGGGNK-K4-K20	WT_Tau	-	intralink	353	369	16	2158.14	720.386	3	-1.1	7	32.25
VQSKIGSLDNITHVPGGGNK-IGSTENLKHQPGGGK-a4-b8	WT_Tau	WT_Tau	intra-protein xl	353	267	86	3679.92	920.989	4	-1.3	1	32.25
VQSKIGSLDNITHVPGGGNK-KIETHK-a4-b1	WT_Tau	WT_Tau	intra-protein xl	353	370	17	2912.57	583.522	5	-0.4	6	32.16
DNIKHVPGGGSVQIVYKPVDLSK-KLDLSNVQSKCGSK-a4-b10	WT_Tau	WT_Tau	intra-protein xl	298	290	8	4150.2	692.709	6	-1.1	3	32.04
HVPGGGSVQIVYKPVDLSK-KLDLSNVQSK-a13-b1	WT_Tau	WT_Tau	intra-protein xl	311	281	30	3247.78	650.564	5	-0.3	3	31.59
VTSKCGSLGNIHHKPGGGQVEVK-KIETHK-a4-b1	WT_Tau	WT_Tau	intra-protein xl	321	370	49	3280.73	1094.59	3	-1.4	2	31.3
KIETHK-LDFKDR-a1-b4	WT_Tau	WT_Tau	intra-protein xl	370	347	23	1684.91	422.236	4	-1.6	2	31.2
CGSLGNIHHKPGGGQVEVKSEK-K10-K19	WT_Tau	-	intralink	331	340	9	2455.23	819.417	3	-0.7	23	30.87
CGSKDNIKHVPGGGSVQIVYKPVDLSK-K4-K8	WT_Tau	-	intralink	294	298	4	3019.58	755.903	4	-0.2	6	30.69
IGSTENLKHQPGGGKVQIINK-K15-156	WT_Tau	-	monolink	274	n/a	-	2373.3	594.332	4	-1.6	2	30.53
CGSLGNIHHKPGGGQVEVK-VQIINKK-a10-b6	WT_Tau	WT_Tau	intra-protein xl	331	280	51	2952.59	739.157	4	-0.5	1	30.45
IGSTENLKHQPGGGK-LDFKDR-a8-b4	WT_Tau	WT_Tau	intra-protein xl	267	347	80	2452.27	491.462	5	-0.9	1	30.42
IGSTENLKHQPGGGK-KLDLSNVQSKCGSK-a8-b10	WT_Tau	WT_Tau	intra-protein xl	267	290	23	3222.66	806.674	4	-0.6	2	30.37
DNIKHVPGGGSVQIVYKPVDLSK-KLDLSNVQSK-a4-b1	WT_Tau	WT_Tau	intra-protein xl	298	281	17	3718.02	620.678	6	-1.8	6	30.32
IGSTENLKHQPGGGK-LDLSNVQSKCGSK-a8-b9	WT_Tau	WT_Tau	intra-protein xl	267	290	23	3094.57	619.922	5	-0.7	1	30.17
DNIKHVPGGGSVQIVYKPVDLSK-LDLSNVQSKCGSK-a4-b9	WT_Tau	WT_Tau	intra-protein xl	298	290	8	4022.11	1006.54	4	0.1	1	30.13
HVPGGGSVQIVYKPVDLSK-SKIGSTENLK-a13-b2	WT_Tau	WT_Tau	intra-protein xl	311	259	52	3192.74	799.192	4	-0.7	2	30.04
DNIKHVPGGGSVQIVYKPVDLSK-SEKLDFK-a4-b3	WT_Tau	WT_Tau	intra-protein xl	298	343	45	3452.85	864.221	4	-0.3	1	29.97
VQSKIGSLDNITHVPGGGNKK-LDFKDR-a4-b4	WT_Tau	WT_Tau	intra-protein xl	353	347	6	3078.64	616.737	5	-0.8	3	29.77
CGSLGNIHHKPGGGQVEVK-IGSTENLKHQPGGGK-a10-b8	WT_Tau	WT_Tau	intra-protein xl	331	267	64	3632.84	909.219	4	-1.2	1	29.75
VQSKIGSLDNITHVPGGGNKK-K4-K20	WT_Tau	-	intralink	353	369	16	2286.23	763.085	3	-0.5	8	29.75
VQIINKK-KIETHK-a6-b1	WT_Tau	WT_Tau	intra-protein xl	280	370	90	1734.04	434.517	4	-3.2	1	29.58
HVPGGGSVQIVYKPVDLSKVTSK-LDFKDR-a19-b4	WT_Tau	WT_Tau	intra-protein xl	317	347	30	3324.8	665.968	5	-1.5	1	29.39
CGSKDNIKHVPGGGSVQIVYKPVDLSK-K8-156	WT_Tau	-	monolink	298	n/a	-	3037.59	608.526	5	-0.6	13	29.31
IGSLDNITHVPGGGNKK-IETHKLTFR-a16-b5	WT_Tau	WT_Tau	intra-protein xl	369	375	6	2987.62	498.944	6	-0.7	1	29.3
CGSLGNIHHKPGGGQVEVK-KLDLSNVQSKCGSK-a10-b10	WT_Tau	WT_Tau	intra-protein xl	331	290	41	3673.86	919.473	4	-1.3	1	29.29
DNIKHVPGGGSVQIVYKPVDLSK-SKIGSTENLK-a4-b2	WT_Tau	WT_Tau	intra-protein xl	298	259	39	3662.99	1222.01	3	0.7	2	29.02
DRVQSKIGSLDNITHVPGGGNK-K6-155	WT_Tau	-	monolink	353	n/a	-	2446.29	612.58	4	-2	1	29
CGSLGNIHHKPGGGQVEVKSEK-LDFKDR-a10-b4	WT_Tau	WT_Tau	intra-protein xl	331	347	16	3247.64	542.281	6	-1.2	1	28.96
IGSLDNITHVPGGGNKK-LDFKDR-a16-b4	WT_Tau	WT_Tau	intra-protein xl	369	347	22	2636.39	528.286	5	-1.2	3	28.67
DNIKHVPGGGSVQIVYKPVDLSK-K4-K23	WT_Tau	-	intralink	298	317	19	2587.4	647.857	4	-0.9	1	28.54
SEKLDFKDR-KIETHK-a7-b1	WT_Tau	WT_Tau	intra-protein xl	347	370	23	2029.08	677.368	3	-1.2	1	28.49
DNIKHVPGGGSVQIVYKPVDLSK-KIETHK-a4-b1	WT_Tau	WT_Tau	intra-protein xl	298	370	72	3341.83	557.979	6	-1.7	1	28.47
CGSLGNIHHKPGGGQVEVK-LDLSNVQSKCGSK-a10-b9	WT_Tau	WT_Tau	intra-protein xl	331	290	41	3545.77	1182.93	3	-0.2	1	28.44
HVPGGGSVQIVYKPVDLSKVTSK-SEKLDFK-a19-b3	WT_Tau	WT_Tau	intra-protein xl	317	343	26	3397.84	680.577	5	-1.4	1	28.09
VQIINKKLDLSNVQSK-K16-156	WT_Tau	-	monolink	290	n/a	-	1982.14	496.543	4	-0.5	1	27.86
IGSLDNITHVPGGGNKK-SKIGSTENLK-a16-b2	WT_Tau	WT_Tau	intra-protein xl	369	259	110	2919.56	974.195	3	-1.8	2	27.85
VQSKIGSLDNITHVPGGGNKK-SEKLDFK-a4-b3	WT_Tau	WT_Tau	intra-protein xl	353	343	10	3151.68	788.929	4	-0.8	1	27.81
VTSKCGSLGNIHHKPGGGQVEVK-K14-156	WT_Tau	-	monolink	331	n/a	-	2544.31	849.11	3	-2.1	13	27.57
CGSLGNIHHKPGGGQVEVKSEK-VQSKIGSLDNITHVPGGGNK-a19-b4	WT_Tau	WT_Tau	intra-protein xl	340	353	13	4475.28	896.064	5	-4.1	2	27.06
IGSTENLKHQPGGGKVQIINK-K8-K15	WT_Tau	-	intralink	267	274	7	2355.29	786.104	3	-1.7	3	26.84
NVKSKIGSTENLK-K5-156	WT_Tau	-	monolink	259	n/a	-	1572.87	394.225	4	-1.9	1	26.68
KIETHKLTFR-K1-K6	WT_Tau	-	intralink	370	375	5	1409.8	470.941	3	-2.1	5	26.42
CGSKDNIKHVPGGGSVQIVYKPVDLSK-K4-156	WT_Tau	-	monolink	294	n/a	-	3037.59	608.525	5	-1.3	11	26.35
CGSLGNIHHKPGGGQVEVKSEK-IGSLDNITHVPGGGNKK-a19-b16	WT_Tau	WT_Tau	intra-protein xl	340	369	29	4161.14	1041.29	4	-0.3	1	26.26
CGSLGNIHHKPGGGQVEVKSEKLDFK-K19-K22	WT_Tau	-	intralink	340	343	3	2958.5	987.175	3	-0.4	2	26.14
CGSLGNIHHKPGGGQVEVKSEKLDFK-K10-K22	WT_Tau	-	intralink	331	343	12	2958.5	987.174	3	-0.7	1	26.07
HVPGGGSVQIVYKPVDLSKVTSK-K13-155	WT_Tau	-	monolink	311	n/a	-	2549.42	638.362	4	-2.4	3	25.94
DRVQSKIGSLDNITHVPGGGNK-KLDLSNVQSK-a6-b1	WT_Tau	WT_Tau	intra-protein xl	353	281	72	3559.89	890.982	4	-0.3	2	25.75
VQIINKKLDLSNVQSK-K7-156	WT_Tau	-	monolink	281	n/a	-	1982.14	661.721	3	-0.1	3	25.73
CGSLGNIHHKPGGGQVEVKSEK-K10-156	WT_Tau	-	monolink	331	n/a	-	2473.23	619.316	4	-2.5	4	25.48
SKIGSTENLKHQPGGGK-K2-156	WT_Tau	-	monolink	259	n/a	-	1892.99	632.006	3	-1.2	3	25.27
SKIGSTENLKHQPGGGK-K2-K10	WT_Tau	-	intralink	259	267	8	1874.98	626.002	3	-1.4	6	24.96
VQSKIGSLDNITHVPGGGNK-HVPGGGSVQIVYKPVDLSK-a4-b13	WT_Tau	WT_Tau	intra-protein xl	353	311	42	4137.22	828.451	5	-1.4	1	24.77
VTSKCGSLGNIHHKPGGGQVEVK-HVPGGGSVQIVYKPVDLSK-a4-b13	WT_Tau	WT_Tau	intra-protein xl	321	311	10	4505.38	902.085	5	-0.3	6	24.67
CGSLGNIHHKPGGGQVEVK-HVPGGGSVQIVYKPVDLSK-a10-b13	WT_Tau	WT_Tau	intra-protein xl	331	311	20	4090.14	819.036	5	-0.8	3	24.54
VQSKIGSLDNITHVPGGGNK-HQPGGGKVQIINK-a4-b7	WT_Tau	WT_Tau	intra-protein xl	353	274	79	3532.91	707.589	5	-1.1	2	24.34
IGSLDNITHVPGGGNKK-SEKLDFKDR-a16-b3	WT_Tau	WT_Tau	intra-protein xl	369	343	26	2980.56	994.528	3	-0.3	4	24.05
HQPGGGKVQIINK-CGSKDNIK-a7-b4	WT_Tau	WT_Tau	intra-protein xl	274	294	20	2433.28	812.1	3	-1.2	1	23.93
KLDLSNVQSKCGSK-K1-K10	WT_Tau	-	intralink	281	290	9	1700.88	567.966	3	-1.2	3	23.91
HVPGGGSVQIVYKPVDLSK-K19-156	WT_Tau	-	monolink	317	n/a	-	2135.16	712.729	3	-0.1	13	23.81
DNIKHVPGGGSVQIVYKPVDLSK-HQPGGGKVQIINK-a4-b7	WT_Tau	WT_Tau	intra-protein xl	298	274	24	3962.17	793.442	5	-0.5	1	23.8
LDLSNVQSKCGSKDNIK-K17-155	WT_Tau	-	monolink	298	n/a	-	2060.06	687.693	3	-1.3	1	23.66
VTSKCGSLGNIHHKPGGGQVEVK-SQVNSLDLKK-a4-b9	WT_Tau	reverse_WT_Tau	intra-protein xl	321	161	160	3656.93	915.24	4	-1	1	23.62
DGSKPPEGSSPPTKPAPPTK-IGSTENLKHQPGGGK-a4-b8	reverse_WT_Tau	WT_Tau	intra-protein xl	252	267	15	3633.85	909.471	4	-3.1	1	23.39
SEKLDFKDR-K7-156	WT_Tau	-	monolink	347	n/a	-	1292.66	431.894	3	-1.3	5	23.39
VTSKCGSLGNIHHKPGGGQVEVK-IGSTENLKHQPGGGK-a4-b8	WT_Tau	WT_Tau	intra-protein xl	321	267	54	4048.09	810.626	5	0.5	1	23.2
HVPGGGSVQIVYKPVDLSKVTSKCGSLGNIHHKPGGGQVEVK-K19-K23	WT_Tau	-	intralink	317	321	4	4487.37	1122.85	4	-0.1	1	23.15
VQSKIGSLDNITHVPGGGNK-CGSLGNIHHKPGGGQVEVK-a4-b10	WT_Tau	WT_Tau	intra-protein xl	353	331	22	4131.12	1033.79	4	-0.7	3	23.02
LDFKDRVQSK-K4-156	WT_Tau	-	monolink	347	n/a	-	1390.74	464.589	3	-1.5	1	22.66
IGSTENLKHQPGGGK-K8-K15	WT_Tau	-	intralink	267	274	7	1659.86	554.293	3	-1.5	4	22.33
DGSKPPEGSSPPTKPAPPTK-KLDLSNVQSKCGSK-a14-b10	reverse_WT_Tau	WT_Tau	intra-protein xl	262	290	28	3674.87	919.725	4	-3.5	1	22.02
CGSLGNIHHKPGGGQVEVK-IGSLDNITHVPGGGNKK-a10-b16	WT_Tau	WT_Tau	intra-protein xl	331	369	38	3816.97	955.249	4	-1.3	3	21.92
IGSLDNITHVPGGGNKKIETHK-K16-K22	WT_Tau	-	intralink	369	375	6	2452.31	614.084	4	-0.3	2	21.63
DNIKHVPGGGSVQIVYKPVDLSK-DGSKPPEGSSPPTKPAPPTK-a4-b4	WT_Tau	reverse_WT_Tau	intra-protein xl	298	252	46	4561.39	1141.36	4	-4.2	1	21.38
KIETHKLTFR-K1-156	WT_Tau	-	monolink	370	n/a	-	1427.81	357.96	4	-2.5	1	21.31
IGSLDNITHVPGGGNKK-HQPGGGKVQIINK-a16-b7	WT_Tau	WT_Tau	intra-protein xl	369	274	95	3218.75	805.695	4	-1.5	16	21.21
VQSKIGSLDNITHVPGGGNK-SQVNSLDLKK-a4-b9	WT_Tau	reverse_WT_Tau	intra-protein xl	353	161	192	3288.77	823.2	4	-0.2	3	20.79
VQSKIGSLDNITHVPGGGNK-LDLSNVQSKCGSK-a4-b9	WT_Tau	WT_Tau	intra-protein xl	353	290	63	3592.85	899.22	4	-0.9	1	20.77
VTSKCGSLGNIHHKPGGGQVEVK-HQPGGGKVQIINK-a4-b7	WT_Tau	WT_Tau	intra-protein xl	321	274	47	3901.07	781.222	5	-1.3	1	20.64
KLDLSNVQSK-SEKLDFK-a1-b3	WT_Tau	WT_Tau	intra-protein xl	281	343	62	2134.15	712.391	3	-1.2	5	20.59
VTSKCGSLGNIHHKPGGGQVEVK-K4-K23	WT_Tau	-	intralink	321	340	19	2526.3	506.268	5	-0.8	9	20.59
HQPGGGKVQIINK-K7-K13	WT_Tau	-	intralink	274	280	6	1512.84	505.288	3	-0.4	2	20.59
TPPKSPSSAK-ENAKAK-a4-b4	WT_Tau	WT_Tau	intra-protein xl	234	383	149	1795.97	450	4	1.4	1	20.07
SKASSPSKPPTR-AKANER-a8-b2	reverse_WT_Tau	reverse_WT_Tau	intra-protein xl	208	59	149	2067.1	517.782	4	-4.7	1	20
NGGGPVHTINDLSGIKSQVR-K16-155	reverse_WT_Tau	-	monolink	89	n/a	-	2203.16	551.798	4	-4.7	7	19.98
GGGPQHKLNETSGIK-K7-K15	reverse_WT_Tau	-	intralink	175	183	8	1659.86	554.294	3	-0.4	2	19.88
VTSKCGSLGNIHHKPGGGQVEVK-HVPGGGSVQIVYKPVDLSK-a14-b13	WT_Tau	WT_Tau	intra-protein xl	331	311	20	4505.38	644.634	7	-0.9	3	19.73
IGSTENLKHQPGGGK-SQVNSLDLKK-a8-b9	WT_Tau	reverse_WT_Tau	intra-protein xl	267	161	106	2790.49	559.105	5	-1	7	19.54
IGSTENLKHQPGGGK-SEKLDFK-a8-b3	WT_Tau	WT_Tau	intra-protein xl	267	343	76	2525.31	842.778	3	-0.8	1	19.53
VQIINKKLDLSNVQSK-K6-156	WT_Tau	-	monolink	280	n/a	-	1982.14	496.542	4	-1.3	1	19.46
VTSKCGSLGNIHHKPGGGQVEVKSEK-K4-K23	WT_Tau	-	intralink	321	340	19	2870.47	957.831	3	-0.7	3	19.34
DNIKHVPGGGSVQIVYKPVDLSK-SQVNSLDLKK-a4-b9	WT_Tau	reverse_WT_Tau	intra-protein xl	298	161	137	3718.03	744.614	5	-0.5	1	19.13
HVPGGGSVQIVYKPVDLSKVTSK-KLDLSNVQSK-a19-b1	WT_Tau	WT_Tau	intra-protein xl	317	281	36	3663.03	1222.02	3	0.2	6	18.95
GGGPQHKLNETSGIKSK-K7-K15	reverse_WT_Tau	-	intralink	175	183	8	1874.98	626.002	3	-0.6	1	18.91
TANAQGKQGPPAAGRPTAIK-TPPAPKTPPSSGEPPK-a7-b6	reverse_WT_Tau	WT_Tau	intra-protein xl	279	180	99	3657.93	915.491	4	-4.6	1	18.88
HVPGGGSVQIVYKPVDLSKVTSKCGSLGNIHHKPGGGQVEVK-K33-K42	WT_Tau	-	intralink	331	340	9	4487.37	748.903	6	-0.6	1	18.63
HVPGGGSVQIVYKPVDLSK-IGSTENLKHQPGGGK-a13-b8	WT_Tau	WT_Tau	intra-protein xl	311	267	44	3638.94	1213.99	3	-0.3	2	18.53
HVPGGGSVQIVYKPVDLSK-HQPGGGKVQIINK-a13-b7	WT_Tau	WT_Tau	intra-protein xl	311	274	37	3491.93	873.989	4	-0.2	1	18.39
VQSKIGSLDNITHVPGGGNK-KLDLSNVQSKCGSK-a4-b10	WT_Tau	WT_Tau	intra-protein xl	353	290	63	3720.94	745.196	5	-2	1	18.2
IGSLDNITHVPGGGNKKIETHK-K17-156	WT_Tau	-	monolink	370	n/a	-	2470.31	495.071	5	-1.8	3	18
DGSKPPEGSSPPTKPAPPTK-SEKLDFK-a4-b3	reverse_WT_Tau	WT_Tau	intra-protein xl	252	343	91	2977.51	993.513	3	-4.4	1	17.68
SKASSPSKPPTR-KIETHK-a2-b1	reverse_WT_Tau	WT_Tau	intra-protein xl	202	370	168	2134.18	712.401	3	2.3	16	17.65
CGSLGNIHHKPGGGQVEVKSEKLDFK-K19-156	WT_Tau	-	monolink	340	n/a	-	2976.51	745.135	4	-1	1	17.43
GDAGKAK-GDAGKAK-a5-b5	reverse_WT_Tau	reverse_WT_Tau	intra-protein xl	299	299	0	1428.76	477.261	3	1.5	2	17.39
CGSLGNIHHKPGGGQVEVKSEK-IGSTENLKHQPGGGK-a19-b8	WT_Tau	WT_Tau	intra-protein xl	340	267	73	3977.01	995.26	4	-2.3	1	17.37
DGSKPPEGSSPPTKPAPPTK-IGSLDNITHVPGGGNKK-a4-b16	reverse_WT_Tau	WT_Tau	intra-protein xl	252	369	117	3817.97	1273.66	3	-3.6	2	17.34
HVPGGGSVQIVYKPVDLSK-SEKLDFKDR-a13-b3	WT_Tau	WT_Tau	intra-protein xl	311	343	32	3253.73	814.441	4	-0.6	1	17.3
KLDLSNVQSKCGSK-LNETSGIKSKVNK-a1-b10	WT_Tau	reverse_WT_Tau	intra-protein xl	281	185	96	3117.66	520.618	6	-2.7	4	16.93
IGSLDNITHVPGGGNKK-SQVNSLDLKK-a16-b9	WT_Tau	reverse_WT_Tau	intra-protein xl	369	161	208	2974.61	595.929	5	-0.4	1	16.92
DGSKPPEGSSPPTKPAPPTK-IGSLDNITHVPGGGNKK-a14-b16	reverse_WT_Tau	WT_Tau	intra-protein xl	262	369	107	3817.97	955.5	4	-4.3	1	16.85
SGCKSQVNSLDLK-KNIIQVK-a4-b1	reverse_WT_Tau	reverse_WT_Tau	intra-protein xl	152	162	10	2414.32	604.589	4	1.7	1	16.64
DGSKPPEGSSPPTKPAPPTK-HVPGGGSVQIVYKPVDLSK-a4-b13	reverse_WT_Tau	WT_Tau	intra-protein xl	252	311	59	4091.14	1364.72	3	-3.4	2	16.59
HVPGGGSVQIVYKPVDLSK-IGSLDNITHVPGGGNKK-a13-b16	WT_Tau	WT_Tau	intra-protein xl	311	369	58	3823.06	956.773	4	-0.6	1	16.41
CGSLGNIHHKPGGGQVEVK-HQPGGGKVQIINK-a10-b7	WT_Tau	WT_Tau	intra-protein xl	331	274	57	3485.83	872.465	4	-1.3	1	16.39
HVPGGGSVQIVYKPVDLSKVTSK-DGSKPPEGSSPPTKPAPPTK-a19-b4	WT_Tau	reverse_WT_Tau	intra-protein xl	317	252	65	4506.38	1127.6	4	-3.9	2	16.19
KLDLSNVQSKCGSK-LNETSGIKSKVNK-a1-b8	WT_Tau	reverse_WT_Tau	intra-protein xl	281	183	98	3117.66	520.618	6	-2.7	1	15.98
SKIGSTENLKHQPGGGK-K2-K17	WT_Tau	-	intralink	259	274	15	1874.98	626.002	3	-1.1	4	15.94
GGGPQHKLNETSGIK-FDLKESK-a7-b4	reverse_WT_Tau	reverse_WT_Tau	intra-protein xl	175	99	76	2525.32	506.073	5	4.4	1	15.78
HVPGGGSVQIVYKPVDLSK-SEKLDFKDR-a13-b7	WT_Tau	WT_Tau	intra-protein xl	311	347	36	3253.73	1085.59	3	-1.3	1	15.71
VTSKCGSLGNIHHKPGGGQVEVK-CGSKDNIK-a4-b4	WT_Tau	WT_Tau	intra-protein xl	321	294	27	3446.74	862.692	4	-0.8	1	15.26
KLDLSNVQSKCGSK-K1-K14	WT_Tau	-	intralink	281	294	13	1700.87	567.965	3	-2.4	9	15.25
ENAKAKTDHGAEIVYK-ENAKAK-a6-b4	WT_Tau	WT_Tau	intra-protein xl	385	383	2	2570.32	643.589	4	-3.5	1	15.06
KLDLSNVQSK-K1-K10	WT_Tau	-	intralink	281	290	9	1268.69	423.906	3	-2.1	1	14.93
CGSLGNIHHKPGGGQVEVKSEKLDFK-K10-K19	WT_Tau	-	intralink	331	340	9	2958.5	592.708	5	0	2	14.87
GGGPQHKLNETSGIKSK-LNETSGIKSK-a15-b8	reverse_WT_Tau	reverse_WT_Tau	intra-protein xl	183	183	0	2950.59	591.125	5	4.5	2	14.85
GGGPQHKLNETSGIKSK-K7-K17	reverse_WT_Tau	-	intralink	175	185	10	1874.98	626.002	3	-1.4	1	14.84
DGSKPPEGSSPPTKPAPPTK-SEKLDFKDR-a4-b3	reverse_WT_Tau	WT_Tau	intra-protein xl	252	343	91	3248.64	1083.89	3	-3.6	4	14.7
LNETSGIKSKVNK-SKSVXR-a8-b2	reverse_WT_Tau	reverse_WT_Tau	intra-protein xl	183	312	129	2277.23	456.454	5	-2.9	1	14.65
SQVNSLDLKK-LDFKDR-a9-b4	reverse_WT_Tau	WT_Tau	intra-protein xl	161	347	186	2061.11	688.044	3	-0.6	1	14.64
HVPGGGSVQIVYKPVDLSKVTSK-SKIGSTENLK-a19-b2	WT_Tau	WT_Tau	intra-protein xl	317	259	58	3607.98	903.003	4	-0.1	1	14.53
DNIKHVPGGGSVQIVYKPVDLSKVTSK-K4-K23	WT_Tau	-	intralink	298	317	19	3002.64	751.669	4	-0.2	2	14.47
TPPAPKTPPSSGEPPK-KIETHK-a6-b1	WT_Tau	WT_Tau	intra-protein xl	180	370	190	2479.32	827.45	3	-2.9	1	14.41
KNGGGPVHTINDLSGIK-K1-K17	reverse_WT_Tau	-	intralink	73	89	16	1843.98	615.667	3	-1	3	14.39
DNIKHVPGGGSVQIVYKPVDLSK-K17-156	WT_Tau	-	monolink	311	n/a	-	2605.41	652.361	4	0.7	4	14.3
VEVQGGGPKHHINGLSGCKSTVK-K9-156	reverse_WT_Tau	-	monolink	111	n/a	-	2544.31	509.87	5	-0.9	4	14.29
VEVQGGGPKHHINGLSGCKSTVK-K19-156	reverse_WT_Tau	-	monolink	121	n/a	-	2544.31	637.086	4	0.6	1	14.18
SQVNSLDLKK-INDKSGCK-a9-b4	reverse_WT_Tau	reverse_WT_Tau	intra-protein xl	161	148	13	2189.13	548.291	4	-1	1	14.11
LQTAPVPMPDLKNVK-SKSVXR-a12-b2	WT_Tau	reverse_WT_Tau	intra-protein xl	254	312	58	2510.36	628.597	4	-0.9	1	14.09
HVPGGGSVQIVYKPVDLSKVTSK-IGSTENLKHQPGGGK-a19-b8	WT_Tau	WT_Tau	intra-protein xl	317	267	50	4054.18	811.843	5	-1.9	1	14.05
SGCKSQVNSLDLK-YVIEAGHDTKAK-a4-b10	reverse_WT_Tau	reverse_WT_Tau	intra-protein xl	152	57	95	2903.47	726.875	4	-0.2	1	13.98
SKASSPSKPPTR-HTEIKK-a8-b5	reverse_WT_Tau	reverse_WT_Tau	intra-protein xl	208	72	136	2134.17	534.551	4	-1	2	13.98
HQPGGGKVQIINK-SGCKSQVNSLDLK-a7-b4	WT_Tau	reverse_WT_Tau	intra-protein xl	274	152	122	2947.55	983.526	3	-0.4	1	13.89
KLDLSNVQSKCGSK-NVKSKIGSTENLK-a10-b5	WT_Tau	WT_Tau	intra-protein xl	290	259	31	3117.66	780.424	4	-2.1	4	13.82
KLDLSNVQSK-LNETSGIKSK-a1-b8	WT_Tau	reverse_WT_Tau	intra-protein xl	281	183	98	2344.28	587.079	4	-0.9	1	13.81
LDLSNVQSKCGSK-STVKSLDVPK-a9-b4	WT_Tau	reverse_WT_Tau	intra-protein xl	290	125	165	2645.41	882.81	3	4	1	13.81
FDLKESKVEVQGGGPK-ASSPSKPPTR-a7-b6	reverse_WT_Tau	reverse_WT_Tau	intra-protein xl	102	208	106	2881.52	721.389	4	1.9	2	13.79
TPPKSPSSAKSR-KIETHK-a4-b1	WT_Tau	WT_Tau	intra-protein xl	234	370	136	2134.18	712.402	3	3.2	14	13.47
HVPGGGSVQIVYKPVDLSKVTSK-DGSKPPEGSSPPTKPAPPTK-a13-b4	WT_Tau	reverse_WT_Tau	intra-protein xl	311	252	59	4506.38	1127.6	4	-3.9	5	13.43
KAKGADGK-AKGADGK-a3-b2	WT_Tau	WT_Tau	intra-protein xl	143	143	0	1556.86	519.96	3	2.1	1	13.41
HVPGGGSVQIVYKPVDLSK-INDKSGCK-a13-b4	WT_Tau	reverse_WT_Tau	intra-protein xl	311	148	163	3037.59	608.525	5	-1.3	2	13.24
IATPRGAAPPGQKGQANATR-ESKVEVQGGGPK-a13-b3	WT_Tau	reverse_WT_Tau	intra-protein xl	163	102	61	3312.77	829.2	4	3.9	1	13.12
SKASSPSKPPTR-KIETHK-a8-b1	reverse_WT_Tau	WT_Tau	intra-protein xl	208	370	162	2134.18	712.4	3	0.8	5	13.09
CGSLGNIHHKPGGGQVEVKSEK-K22-155	WT_Tau	-	monolink	343	n/a	-	2472.26	825.093	3	0.1	1	13.07
SQVNSLDLKK-CGSKDNIK-a9-b4	reverse_WT_Tau	WT_Tau	intra-protein xl	161	294	133	2189.14	730.72	3	-0.4	5	13.04
HTEIKKNGGGPVHTINDLSGIK-K6-156	reverse_WT_Tau	-	monolink	73	n/a	-	2470.31	495.071	5	-1.8	1	12.77
GGGPQHKLNETSGIKSK-SKASSPSKPPTR-a15-b2	reverse_WT_Tau	reverse_WT_Tau	intra-protein xl	183	202	19	3116.66	624.34	5	0.4	1	12.74
DGSKPPEGSSPPTKPAPPTKAPIR-DKFDLKESK-a14-b6	reverse_WT_Tau	reverse_WT_Tau	intra-protein xl	262	99	163	3657.94	610.664	6	3.5	1	12.74
DNIKHVPGGGSVQIVYKPVDLSKVTSK-K23-156	WT_Tau	-	monolink	317	n/a	-	3020.65	605.138	5	-1	1	12.64
HVPGGGSVQIVYKPVDLSK-K19-155	WT_Tau	-	monolink	317	n/a	-	2134.17	712.398	3	-4.2	12	12.57
KLDLSNVQSKCGSK-NVKSKIGSTENLK-a10-b3	WT_Tau	WT_Tau	intra-protein xl	290	257	33	3117.66	1040.23	3	-3.7	4	12.55
HVPGGGSVQIVYKPVDLSK-SGCKSQVNSLDLKK-a13-b13	WT_Tau	reverse_WT_Tau	intra-protein xl	311	161	150	3679.96	1227.66	3	-0.9	1	12.51
TANAQGKQGPPAAGRPTAIK-FDLKESK-a7-b4	reverse_WT_Tau	reverse_WT_Tau	intra-protein xl	279	99	180	2936.57	735.15	4	-1.1	1	12.37
HVPGGGSVQIVYKPVDLSK-CGSKDNIK-a13-b4	WT_Tau	WT_Tau	intra-protein xl	311	294	17	3037.59	608.525	5	-1.3	4	12.27
VEVQGGGPKHHINGLSGCK-K9-K19	reverse_WT_Tau	-	intralink	111	121	10	2111.05	704.692	3	-2	12	12.23
VAVVRTPPKSPSSAK-IETHKLTFRENAK-a9-b5	WT_Tau	WT_Tau	intra-protein xl	234	375	141	3246.8	650.367	5	-3.5	1	12.1
VNKLDPMPVPATQLRSK-INDKSGCK-a3-b4	reverse_WT_Tau	reverse_WT_Tau	intra-protein xl	188	148	40	2951.55	738.896	4	-1.4	1	11.76
DNIKHVPGGGSVQIVYKPVDLSK-K4-K17	WT_Tau	-	intralink	298	311	13	2587.41	863.477	3	3	5	11.66
IGSLDNITHVPGGGNKKIETHK-K16-156	WT_Tau	-	monolink	369	n/a	-	2470.31	495.071	5	-1.4	1	11.49
HQPGGGKVQIINKK-SKDGTGSDDKK-a13-b10	WT_Tau	WT_Tau	intra-protein xl	280	140	140	2777.46	926.828	3	-2.3	1	11.46
GGGPQHKLNETSGIKSK-TPPKSPSSAKSR-a7-b10	reverse_WT_Tau	WT_Tau	intra-protein xl	175	240	65	3116.65	624.337	5	-3.4	1	11.37
HVPGGGSVQIVYKPVDLSKVTSK-CGSLGNIHHKPGGGQVEVK-a13-b10	WT_Tau	WT_Tau	intra-protein xl	311	331	20	4505.38	902.085	5	-0.3	1	11.36
TPSLPTPPTREPKK-SKDGTGSDDKK-a13-b2	WT_Tau	WT_Tau	intra-protein xl	224	132	92	2822.48	706.627	4	4.3	1	11.34
IGSLDNITHVPGGGNKK-FDLKESK-a16-b4	WT_Tau	reverse_WT_Tau	intra-protein xl	369	99	270	2709.43	542.894	5	-1.7	1	11.29
GGGPQHKLNETSGIKSK-LNETSGIKSK-a7-b8	reverse_WT_Tau	reverse_WT_Tau	intra-protein xl	175	183	8	2950.57	738.65	4	-1	1	11.12
CGSKDNIKHVPGGGSVQIVYKPVDLSK-K21-156	WT_Tau	-	monolink	311	n/a	-	3037.59	608.525	5	-0.8	2	11.03
HVPGGGSVQIVYKPVDLSK-GGGPQHKLNETSGIK-a13-b7	WT_Tau	reverse_WT_Tau	intra-protein xl	311	175	136	3638.93	910.741	4	-2.8	1	10.9
HHINGLSGCKSTVK-K10-156	reverse_WT_Tau	-	monolink	121	n/a	-	1692.86	424.223	4	-1.4	2	10.81
DGSKPPEGSSPPTKPAPPTK-IATPRGAAPPGQKGQANATR-a4-b13	reverse_WT_Tau	WT_Tau	intra-protein xl	252	163	89	4073.11	815.631	5	-3.8	1	10.8
TPPAPKTPPSSGEPPKSGDR-QGPPAAGRPTAIKTK-a16-b13	WT_Tau	reverse_WT_Tau	intra-protein xl	190	292	102	3631.93	1211.65	3	0	6	10.7
VEVQGGGPKHHINGLSGCKSTVK-K23-156	reverse_WT_Tau	-	monolink	125	n/a	-	2544.31	509.869	5	-2	1	10.67
LNETSGIKSK-SQVNSLDLKK-a8-b9	reverse_WT_Tau	reverse_WT_Tau	intra-protein xl	183	161	22	2344.28	587.079	4	-0.2	1	10.47
ESKVEVQGGGPKHHINGLSGCK-K12-K22	reverse_WT_Tau	-	intralink	111	121	10	2455.23	819.417	3	-0.3	1	10.47
TPPKSPSSAKSR-HTEIKK-a4-b5	WT_Tau	reverse_WT_Tau	intra-protein xl	234	72	162	2134.18	712.4	3	1.5	11	10.32
SLDVPKYVIQVSGGGPVHK-INDKSGCK-a6-b4	reverse_WT_Tau	reverse_WT_Tau	intra-protein xl	131	148	17	3037.59	608.525	5	-1.7	1	10.25
IPAKTPPAPKTPPSSGEPPK-K10-K20	WT_Tau	-	intralink	180	190	10	2134.18	712.4	3	3.9	11	10.23
HHINGLSGCKSTVK-ESKVEVQGGGPK-a10-b3	reverse_WT_Tau	reverse_WT_Tau	intra-protein xl	121	102	19	2888.48	963.834	3	-0.9	1	10.16
HVPGGGSVQIVYKPVDLSK-KLDLSNVQSKCGSK-a13-b10	WT_Tau	WT_Tau	intra-protein xl	311	290	21	3679.96	920.997	4	-1.2	1	10.09
DGTGSDDKKAK-AKANERFTLK-a9-b2	WT_Tau	reverse_WT_Tau	intra-protein xl	141	59	82	2435.28	812.766	3	4.2	1	10.05
ANERFTLKHTEIK-VQIINKK-a8-b6	reverse_WT_Tau	WT_Tau	intra-protein xl	67	280	213	2565.46	856.162	3	-1.1	2	9.94
CGSLGNIHHKPGGGQVEVK-K10-K19	WT_Tau	-	intralink	331	340	9	2111.06	528.772	4	0	15	9.89
STVKSLDVPKYVIQVSGGGPVHK-K23-156	reverse_WT_Tau	-	monolink	144	n/a	-	2550.4	851.142	3	-0.8	3	9.77
IETHKLTFRENAK-VQIINKK-a5-b6	WT_Tau	WT_Tau	intra-protein xl	375	280	95	2565.47	856.165	3	2.5	2	9.72
FDLKESKVEVQGGGPK-K4-K7	reverse_WT_Tau	-	intralink	99	102	3	1854.97	619.331	3	-1.4	1	9.68
HVPGGGSVQIVYKPVDLSK-TPSLPTPPTREPKK-a13-b13	WT_Tau	WT_Tau	intra-protein xl	311	224	87	3665.03	1222.68	3	3.2	1	9.67
VQSKIGSLDNITHVPGGGNKK-K20-155	WT_Tau	-	monolink	369	n/a	-	2303.26	768.76	3	-1.9	2	9.66
TANAQGKQGPPAAGRPTAIKTK-LDFKDRVQSK-a7-b4	reverse_WT_Tau	WT_Tau	intra-protein xl	279	347	68	3534.93	707.994	5	0.8	1	9.6
HVPGGGSVQIVYKPVDLSKVTSK-DGSKPPEGSSPPTKPAPPTK-a13-b14	WT_Tau	reverse_WT_Tau	intra-protein xl	311	262	49	4506.38	902.284	5	-3.9	2	9.59
VQSKIGSLDNITHVPGGGNKK-K21-156	WT_Tau	-	monolink	370	n/a	-	2304.24	577.069	4	0.1	1	9.58
VQSKIGSLDNITHVPGGGNKK-K4-K21	WT_Tau	-	intralink	353	370	17	2286.23	763.085	3	-0.7	1	9.44
DGSKPPEGSSPPTKPAPPTKAPIR-DKFDLKESK-a20-b6	reverse_WT_Tau	reverse_WT_Tau	intra-protein xl	268	99	169	3657.93	610.663	6	1.3	1	9.43
KNGGGPVHTINDLSGIKSQVR-K17-155	reverse_WT_Tau	-	monolink	89	n/a	-	2331.26	778.094	3	-4.5	1	9.42
SKASSPSKPPTR-HTEIKK-a2-b5	reverse_WT_Tau	reverse_WT_Tau	intra-protein xl	202	72	130	2134.18	712.4	3	1.5	4	9.35
IGSTENLKHQPGGGK-K15-156	WT_Tau	-	monolink	274	n/a	-	1677.87	560.297	3	-1.5	1	9.33
ESKVEVQGGGPK-DGTGSDDKKAK-a3-b9	reverse_WT_Tau	WT_Tau	intra-protein xl	102	141	39	2472.23	825.084	3	-1.9	2	9.24
NGGGPVHTINDLSGIKSQVRDK-SGCKSQVNSLDLKK-a16-b4	reverse_WT_Tau	reverse_WT_Tau	intra-protein xl	89	152	63	3992.09	1331.7	3	4.3	1	9.14
ESKVEVQGGGPK-VVAVKKPER-a3-b5	reverse_WT_Tau	reverse_WT_Tau	intra-protein xl	102	217	115	2376.34	793.122	3	2.4	12	9.14
TPPKSPSSAKSR-KIETHK-a10-b1	WT_Tau	WT_Tau	intra-protein xl	240	370	130	2134.18	712.401	3	2.3	4	9.1
LQTAPVPMPDLKNVKSK-INDKSGCK-a12-b4	WT_Tau	reverse_WT_Tau	intra-protein xl	254	148	106	2923.54	731.893	4	-3.5	1	9.02
GADGKTKIATPR-XVSKSK-a5-b4	WT_Tau	WT_Tau	intra-protein xl	148	130	18	2046.12	683.049	3	4.7	1	9.02
CGSLGNIHHKPGGGQVEVK-KPERTPPTPLSPTRSR-a10-b1	WT_Tau	reverse_WT_Tau	intra-protein xl	331	218	113	3930.06	787.02	5	-1.4	2	8.98
SKIGSTENLKHQPGGGK-TPPKSPSSAKSR-a10-b10	WT_Tau	WT_Tau	intra-protein xl	267	240	27	3116.66	624.339	5	-0.2	1	8.97
LQTAPVPXPDLKNVK-NVKSKIGSTENLK-a12-b5	WT_Tau	WT_Tau	intra-protein xl	254	259	5	3220.79	1074.6	3	3.7	4	8.89
HVPGGGSVQIVYKPVDLSKVTSK-DGSKPPEGSSPPTKPAPPTK-a19-b14	WT_Tau	reverse_WT_Tau	intra-protein xl	317	262	55	4506.38	752.071	6	-4.7	2	8.81
DRVQSKIGSLDNITHVPGGGNK-SQVNSLDLKK-a6-b9	WT_Tau	reverse_WT_Tau	intra-protein xl	353	161	192	3559.91	712.991	5	5	2	8.81
VQSKIGSLDNITHVPGGGNKK-K20-156	WT_Tau	-	monolink	369	n/a	-	2304.24	577.067	4	-2.2	1	8.79
SGCKSQVNSLDLKK-NVKSKIGSTENLK-a13-b5	reverse_WT_Tau	WT_Tau	intra-protein xl	161	259	98	3117.66	624.54	5	-2.7	1	8.77
HVPGGGSVQIVYKPVDLSK-KIETHK-a13-b1	WT_Tau	WT_Tau	intra-protein xl	311	370	59	2871.58	718.904	4	-0.8	1	8.74
LDPMPVPATQLRSKASSPSKPPTR-QGPPAAGRPTAIKTK-a14-b13	reverse_WT_Tau	reverse_WT_Tau	intra-protein xl	202	292	90	4190.28	839.065	5	-3.8	2	8.51
KNGGGPVHTINDLSGIKSQVR-VNKLDPMPVPATQLRSK-a17-b3	reverse_WT_Tau	reverse_WT_Tau	intra-protein xl	89	188	99	4207.31	1403.44	3	3.5	3	8.5
SLDVPKYVIQVSGGGPVHK-CGSKDNIK-a6-b4	reverse_WT_Tau	WT_Tau	intra-protein xl	131	294	163	3037.59	608.525	5	-1.7	1	8.46
DNIKHVPGGGSVQIVYKPVDLSKVTSK-K4-K27	WT_Tau	-	intralink	298	321	23	3002.64	1001.89	3	-0.3	2	8.32
HQPGGGKVQIINK-LDLSNVQSKCGSK-a7-b9	WT_Tau	WT_Tau	intra-protein xl	274	290	16	2947.55	983.526	3	-0.4	1	8.16
SPSSAKSRLQTAPVPMPDLK-SKSVXR-a6-b2	WT_Tau	reverse_WT_Tau	intra-protein xl	240	312	72	2969.57	594.922	5	1.1	1	8.14
TPPKSPSSAKSR-DGTGSDDKKAK-a4-b9	WT_Tau	WT_Tau	intra-protein xl	234	141	93	2500.28	834.436	3	2.6	1	8.13
DRVQSKIGSLDNITHVPGGGNK-NVKSKIGSTENLK-a6-b3	WT_Tau	WT_Tau	intra-protein xl	353	257	96	3846.08	962.527	4	4.3	1	8.09
SLDVPKYVIQVSGGGPVHK-K6-156	reverse_WT_Tau	-	monolink	131	n/a	-	2135.17	712.731	3	3.4	28	8.07
SLDVPKYVIQVSGGGPVHK-K19-156	reverse_WT_Tau	-	monolink	144	n/a	-	2135.17	712.732	3	4.4	5	8
GGGPQHKLNETSGIKSK-SKASSPSKPPTR-a7-b2	reverse_WT_Tau	reverse_WT_Tau	intra-protein xl	175	202	27	3116.66	1039.89	3	-0.1	2	7.98
ENAKAKTDHGAEIVYK-LQTAPVPMPDLKNVK-a4-b12	WT_Tau	WT_Tau	intra-protein xl	383	254	129	3560.91	713.19	5	4.8	1	7.93
HVPGGGSVQIVYKPVDLSKVTSKCGSLGNIHHKPGGGQVEVK-K13-156	WT_Tau	-	monolink	311	n/a	-	4505.38	751.905	6	-0.7	1	7.91
SGCKSQVNSLDLKK-TPPKSPSSAK-a4-b4	reverse_WT_Tau	WT_Tau	intra-protein xl	152	234	82	2699.42	540.893	5	2.9	1	7.89
SKIGSTENLKHQPGGGK-LNETSGIKSK-a2-b8	WT_Tau	reverse_WT_Tau	intra-protein xl	259	183	76	2950.59	591.125	5	4.5	2	7.87
GGGPQHKLNETSGIKSK-TPPKSPSSAK-a7-b4	reverse_WT_Tau	WT_Tau	intra-protein xl	175	234	59	2873.51	958.845	3	-4.2	1	7.86
GGGPQHKLNETSGIKSK-TPPKSPSSAKSR-a15-b4	reverse_WT_Tau	WT_Tau	intra-protein xl	183	234	51	3116.66	780.173	4	0.9	1	7.84
SKIGSTENLKHQPGGGK-SKASSPSKPPTR-a10-b2	WT_Tau	reverse_WT_Tau	intra-protein xl	267	202	65	3116.66	780.173	4	0.9	1	7.83
SKIGSTENLKHQPGGGK-SKASSPSKPPTR-a2-b2	WT_Tau	reverse_WT_Tau	intra-protein xl	259	202	57	3116.66	780.173	4	1	8	7.82
DGSKPPEGSSPPTKPAPPTKAPIRTANAQGK-KLDLSNVQSK-a4-b1	reverse_WT_Tau	WT_Tau	intra-protein xl	252	281	29	4350.3	1088.58	4	-3.4	2	7.78
TPPSSGEPPKSGDR-TPPSSGEPPKSGDR-a10-b10	WT_Tau	WT_Tau	intra-protein xl	190	190	0	2959.43	740.865	4	4	1	7.77
LDPMPVPATQLRSKASSPSKPPTR-AKANERFTLK-a20-b2	reverse_WT_Tau	reverse_WT_Tau	intra-protein xl	208	59	149	3875.12	776.031	5	2.4	1	7.75
FDLKESKVEVQGGGPK-IPAKTPPAPK-a4-b4	reverse_WT_Tau	WT_Tau	intra-protein xl	99	174	75	2873.6	719.409	4	4.3	1	7.72
TPPSSGEPPKSGDR-KNIIQVK-a10-b1	WT_Tau	reverse_WT_Tau	intra-protein xl	190	162	28	2390.28	797.769	3	1.1	1	7.69
LDLSNVQSKCGSKDNIK-TPSLPTPPTREPKK-a9-b13	WT_Tau	WT_Tau	intra-protein xl	290	224	66	3590.9	898.733	4	0.9	1	7.69
IGSTENLKHQPGGGKVQIINK-K15-K21	WT_Tau	-	intralink	274	280	6	2355.29	786.104	3	-0.5	1	7.61
TPPAPKTPPSSGEPPKSGDR-KAKGADGK-a16-b3	WT_Tau	WT_Tau	intra-protein xl	190	143	47	2913.52	729.387	4	-0.9	1	7.59
KNGGGPVHTINDLSGIK-FDLKESK-a1-b4	reverse_WT_Tau	reverse_WT_Tau	intra-protein xl	73	99	26	2709.43	542.894	5	-1.9	2	7.54
GGGPQHKLNETSGIK-IGSTENLKHQPGGGK-a7-b8	reverse_WT_Tau	WT_Tau	intra-protein xl	175	267	92	3181.65	1061.56	3	1.4	1	7.43
SLDVPKYVIQVSGGGPVHK-K6-155	reverse_WT_Tau	-	monolink	131	n/a	-	2134.18	712.401	3	-1	10	7.37
SEKLDFKDR-TKGDAGKAK-a3-b7	WT_Tau	reverse_WT_Tau	intra-protein xl	343	299	44	2149.14	717.387	3	-0.7	1	7.36
HTEIKKNGGGPVHTINDLSGIK-K5-K22	reverse_WT_Tau	-	intralink	72	89	17	2452.3	614.083	4	-2	1	7.28
NVKSKIGSTENLK-KLDLSNVQSK-a3-b1	WT_Tau	WT_Tau	intra-protein xl	257	281	24	2685.48	896.167	3	-4.6	2	7.27
NGGGPVHTINDLSGIKSQVRDK-LQTAPVPMPDLKNVKSK-a16-b15	reverse_WT_Tau	WT_Tau	intra-protein xl	89	257	168	4294.3	859.869	5	-1.5	1	7.24
ESKVEVQGGGPKHHINGLSGCK-SKASSPSKPPTR-a3-b8	reverse_WT_Tau	reverse_WT_Tau	intra-protein xl	102	208	106	3696.91	1233.31	3	2.1	1	7.16
DRVQSKIGSLDNITHVPGGGNK-LNETSGIKSKVNK-a6-b10	WT_Tau	reverse_WT_Tau	intra-protein xl	353	185	168	3846.07	962.525	4	2.4	4	7.12
HVPGGGSVQIVYKPVDLSKVTSK-K23-155	WT_Tau	-	monolink	321	n/a	-	2549.42	850.815	3	-0.8	1	7.08
SLDVPKYVIQVSGGGPVHK-K19-155	reverse_WT_Tau	-	monolink	144	n/a	-	2134.18	712.4	3	-2.4	7	7.05
SGCKSQVNSLDLKK-NVKSKIGSTENLK-a4-b3	reverse_WT_Tau	WT_Tau	intra-protein xl	152	257	105	3117.66	1040.23	3	-3	1	7.04
DNIKHVPGGGSVQIVYKPVDLSK-TKGDAGKAK-a4-b7	WT_Tau	reverse_WT_Tau	intra-protein xl	298	299	1	3461.89	866.48	4	0	2	7.03
TPPAPKTPPSSGEPPKSGDR-QGPPAAGRPTAIKTK-a6-b13	WT_Tau	reverse_WT_Tau	intra-protein xl	180	292	112	3631.92	1211.65	3	-3.7	3	7
DGSKPPEGSSPPTKPAPPTK-TPPAPKTPPSSGEPPKSGDR-a4-b16	reverse_WT_Tau	WT_Tau	intra-protein xl	252	190	62	4114.1	686.69	6	2.4	2	6.97
GGGPQHKLNETSGIK-GGGPQHKLNETSGIK-a7-b7	reverse_WT_Tau	reverse_WT_Tau	intra-protein xl	175	175	0	3181.65	1061.56	3	1.1	1	6.79
APIRTANAQGKQGPPAAGRPTAIK-LQTAPVPXPDLKNVKSK-a11-b12	reverse_WT_Tau	WT_Tau	intra-protein xl	279	254	25	4389.44	878.897	5	2.7	1	6.79
SGCKSQVNSLDLK-AKTDHGAEIVYK-a4-b2	reverse_WT_Tau	WT_Tau	intra-protein xl	152	385	233	2903.47	726.875	4	-0.2	1	6.75
FDLKESKVEVQGGGPK-LDLSNVQSKCGSK-a7-b9	reverse_WT_Tau	WT_Tau	intra-protein xl	102	290	188	3289.67	823.426	4	-4.6	1	6.73
GDAGKAKK-GDAGKAKK-a5-b5	reverse_WT_Tau	reverse_WT_Tau	intra-protein xl	299	299	0	1684.95	422.245	4	0.7	1	6.73
SGCKSQVNSLDLKK-K4-K14	reverse_WT_Tau	-	intralink	152	162	10	1700.88	567.966	3	-1	1	6.72
VTSKCGSLGNIHHKPGGGQVEVK-SPSSAKSR-a14-b6	WT_Tau	WT_Tau	intra-protein xl	331	240	91	3344.73	1115.92	3	0	1	6.69
ASSPSKPPTR-TKGDAGK-a6-b2	reverse_WT_Tau	reverse_WT_Tau	intra-protein xl	208	294	86	1839.97	614.33	3	-1.8	1	6.56
STVKSLDVPKYVIQVSGGGPVHK-KLDLSNVQSK-a4-b1	reverse_WT_Tau	WT_Tau	intra-protein xl	125	281	156	3663.01	916.761	4	-3.3	1	6.55
KNGGGPVHTINDLSGIK-K17-155	reverse_WT_Tau	-	monolink	89	n/a	-	1861.01	621.343	3	-1.2	5	6.52
IGSLDNITHVPGGGNKK-AKANERFTLK-a16-b2	WT_Tau	reverse_WT_Tau	intra-protein xl	369	59	310	3020.65	756.171	4	3.4	4	6.5
SGCKSQVNSLDLK-IPAKTPPAPK-a4-b4	reverse_WT_Tau	WT_Tau	intra-protein xl	152	174	22	2591.39	864.803	3	-5	1	6.45
IPAKTPPAPKTPPSSGEPPK-K4-K10	WT_Tau	-	intralink	174	180	6	2134.18	712.4	3	4.6	3	6.43
TDHGAEIVYKSPVVSGDTSPR-YVIQVSGGGPVHKINDK-a10-b13	WT_Tau	reverse_WT_Tau	intra-protein xl	395	144	251	4162.15	1041.54	4	2.6	1	6.41
DNIKHVPGGGSVQIVYKPVDLSK-KIETHKLTFR-a4-b6	WT_Tau	WT_Tau	intra-protein xl	298	375	77	3859.12	965.788	4	-4.3	1	6.38
DRVQSKIGSLDNITHVPGGGNK-K6-K22	WT_Tau	-	intralink	353	369	16	2429.27	810.763	3	-0.2	1	6.35
ESKVEVQGGGPK-AKKDDSGTGDK-a3-b3	reverse_WT_Tau	reverse_WT_Tau	intra-protein xl	102	302	200	2472.23	825.084	3	-1.9	1	6.33
GAAPPGQKGQANATRIPAK-GGGPQHKLNETSGIKSK-a8-b15	WT_Tau	reverse_WT_Tau	intra-protein xl	163	183	20	3706.97	927.752	4	-3.1	2	6.3
ESKVEVQGGGPKHHINGLSGCK-K3-K12	reverse_WT_Tau	-	intralink	102	111	9	2455.23	614.814	4	-0.5	1	6.28
ESKVEVQGGGPK-DGTGSDDKKAK-a3-b8	reverse_WT_Tau	WT_Tau	intra-protein xl	102	140	38	2472.23	825.084	3	-1.9	1	6.15
KDQGGYTXHQDQEGDTDAGLKESPLQTPTEDGSEEPGSETSDAK-KPERTPPTPLSPTRSR-a21-b1	WT_Tau	reverse_WT_Tau	intra-protein xl	44	218	174	6638.05	1328.62	5	-3.3	2	6.07
VTSKCGSLGNIHHKPGGGQVEVK-K14-K23	WT_Tau	-	intralink	331	340	9	2526.3	632.583	4	0.2	2	6.02
STVKSLDVPKYVIQVSGGGPVHK-K4-156	reverse_WT_Tau	-	monolink	125	n/a	-	2550.41	638.609	4	0.2	1	5.93
YVIQVSGGGPVHKINDKSGCK-STVKSLDVPK-a17-b4	reverse_WT_Tau	reverse_WT_Tau	intra-protein xl	148	125	23	3452.84	1151.96	3	3.4	1	5.92
DNIKHVPGGGSVQIVYKPVDLSK-LNETSGIKSK-a4-b8	WT_Tau	reverse_WT_Tau	intra-protein xl	298	183	115	3662.99	733.605	5	-0.4	1	5.91
ENAKAKTDHGAEIVYK-FTLKHTEIKK-a6-b9	WT_Tau	reverse_WT_Tau	intra-protein xl	385	72	313	3154.7	1052.58	3	-0.6	1	5.89
SKASSPSKPPTRVVAVK-XVSKSKDGTGSDDK-a8-b6	reverse_WT_Tau	WT_Tau	intra-protein xl	208	132	76	3345.73	1116.25	3	-4.3	1	5.88
STVKSLDVPKYVIQVSGGGPVHK-ESKVEVQGGGPK-a4-b3	reverse_WT_Tau	reverse_WT_Tau	intra-protein xl	125	102	23	3746.01	750.21	5	-4.2	1	5.87
YVIEAGHDTKAK-DKFDLKESK-a10-b2	reverse_WT_Tau	reverse_WT_Tau	intra-protein xl	57	95	38	2577.32	860.115	3	-4.7	1	5.78
ESKVEVQGGGPKHHINGLSGCK-K3-K22	reverse_WT_Tau	-	intralink	102	121	19	2455.22	819.415	3	-2.2	3	5.64
TANAQGKQGPPAAGRPTAIK-TPPAPKTPPSSGEPPKSGDR-a7-b6	reverse_WT_Tau	WT_Tau	intra-protein xl	279	180	99	4073.12	1019.29	4	-3.4	2	5.62
VNKLDPMPVPATQLR-DGTGSDDKK-a3-b8	reverse_WT_Tau	WT_Tau	intra-protein xl	188	140	48	2737.4	913.473	3	0.1	2	5.56
SPSSAKSRLQTAPVPXPDLK-KIETHKLTFR-a6-b1	WT_Tau	WT_Tau	intra-protein xl	240	370	130	3534.91	884.735	4	-3.8	2	5.54
KDQGGYTMHQDQEGDTDAGLKESPLQTPTEDGSEEPGSETSDAK-GAAPPGQKGQANATRIPAK-a21-b8	WT_Tau	WT_Tau	intra-protein xl	44	163	119	6635.06	1106.85	6	-2.8	3	5.54
YVIQVSGGGPVHKINDK-STVKSLDVPK-a13-b4	reverse_WT_Tau	reverse_WT_Tau	intra-protein xl	144	125	19	3020.65	756.171	4	-1.2	2	5.52
VQSKIGSLDNITHVPGGGNK-VNKLDPXPVPATQLR-a4-b3	WT_Tau	reverse_WT_Tau	intra-protein xl	353	188	165	3852.06	964.022	4	-0.1	1	5.51
SPSSAKSRLQTAPVPMPDLK-K6-K20	WT_Tau	-	intralink	240	254	14	2247.18	750.069	3	-3.9	4	5.5
NGGGPVHTINDLSGIKSQVRDK-NVKSKIGSTENLK-a16-b5	reverse_WT_Tau	WT_Tau	intra-protein xl	89	259	170	3846.08	962.527	4	4.3	2	5.49
TANAQGKQGPPAAGRPTAIKTK-KLDLSNVQSKCGSK-a7-b1	reverse_WT_Tau	WT_Tau	intra-protein xl	279	281	2	3863.05	1288.69	3	-4	4	5.46
DNIKHVPGGGSVQIVYKPVDLSKVTSK-DGSKPPEGSSPPTKPAPPTK-a23-b14	WT_Tau	reverse_WT_Tau	intra-protein xl	317	262	55	4976.64	1245.17	4	-2.8	1	5.42
IPAKTPPAPKTPPSSGEPPK-K4-K20	WT_Tau	-	intralink	174	190	16	2134.18	712.401	3	5	4	5.4
SPSSAKSRLQTAPVPMPDLK-ESKVEVQGGGPK-a6-b3	WT_Tau	reverse_WT_Tau	intra-protein xl	240	102	138	3460.82	1154.61	3	-2.2	1	5.39
DGSKPPEGSSPPTKPAPPTK-HVPGGGSVQIVYKPVDLSK-a14-b13	reverse_WT_Tau	WT_Tau	intra-protein xl	262	311	49	4091.14	1023.79	4	-3.7	1	5.38
YVIQVSGGGPVHKINDK-K13-156	reverse_WT_Tau	-	monolink	144	n/a	-	1966.05	656.358	3	-1.3	1	5.36
NGGGPVHTINDLSGIKSQVR-DKFDLKESK-a16-b2	reverse_WT_Tau	reverse_WT_Tau	intra-protein xl	89	95	6	3294.72	1099.25	3	-0.9	1	5.35
LDPXPVPATQLRSKASSPSKPPTR-SQVNSLDLKK-a14-b9	reverse_WT_Tau	reverse_WT_Tau	intra-protein xl	202	161	41	3845.07	962.274	4	-1.9	1	5.29
DQGGYTXHQDQEGDTDAGLKESPLQTPTEDGSEEPGSETSDAK-SKVNKLDPXPVPATQLR-a20-b5	WT_Tau	reverse_WT_Tau	intra-protein xl	44	188	144	6600.05	1321.02	5	4.9	3	5.28
LQTAPVPXPDLKNVKSK-LDLSNVQSKCGSK-a15-b9	WT_Tau	WT_Tau	intra-protein xl	257	290	33	3453.82	1152.28	3	0.1	1	5.25
VNKLDPMPVPATQLRSK-SQVNSLDLKK-a3-b9	reverse_WT_Tau	reverse_WT_Tau	intra-protein xl	188	161	27	3161.74	791.443	4	-2	2	5.22
KDQGGYTXHQDQEGDTDAGLKESPLQTPTEDGSEEPGSETSDAK-KPERTPPTPLSPTRSR-a1-b1	WT_Tau	reverse_WT_Tau	intra-protein xl	24	218	194	6638.05	1328.62	5	-3.3	1	5.21
VQSKIGSLDNITHVPGGGNKK-K21-155	WT_Tau	-	monolink	370	n/a	-	2303.26	768.76	3	-1.9	1	5.2
SPSSAKSRLQTAPVPMPDLK-VNKLDPXPVPATQLR-a6-b3	WT_Tau	reverse_WT_Tau	intra-protein xl	240	188	52	3941.1	986.282	4	-3.4	2	5.16
NGGGPVHTINDLSGIKSQVR-TKGDAGKAK-a16-b7	reverse_WT_Tau	reverse_WT_Tau	intra-protein xl	89	299	210	3060.62	1021.21	3	-4.3	1	5.15
LQTAPVPMPDLKNVK-SPSSAKSR-a12-b6	WT_Tau	WT_Tau	intra-protein xl	254	240	14	2606.41	869.813	3	1.5	1	5.15
STVKSLDVPKYVIQVSGGGPVHK-K4-K23	reverse_WT_Tau	-	intralink	125	144	19	2532.39	845.137	3	-2.7	1	5.13
ESKVEVQGGGPK-AKKDDSGTGDK-a3-b2	reverse_WT_Tau	reverse_WT_Tau	intra-protein xl	102	301	199	2472.22	825.082	3	-4.8	1	5.11
INDKSGCKSQVNSLDLK-KDDSGTGDKSK-a4-b9	reverse_WT_Tau	reverse_WT_Tau	intra-protein xl	148	310	162	3179.55	1060.86	3	-3.2	1	5.08
KNGGGPVHTINDLSGIKSQVR-SKVNKLDPMPVPATQLR-a17-b2	reverse_WT_Tau	reverse_WT_Tau	intra-protein xl	89	185	96	4207.3	1403.44	3	2.3	2	5.07
DGSKPPEGSSPPTKPAPPTK-K4-156	reverse_WT_Tau	-	monolink	252	n/a	-	2130.08	711.036	3	-0.6	4	5.04
KNGGGPVHTINDLSGIK-LQTAPVPXPDLKNVKSK-a1-b15	reverse_WT_Tau	WT_Tau	intra-protein xl	73	257	184	3725.02	746.012	5	0.6	1	4.95
KNGGGPVHTINDLSGIKSQVR-SGCKSQVNSLDLKK-a17-b13	reverse_WT_Tau	reverse_WT_Tau	intra-protein xl	89	161	72	3877.03	970.266	4	-4.1	1	4.95
VTSKCGSLGNIHHKPGGGQVEVK-SPSSAKSR-a4-b6	WT_Tau	WT_Tau	intra-protein xl	321	240	81	3344.73	1115.92	3	0	1	4.88
YVIQVSGGGPVHKINDK-KIETHKLTFR-a13-b1	reverse_WT_Tau	WT_Tau	intra-protein xl	144	370	226	3219.76	1074.26	3	-4.5	2	4.86
VTSKCGSLGNIHHKPGGGQVEVKSEK-K14-155	WT_Tau	-	monolink	331	n/a	-	2887.49	963.505	3	-2.2	1	4.85
DGSKPPEGSSPPTKPAPPTKAPIRTANAQGK-YVIEAGHDTKAK-a14-b10	reverse_WT_Tau	reverse_WT_Tau	intra-protein xl	262	57	205	4550.39	911.086	5	3.6	1	4.85
SLDVPKYVIQVSGGGPVHKINDK-K19-156	reverse_WT_Tau	-	monolink	144	n/a	-	2605.41	652.361	4	0.7	2	4.81
YVIQVSGGGPVHKINDKSGCK-SPSSAKSRLQTAPVPMPDLK-a17-b6	reverse_WT_Tau	WT_Tau	intra-protein xl	148	240	92	4489.36	1123.35	4	3.7	1	4.79
VQSKIGSLDNITHVPGGGNKK-QGPPAAGRPTAIKTKGDAGK-a4-b15	WT_Tau	reverse_WT_Tau	intra-protein xl	353	294	59	4206.29	1403.11	3	0.9	2	4.77
FDLKESKVEVQGGGPK-K4-K16	reverse_WT_Tau	-	intralink	99	111	12	1854.97	619.331	3	-1.4	1	4.77
TPPAPKTPPSSGEPPKSGDR-TKIATPRGAAPPGQK-a16-b2	WT_Tau	WT_Tau	intra-protein xl	190	150	40	3631.93	1211.65	3	0	2	4.76
DGSKPPEGSSPPTKPAPPTK-K4-155	reverse_WT_Tau	-	monolink	252	n/a	-	2129.1	710.709	3	0.6	2	4.74
SPSSAKSRLQTAPVPXPDLK-AKANERFTLK-a6-b2	WT_Tau	reverse_WT_Tau	intra-protein xl	240	59	181	3439.84	860.969	4	-1.8	1	4.72
SRLQTAPVPXPDLKNVK-IETHKLTFRENAK-a14-b5	WT_Tau	WT_Tau	intra-protein xl	254	375	121	3632.99	1212	3	4.4	1	4.72
KPERTPPTPLSPTRSR-HQPGGGKVQIINK-a1-b7	reverse_WT_Tau	WT_Tau	intra-protein xl	218	274	56	3331.85	833.969	4	-0.6	1	4.71
DGSKPPEGSSPPTKPAPPTK-KPERTPPTPLSPTRSR-a4-b1	reverse_WT_Tau	reverse_WT_Tau	intra-protein xl	252	218	34	3931.08	1311.37	3	0	1	4.71
YVIQVSGGGPVHKINDK-ESKVEVQGGGPK-a13-b3	reverse_WT_Tau	reverse_WT_Tau	intra-protein xl	144	102	42	3161.68	633.343	5	1	1	4.66
VTSKCGSLGNIHHKPGGGQVEVKSEK-K4-K26	WT_Tau	-	intralink	321	343	22	2870.47	957.831	3	-0.1	2	4.51
ASSPSKPPTRVVAVK-SKSVXR-a6-b2	reverse_WT_Tau	reverse_WT_Tau	intra-protein xl	208	312	104	2383.32	795.448	3	-2	2	4.47
GGGPQHKLNETSGIKSK-SKIGSTENLK-a7-b2	reverse_WT_Tau	WT_Tau	intra-protein xl	175	259	84	2950.59	738.654	4	4.4	2	4.46
YVIQVSGGGPVHKINDK-K13-155	reverse_WT_Tau	-	monolink	144	n/a	-	1965.07	656.031	3	-0.7	1	4.45
ADSTESGPEESGDETPTQLPSEKLGADTDGEQDQHMTYGGQDKR-KPERTPPTPLSPTRSR-a43-b1	reverse_WT_Tau	reverse_WT_Tau	intra-protein xl	418	218	200	6650.05	1331.02	5	-5	4	4.44
YVIQVSGGGPVHKINDK-K13-K17	reverse_WT_Tau	-	intralink	144	148	4	1948.04	650.353	3	-3	1	4.43
VTSKCGSLGNIHHKPGGGQVEVKSEK-K26-155	WT_Tau	-	monolink	343	n/a	-	2887.49	963.505	3	-2.2	4	4.42
HVPGGGSVQIVYKPVDLSKVTSKCGSLGNIHHKPGGGQVEVK-K19-156	WT_Tau	-	monolink	317	n/a	-	4505.37	1127.35	4	-2.4	1	4.36
LDLSNVQSKCGSK-VVAVKKPER-a9-b5	WT_Tau	reverse_WT_Tau	intra-protein xl	290	217	73	2597.43	866.816	3	1.5	1	4.27
AKKDDSGTGDK-AKANERFTLK-a2-b2	reverse_WT_Tau	reverse_WT_Tau	intra-protein xl	301	59	242	2435.28	812.766	3	4.2	1	4.27
TANAQGKQGPPAAGRPTAIK-K7-K20	reverse_WT_Tau	-	intralink	279	292	13	2071.12	691.383	3	3.8	1	4.26
VTSKCGSLGNIHHKPGGGQVEVKSEK-K4-156	WT_Tau	-	monolink	321	n/a	-	2888.48	963.834	3	-0.9	1	4.22
QEFEVMEDHAGTYGLGDRKDQGGYTMHQDQEGDTDAGLK-VQSKIGSLDNITHVPGGGNKK-a19-b20	WT_Tau	WT_Tau	intra-protein xl	24	369	345	6614.07	1103.35	6	-4.7	4	4.21
LQTAPVPMPDLKNVK-AKKDDSGTGDK-a12-b2	WT_Tau	reverse_WT_Tau	intra-protein xl	254	301	47	2908.51	970.511	3	-4	2	4.21
NVKSKIGSTENLK-SQVNSLDLKK-a5-b9	WT_Tau	reverse_WT_Tau	intra-protein xl	259	161	98	2685.48	896.167	3	-4.7	1	4.17
ASSPSKPPTRVVAVK-IETHKLTFRENAK-a6-b5	reverse_WT_Tau	WT_Tau	intra-protein xl	208	375	167	3246.8	812.707	4	-3.8	1	4.17
LQTAPVPMPDLKNVKSK-INDKSGCK-a15-b4	WT_Tau	reverse_WT_Tau	intra-protein xl	257	148	109	2923.54	731.893	4	-4.1	1	4.15
KNGGGPVHTINDLSGIKSQVR-SRLQTAPVPMPDLKNVK-a17-b14	reverse_WT_Tau	WT_Tau	intra-protein xl	89	254	165	4207.31	1403.44	3	3.5	2	4.14
KNGGGPVHTINDLSGIK-K1-155	reverse_WT_Tau	-	monolink	73	n/a	-	1861	621.342	3	-2.5	2	4.09
SLDVPKYVIQVSGGGPVHKINDK-K23-156	reverse_WT_Tau	-	monolink	148	n/a	-	2605.41	869.479	3	0.3	2	4.09
SPSSAKSRLQTAPVPMPDLK-SRLQTAPVPXPDLKNVK-a6-b14	WT_Tau	WT_Tau	intra-protein xl	240	254	14	4156.23	1386.42	3	-2.1	1	4.08
KPERTPPTPLSPTR-ESKVEVQGGGPK-a1-b3	reverse_WT_Tau	reverse_WT_Tau	intra-protein xl	218	102	116	2927.57	976.865	3	0.2	1	4.08
SPSSAKSRLQTAPVPXPDLK-SKIGSTENLK-a6-b2	WT_Tau	WT_Tau	intra-protein xl	240	259	19	3338.77	835.7	4	-1.9	1	4.02
DDSGTGDKSKSVMR-AKANER-a8-b2	reverse_WT_Tau	reverse_WT_Tau	intra-protein xl	310	59	251	2307.12	770.048	3	3.8	1	4.01
QEFEVMEDHAGTYGLGDRKDQGGYTXHQDQEGDTDAGLK-HHINGLSGCKSTVKSLDVPK-a19-b10	WT_Tau	reverse_WT_Tau	intra-protein xl	24	121	97	6658.06	1332.62	5	-1.8	1	4
VQSKIGSLDNITHVPGGGNK-VQSKIGSLDNITHVPGGGNK-a4-b4	WT_Tau	WT_Tau	intra-protein xl	353	353	0	4178.21	1045.56	4	-0.7	2	3.97
APIRTANAQGKQGPPAAGRPTAIK-YVIQVSGGGPVHKINDK-a11-b13	reverse_WT_Tau	reverse_WT_Tau	intra-protein xl	279	144	135	4318.38	720.737	6	2.6	3	3.9
TKIATPRGAAPPGQK-SGCKSQVNSLDLKK-a2-b4	WT_Tau	reverse_WT_Tau	intra-protein xl	150	152	2	3192.73	1065.25	3	0	1	3.87
IGSLDNITHVPGGGNKK-LQTAPVPXPDLKNVKSK-a16-b15	WT_Tau	WT_Tau	intra-protein xl	369	257	112	3725.04	1242.69	3	5	1	3.79
GQANATRIPAKTPPAPK-IETHKLTFR-a11-b5	WT_Tau	WT_Tau	intra-protein xl	174	375	201	2998.69	600.745	5	5	1	3.75
DRVQSKIGSLDNITHVPGGGNK-NVKSKIGSTENLK-a6-b5	WT_Tau	WT_Tau	intra-protein xl	353	259	94	3846.05	1283.03	3	-2.2	4	3.75
YVIQVSGGGPVHKINDK-SKIGSTENLK-a13-b2	reverse_WT_Tau	WT_Tau	intra-protein xl	144	259	115	3023.64	1008.89	3	4.6	1	3.65
FDLKESKVEVQGGGPK-LDLSNVQSKCGSK-a4-b9	reverse_WT_Tau	WT_Tau	intra-protein xl	99	290	191	3289.67	823.425	4	-4.9	1	3.64
TANAQGKQGPPAAGRPTAIKTK-KPERTPPTPLSPTRSR-a20-b1	reverse_WT_Tau	reverse_WT_Tau	intra-protein xl	292	218	74	4119.26	1030.82	4	-1.4	1	3.54
VTSKCGSLGNIHHKPGGGQVEVKSEK-NVKSKIGSTENLK-a4-b3	WT_Tau	WT_Tau	intra-protein xl	321	257	64	4287.28	858.465	5	4.4	1	3.47
LQTAPVPXPDLKNVK-KPERTPPTPLSPTR-a12-b1	WT_Tau	reverse_WT_Tau	intra-protein xl	254	218	36	3379.85	1127.62	3	-2.4	2	3.46
YVIEAGHDTKAK-AKANERFTLK-a10-b2	reverse_WT_Tau	reverse_WT_Tau	intra-protein xl	57	59	2	2645.42	882.815	3	1.2	1	3.38
TANAQGKQGPPAAGRPTAIKTK-KLDLSNVQSKCGSK-a20-b10	reverse_WT_Tau	WT_Tau	intra-protein xl	292	290	2	3863.05	1288.69	3	-4	2	3.29
VNKLDPXPVPATQLR-TPSLPTPPTREPKK-a3-b13	reverse_WT_Tau	WT_Tau	intra-protein xl	188	224	36	3379.84	1127.62	3	-3.3	1	3.28
QEFEVXEDHAGTYGLGDRKDQGGYTMHQDQEGDTDAGLK-VQSKIGSLDNITHVPGGGNKK-a19-b20	WT_Tau	WT_Tau	intra-protein xl	24	369	345	6630.08	1327.02	5	-1.8	2	3.26
TANAQGKQGPPAAGRPTAIK-KIETHKLTFR-a7-b6	reverse_WT_Tau	WT_Tau	intra-protein xl	279	375	96	3342.84	1115.29	3	-5	1	3.25
NGGGPVHTINDLSGIKSQVR-LQTAPVPXPDLKNVK-a16-b12	reverse_WT_Tau	WT_Tau	intra-protein xl	89	254	165	3852.06	964.022	4	-0.1	1	3.23
NGGGPVHTINDLSGIKSQVRDK-NVKSKIGSTENLK-a16-b3	reverse_WT_Tau	WT_Tau	intra-protein xl	89	257	168	3846.07	962.525	4	2.4	4	3.19
NIIQVKGGGPQHKLNETSGIK-K6-K21	reverse_WT_Tau	-	intralink	168	183	15	2355.3	786.106	3	1.8	1	3.16
TDHGAEIVYKSPVVSGDTSPR-AKANERFTLK-a10-b2	WT_Tau	reverse_WT_Tau	intra-protein xl	395	59	336	3528.83	706.775	5	3.6	3	3.13
TKIATPRGAAPPGQK-KLDLSNVQSKCGSK-a2-b1	WT_Tau	WT_Tau	intra-protein xl	150	281	131	3192.74	1065.25	3	3.4	1	3.08
SQVNSLDLKK-K9-K10	reverse_WT_Tau	-	intralink	161	162	1	1268.7	423.906	3	-1.6	1	3.01
VQSKIGSLDNITHVPGGGNKK-IPAKTPPAPKTPPSSGEPPK-a20-b4	WT_Tau	WT_Tau	intra-protein xl	369	174	195	4282.33	1428.45	3	0.4	1	2.96
SRSGPTGPSGPSSYGSRDGSKPPEGSSPPTKPAPPTK-K37-155	reverse_WT_Tau	-	monolink	268	n/a	-	3746.85	1249.96	3	-0.1	1	2.96
NVKSKIGSTENLK-SKIGSTENLK-a5-b2	WT_Tau	WT_Tau	intra-protein xl	259	259	0	2630.44	877.821	3	-3.4	1	2.82
AKTDHGAEIVYKSPVVSGDTSPR-IPAKTPPAPKTPPSSGEPPK-a2-b4	WT_Tau	WT_Tau	intra-protein xl	385	174	211	4547.37	758.903	6	-4.4	1	2.81
QEFEVXEDHAGTYGLGDRKDQGGYTMHQDQEGDTDAGLK-VQSKIGSLDNITHVPGGGNKK-a19-b4	WT_Tau	WT_Tau	intra-protein xl	24	353	329	6630.08	1327.02	5	-2.1	1	2.72
IGSLDNITHVPGGGNKK-KPERTPPTPLSPTRSR-a16-b1	WT_Tau	reverse_WT_Tau	intra-protein xl	369	218	151	3662.99	733.605	5	0.3	1	2.68
IATPRGAAPPGQKGQANATR-TKIATPRGAAPPGQK-a13-b2	WT_Tau	WT_Tau	intra-protein xl	163	150	13	3590.97	898.749	4	-2.7	1	2.66
KNGGGPVHTINDLSGIK-SEKLDFK-a1-b3	reverse_WT_Tau	WT_Tau	intra-protein xl	73	343	270	2709.43	904.152	3	-0.7	1	2.59
IGSTENLKHQPGGGKVQIINK-K15-155	WT_Tau	-	monolink	274	n/a	-	2372.32	791.783	3	2.6	1	2.58
INDKSGCKSQVNSLDLK-TPPSSGEPPKSGDR-a4-b10	reverse_WT_Tau	WT_Tau	intra-protein xl	148	190	42	3453.72	864.437	4	3.6	1	2.54
LGADTDGEQDQHXTYGGQDKRDGLGYTGAHDEMVEFEQRPEAM-VNKLDPXPVPATQLR-a20-b3	reverse_WT_Tau	reverse_WT_Tau	intra-protein xl	418	188	230	6632.05	1327.42	5	3.5	1	2.5
HTEIKKNGGGPVHTINDLSGIK-VAVVRTPPKSPSSAK-a6-b9	reverse_WT_Tau	WT_Tau	intra-protein xl	73	234	161	3975.21	994.81	4	4.4	1	2.41
TPPAPKTPPSSGEPPKSGDR-TKIATPRGAAPPGQK-a6-b2	WT_Tau	WT_Tau	intra-protein xl	180	150	30	3631.93	1211.65	3	-0.3	2	2.41
YVIQVSGGGPVHKINDKSGCK-VNKLDPMPVPATQLR-a17-b3	reverse_WT_Tau	reverse_WT_Tau	intra-protein xl	148	188	40	4058.16	1353.73	3	3	1	2.4
IGSLDNITHVPGGGNKK-NVKSKIGSTENLK-a16-b5	WT_Tau	WT_Tau	intra-protein xl	369	259	110	3260.78	1087.93	3	1.3	1	2.39
DGSKPPEGSSPPTKPAPPTK-FTLKHTEIKK-a14-b9	reverse_WT_Tau	reverse_WT_Tau	intra-protein xl	262	72	190	3355.79	1119.61	3	-2.6	1	2.23
LQTAPVPXPDLKNVKSK-SKASSPSKPPTRVVAVK-a15-b2	WT_Tau	reverse_WT_Tau	intra-protein xl	257	202	55	3757.1	1253.37	3	-4.9	1	1.85
KDQGGYTMHQDQEGDTDAGLK-KNIIQVKGGGPQHK-a1-b1	WT_Tau	reverse_WT_Tau	intra-protein xl	24	162	138	3933.94	1312.32	3	3.4	1	1.68
DGSKPPEGSSPPTKPAPPTK-TPPAPKTPPSSGEPPKSGDR-a4-b6	reverse_WT_Tau	WT_Tau	intra-protein xl	252	180	72	4114.1	1029.53	4	3	1	1.68
IGSLDNITHVPGGGNKKIETHK-IGSLDNITHVPGGGNKK-a17-b16	WT_Tau	WT_Tau	intra-protein xl	370	369	1	4158.22	1387.08	3	1.1	1	1.56
DGSKPPEGSSPPTKPAPPTK-IPAKTPPAPKTPPSSGEPPK-a4-b4	reverse_WT_Tau	WT_Tau	intra-protein xl	252	174	78	4108.19	1028.06	4	4.9	1	1.55
IGSLDNITHVPGGGNKK-NVKSKIGSTENLK-a16-b3	WT_Tau	WT_Tau	intra-protein xl	369	257	112	3260.78	1087.93	3	1.4	1	1.35
DQGGYTXHQDQEGDTDAGLKESPLQTPTEDGSEEPGSETSDAK-IATPRGAAPPGQKGQANATR-a20-b13	WT_Tau	WT_Tau	intra-protein xl	44	163	119	6652.04	1331.42	5	1.9	1	1.29
KNGGGPVHTINDLSGIK-FTLKHTEIKK-a1-b4	reverse_WT_Tau	reverse_WT_Tau	intra-protein xl	73	67	6	3087.71	1030.24	3	-0.2	1	1.18
GGGPQHKLNETSGIKSK-FDLKESKVEVQGGGPK-a7-b4	reverse_WT_Tau	reverse_WT_Tau	intra-protein xl	175	99	76	3591.91	1198.31	3	4.1	1	1.16
YVIEAGHDTKAKANER-K10-K12	reverse_WT_Tau	-	intralink	57	59	2	1938.99	647.337	3	3.5	1	1.15
CGSLGNIHHKPGGGQVEVKSEK-K10-155	WT_Tau	-	monolink	331	n/a	-	2472.26	825.093	3	0.1	1	1.13
AKTDHGAEIVYKSPVVSGDTSPR-K2-156	WT_Tau	-	monolink	385	n/a	-	2569.29	857.439	3	-3.2	2	1.12
YVIQVSGGGPVHKINDK-QGPPAAGRPTAIKTK-a13-b13	reverse_WT_Tau	reverse_WT_Tau	intra-protein xl	144	292	148	3439.9	1147.64	3	2.4	1	1.11
KNIIQVKGGGPQHK-MVSKSKDGTGSDDK-a1-b4	reverse_WT_Tau	WT_Tau	intra-protein xl	162	130	32	3094.61	1032.55	3	2.2	1	0.93
KNIIQVKGGGPQHK-MVSKSKDGTGSDDK-a7-b4	reverse_WT_Tau	WT_Tau	intra-protein xl	168	130	38	3094.61	1032.55	3	2.2	1	0.84
GAAPPGQKGQANATRIPAK-KNGGGPVHTINDLSGIK-a8-b1	WT_Tau	reverse_WT_Tau	intra-protein xl	163	73	90	3675.97	1226.33	3	-2.9	1	0.77
TANAQGKQGPPAAGRPTAIK-VQSKIGSLDNITHVPGGGNK-a7-b4	reverse_WT_Tau	WT_Tau	intra-protein xl	279	353	74	4091.2	1364.74	3	3.9	1	0.61
LDPMPVPATQLRSKASSPSKPPTR-TDHGAEIVYKSPVVSGDTSPR-a14-b10	reverse_WT_Tau	WT_Tau	intra-protein xl	202	395	193	4912.53	983.513	5	-2.4	2	0.61
ESKVEVQGGGPKHHINGLSGCK-K12-156	reverse_WT_Tau	-	monolink	111	n/a	-	2473.24	825.421	3	0.7	1	0.56
QEFEVMEDHAGTYGLGDRKDQGGYTXHQDQEGDTDAGLK-VQSKIGSLDNITHVPGGGNKK-a19-b20	WT_Tau	WT_Tau	intra-protein xl	24	369	345	6630.07	1327.02	5	-3.4	1	0.52
QGPPAAGRPTAIKTKGDAGK-K13-K20	reverse_WT_Tau	-	intralink	292	299	7	2058.12	687.048	3	-0.1	1	0.08

## Sheet: Fig4g_SF1
Id	Protein1	Protein2	XLType	AbsPos1	AbsPos2	deltaAA	Mr	Mz	z	Error_rel[ppm]	nseen	ld-Score
HQPGGGKVQIINK-K7-156	s320f_Tau	-	monolink	274	n/a	-	1530.85	511.291	3	-1	4	54.66
HQPGGGKVQIINK-K7-155	s320f_Tau	-	monolink	274	n/a	-	1529.87	510.963	3	-2.3	12	52.45
VQIINKKLDLSNVQSK-K6-K7	s320f_Tau	-	intralink	280	281	1	1964.13	655.717	3	-1.1	18	50.17
VQSKIGSLDNITHVPGGGNK-SEKLDFKDR-a4-b3	s320f_Tau	s320f_Tau	intra-protein xl	353	343	10	3294.72	550.127	6	-1.6	6	49.36
DNIKHVPGGGSVQIVYKPVDLSK-K4-155	s320f_Tau	-	monolink	298	n/a	-	2604.42	869.149	3	-2.5	4	47.79
KLDLSNVQSKCGSK-K10-155	s320f_Tau	-	monolink	290	n/a	-	1717.9	573.642	3	-2	1	47.76
HVPGGGSVQIVYKPVDLSK-K13-156	s320f_Tau	-	monolink	311	n/a	-	2135.16	712.729	3	-0.3	153	44.08
CGSLGNIHHKPGGGQVEVKSEK-K19-155	s320f_Tau	-	monolink	340	n/a	-	2472.25	619.07	4	-2.3	2	43.92
IGSTENLKHQPGGGK-VQIINKK-a8-b6	s320f_Tau	s320f_Tau	intra-protein xl	267	280	13	2501.39	834.806	3	-1	4	43.78
KLDLSNVQSKCGSK-SKIGSTENLK-a10-b2	s320f_Tau	s320f_Tau	intra-protein xl	290	259	31	2776.46	926.495	3	-1.2	1	43.68
LDLSNVQSKCGSK-K9-155	s320f_Tau	-	monolink	290	n/a	-	1589.81	530.943	3	-2.8	1	43.59
HVPGGGSVQIVYKPVDLSKVTFK-K19-155	s320f_Tau	-	monolink	317	n/a	-	2609.46	653.372	4	-1.4	5	43.32
CGSLGNIHHKPGGGQVEVK-K10-155	s320f_Tau	-	monolink	331	n/a	-	2128.08	533.029	4	-1.3	23	43.14
VQIINKK-LDFKDR-a6-b4	s320f_Tau	s320f_Tau	intra-protein xl	280	347	67	1772.02	444.012	4	-1.5	2	42.36
HQPGGGKVQIINK-KLDLSNVQSK-a7-b1	s320f_Tau	s320f_Tau	intra-protein xl	274	281	7	2643.47	529.701	5	-1.1	1	42.21
HVPGGGSVQIVYKPVDLSKVTFK-K13-K19	s320f_Tau	-	intralink	311	317	6	2592.43	649.114	4	-2.1	125	42.03
IGSLDNITHVPGGGNKK-K16-156	s320f_Tau	-	monolink	369	n/a	-	1861.99	621.671	3	0.4	203	41.75
IGSTENLKHQPGGGK-KLDLSNVQSK-a8-b1	s320f_Tau	s320f_Tau	intra-protein xl	267	281	14	2790.48	931.169	3	-1.2	10	41.72
LDLSNVQSKCGSKDNIK-K13-156	s320f_Tau	-	monolink	294	n/a	-	2061.04	688.021	3	-1.1	1	41.59
KLDLSNVQSKCGSK-K10-156	s320f_Tau	-	monolink	290	n/a	-	1718.89	573.97	3	0.1	4	41.53
CGSLGNIHHKPGGGQVEVK-K10-156	s320f_Tau	-	monolink	331	n/a	-	2129.07	710.697	3	-1.1	17	41.09
IGSLDNITHVPGGGNKK-K16-155	s320f_Tau	-	monolink	369	n/a	-	1861	621.342	3	-2	357	40.88
NVKSKIGSTENLK-K5-156	s320f_Tau	-	monolink	259	n/a	-	1572.87	525.298	3	-1.2	2	40.68
HVPGGGSVQIVYKPVDLSK-K13-155	s320f_Tau	-	monolink	311	n/a	-	2134.18	712.399	3	-2.6	159	40.11
CGSKDNIK-VQIINKK-a4-b6	s320f_Tau	s320f_Tau	intra-protein xl	294	280	14	1900.04	476.018	4	-1.4	2	40.04
KLDLSNVQSKCGSK-K10-K14	s320f_Tau	-	intralink	290	294	4	1700.87	567.966	3	-1.9	4	40.01
CGSKDNIKHVPGGGSVQIVYKPVDLSK-K4-K8	s320f_Tau	-	intralink	294	298	4	3019.58	1007.53	3	-0.9	5	39.88
KIETHKLTFR-K6-155	s320f_Tau	-	monolink	375	n/a	-	1426.83	476.616	3	-3.8	1	39.85
IGSLDNITHVPGGGNKK-K17-155	s320f_Tau	-	monolink	370	n/a	-	1861	621.342	3	-2	100	39.74
VQSKIGSLDNITHVPGGGNK-K4-156	s320f_Tau	-	monolink	353	n/a	-	2176.15	726.39	3	-1	55	39.46
IGSLDNITHVPGGGNKK-IETHKLTFR-a16-b5	s320f_Tau	s320f_Tau	intra-protein xl	369	375	6	2987.61	747.912	4	-1.5	1	39.38
HQPGGGKVQIINK-SKIGSTENLK-a7-b2	s320f_Tau	s320f_Tau	intra-protein xl	274	259	15	2588.42	518.693	5	-1.7	5	39.36
IETHKLTFR-K5-155	s320f_Tau	-	monolink	375	n/a	-	1298.73	433.919	3	-3.1	2	39.13
VQSKIGSLDNITHVPGGGNK-K4-155	s320f_Tau	-	monolink	353	n/a	-	2175.16	726.063	3	-0.9	105	39.02
KIETHK-LDFKDR-a1-b4	s320f_Tau	s320f_Tau	intra-protein xl	370	347	23	1684.91	562.646	3	-1.1	2	38.77
IGSLDNITHVPGGGNKK-K17-156	s320f_Tau	-	monolink	370	n/a	-	1861.99	621.673	3	2.5	49	38.73
VTFKCGSLGNIHHKPGGGQVEVK-K4-155	s320f_Tau	-	monolink	321	n/a	-	2603.36	651.848	4	-2	17	38.38
HQPGGGKVQIINKK-K7-155	s320f_Tau	-	monolink	274	n/a	-	1657.96	553.661	3	-2.5	1	38.19
CGSLGNIHHKPGGGQVEVKSEK-K19-156	s320f_Tau	-	monolink	340	n/a	-	2473.24	619.317	4	-1.4	15	38.16
KLDLSNVQSK-SEKLDFK-a1-b3	s320f_Tau	s320f_Tau	intra-protein xl	281	343	62	2134.15	534.546	4	-0.6	1	37.93
VQSKIGSLDNITHVPGGGNKK-K4-156	s320f_Tau	-	monolink	353	n/a	-	2304.24	577.068	4	-1.2	13	37.79
LDLSNVQSKCGSK-VQIINKK-a9-b6	s320f_Tau	s320f_Tau	intra-protein xl	290	280	10	2414.32	604.587	4	-1.4	1	37.76
VTFKCGSLGNIHHKPGGGQVEVK-KLDLSNVQSK-a4-b1	s320f_Tau	s320f_Tau	intra-protein xl	321	281	40	3716.96	744.4	5	-1.2	5	37.36
VQSKIGSLDNITHVPGGGNK-SEKLDFK-a4-b3	s320f_Tau	s320f_Tau	intra-protein xl	353	343	10	3023.59	605.725	5	-1.8	5	37.24
SEKLDFKDR-K3-156	s320f_Tau	-	monolink	343	n/a	-	1292.66	431.894	3	-2.4	4	37.22
VTFKCGSLGNIHHKPGGGQVEVK-K4-156	s320f_Tau	-	monolink	321	n/a	-	2604.35	652.095	4	0.5	29	37.1
VQSKIGSLDNITHVPGGGNK-LDFKDR-a4-b4	s320f_Tau	s320f_Tau	intra-protein xl	353	347	6	2950.55	591.117	5	-1.1	6	37.05
IGSLDNITHVPGGGNKKIETHK-K16-K17	s320f_Tau	-	intralink	369	370	1	2452.31	614.084	4	-0.3	21	36.9
HVPGGGSVQIVYKPVDLSK-VQIINKK-a13-b6	s320f_Tau	s320f_Tau	intra-protein xl	311	280	31	2958.69	740.68	4	-0.3	2	36.86
IGSTENLKHQPGGGK-KIETHK-a8-b1	s320f_Tau	s320f_Tau	intra-protein xl	267	370	103	2414.29	805.771	3	-1.4	2	36.71
CGSLGNIHHKPGGGQVEVK-SEKLDFKDR-a10-b3	s320f_Tau	s320f_Tau	intra-protein xl	331	343	12	3247.64	812.918	4	-0.4	4	36.49
KLDLSNVQSK-LDFKDR-a1-b4	s320f_Tau	s320f_Tau	intra-protein xl	281	347	66	2061.12	688.047	3	3.2	1	36.21
IGSTENLKHQPGGGK-K8-156	s320f_Tau	-	monolink	267	n/a	-	1677.87	560.296	3	-1.6	16	35.63
SEKLDFK-VQIINKK-a3-b6	s320f_Tau	s320f_Tau	intra-protein xl	343	280	63	1845.06	462.273	4	-1.3	1	35.02
IETHKLTFR-K5-156	s320f_Tau	-	monolink	375	n/a	-	1299.72	434.247	3	-1.7	1	34.99
IGSTENLKHQPGGGK-K8-155	s320f_Tau	-	monolink	267	n/a	-	1676.88	559.969	3	-2.3	14	34.42
HQPGGGKVQIINK-LDLSNVQSKCGSK-a7-b9	s320f_Tau	s320f_Tau	intra-protein xl	274	290	16	2947.55	590.518	5	-1.4	2	34.27
LDLSNVQSKCGSKDNIK-K13-155	s320f_Tau	-	monolink	294	n/a	-	2060.05	687.692	3	-2.7	1	34.22
VQSKIGSLDNITHVPGGGNKK-K4-155	s320f_Tau	-	monolink	353	n/a	-	2303.26	768.761	3	-1.1	6	34.16
IGSLDNITHVPGGGNKK-SEKLDFKDR-a16-b7	s320f_Tau	s320f_Tau	intra-protein xl	369	347	22	2980.56	746.148	4	-0.7	1	33.94
HVPGGGSVQIVYKPVDLSK-CGSKDNIK-a13-b4	s320f_Tau	s320f_Tau	intra-protein xl	311	294	17	3037.59	760.404	4	-1.6	1	33.9
IGSTENLKHQPGGGK-CGSKDNIK-a8-b4	s320f_Tau	s320f_Tau	intra-protein xl	267	294	27	2580.29	861.106	3	-1.1	3	33.79
IGSLDNITHVPGGGNKK-LDFKDR-a16-b4	s320f_Tau	s320f_Tau	intra-protein xl	369	347	22	2636.39	528.285	5	-1.8	2	33.76
DRVQSKIGSLDNITHVPGGGNK-K6-155	s320f_Tau	-	monolink	353	n/a	-	2446.29	612.58	4	-3	1	33.75
VQSKIGSLDNITHVPGGGNK-KIETHK-a4-b1	s320f_Tau	s320f_Tau	intra-protein xl	353	370	17	2912.57	971.864	3	-1.2	7	33.65
SKIGSTENLK-SEKLDFK-a2-b3	s320f_Tau	s320f_Tau	intra-protein xl	259	343	84	2079.11	694.044	3	-0.9	1	33.38
DNIKHVPGGGSVQIVYKPVDLSK-VQIINKK-a4-b6	s320f_Tau	s320f_Tau	intra-protein xl	298	280	18	3428.94	686.795	5	-1.2	2	33.35
VQSKIGSLDNITHVPGGGNKK-LDFKDR-a4-b4	s320f_Tau	s320f_Tau	intra-protein xl	353	347	6	3078.64	616.736	5	-1.2	2	33.19
IGSLDNITHVPGGGNKK-SEKLDFK-a16-b3	s320f_Tau	s320f_Tau	intra-protein xl	369	343	26	2709.43	542.894	5	-1.4	6	33.16
CGSLGNIHHKPGGGQVEVKSEKLDFK-K19-156	s320f_Tau	-	monolink	340	n/a	-	2976.53	993.183	3	4.7	5	33.02
DNIKHVPGGGSVQIVYKPVDLSK-KLDLSNVQSKCGSK-a4-b10	s320f_Tau	s320f_Tau	intra-protein xl	298	290	8	4150.21	1038.56	4	-0.9	2	32.99
KLDLSNVQSK-CGSKDNIK-a1-b4	s320f_Tau	s320f_Tau	intra-protein xl	281	294	13	2189.14	548.292	4	-0.7	2	32.99
CGSLGNIHHKPGGGQVEVKSEK-LDFKDR-a19-b4	s320f_Tau	s320f_Tau	intra-protein xl	340	347	7	3247.64	650.535	5	-1.1	1	32.95
CGSLGNIHHKPGGGQVEVK-SEKLDFK-a10-b3	s320f_Tau	s320f_Tau	intra-protein xl	331	343	12	2976.51	993.178	3	-0.9	2	32.92
LDLSNVQSKCGSK-KIETHK-a9-b1	s320f_Tau	s320f_Tau	intra-protein xl	290	370	80	2327.21	776.745	3	-1.2	1	32.84
IGSTENLKHQPGGGK-SEKLDFK-a8-b3	s320f_Tau	s320f_Tau	intra-protein xl	267	343	76	2525.31	632.336	4	-0.6	2	32.83
SEKLDFKDR-K3-155	s320f_Tau	-	monolink	343	n/a	-	1291.67	431.566	3	-3.6	4	32.81
VQIINKK-KIETHK-a6-b1	s320f_Tau	s320f_Tau	intra-protein xl	280	370	90	1734.04	434.517	4	-2	2	32.78
VQIINKK-VQIINKK-a6-b6	s320f_Tau	s320f_Tau	intra-protein xl	280	280	0	1821.14	456.293	4	-2.6	2	32.68
CGSLGNIHHKPGGGQVEVKSEKLDFK-K19-K22	s320f_Tau	-	intralink	340	343	3	2958.5	987.174	3	-1	4	32.62
CGSLGNIHHKPGGGQVEVKSEK-K22-156	s320f_Tau	-	monolink	343	n/a	-	2473.24	825.421	3	0.1	6	32.36
DNIKHVPGGGSVQIVYKPVDLSK-IGSTENLKHQPGGGK-a4-b8	s320f_Tau	s320f_Tau	intra-protein xl	298	267	31	4109.19	1028.31	4	-0.6	2	32.28
DRVQSKIGSLDNITHVPGGGNK-K6-156	s320f_Tau	-	monolink	353	n/a	-	2447.27	612.826	4	-1.5	3	32.26
SEKLDFK-KIETHK-a3-b1	s320f_Tau	s320f_Tau	intra-protein xl	343	370	27	1757.96	586.993	3	0	3	32.17
DNIKHVPGGGSVQIVYKPVDLSK-K4-156	s320f_Tau	-	monolink	298	n/a	-	2605.41	652.36	4	-1.1	11	32.09
IGSTENLKHQPGGGK-KLDLSNVQSKCGSK-a8-b10	s320f_Tau	s320f_Tau	intra-protein xl	267	290	23	3222.66	806.673	4	-1.8	1	31.98
CGSKDNIK-SEKLDFK-a4-b3	s320f_Tau	s320f_Tau	intra-protein xl	294	343	49	1923.96	642.327	3	-1.5	1	31.97
SKIGSTENLK-VQIINKK-a2-b6	s320f_Tau	s320f_Tau	intra-protein xl	259	280	21	2055.19	514.805	4	-1.9	2	31.82
HVPGGGSVQIVYKPVDLSK-K19-155	s320f_Tau	-	monolink	317	n/a	-	2134.17	534.551	4	-2.8	13	31.79
IGSLDNITHVPGGGNKK-KLDLSNVQSK-a16-b1	s320f_Tau	s320f_Tau	intra-protein xl	369	281	88	2974.6	595.929	5	-1.5	2	31.71
IGSTENLKHQPGGGKVQIINK-K15-156	s320f_Tau	-	monolink	274	n/a	-	2373.3	594.332	4	-1.4	2	31.41
HVPGGGSVQIVYKPVDLSK-K13-K19	s320f_Tau	-	intralink	311	317	6	2117.15	706.726	3	0.7	1	31.35
VQSKIGSLDNITHVPGGGNK-K4-K20	s320f_Tau	-	intralink	353	369	16	2158.14	720.388	3	0.9	16	31.2
IGSLDNITHVPGGGNKK-IGSTENLKHQPGGGK-a16-b8	s320f_Tau	s320f_Tau	intra-protein xl	369	267	102	3365.77	842.451	4	0.5	2	31.16
VTFKCGSLGNIHHKPGGGQVEVK-K4-K14	s320f_Tau	-	intralink	321	331	10	2586.34	647.592	4	-0.4	9	30.95
HVPGGGSVQIVYKPVDLSKVTFK-SEKLDFK-a19-b3	s320f_Tau	s320f_Tau	intra-protein xl	317	343	26	3457.88	692.584	5	-1.1	1	30.86
IGSTENLKHQPGGGK-SEKLDFKDR-a8-b7	s320f_Tau	s320f_Tau	intra-protein xl	267	347	80	2796.43	933.153	3	-2.1	1	30.65
DNIKHVPGGGSVQIVYKPVDLSK-KLDLSNVQSK-a4-b1	s320f_Tau	s320f_Tau	intra-protein xl	298	281	17	3718.03	620.679	6	-1.2	3	30.64
DNIKHVPGGGSVQIVYKPVDLSK-K4-K17	s320f_Tau	-	intralink	298	311	13	2587.4	647.857	4	-1.2	3	30.61
VTFKCGSLGNIHHKPGGGQVEVK-SEKLDFK-a4-b3	s320f_Tau	s320f_Tau	intra-protein xl	321	343	22	3451.79	863.955	4	-0.9	2	30.17
VQSKIGSLDNITHVPGGGNKK-K4-K20	s320f_Tau	-	intralink	353	369	16	2286.23	763.085	3	-0.5	2	29.92
VQSKIGSLDNITHVPGGGNKK-SEKLDFK-a4-b3	s320f_Tau	s320f_Tau	intra-protein xl	353	343	10	3151.68	1051.57	3	-0.8	2	29.17
VTFKCGSLGNIHHKPGGGQVEVK-IGSTENLKHQPGGGK-a4-b8	s320f_Tau	s320f_Tau	intra-protein xl	321	267	54	4108.12	1028.04	4	-0.9	1	29.14
LDLSNVQSKCGSK-SKIGSTENLK-a9-b2	s320f_Tau	s320f_Tau	intra-protein xl	290	259	31	2648.37	663.1	4	0.2	1	28.71
HVPGGGSVQIVYKPVDLSKVTFK-VQIINKK-a19-b6	s320f_Tau	s320f_Tau	intra-protein xl	317	280	37	3433.96	687.8	5	-2.2	1	28.06
VTFKCGSLGNIHHKPGGGQVEVK-LDFKDR-a4-b4	s320f_Tau	s320f_Tau	intra-protein xl	321	347	26	3378.75	564.132	6	-0.9	1	27.93
HQPGGGKVQIINKK-K7-156	s320f_Tau	-	monolink	274	n/a	-	1658.94	553.989	3	-1.2	2	27.68
IGSLDNITHVPGGGNKKIETHK-K16-156	s320f_Tau	-	monolink	369	n/a	-	2470.32	618.587	4	-0.9	2	27.32
DGSKPPEGSSPPTKPAPPTK-HVPGGGSVQIVYKPVDLSK-a4-b13	reverse_s320f_Tau	s320f_Tau	intra-protein xl	252	311	59	4091.15	682.866	6	-1.7	3	27.24
CGSLGNIHHKPGGGQVEVK-CGSLGNIHHKPGGGQVEVK-a10-b10	s320f_Tau	s320f_Tau	intra-protein xl	331	331	0	4084.04	1022.02	4	-1.7	1	26.96
VQSKIGSLDNITHVPGGGNK-LDLSNVQSKCGSK-a4-b9	s320f_Tau	s320f_Tau	intra-protein xl	353	290	63	3592.85	899.22	4	-0.5	1	26.96
DNIKHVPGGGSVQIVYKPVDLSK-LDLSNVQSKCGSK-a4-b9	s320f_Tau	s320f_Tau	intra-protein xl	298	290	8	4022.11	805.43	5	-0.6	2	26.95
CGSLGNIHHKPGGGQVEVKSEKLDFK-K22-156	s320f_Tau	-	monolink	343	n/a	-	2976.53	993.183	3	4.7	1	26.86
SQVNSLDLKK-CGSKDNIK-a9-b4	reverse_s320f_Tau	s320f_Tau	intra-protein xl	161	294	133	2189.14	548.292	4	-0.7	4	26.84
IGSLDNITHVPGGGNKKIETHK-K17-156	s320f_Tau	-	monolink	370	n/a	-	2470.32	495.071	5	-0.7	8	26.81
VTFKCGSLGNIHHKPGGGQVEVKSEK-K4-K23	s320f_Tau	-	intralink	321	340	19	2930.51	977.843	3	-0.8	3	26.69
VTFKCGSLGNIHHKPGGGQVEVK-HVPGGGSVQIVYKPVDLSK-a14-b13	s320f_Tau	s320f_Tau	intra-protein xl	331	311	20	4565.42	761.911	6	-1.1	3	26.41
CGSLGNIHHKPGGGQVEVKSEK-K10-156	s320f_Tau	-	monolink	331	n/a	-	2473.23	619.316	4	-2.7	1	26.41
CGSLGNIHHKPGGGQVEVK-VQIINKK-a10-b6	s320f_Tau	s320f_Tau	intra-protein xl	331	280	51	2952.59	591.526	5	-1.4	3	26.4
KLDLSNVQSKCGSK-HQPGGGKVQIINK-a10-b7	s320f_Tau	s320f_Tau	intra-protein xl	290	274	16	3075.65	1026.22	3	-1.2	1	26.38
CGSLGNIHHKPGGGQVEVK-CGSKDNIK-a10-b4	s320f_Tau	s320f_Tau	intra-protein xl	331	294	37	3031.49	758.881	4	-1.4	2	25.78
CGSLGNIHHKPGGGQVEVKSEK-K22-155	s320f_Tau	-	monolink	343	n/a	-	2472.26	825.093	3	-0.1	1	25.65
VQSKIGSLDNITHVPGGGNK-CGSLGNIHHKPGGGQVEVK-a4-b10	s320f_Tau	s320f_Tau	intra-protein xl	353	331	22	4131.13	1033.79	4	-0.4	2	25.58
CGSLGNIHHKPGGGQVEVK-HTEIKK-a10-b5	s320f_Tau	reverse_s320f_Tau	intra-protein xl	331	72	259	2865.49	574.106	5	-1.1	1	25.31
CGSLGNIHHKPGGGQVEVKSEK-K10-K19	s320f_Tau	-	intralink	331	340	9	2455.23	819.417	3	-0.2	13	25.28
LDFKDRVQSK-K4-156	s320f_Tau	-	monolink	347	n/a	-	1390.74	464.589	3	-2.2	2	25.16
HVPGGGSVQIVYKPVDLSK-HQPGGGKVQIINK-a13-b7	s320f_Tau	s320f_Tau	intra-protein xl	311	274	37	3491.92	699.392	5	-1	1	24.96
SQVNSLDLKK-INDKSGCK-a9-b4	reverse_s320f_Tau	reverse_s320f_Tau	intra-protein xl	161	148	13	2189.13	548.291	4	-1.3	2	24.95
CGSLGNIHHKPGGGQVEVK-IGSLDNITHVPGGGNKK-a10-b16	s320f_Tau	s320f_Tau	intra-protein xl	331	369	38	3816.96	955.249	4	-1.7	3	24.79
CGSLGNIHHKPGGGQVEVK-IGSTENLKHQPGGGK-a10-b8	s320f_Tau	s320f_Tau	intra-protein xl	331	267	64	3632.84	909.219	4	-0.8	2	24.77
HTEIKK-LDFKDR-a5-b4	reverse_s320f_Tau	s320f_Tau	intra-protein xl	72	347	275	1684.91	562.645	3	-1.6	1	24.68
VTFKCGSLGNIHHKPGGGQVEVK-KIETHK-a4-b1	s320f_Tau	s320f_Tau	intra-protein xl	321	370	49	3340.76	836.199	4	-1.9	1	24.37
HVPGGGSVQIVYKPVDLSKVTFK-CGSLGNIHHKPGGGQVEVK-a13-b10	s320f_Tau	s320f_Tau	intra-protein xl	311	331	20	4565.43	653.213	7	2.5	3	24.27
IGSLDNITHVPGGGNKK-SKIGSTENLK-a16-b2	s320f_Tau	s320f_Tau	intra-protein xl	369	259	110	2919.57	584.921	5	-0.6	1	24.17
HQPGGGKVQIINK-CGSKDNIK-a7-b4	s320f_Tau	s320f_Tau	intra-protein xl	274	294	20	2433.28	812.1	3	-1.2	3	24.16
CGSLGNIHHKPGGGQVEVKSEK-HTEIKK-a19-b5	s320f_Tau	reverse_s320f_Tau	intra-protein xl	340	72	268	3209.66	803.422	4	-1.6	1	24.07
VQSKIGSLDNITHVPGGGNK-SQVNSLDLKK-a4-b9	s320f_Tau	reverse_s320f_Tau	intra-protein xl	353	161	192	3288.76	823.199	4	-1	1	24.05
IGSTENLKHQPGGGK-SQVNSLDLKK-a8-b9	s320f_Tau	reverse_s320f_Tau	intra-protein xl	267	161	106	2790.48	559.104	5	-2.1	7	23.93
LDLSNVQSKCGSKDNIK-VQIINKK-a9-b6	s320f_Tau	s320f_Tau	intra-protein xl	290	280	10	2884.56	722.149	4	-2.3	2	23.83
IGSLDNITHVPGGGNKK-SEKLDFKDR-a16-b3	s320f_Tau	s320f_Tau	intra-protein xl	369	343	26	2980.56	994.528	3	-0.9	4	23.76
KIETHKLTFR-K6-156	s320f_Tau	-	monolink	375	n/a	-	1427.81	357.96	4	-2.4	1	23.52
IGSTENLKHQPGGGK-HQPGGGKVQIINK-a8-b7	s320f_Tau	s320f_Tau	intra-protein xl	267	274	7	3034.63	759.665	4	-0.9	1	23.28
VQIINKKLDLSNVQSK-K6-156	s320f_Tau	-	monolink	280	n/a	-	1982.14	496.543	4	-0.9	1	22.96
VQSKIGSLDNITHVPGGGNK-HVPGGGSVQIVYKPVDLSK-a4-b13	s320f_Tau	s320f_Tau	intra-protein xl	353	311	42	4137.21	828.45	5	-2.7	1	22.94
IGSLDNITHVPGGGNKK-HQPGGGKVQIINK-a16-b7	s320f_Tau	s320f_Tau	intra-protein xl	369	274	95	3218.75	805.696	4	0.3	3	22.73
VTFKCGSLGNIHHKPGGGQVEVK-SKIGSTENLK-a4-b2	s320f_Tau	s320f_Tau	intra-protein xl	321	259	62	3661.92	611.328	6	-0.6	1	22.59
ESKVEVQGGGPK-LDFKDR-a3-b4	reverse_s320f_Tau	s320f_Tau	intra-protein xl	102	347	245	2144.11	537.035	4	-1.6	1	22.58
DGSKPPEGSSPPTKPAPPTK-VQSKIGSLDNITHVPGGGNK-a4-b4	reverse_s320f_Tau	s320f_Tau	intra-protein xl	252	353	101	4132.13	827.433	5	-3.8	2	22.24
GDAGKAKK-GDAGKAKK-a7-b7	reverse_s320f_Tau	reverse_s320f_Tau	intra-protein xl	301	301	0	1684.95	422.245	4	0.3	1	22.01
DNIKHVPGGGSVQIVYKPVDLSKVTFK-K4-156	s320f_Tau	-	monolink	298	n/a	-	3080.69	771.18	4	-1.3	2	21.92
DNIKHVPGGGSVQIVYKPVDLSKVTFK-K4-K17	s320f_Tau	-	intralink	298	311	13	3062.68	766.677	4	-1.4	1	21.52
KIETHKLTFR-K1-K6	s320f_Tau	-	intralink	370	375	5	1409.8	470.941	3	-1.5	2	21.46
CGSLGNIHHKPGGGQVEVKSEKLDFK-K10-K19	s320f_Tau	-	intralink	331	340	9	2958.5	740.633	4	-0.7	3	21.39
VTFKCGSLGNIHHKPGGGQVEVK-CGSKDNIK-a4-b4	s320f_Tau	s320f_Tau	intra-protein xl	321	294	27	3506.77	877.701	4	-1.1	1	21.37
SEKLDFKDR-K7-156	s320f_Tau	-	monolink	347	n/a	-	1292.66	431.894	3	-1.4	3	21.09
HQPGGGKVQIINK-K7-K13	s320f_Tau	-	intralink	274	280	6	1512.84	505.288	3	-0.3	1	20.94
DNIKHVPGGGSVQIVYKPVDLSK-VTFKCGSLGNIHHKPGGGQVEVK-a4-b4	s320f_Tau	s320f_Tau	intra-protein xl	298	321	23	5035.67	1008.14	5	-0.9	6	20.65
IGSLDNITHVPGGGNKK-KIETHK-a16-b1	s320f_Tau	s320f_Tau	intra-protein xl	369	370	1	2598.41	867.144	3	-1.2	1	20.65
DNIKHVPGGGSVQIVYKPVDLSKVTFK-K4-K23	s320f_Tau	-	intralink	298	317	19	3062.68	1021.9	3	-1.2	3	20.59
VQSKIGSLDNITHVPGGGNK-ESKVEVQGGGPK-a4-b3	s320f_Tau	reverse_s320f_Tau	intra-protein xl	353	102	251	3371.77	1124.93	3	-0.1	2	20.23
GGGPQHKLNETSGIKSK-K7-K17	reverse_s320f_Tau	-	intralink	175	185	10	1874.98	626.002	3	-1.2	2	20.09
CGSLGNIHHKPGGGQVEVK-HVPGGGSVQIVYKPVDLSK-a10-b13	s320f_Tau	s320f_Tau	intra-protein xl	331	311	20	4090.14	819.036	5	-0.2	4	19.88
DNIKHVPGGGSVQIVYKPVDLSK-HQPGGGKVQIINK-a4-b7	s320f_Tau	s320f_Tau	intra-protein xl	298	274	24	3962.17	991.55	4	-0.9	2	19.39
VQSKIGSLDNITHVPGGGNK-HQPGGGKVQIINK-a4-b7	s320f_Tau	s320f_Tau	intra-protein xl	353	274	79	3532.91	707.589	5	-1.6	2	19.33
HVPGGGSVQIVYKPVDLSK-IGSLDNITHVPGGGNKK-a13-b16	s320f_Tau	s320f_Tau	intra-protein xl	311	369	58	3823.06	956.773	4	-0.8	1	19.16
KNIIQVKGGGPQHK-K7-K14	reverse_s320f_Tau	-	intralink	168	175	7	1640.93	547.986	3	-0.8	2	19.14
NIIQVKGGGPQHK-K6-156	reverse_s320f_Tau	-	monolink	168	n/a	-	1530.85	511.291	3	-1	1	18.99
TPPKSPSSAK-ENAKAK-a4-b4	s320f_Tau	s320f_Tau	intra-protein xl	234	383	149	1795.97	450	4	-0.1	1	18.83
HVPGGGSVQIVYKPVDLSKVTFK-DGSKPPEGSSPPTKPAPPTK-a13-b14	s320f_Tau	reverse_s320f_Tau	intra-protein xl	311	262	49	4566.44	653.356	7	-0.2	3	18.79
CGSLGNIHHKPGGGQVEVKSEK-KLDLSNVQSK-a19-b1	s320f_Tau	s320f_Tau	intra-protein xl	340	281	59	3585.86	897.472	4	0.4	1	18.77
HQPGGGKVQIINKK-SKIGSTENLK-a7-b2	s320f_Tau	s320f_Tau	intra-protein xl	274	259	15	2716.52	680.138	4	-1.2	1	18.76
HVPGGGSVQIVYKPVDLSK-KLDLSNVQSK-a13-b1	s320f_Tau	s320f_Tau	intra-protein xl	311	281	30	3247.78	812.953	4	-0.7	3	18.7
DNIKHVPGGGSVQIVYKPVDLSK-SKIGSTENLK-a4-b2	s320f_Tau	s320f_Tau	intra-protein xl	298	259	39	3662.98	1222	3	-1.5	1	18.57
HVPGGGSVQIVYKPVDLSKVTFKCGSLGNIHHKPGGGQVEVK-K13-156	s320f_Tau	-	monolink	311	n/a	-	4565.44	914.095	5	2.9	4	18.54
VTFKCGSLGNIHHKPGGGQVEVK-HVPGGGSVQIVYKPVDLSK-a4-b13	s320f_Tau	s320f_Tau	intra-protein xl	321	311	10	4565.42	1142.36	4	-0.6	14	18.09
HVPGGGSVQIVYKPVDLSK-SKIGSTENLK-a13-b2	s320f_Tau	s320f_Tau	intra-protein xl	311	259	52	3192.74	1065.25	3	-0.5	1	17.95
HVPGGGSVQIVYKPVDLSK-SQVNSLDLKK-a13-b9	s320f_Tau	reverse_s320f_Tau	intra-protein xl	311	161	150	3247.78	812.952	4	-1.3	1	17.91
CGSKDNIKHVPGGGSVQIVYKPVDLSK-K4-156	s320f_Tau	-	monolink	294	n/a	-	3037.59	608.525	5	-1.2	3	17.78
SKIGSTENLKHQPGGGK-K2-156	s320f_Tau	-	monolink	259	n/a	-	1892.99	632.006	3	-0.4	3	17.66
HVPGGGSVQIVYKPVDLSKVTFKCGSLGNIHHKPGGGQVEVK-K23-156	s320f_Tau	-	monolink	321	n/a	-	4565.42	653.21	7	-1.3	2	17.58
DKFDLK-MVSKSK-a2-b4	reverse_s320f_Tau	s320f_Tau	intra-protein xl	95	130	35	1580.85	527.959	3	3.8	2	17.41
HVPGGGSVQIVYKPVDLSKVTFK-DGSKPPEGSSPPTKPAPPTK-a19-b4	s320f_Tau	reverse_s320f_Tau	intra-protein xl	317	252	65	4566.43	762.079	6	-2.4	8	17.18
IGSTENLKHQPGGGK-K8-K15	s320f_Tau	-	intralink	267	274	7	1659.85	554.292	3	-2.8	8	17.06
DKFDLKESK-KNIIQVK-a6-b1	reverse_s320f_Tau	reverse_s320f_Tau	intra-protein xl	99	162	63	2088.18	697.069	3	0.5	1	16.78
VTFKCGSLGNIHHKPGGGQVEVK-SQVNSLDLKK-a4-b9	s320f_Tau	reverse_s320f_Tau	intra-protein xl	321	161	160	3716.97	930.249	4	-0.7	1	16.4
YVIEAGHDTKAK-MVSKSK-a10-b4	reverse_s320f_Tau	s320f_Tau	intra-protein xl	57	130	73	2147.12	716.716	3	-2.7	1	16.36
HVPGGGSVQIVYKPVDLSKVTFKCGSLGNIHHKPGGGQVEVK-K23-155	s320f_Tau	-	monolink	321	n/a	-	4564.43	913.894	5	-1.5	3	16.29
GDAGKAK-GDAGKAK-a5-b5	reverse_s320f_Tau	reverse_s320f_Tau	intra-protein xl	299	299	0	1428.76	477.26	3	0.5	2	16.1
SKIGSTENLKHQPGGGK-K2-K17	s320f_Tau	-	intralink	259	274	15	1874.99	626.003	3	0.3	2	15.97
CGSLGNIHHKPGGGQVEVK-SEKLDFKDR-a10-b7	s320f_Tau	s320f_Tau	intra-protein xl	331	347	16	3247.64	812.918	4	-0.4	1	15.74
HVPGGGSVQIVYKPVDLSK-IGSTENLKHQPGGGK-a13-b8	s320f_Tau	s320f_Tau	intra-protein xl	311	267	44	3638.94	910.742	4	-1.1	3	15.44
VEVQGGGPKHHINGLSGCKFTVK-HVPGGGSVQIVYKPVDLSK-a9-b13	reverse_s320f_Tau	s320f_Tau	intra-protein xl	111	311	200	4565.42	914.092	5	-0.2	2	15.29
GGGPQHKLNETSGIKSK-K7-K15	reverse_s320f_Tau	-	intralink	175	183	8	1874.98	626.002	3	-1.2	1	14.95
DGSKPPEGSSPPTKPAPPTK-SEKLDFKDR-a14-b7	reverse_s320f_Tau	s320f_Tau	intra-protein xl	262	347	85	3248.64	813.168	4	-4.3	1	14.9
DGSKPPEGSSPPTKPAPPTK-SEKLDFK-a14-b3	reverse_s320f_Tau	s320f_Tau	intra-protein xl	262	343	81	2977.53	745.39	4	0	2	14.87
NVKSKIGSTENLK-K3-156	s320f_Tau	-	monolink	257	n/a	-	1572.87	525.298	3	-1.6	1	14.77
ESKVEVQGGGPKHHINGLSGCK-K3-K22	reverse_s320f_Tau	-	intralink	102	121	19	2455.23	614.815	4	-0.4	8	14.76
DGSKPPEGSSPPTKPAPPTK-HVPGGGSVQIVYKPVDLSK-a14-b13	reverse_s320f_Tau	s320f_Tau	intra-protein xl	262	311	49	4091.14	1364.72	3	-3.2	3	14.67
DGSKPPEGSSPPTKPAPPTK-SEKLDFK-a4-b3	reverse_s320f_Tau	s320f_Tau	intra-protein xl	252	343	91	2977.53	993.519	3	2.1	2	14.64
HVPGGGSVQIVYKPVDLSKVTFK-DGSKPPEGSSPPTKPAPPTK-a19-b14	s320f_Tau	reverse_s320f_Tau	intra-protein xl	317	262	55	4566.44	653.357	7	0.9	4	14.37
CGSLGNIHHKPGGGQVEVK-DGTGSDDKKAK-a10-b8	s320f_Tau	s320f_Tau	intra-protein xl	331	140	191	3231.61	808.91	4	4.7	1	14.18
KLDLSNVQSKCGSK-LNETSGIKSKVNK-a10-b8	s320f_Tau	reverse_s320f_Tau	intra-protein xl	290	183	107	3117.66	780.424	4	-2.2	4	14.07
CGSLGNIHHKPGGGQVEVKSEK-K19-K22	s320f_Tau	-	intralink	340	343	3	2455.22	614.813	4	-3	1	13.95
GAAPPGQKGQANATR-NIIQVKGGGPQHK-a8-b6	s320f_Tau	reverse_s320f_Tau	intra-protein xl	163	168	5	2935.56	588.121	5	-3.3	1	13.84
VEVQGGGPKHHINGLSGCK-VQIINKK-a9-b6	reverse_s320f_Tau	s320f_Tau	intra-protein xl	111	280	169	2952.59	739.156	4	-1.8	1	13.72
KLDLSNVQSKCGSK-LNETSGIKSKVNK-a10-b10	s320f_Tau	reverse_s320f_Tau	intra-protein xl	290	185	105	3117.66	780.424	4	-2.2	3	13.7
HQPGGGKVQIINK-SQVNSLDLKK-a7-b9	s320f_Tau	reverse_s320f_Tau	intra-protein xl	274	161	113	2643.47	529.701	5	-1.3	2	13.53
LNETSGIKSKVNK-K10-156	reverse_s320f_Tau	-	monolink	185	n/a	-	1572.87	525.298	3	-1.2	1	13.51
HVPGGGSVQIVYKPVDLSKVTFK-DGSKPPEGSSPPTKPAPPTK-a13-b4	s320f_Tau	reverse_s320f_Tau	intra-protein xl	311	252	59	4566.44	653.356	7	-0.2	2	13.49
DNIKHVPGGGSVQIVYKPVDLSKVTFK-DGSKPPEGSSPPTKPAPPTK-a23-b14	s320f_Tau	reverse_s320f_Tau	intra-protein xl	317	262	55	5036.67	840.453	6	-2.4	6	13.43
KLDLSNVQSKCGSK-K14-156	s320f_Tau	-	monolink	294	n/a	-	1718.88	573.969	3	-2.3	2	13.34
IATPRGAAPPGQKGQANATR-TPPKSPSSAK-a13-b4	s320f_Tau	s320f_Tau	intra-protein xl	163	234	71	3097.67	775.426	4	2.9	1	13.31
CGSLGNIHHKPGGGQVEVK-HQPGGGKVQIINK-a10-b7	s320f_Tau	s320f_Tau	intra-protein xl	331	274	57	3485.83	872.464	4	-1.4	1	13.28
DNIKHVPGGGSVQIVYKPVDLSK-VTFKCGSLGNIHHKPGGGQVEVK-a17-b14	s320f_Tau	s320f_Tau	intra-protein xl	311	331	20	5035.65	720.386	7	-4.6	1	13.22
VQSKIGSLDNITHVPGGGNKK-K20-156	s320f_Tau	-	monolink	369	n/a	-	2304.25	769.09	3	1	4	13.2
HTEIKKNGGGPVHTINDLSGIK-K6-156	reverse_s320f_Tau	-	monolink	73	n/a	-	2470.32	495.071	5	-0.7	1	12.99
HVPGGGSVQIVYKPVDLSKVTFKCGSLGNIHHKPGGGQVEVK-K13-K19	s320f_Tau	-	intralink	311	317	6	4547.4	910.489	5	-1.4	1	12.72
GGGPQHKLNETSGIKSK-LNETSGIKSK-a7-b8	reverse_s320f_Tau	reverse_s320f_Tau	intra-protein xl	175	183	8	2950.59	591.125	5	4.3	3	12.59
LDLSNVQSKCGSK-KLDLSNVQSK-a9-b1	s320f_Tau	s320f_Tau	intra-protein xl	290	281	9	2703.41	902.144	3	-0.7	1	12.45
DNIKHVPGGGSVQIVYKPVDLSKVTFK-K17-155	s320f_Tau	-	monolink	311	n/a	-	3079.7	770.934	4	-1.1	1	12.42
KNGGGPVHTINDLSGIK-K1-K17	reverse_s320f_Tau	-	intralink	73	89	16	1843.98	615.666	3	-1.9	1	12.42
SKIGSTENLKHQPGGGK-K10-156	s320f_Tau	-	monolink	267	n/a	-	1892.99	474.256	4	-1.5	2	12.15
FDLKESKVEVQGGGPK-ASSPSKPPTR-a7-b6	reverse_s320f_Tau	reverse_s320f_Tau	intra-protein xl	102	208	106	2881.53	721.39	4	3.5	1	12
CGSLGNIHHKPGGGQVEVK-K10-K19	s320f_Tau	-	intralink	331	340	9	2111.05	528.771	4	-1.9	16	11.97
DGSKPPEGSSPPTKPAPPTK-IGSLDNITHVPGGGNKK-a4-b16	reverse_s320f_Tau	s320f_Tau	intra-protein xl	252	369	117	3817.97	1273.66	3	-4.1	1	11.96
IPAKTPPAPKTPPSSGEPPK-K10-K20	s320f_Tau	-	intralink	180	190	10	2134.17	534.551	4	3.2	24	11.81
HVPGGGSVQIVYKPVDLSKVTFKCGSLGNIHHKPGGGQVEVK-K19-155	s320f_Tau	-	monolink	317	n/a	-	4564.44	1142.12	4	-0.9	3	11.8
SKIGSTENLKHQPGGGK-TPPKSPSSAKSR-a10-b10	s320f_Tau	s320f_Tau	intra-protein xl	267	240	27	3116.66	624.34	5	0.2	1	11.61
VTFKCGSLGNIHHKPGGGQVEVKSEK-K23-156	s320f_Tau	-	monolink	340	n/a	-	2948.51	738.137	4	-1	1	11.59
TPPKSPSSAKSR-HTEIKK-a4-b5	s320f_Tau	reverse_s320f_Tau	intra-protein xl	234	72	162	2134.18	712.401	3	2.9	2	11.15
SKASSPSKPPTR-HTEIKK-a2-b5	reverse_s320f_Tau	reverse_s320f_Tau	intra-protein xl	202	72	130	2134.18	712.4	3	0.8	7	11.04
IGSTENLKHQPGGGKVQIINK-LNETSGIKSK-a15-b8	s320f_Tau	reverse_s320f_Tau	intra-protein xl	274	183	91	3430.87	572.82	6	-1.6	1	10.95
LDLSNVQSKCGSK-SQVNSLDLKK-a9-b9	s320f_Tau	reverse_s320f_Tau	intra-protein xl	290	161	129	2703.41	902.144	3	-0.7	2	10.84
SPSSAKSRLQTAPVPMPDLK-YVIQVSGGGPVHKINDK-a6-b13	s320f_Tau	reverse_s320f_Tau	intra-protein xl	240	144	96	4057.17	812.441	5	-0.1	1	10.78
KLDLSNVQSKCGSK-NVKSKIGSTENLK-a1-b5	s320f_Tau	s320f_Tau	intra-protein xl	281	259	22	3117.66	624.539	5	-4.2	1	10.78
VQSKIGSLDNITHVPGGGNK-INDKSGCK-a4-b4	s320f_Tau	reverse_s320f_Tau	intra-protein xl	353	148	205	3078.57	1027.2	3	-1.1	1	10.77
LQTAPVPXPDLKNVK-NVKSKIGSTENLK-a12-b5	s320f_Tau	s320f_Tau	intra-protein xl	254	259	5	3220.78	1074.6	3	0.3	2	10.72
SRLQTAPVPMPDLKNVK-INDKSGCK-a14-b4	s320f_Tau	reverse_s320f_Tau	intra-protein xl	254	148	106	2951.55	738.896	4	-1.4	1	10.65
YVIEAGHDTKAK-SEKLDFKDR-a10-b3	reverse_s320f_Tau	s320f_Tau	intra-protein xl	57	343	286	2605.35	869.457	3	2.8	3	10.6
VQSKIGSLDNITHVPGGGNKK-SEKLDFKDR-a4-b7	s320f_Tau	s320f_Tau	intra-protein xl	353	347	6	3422.81	856.711	4	-0.8	2	10.43
SQVRDKFDLK-K6-156	reverse_s320f_Tau	-	monolink	95	n/a	-	1390.74	464.589	3	-1.7	1	10.42
DGSKPPEGSSPPTKPAPPTK-CGSKDNIK-a14-b4	reverse_s320f_Tau	s320f_Tau	intra-protein xl	262	294	32	3032.5	1011.84	3	-4.9	1	10.4
DDSGTGDKSK-INDKSGCK-a8-b4	reverse_s320f_Tau	reverse_s320f_Tau	intra-protein xl	310	148	162	2066.95	689.991	3	3.1	1	10.38
DNIKHVPGGGSVQIVYKPVDLSK-VTFKCGSLGNIHHKPGGGQVEVK-a4-b14	s320f_Tau	s320f_Tau	intra-protein xl	298	331	33	5035.66	1008.14	5	-1.5	1	10.29
GGGPQHKLNETSGIKSK-TPPKSPSSAKSR-a7-b4	reverse_s320f_Tau	s320f_Tau	intra-protein xl	175	234	59	3116.66	624.339	5	-0.1	1	10.23
FTLKHTEIK-LDFKDR-a4-b4	reverse_s320f_Tau	s320f_Tau	intra-protein xl	67	347	280	2046.12	683.049	3	4.7	1	10.2
SLDVPKYVIQVSGGGPVHK-K6-156	reverse_s320f_Tau	-	monolink	131	n/a	-	2135.17	712.732	3	5	24	10.07
HVPGGGSVQIVYKPVDLSKVTFKCGSLGNIHHKPGGGQVEVK-K23-K33	s320f_Tau	-	intralink	321	331	10	4547.4	910.489	5	-1.4	2	10.05
DNIKHVPGGGSVQIVYKPVDLSKVTFK-DGSKPPEGSSPPTKPAPPTK-a17-b14	s320f_Tau	reverse_s320f_Tau	intra-protein xl	311	262	49	5036.67	840.453	6	-2.9	3	10.01
DGSKPPEGSSPPTKPAPPTKAPIR-CGSKDNIK-a4-b4	reverse_s320f_Tau	s320f_Tau	intra-protein xl	252	294	42	3469.8	868.459	4	4.7	1	9.98
TPPKSPSSAKSR-KIETHK-a10-b1	s320f_Tau	s320f_Tau	intra-protein xl	240	370	130	2134.18	712.4	3	0.3	2	9.97
KLDLSNVQSKCGSK-NVKSKIGSTENLK-a10-b3	s320f_Tau	s320f_Tau	intra-protein xl	290	257	33	3117.66	1040.23	3	-2.5	8	9.89
INDKSGCKSQVNSLDLK-LNETSGIKSKVNK-a4-b10	reverse_s320f_Tau	reverse_s320f_Tau	intra-protein xl	148	185	37	3459.81	865.961	4	-3	1	9.85
LQTAPVPXPDLKNVK-NVKSKIGSTENLK-a12-b3	s320f_Tau	s320f_Tau	intra-protein xl	254	257	3	3220.78	1074.6	3	0.3	1	9.69
VQSKIGSLDNITHVPGGGNKK-K21-156	s320f_Tau	-	monolink	370	n/a	-	2304.25	769.09	3	1	2	9.69
HTEIKKNGGGPVHTINDLSGIK-K22-156	reverse_s320f_Tau	-	monolink	89	n/a	-	2470.32	495.071	5	-0.9	1	9.46
TPPKSPSSAKSR-KIETHK-a4-b1	s320f_Tau	s320f_Tau	intra-protein xl	234	370	136	2134.18	712.4	3	0.5	8	9.42
LQTAPVPMPDLKNVK-YVIEAGHDTKAK-a12-b10	s320f_Tau	reverse_s320f_Tau	intra-protein xl	254	57	197	3118.66	780.673	4	-4.3	2	9.41
SKIGSTENLKHQPGGGK-SKASSPSKPPTR-a2-b2	s320f_Tau	reverse_s320f_Tau	intra-protein xl	259	202	57	3116.66	780.173	4	0.5	3	9.4
SGCKSQVNSLDLKK-NVKSKIGSTENLK-a4-b5	reverse_s320f_Tau	s320f_Tau	intra-protein xl	152	259	107	3117.66	780.423	4	-3.1	1	9.34
HVPGGGSVQIVYKPVDLSKVTFK-K13-155	s320f_Tau	-	monolink	311	n/a	-	2609.45	870.826	3	-2.1	5	9.32
SKIGSTENLKHQPGGGK-SKASSPSKPPTR-a10-b2	s320f_Tau	reverse_s320f_Tau	intra-protein xl	267	202	65	3116.66	624.339	5	-0.1	4	9.27
HVPGGGSVQIVYKPVDLSKVTFKCGSLGNIHHKPGGGQVEVK-K13-155	s320f_Tau	-	monolink	311	n/a	-	4564.43	913.894	5	-2.1	1	9.26
DNIKHVPGGGSVQIVYKPVDLSKVTFK-K4-K27	s320f_Tau	-	intralink	298	321	23	3062.68	766.677	4	-1.4	1	9.26
IPAKTPPAPKTPPSSGEPPK-K4-K20	s320f_Tau	-	intralink	174	190	16	2134.18	712.4	3	4.2	10	9.24
DGSKPPEGSSPPTKPAPPTK-K4-155	reverse_s320f_Tau	-	monolink	252	n/a	-	2129.1	710.708	3	-0.6	2	9.19
IGSLDNITHVPGGGNKK-GDAGKAKK-a16-b5	s320f_Tau	reverse_s320f_Tau	intra-protein xl	369	299	70	2617.41	873.477	3	-4.6	1	9.15
KPERTPPTPLSPTRSR-SKDGTGSDDKK-a1-b10	reverse_s320f_Tau	s320f_Tau	intra-protein xl	218	140	78	3093.61	1032.21	3	3.1	5	9.13
TPPAPKTPPSSGEPPK-ASSPSKPPTRVVAVK-a6-b6	s320f_Tau	reverse_s320f_Tau	intra-protein xl	180	208	28	3247.8	650.567	5	4.4	1	9.05
IPAKTPPAPKTPPSSGEPPK-K4-K10	s320f_Tau	-	intralink	174	180	6	2134.18	712.4	3	3.7	11	9.03
SKIGSTENLKHQPGGGK-SKASSPSKPPTR-a2-b8	s320f_Tau	reverse_s320f_Tau	intra-protein xl	259	208	51	3116.66	780.173	4	0.4	2	8.96
VEVQGGGPKHHINGLSGCK-K9-K19	reverse_s320f_Tau	-	intralink	111	121	10	2111.06	704.693	3	-1.1	21	8.96
SKASSPSKPPTR-KIETHK-a2-b1	reverse_s320f_Tau	s320f_Tau	intra-protein xl	202	370	168	2134.18	712.4	3	0.8	6	8.94
SKASSPSKPPTR-HTEIKK-a8-b5	reverse_s320f_Tau	reverse_s320f_Tau	intra-protein xl	208	72	136	2134.18	712.4	3	0.7	2	8.82
DDSGTGDKSKSVXR-VVAVKKPER-a10-b6	reverse_s320f_Tau	reverse_s320f_Tau	intra-protein xl	312	218	94	2660.38	887.802	3	0.8	1	8.81
VQSKIGSLDNITHVPGGGNKK-K20-155	s320f_Tau	-	monolink	369	n/a	-	2303.26	768.76	3	-2.3	1	8.78
DDSGTGDKSKSVMR-KNIIQVK-a10-b1	reverse_s320f_Tau	reverse_s320f_Tau	intra-protein xl	312	162	150	2461.28	616.327	4	-3.8	2	8.76
ESKVEVQGGGPKHHINGLSGCK-K12-K22	reverse_s320f_Tau	-	intralink	111	121	10	2455.23	819.417	3	-0.2	2	8.75
TPPAPKTPPSSGEPPKSGDR-KAKGADGK-a16-b1	s320f_Tau	s320f_Tau	intra-protein xl	190	141	49	2913.51	729.387	4	-1.6	2	8.73
VQSKIGSLDNITHVPGGGNK-K20-155	s320f_Tau	-	monolink	369	n/a	-	2175.16	726.063	3	-0.9	1	8.66
NIIQVKGGGPQHK-K13-156	reverse_s320f_Tau	-	monolink	175	n/a	-	1530.85	511.291	3	-2.2	1	8.6
SGCKSQVNSLDLK-YVIEAGHDTKAK-a4-b10	reverse_s320f_Tau	reverse_s320f_Tau	intra-protein xl	152	57	95	2903.47	968.83	3	-0.9	1	8.58
GGGPQHKLNETSGIKSK-K7-156	reverse_s320f_Tau	-	monolink	175	n/a	-	1892.99	632.006	3	-0.4	1	8.56
SGCKSQVNSLDLKK-NVKSKIGSTENLK-a13-b5	reverse_s320f_Tau	s320f_Tau	intra-protein xl	161	259	98	3117.66	624.541	5	-2.2	1	8.54
TPPAPKTPPSSGEPPKSGDR-KVAVVRTPPK-a6-b1	s320f_Tau	s320f_Tau	intra-protein xl	180	225	45	3233.77	809.451	4	-1	3	8.53
DGSKPPEGSSPPTKPAPPTK-IGSTENLKHQPGGGK-a4-b8	reverse_s320f_Tau	s320f_Tau	intra-protein xl	252	267	15	3633.85	727.777	5	-4.8	1	8.52
HVPGGGSVQIVYKPVDLSKVTFKCGSLGNIHHKPGGGQVEVK-K33-155	s320f_Tau	-	monolink	331	n/a	-	4564.43	913.894	5	-2.1	3	8.39
SKIGSTENLKHQPGGGK-KIETHK-a10-b1	s320f_Tau	s320f_Tau	intra-protein xl	267	370	103	2629.41	877.478	3	-3.1	1	8.39
IGSLDNITHVPGGGNKK-K16-K17	s320f_Tau	-	intralink	369	370	1	1843.98	615.667	3	-0.3	2	8.38
KLDLSNVQSKCGSK-LNETSGIKSKVNK-a1-b10	s320f_Tau	reverse_s320f_Tau	intra-protein xl	281	185	96	3117.66	1040.23	3	-2.5	2	8.32
KLDLSNVQSKCGSK-NVKSKIGSTENLK-a10-b5	s320f_Tau	s320f_Tau	intra-protein xl	290	259	31	3117.66	520.618	6	-3	2	8.26
LQTAPVPXPDLKNVKSK-SKASSPSKPPTRVVAVK-a12-b2	s320f_Tau	reverse_s320f_Tau	intra-protein xl	254	202	52	3757.1	752.428	5	-4.6	1	8.24
GAAPPGQKGQANATR-LNETSGIKSK-a8-b8	s320f_Tau	reverse_s320f_Tau	intra-protein xl	163	183	20	2636.39	528.285	5	-0.2	1	8.12
YVIQVSGGGPVHKINDK-KIETHKLTFR-a13-b1	reverse_s320f_Tau	s320f_Tau	intra-protein xl	144	370	226	3219.78	1074.27	3	2.1	13	7.99
HVPGGGSVQIVYKPVDLSK-HTEIKK-a13-b5	s320f_Tau	reverse_s320f_Tau	intra-protein xl	311	72	239	2871.59	718.905	4	1.4	1	7.99
ESKVEVQGGGPKHHINGLSGCK-DGSKPPEGSSPPTKPAPPTK-a3-b14	reverse_s320f_Tau	reverse_s320f_Tau	intra-protein xl	102	262	160	4429.23	886.854	5	-0.5	1	7.97
HVPGGGSVQIVYKPVDLSKVTFK-K19-156	s320f_Tau	-	monolink	317	n/a	-	2610.45	871.157	3	2.5	1	7.91
GGGPQHKLNETSGIKSK-LNETSGIKSK-a15-b8	reverse_s320f_Tau	reverse_s320f_Tau	intra-protein xl	183	183	0	2950.57	591.122	5	-0.2	4	7.88
AKTDHGAEIVYK-TPPKSPSSAKSR-a2-b10	s320f_Tau	s320f_Tau	intra-protein xl	385	240	145	2710.44	904.487	3	3.2	1	7.84
VNKLDPMPVPATQLRSK-KLDLSNVQSK-a3-b1	reverse_s320f_Tau	s320f_Tau	intra-protein xl	188	281	93	3161.74	633.356	5	-2	1	7.82
KLDLSNVQSKCGSK-NVKSKIGSTENLK-a1-b3	s320f_Tau	s320f_Tau	intra-protein xl	281	257	24	3117.66	1040.23	3	-2.5	2	7.76
ESKVEVQGGGPKHHINGLSGCK-K3-K12	reverse_s320f_Tau	-	intralink	102	111	9	2455.23	614.814	4	-0.9	1	7.7
AKTDHGAEIVYK-SEKLDFKDR-a2-b3	s320f_Tau	s320f_Tau	intra-protein xl	385	343	42	2605.34	869.456	3	2.5	1	7.68
CGSLGNIHHKPGGGQVEVK-KPERTPPTPLSPTRSR-a10-b1	s320f_Tau	reverse_s320f_Tau	intra-protein xl	331	218	113	3930.06	787.02	5	-0.9	2	7.66
VQSKIGSLDNITHVPGGGNK-K20-156	s320f_Tau	-	monolink	369	n/a	-	2176.15	726.392	3	1.5	2	7.63
FDLKESKVEVQGGGPK-AKTDHGAEIVYK-a4-b2	reverse_s320f_Tau	s320f_Tau	intra-protein xl	99	385	286	3185.67	1062.9	3	1.5	1	7.58
DNIKHVPGGGSVQIVYKPVDLSKVTFK-CGSLGNIHHKPGGGQVEVK-a4-b10	s320f_Tau	s320f_Tau	intra-protein xl	298	331	33	5035.68	840.287	6	1.5	1	7.57
CGSLGNIHHKPGGGQVEVKSEKLDFK-K10-K22	s320f_Tau	-	intralink	331	343	12	2958.51	987.177	3	1.6	1	7.56
KNGGGPVHTINDLSGIK-K1-155	reverse_s320f_Tau	-	monolink	73	n/a	-	1861	621.343	3	-1.7	2	7.51
SEKLDFKDR-ENAKAK-a7-b4	s320f_Tau	s320f_Tau	intra-protein xl	347	383	36	1934.02	484.513	4	5	1	7.47
SGCKSQVNSLDLKK-LNETSGIKSKVNK-a13-b8	reverse_s320f_Tau	reverse_s320f_Tau	intra-protein xl	161	183	22	3117.66	624.54	5	-3.4	1	7.47
VQSKIGSLDNITHVPGGGNKK-TPSLPTPPTREPKK-a20-b13	s320f_Tau	s320f_Tau	intra-protein xl	369	224	145	3834.1	1279.04	3	0.9	1	7.41
YVIQVSGGGPVHKINDK-FTLKHTEIK-a13-b4	reverse_s320f_Tau	reverse_s320f_Tau	intra-protein xl	144	67	77	3063.68	1022.23	3	0.5	1	7.38
SKIGSTENLKHQPGGGK-KPERTPPTPLSPTRSR-a10-b1	s320f_Tau	reverse_s320f_Tau	intra-protein xl	267	218	49	3694.01	1232.34	3	3.5	1	7.36
GGGPQHKLNETSGIKSK-K15-156	reverse_s320f_Tau	-	monolink	183	n/a	-	1892.99	632.006	3	-0.6	2	7.34
VQIINKKLDLSNVQSK-FTLKHTEIKK-a6-b9	s320f_Tau	reverse_s320f_Tau	intra-protein xl	280	72	208	3207.87	1070.3	3	3.2	1	7.3
SLDVPKYVIQVSGGGPVHKINDK-K6-155	reverse_s320f_Tau	-	monolink	131	n/a	-	2604.43	869.151	3	0.1	2	7.28
YVIQVSGGGPVHKINDK-KIETHKLTFR-a13-b6	reverse_s320f_Tau	s320f_Tau	intra-protein xl	144	375	231	3219.78	1074.27	3	1.2	3	7.22
VEVQGGGPKHHINGLSGCKFTVK-HVPGGGSVQIVYKPVDLSK-a19-b13	reverse_s320f_Tau	s320f_Tau	intra-protein xl	121	311	190	4565.43	914.094	5	1.7	2	7.2
KNIIQVKGGGPQHK-CGSKDNIK-a1-b4	reverse_s320f_Tau	s320f_Tau	intra-protein xl	162	294	132	2561.37	854.799	3	-0.4	1	7.19
HVPGGGSVQIVYKPVDLSKVTFK-K23-155	s320f_Tau	-	monolink	321	n/a	-	2609.46	870.829	3	1.6	1	7.18
ESKVEVQGGGPK-FTLKHTEIKK-a3-b9	reverse_s320f_Tau	reverse_s320f_Tau	intra-protein xl	102	72	30	2595.44	866.154	3	4	1	7.15
KLDLSNVQSKCGSK-LNETSGIKSKVNK-a1-b8	s320f_Tau	reverse_s320f_Tau	intra-protein xl	281	183	98	3117.66	624.54	5	-3.4	1	7.06
GGGPQHKLNETSGIK-K7-156	reverse_s320f_Tau	-	monolink	175	n/a	-	1677.87	560.296	3	-2.1	2	7.05
LDPMPVPATQLRSKASSPSKPPTR-TPPSSGEPPKSGDR-a14-b10	reverse_s320f_Tau	s320f_Tau	intra-protein xl	202	190	12	4109.13	822.834	5	1.7	1	7
ENAKAKTDHGAEIVYK-XVSKSK-a4-b4	s320f_Tau	s320f_Tau	intra-protein xl	383	130	253	2605.35	652.344	4	1.4	1	6.95
GGGPQHKLNETSGIKSK-SKASSPSKPPTR-a15-b2	reverse_s320f_Tau	reverse_s320f_Tau	intra-protein xl	183	202	19	3116.66	1039.89	3	-0.3	4	6.95
GGGPQHKLNETSGIKSK-SKIGSTENLK-a7-b2	reverse_s320f_Tau	s320f_Tau	intra-protein xl	175	259	84	2950.59	738.654	4	4.3	2	6.92
AKKDDSGTGDK-FTVKSLDVPK-a3-b4	reverse_s320f_Tau	reverse_s320f_Tau	intra-protein xl	302	125	177	2391.26	598.824	4	4.4	1	6.88
TDHGAEIVYKSPVVSGDTSPR-YVIQVSGGGPVHKINDK-a10-b13	s320f_Tau	reverse_s320f_Tau	intra-protein xl	395	144	251	4162.14	1041.54	4	1.5	1	6.78
SQVNSLDLKKNIIQVK-FTLKHTEIKK-a10-b4	reverse_s320f_Tau	reverse_s320f_Tau	intra-protein xl	162	67	95	3207.87	1070.3	3	2.7	1	6.69
LDPXPVPATQLRSKASSPSKPPTR-FTVKSLDVPK-a14-b4	reverse_s320f_Tau	reverse_s320f_Tau	intra-protein xl	202	125	77	3847.1	962.783	4	2	4	6.68
SLDVPKYVIQVSGGGPVHK-K6-155	reverse_s320f_Tau	-	monolink	131	n/a	-	2134.18	712.4	3	-2.1	13	6.65
SLDVPKYVIQVSGGGPVHK-K19-156	reverse_s320f_Tau	-	monolink	144	n/a	-	2135.17	712.732	3	3.9	4	6.59
KDDSGTGDKSK-AKGADGKTK-a9-b7	reverse_s320f_Tau	s320f_Tau	intra-protein xl	310	148	162	2149.08	717.369	3	-1.3	1	6.55
QGPPAAGRPTAIKTKGDAGK-AKKDDSGTGDK-a15-b3	reverse_s320f_Tau	reverse_s320f_Tau	intra-protein xl	294	302	8	3178.67	1060.56	3	3.6	1	6.45
GGGPQHKLNETSGIKSK-TPPKSPSSAKSR-a15-b10	reverse_s320f_Tau	s320f_Tau	intra-protein xl	183	240	57	3116.66	780.173	4	0.8	2	6.4
ESKVEVQGGGPKHHINGLSGCK-GAAPPGQKGQANATRIPAK-a3-b8	reverse_s320f_Tau	s320f_Tau	intra-protein xl	102	163	61	4287.23	858.453	5	-0.3	1	6.37
TANAQGKQGPPAAGRPTAIKTK-YVIQVSGGGPVHKINDK-a20-b13	reverse_s320f_Tau	reverse_s320f_Tau	intra-protein xl	292	144	148	4110.23	1028.57	4	-1.2	1	6.27
HVPGGGSVQIVYKPVDLSKVTFKCGSLGNIHHKPGGGQVEVK-K42-155	s320f_Tau	-	monolink	340	n/a	-	4564.43	913.894	5	-1.5	1	6.16
LQTAPVPMPDLKNVK-AKTDHGAEIVYK-a12-b2	s320f_Tau	s320f_Tau	intra-protein xl	254	385	131	3118.66	1040.56	3	-2.7	2	6.16
ADSTESGPEESGDETPTQLPSEKLGADTDGEQDQHMTYGGQDKR-GAAPPGQKGQANATRIPAK-a43-b8	reverse_s320f_Tau	s320f_Tau	intra-protein xl	418	163	255	6663.06	1111.52	6	-3.6	1	6.14
GGGPQHKLNETSGIKSK-SKASSPSKPPTR-a7-b8	reverse_s320f_Tau	reverse_s320f_Tau	intra-protein xl	175	208	33	3116.67	780.175	4	3.5	2	6.12
DNIKHVPGGGSVQIVYKPVDLSKVTFK-VEVQGGGPKHHINGLSGCK-a23-b9	s320f_Tau	reverse_s320f_Tau	intra-protein xl	317	111	206	5035.69	720.392	7	3.3	1	6.06
APIRTANAQGKQGPPAAGRPTAIK-LQTAPVPXPDLKNVKSK-a11-b15	reverse_s320f_Tau	s320f_Tau	intra-protein xl	279	257	22	4389.43	878.893	5	-1.6	1	6
GGGPQHKLNETSGIKSK-SKASSPSKPPTR-a7-b2	reverse_s320f_Tau	reverse_s320f_Tau	intra-protein xl	175	202	27	3116.66	1039.89	3	-0.3	1	5.99
HVPGGGSVQIVYKPVDLSKVTFKCGSLGNIHHKPGGGQVEVK-K13-K42	s320f_Tau	-	intralink	311	340	29	4547.39	910.486	5	-4	1	5.97
IGSLDNITHVPGGGNKKIETHK-K22-156	s320f_Tau	-	monolink	375	n/a	-	2470.32	824.447	3	-0.2	1	5.95
SLDVPKYVIQVSGGGPVHK-K19-155	reverse_s320f_Tau	-	monolink	144	n/a	-	2134.18	712.401	3	-0.9	2	5.95
VQSKIGSLDNITHVPGGGNK-KNGGGPVHTINDLSGIK-a4-b1	s320f_Tau	reverse_s320f_Tau	intra-protein xl	353	73	280	3864.07	1289.03	3	4.2	1	5.92
FDLKESKVEVQGGGPK-K7-K16	reverse_s320f_Tau	-	intralink	102	111	9	1854.97	619.331	3	-1.3	1	5.9
KIETHKLTFR-AKGADGKTK-a6-b7	s320f_Tau	s320f_Tau	intra-protein xl	375	148	227	2284.28	762.434	3	-4.9	1	5.84
GAAPPGQKGQANATR-KNIIQVKGGGPQHK-a8-b7	s320f_Tau	reverse_s320f_Tau	intra-protein xl	163	168	5	3063.68	766.928	4	3.4	1	5.75
DNIKHVPGGGSVQIVYKPVDLSKVTFK-DGSKPPEGSSPPTKPAPPTK-a23-b4	s320f_Tau	reverse_s320f_Tau	intra-protein xl	317	252	65	5036.67	1008.34	5	-3	3	5.7
CGSKDNIKHVPGGGSVQIVYKPVDLSK-VQSKIGSLDNITHVPGGGNKK-a4-b4	s320f_Tau	s320f_Tau	intra-protein xl	294	353	59	5167.77	1034.56	5	4.3	1	5.7
TPPAPKTPPSSGEPPKSGDR-SEKLDFK-a16-b3	s320f_Tau	s320f_Tau	intra-protein xl	190	343	153	3005.53	752.39	4	-2.3	1	5.68
NGGGPVHTINDLSGIKSQVR-TPPKSPSSAK-a16-b4	reverse_s320f_Tau	s320f_Tau	intra-protein xl	89	234	145	3184.7	637.948	5	4.5	1	5.67
LDPXPVPATQLRSKASSPSKPPTR-KPERTPPTPLSPTR-a14-b1	reverse_s320f_Tau	reverse_s320f_Tau	intra-protein xl	202	218	16	4290.3	1073.58	4	-4.9	2	5.65
SGCKSQVNSLDLKK-ESKVEVQGGGPK-a4-b3	reverse_s320f_Tau	reverse_s320f_Tau	intra-protein xl	152	102	50	2914.52	972.513	3	3.4	2	5.65
DNIKHVPGGGSVQIVYKPVDLSKVTFK-DGSKPPEGSSPPTKPAPPTK-a17-b4	s320f_Tau	reverse_s320f_Tau	intra-protein xl	311	252	59	5036.67	840.453	6	-2.9	1	5.58
YVIEAGHDTKAK-SEKLDFKDR-a10-b7	reverse_s320f_Tau	s320f_Tau	intra-protein xl	57	347	290	2605.35	652.344	4	2.7	1	5.55
VNKLDPMPVPATQLR-DGTGSDDKK-a3-b8	reverse_s320f_Tau	s320f_Tau	intra-protein xl	188	140	48	2737.39	913.473	3	-0.5	1	5.49
HVPGGGSVQIVYKPVDLSK-K19-156	s320f_Tau	-	monolink	317	n/a	-	2135.16	712.729	3	0.2	10	5.49
ASSPSKPPTRVVAVK-ANERFTLKHTEIK-a6-b8	reverse_s320f_Tau	reverse_s320f_Tau	intra-protein xl	208	67	141	3246.8	812.707	4	-3.6	1	5.48
LQTAPVPMPDLKNVKSK-INDKSGCK-a12-b4	s320f_Tau	reverse_s320f_Tau	intra-protein xl	254	148	106	2923.54	731.892	4	-4.4	1	5.43
KNGGGPVHTINDLSGIK-NVKSKIGSTENLK-a1-b3	reverse_s320f_Tau	s320f_Tau	intra-protein xl	73	257	184	3260.79	1087.94	3	4.4	3	5.41
GAAPPGQKGQANATR-HQPGGGKVQIINKK-a8-b13	s320f_Tau	s320f_Tau	intra-protein xl	163	280	117	3063.67	1022.23	3	0.6	2	5.41
TPPAPKTPPSSGEPPKSGDR-KAKGADGK-a6-b1	s320f_Tau	s320f_Tau	intra-protein xl	180	141	39	2913.51	729.386	4	-1.8	2	5.4
VEVQGGGPKHHINGLSGCKFTVK-K23-156	reverse_s320f_Tau	-	monolink	125	n/a	-	2604.35	869.125	3	1.5	1	5.37
DNIKHVPGGGSVQIVYKPVDLSKVTFK-K17-K23	s320f_Tau	-	intralink	311	317	6	3062.68	1021.9	3	-1.9	2	5.36
GAAPPGQKGQANATRIPAK-IPAKTPPAPK-a8-b4	s320f_Tau	s320f_Tau	intra-protein xl	163	174	11	2988.69	997.236	3	-0.6	1	5.32
SGCKSQVNSLDLKK-LNETSGIKSKVNK-a4-b10	reverse_s320f_Tau	reverse_s320f_Tau	intra-protein xl	152	185	33	3117.66	780.422	4	-3.9	1	5.3
KPERTPPTPLSPTRSR-SGCKSQVNSLDLKK-a1-b4	reverse_s320f_Tau	reverse_s320f_Tau	intra-protein xl	218	152	66	3519.89	1174.3	3	1.7	1	5.28
GQANATRIPAKTPPAPK-SGCKSQVNSLDLK-a11-b4	s320f_Tau	reverse_s320f_Tau	intra-protein xl	174	152	22	3289.75	823.446	4	2.5	2	5.26
GGGPQHKLNETSGIK-K15-156	reverse_s320f_Tau	-	monolink	183	n/a	-	1677.87	560.296	3	-1.6	1	5.24
SGCKSQVNSLDLKK-AKGADGKTK-a4-b7	reverse_s320f_Tau	s320f_Tau	intra-protein xl	152	148	4	2575.37	644.85	4	2.4	1	5.09
YVIQVSGGGPVHKINDK-K13-155	reverse_s320f_Tau	-	monolink	144	n/a	-	1965.07	656.03	3	-1.4	1	4.97
LQTAPVPXPDLKNVK-SKASSPSKPPTR-a12-b8	s320f_Tau	reverse_s320f_Tau	intra-protein xl	254	208	46	3045.65	1016.23	3	0.1	1	4.95
IATPRGAAPPGQKGQANATR-TKIATPRGAAPPGQK-a13-b2	s320f_Tau	s320f_Tau	intra-protein xl	163	150	13	3590.96	898.748	4	-3.8	1	4.92
KNGGGPVHTINDLSGIKSQVR-VEVQGGGPKHHINGLSGCK-a1-b9	reverse_s320f_Tau	reverse_s320f_Tau	intra-protein xl	73	111	38	4287.23	858.453	5	-0.3	1	4.91
KNGGGPVHTINDLSGIKSQVR-K17-155	reverse_s320f_Tau	-	monolink	89	n/a	-	2331.26	778.095	3	-3.2	4	4.85
GADGKTKIATPR-TPPKSPSSAKSR-a5-b4	s320f_Tau	s320f_Tau	intra-protein xl	148	234	86	2593.43	865.485	3	5	13	4.78
YVIQVSGGGPVHKINDK-K13-K17	reverse_s320f_Tau	-	intralink	144	148	4	1948.04	650.353	3	-3	1	4.78
FTVKSLDVPKYVIQVSGGGPVHK-LQTAPVPMPDLKNVKSK-a10-b12	reverse_s320f_Tau	s320f_Tau	intra-protein xl	131	254	123	4457.46	1115.37	4	-4.4	1	4.77
LQTAPVPMPDLKNVKSK-TPPAPKTPPSSGEPPK-a12-b6	s320f_Tau	s320f_Tau	intra-protein xl	254	180	74	3589.94	898.494	4	0.4	1	4.76
KNGGGPVHTINDLSGIK-K1-156	reverse_s320f_Tau	-	monolink	73	n/a	-	1861.99	621.671	3	-0.1	2	4.72
QGPPAAGRPTAIKTKGDAGK-GGGPQHKLNETSGIK-a13-b7	reverse_s320f_Tau	reverse_s320f_Tau	intra-protein xl	292	175	117	3579.9	895.983	4	-3.6	1	4.7
FTVKSLDVPKYVIQVSGGGPVHK-CGSLGNIHHKPGGGQVEVK-a4-b10	reverse_s320f_Tau	s320f_Tau	intra-protein xl	125	331	206	4565.42	914.091	5	-1.2	2	4.68
DRVQSKIGSLDNITHVPGGGNK-KLDLSNVQSK-a6-b1	s320f_Tau	s320f_Tau	intra-protein xl	353	281	72	3559.9	594.324	6	0.7	1	4.64
YVIEAGHDTKAKANER-K12-156	reverse_s320f_Tau	-	monolink	59	n/a	-	1956.99	653.338	3	0.5	2	4.61
DGSKPPEGSSPPTKPAPPTKAPIR-TKIATPRGAAPPGQK-a4-b2	reverse_s320f_Tau	s320f_Tau	intra-protein xl	252	150	102	4041.2	1011.31	4	-0.8	2	4.57
QGPPAAGRPTAIKTK-TPPKSPSSAKSR-a13-b4	reverse_s320f_Tau	s320f_Tau	intra-protein xl	292	234	58	2871.59	718.905	4	-1.1	2	4.51
CGSLGNIHHKPGGGQVEVK-DKFDLK-a10-b2	s320f_Tau	reverse_s320f_Tau	intra-protein xl	331	95	236	2875.46	719.872	4	-3.3	1	4.48
GGGPQHKLNETSGIKSK-K17-156	reverse_s320f_Tau	-	monolink	185	n/a	-	1892.99	632.006	3	-0.6	1	4.46
YVIQVSGGGPVHKINDKSGCK-SKVNKLDPXPVPATQLR-a17-b2	reverse_s320f_Tau	reverse_s320f_Tau	intra-protein xl	148	185	37	4289.28	858.863	5	2.5	2	4.42
ESKVEVQGGGPK-VVAVKKPER-a3-b5	reverse_s320f_Tau	reverse_s320f_Tau	intra-protein xl	102	217	115	2376.35	793.124	3	4.4	4	4.4
KPERTPPTPLSPTR-SKDGTGSDDKK-a1-b10	reverse_s320f_Tau	s320f_Tau	intra-protein xl	218	140	78	2850.47	951.164	3	-1.3	1	4.39
YVIQVSGGGPVHKINDKSGCK-SKVNKLDPXPVPATQLR-a13-b2	reverse_s320f_Tau	reverse_s320f_Tau	intra-protein xl	144	185	41	4289.28	858.863	5	2.5	1	4.37
TANAQGKQGPPAAGRPTAIKTK-QGPPAAGRPTAIKTKGDAGK-a7-b15	reverse_s320f_Tau	reverse_s320f_Tau	intra-protein xl	279	294	15	4220.32	1056.09	4	0.6	1	4.34
HHINGLSGCKFTVK-K10-K14	reverse_s320f_Tau	-	intralink	121	125	4	1734.89	579.303	3	-0.6	9	4.3
TDHGAEIVYKSPVVSGDTSPR-FTVKSLDVPK-a10-b4	s320f_Tau	reverse_s320f_Tau	intra-protein xl	395	125	270	3484.81	872.21	4	-0.3	2	4.19
SRLQTAPVPMPDLKNVK-XVSKSKDGTGSDDK-a14-b4	s320f_Tau	s320f_Tau	intra-protein xl	254	130	124	3500.8	876.207	4	3.4	1	4.17
GGGPQHKLNETSGIK-SKASSPSKPPTR-a7-b2	reverse_s320f_Tau	reverse_s320f_Tau	intra-protein xl	175	202	27	2901.52	726.389	4	-2.7	1	3.97
YVIQVSGGGPVHKINDKSGCK-AKANER-a17-b2	reverse_s320f_Tau	reverse_s320f_Tau	intra-protein xl	148	59	89	3067.6	1023.54	3	3.3	1	3.96
HVPGGGSVQIVYKPVDLSKVTFK-IGSTENLKHQPGGGK-a19-b8	s320f_Tau	s320f_Tau	intra-protein xl	317	267	50	4114.21	1372.41	3	-3.9	1	3.94
CGSLGNIHHKPGGGQVEVKSEKLDFK-K26-155	s320f_Tau	-	monolink	347	n/a	-	2975.54	992.854	3	2.5	3	3.93
VVAVKKPERTPPTPLSPTR-SEKLDFKDR-a5-b3	reverse_s320f_Tau	s320f_Tau	intra-protein xl	217	343	126	3346.86	837.722	4	-1.8	1	3.92
IGSTENLKHQPGGGK-SKASSPSKPPTR-a8-b8	s320f_Tau	reverse_s320f_Tau	intra-protein xl	267	208	59	2901.52	726.389	4	-2.7	1	3.92
DNIKHVPGGGSVQIVYKPVDLSK-KIETHKLTFR-a4-b1	s320f_Tau	s320f_Tau	intra-protein xl	298	370	72	3859.12	965.788	4	-4.4	1	3.87
YVIQVSGGGPVHKINDKSGCK-SKVNKLDPXPVPATQLR-a13-b5	reverse_s320f_Tau	reverse_s320f_Tau	intra-protein xl	144	188	44	4289.28	858.863	5	2.5	1	3.86
HVPGGGSVQIVYKPVDLSK-KLDLSNVQSKCGSK-a13-b1	s320f_Tau	s320f_Tau	intra-protein xl	311	281	30	3679.97	1227.67	3	3.5	1	3.81
NGGGPVHTINDLSGIKSQVR-K16-155	reverse_s320f_Tau	-	monolink	89	n/a	-	2203.17	735.399	3	0.2	3	3.8
TANAQGKQGPPAAGRPTAIKTK-AKTDHGAEIVYK-a20-b2	reverse_s320f_Tau	s320f_Tau	intra-protein xl	292	385	93	3630.93	1211.32	3	-4	1	3.76
LQTAPVPXPDLKNVKSK-YVIQVSGGGPVHKINDK-a15-b13	s320f_Tau	reverse_s320f_Tau	intra-protein xl	257	144	113	3829.08	1277.37	3	-1.4	1	3.74
ADSTESGPEESGDETPTQLPSEKLGADTDGEQDQHXTYGGQDK-SKVNKLDPXPVPATQLR-a23-b5	reverse_s320f_Tau	reverse_s320f_Tau	intra-protein xl	398	188	210	6600.05	1321.02	5	5	2	3.73
ENAKAKTDHGAEIVYK-KIETHKLTFR-a6-b6	s320f_Tau	s320f_Tau	intra-protein xl	385	375	10	3182.7	796.682	4	-4.4	1	3.68
VQSKIGSLDNITHVPGGGNKK-VQSKIGSLDNITHVPGGGNK-a20-b4	s320f_Tau	s320f_Tau	intra-protein xl	369	353	16	4306.29	1077.58	4	-2.8	2	3.67
ADSTESGPEESGDETPTQLPSEKLGADTDGEQDQHXTYGGQDKR-SKASSPSKPPTRVVAVK-a43-b2	reverse_s320f_Tau	reverse_s320f_Tau	intra-protein xl	418	202	216	6585.07	1318.02	5	-2.5	5	3.64
AKTDHGAEIVYKSPVVSGDTSPR-KLDLSNVQSKCGSK-a2-b10	s320f_Tau	s320f_Tau	intra-protein xl	385	290	95	4114.1	823.828	5	-0.2	1	3.53
HQPGGGKVQIINKK-INDKSGCK-a7-b4	s320f_Tau	reverse_s320f_Tau	intra-protein xl	274	148	126	2561.37	854.799	3	-0.4	1	3.52
LNETSGIKSKVNK-KLDLSNVQSK-a10-b1	reverse_s320f_Tau	s320f_Tau	intra-protein xl	185	281	96	2685.48	896.168	3	-4.4	1	3.49
SPSSAKSRLQTAPVPXPDLK-SRLQTAPVPXPDLKNVK-a6-b14	s320f_Tau	s320f_Tau	intra-protein xl	240	254	14	4172.25	835.458	5	3.5	1	3.46
KNGGGPVHTINDLSGIKSQVR-SRLQTAPVPMPDLKNVK-a17-b14	reverse_s320f_Tau	s320f_Tau	intra-protein xl	89	254	165	4207.3	1403.44	3	3	3	3.45
VTFKCGSLGNIHHKPGGGQVEVKSEK-K4-156	s320f_Tau	-	monolink	321	n/a	-	2948.51	738.137	4	-1	1	3.43
KNGGGPVHTINDLSGIK-K17-155	reverse_s320f_Tau	-	monolink	89	n/a	-	1861.01	621.343	3	-0.8	1	3.41
LQTAPVPXPDLKNVK-ANERFTLKHTEIK-a12-b8	s320f_Tau	reverse_s320f_Tau	intra-protein xl	254	67	187	3389.83	848.465	4	-2.3	1	3.41
ESKVEVQGGGPK-GADGKTKIATPR-a3-b5	reverse_s320f_Tau	s320f_Tau	intra-protein xl	102	148	46	2565.39	856.136	3	3.7	1	3.35
IGSLDNITHVPGGGNKK-NIIQVKGGGPQHK-a16-b6	s320f_Tau	reverse_s320f_Tau	intra-protein xl	369	168	201	3218.74	1073.92	3	-2.5	1	3.35
KLDLSNVQSKCGSK-ESKVEVQGGGPK-a10-b3	s320f_Tau	reverse_s320f_Tau	intra-protein xl	290	102	188	2914.51	972.512	3	1.7	1	3.33
GQANATRIPAKTPPAPK-AKTDHGAEIVYK-a11-b2	s320f_Tau	s320f_Tau	intra-protein xl	174	385	211	3185.71	1062.91	3	-1.7	1	3.31
YVIQVSGGGPVHKINDKSGCK-VNKLDPXPVPATQLR-a17-b3	reverse_s320f_Tau	reverse_s320f_Tau	intra-protein xl	148	188	40	4074.12	1359.05	3	-3.7	1	3.28
GGGPQHKLNETSGIKSK-GGGPQHKLNETSGIKSK-a7-b7	reverse_s320f_Tau	reverse_s320f_Tau	intra-protein xl	175	175	0	3611.9	1204.97	3	-1.7	1	3.21
DQGGYTXHQDQEGDTDAGLKESPLQTPTEDGSEEPGSETSDAK-SKVNKLDPXPVPATQLR-a20-b5	s320f_Tau	reverse_s320f_Tau	intra-protein xl	44	188	144	6600.05	1321.02	5	5	2	3.12
SKIGSTENLKHQPGGGK-TPPKSPSSAKSR-a2-b10	s320f_Tau	s320f_Tau	intra-protein xl	259	240	19	3116.66	1039.89	3	-0.1	2	3.12
GGGPQHKLNETSGIKSK-SKIGSTENLK-a15-b2	reverse_s320f_Tau	s320f_Tau	intra-protein xl	183	259	76	2950.57	738.651	4	-0.5	1	3.08
CGSKDNIKHVPGGGSVQIVYKPVDLSK-TPSLPTPPTREPKK-a4-b13	s320f_Tau	s320f_Tau	intra-protein xl	294	224	70	4567.43	1142.86	4	-4.6	2	3.05
ESKVEVQGGGPK-SKDGTGSDDK-a3-b2	reverse_s320f_Tau	s320f_Tau	intra-protein xl	102	132	30	2360.15	591.044	4	4.9	1	3.03
LNETSGIKSKVNK-SKIGSTENLK-a10-b2	reverse_s320f_Tau	s320f_Tau	intra-protein xl	185	259	74	2630.44	877.821	3	-4	1	3.03
KNGGGPVHTINDLSGIKSQVR-K1-K17	reverse_s320f_Tau	-	intralink	73	89	16	2314.24	579.567	4	-0.9	2	2.96
VNKLDPXPVPATQLR-KIETHKLTFR-a3-b1	reverse_s320f_Tau	s320f_Tau	intra-protein xl	188	370	182	3103.74	776.942	4	4.3	1	2.96
ADSTESGPEESGDETPTQLPSEKLGADTDGEQDQHMTYGGQDKR-KPERTPPTPLSPTRSR-a43-b1	reverse_s320f_Tau	reverse_s320f_Tau	intra-protein xl	418	218	200	6650.06	1109.35	6	-4	1	2.93
DRVQSKIGSLDNITHVPGGGNK-LNETSGIKSKVNK-a6-b10	s320f_Tau	reverse_s320f_Tau	intra-protein xl	353	185	168	3846.07	962.526	4	3.1	3	2.87
YVIQVSGGGPVHKINDKSGCK-VNKLDPXPVPATQLRSK-a13-b3	reverse_s320f_Tau	reverse_s320f_Tau	intra-protein xl	144	188	44	4289.28	858.863	5	2.5	1	2.84
GAAPPGQKGQANATR-HHINGLSGCKFTVK-a8-b10	s320f_Tau	reverse_s320f_Tau	intra-protein xl	163	121	42	3157.63	790.416	4	3.6	1	2.8
IGSLDNITHVPGGGNKK-NVKSKIGSTENLK-a16-b3	s320f_Tau	s320f_Tau	intra-protein xl	369	257	112	3260.78	1087.93	3	2.7	1	2.76
CGSLGNIHHKPGGGQVEVKSEK-DKFDLKESK-a19-b2	s320f_Tau	reverse_s320f_Tau	intra-protein xl	340	95	245	3563.79	1188.94	3	-4.4	1	2.75
TANAQGKQGPPAAGRPTAIKTK-SGCKSQVNSLDLKK-a20-b13	reverse_s320f_Tau	reverse_s320f_Tau	intra-protein xl	292	161	131	3863.08	966.778	4	3.3	1	2.71
APIRTANAQGKQGPPAAGRPTAIK-YVIQVSGGGPVHKINDK-a11-b13	reverse_s320f_Tau	reverse_s320f_Tau	intra-protein xl	279	144	135	4318.38	864.683	5	2.6	1	2.69
QEFEVMEDHAGTYGLGDRKDQGGYTXHQDQEGDTDAGLK-VQSKIGSLDNITHVPGGGNKK-a19-b20	s320f_Tau	s320f_Tau	intra-protein xl	24	369	345	6630.07	1106.02	6	-3.1	3	2.6
IGSLDNITHVPGGGNKK-VNKLDPXPVPATQLR-a16-b3	s320f_Tau	reverse_s320f_Tau	intra-protein xl	369	188	181	3537.91	1180.31	3	3.8	1	2.47
SRLQTAPVPXPDLKNVK-AKTDHGAEIVYK-a14-b2	s320f_Tau	s320f_Tau	intra-protein xl	254	385	131	3377.8	845.458	4	-0.7	1	2.35
LQTAPVPXPDLKNVKSK-LDLSNVQSKCGSK-a12-b9	s320f_Tau	s320f_Tau	intra-protein xl	254	290	36	3453.84	1152.29	3	4.6	1	2.32
QEFEVXEDHAGTYGLGDRKDQGGYTMHQDQEGDTDAGLK-VQSKIGSLDNITHVPGGGNKK-a19-b20	s320f_Tau	s320f_Tau	intra-protein xl	24	369	345	6630.08	1327.02	5	-2.3	6	2.27
INDKSGCKSQVNSLDLK-NVKSKIGSTENLK-a4-b3	reverse_s320f_Tau	s320f_Tau	intra-protein xl	148	257	109	3459.81	865.961	4	-3	1	2.24
LQTAPVPXPDLKNVKSK-SGCKSQVNSLDLK-a15-b4	s320f_Tau	reverse_s320f_Tau	intra-protein xl	257	152	105	3453.81	1152.28	3	-3.6	1	2.21
KNGGGPVHTINDLSGIKSQVR-SKVNKLDPMPVPATQLR-a17-b2	reverse_s320f_Tau	reverse_s320f_Tau	intra-protein xl	89	185	96	4207.3	1403.44	3	3	5	2.19
CGSLGNIHHKPGGGQVEVK-K19-156	s320f_Tau	-	monolink	340	n/a	-	2129.07	533.274	4	-1.2	1	2.13
SEKLDFKDR-SEKLDFKDR-a7-b7	s320f_Tau	s320f_Tau	intra-protein xl	347	347	0	2411.22	804.749	3	-4.3	3	2.12
NGGGPVHTINDLSGIKSQVR-DKFDLKESK-a16-b2	reverse_s320f_Tau	reverse_s320f_Tau	intra-protein xl	89	95	6	3294.71	1099.25	3	-2	1	2.05
QGPPAAGRPTAIKTKGDAGK-K13-K15	reverse_s320f_Tau	-	intralink	292	294	2	2058.12	687.048	3	-1.5	1	2.02
QEFEVXEDHAGTYGLGDRKDQGGYTMHQDQEGDTDAGLK-VQSKIGSLDNITHVPGGGNKK-a19-b4	s320f_Tau	s320f_Tau	intra-protein xl	24	353	329	6630.08	1327.02	5	-2.3	1	1.82
GAAPPGQKGQANATRIPAK-GGGPQHKLNETSGIKSK-a8-b15	s320f_Tau	reverse_s320f_Tau	intra-protein xl	163	183	20	3706.98	1236.67	3	-2.4	1	1.67
SPSSAKSRLQTAPVPMPDLK-K6-K20	s320f_Tau	-	intralink	240	254	14	2247.18	750.069	3	-4.7	1	1.67
QEFEVMEDHAGTYGLGDRKDQGGYTMHQDQEGDTDAGLK-VQSKIGSLDNITHVPGGGNKK-a19-b20	s320f_Tau	s320f_Tau	intra-protein xl	24	369	345	6614.07	1323.82	5	-4.8	3	1.58
QEFEVMEDHAGTYGLGDRKDQGGYTMHQDQEGDTDAGLK-SPSSAKSRLQTAPVPMPDLK-a19-b6	s320f_Tau	s320f_Tau	intra-protein xl	24	240	216	6575.03	1316.01	5	-4.3	1	1.55
VEVQGGGPKHHINGLSGCK-NIIQVKGGGPQHK-a9-b6	reverse_s320f_Tau	reverse_s320f_Tau	intra-protein xl	111	168	57	3485.82	1162.95	3	-2.2	1	1.48
IGSLDNITHVPGGGNKK-KNIIQVKGGGPQHK-a16-b7	s320f_Tau	reverse_s320f_Tau	intra-protein xl	369	168	201	3346.86	1116.63	3	4.2	1	1.44
GAAPPGQKGQANATR-KNIIQVKGGGPQHK-a8-b1	s320f_Tau	reverse_s320f_Tau	intra-protein xl	163	162	1	3063.68	1022.24	3	5	1	1.41
DGSKPPEGSSPPTKPAPPTK-SKASSPSKPPTRVVAVK-a14-b2	reverse_s320f_Tau	reverse_s320f_Tau	intra-protein xl	262	202	60	3850.09	1284.37	3	2	1	1.34
HHINGLSGCKFTVKSLDVPK-TKIATPRGAAPPGQK-a10-b2	reverse_s320f_Tau	s320f_Tau	intra-protein xl	121	150	29	3866.09	967.532	4	-0.9	1	1.28
VEVQGGGPKHHINGLSGCK-KPERTPPTPLSPTRSR-a9-b1	reverse_s320f_Tau	reverse_s320f_Tau	intra-protein xl	111	218	107	3930.05	983.522	4	-2.4	1	1.25
VTFKCGSLGNIHHKPGGGQVEVK-SLDVPKYVIQVSGGGPVHK-a14-b6	s320f_Tau	reverse_s320f_Tau	intra-protein xl	331	131	200	4565.42	914.091	5	-1.2	1	1.25
IPAKTPPAPKTPPSSGEPPK-KLDLSNVQSKCGSK-a4-b1	s320f_Tau	s320f_Tau	intra-protein xl	174	281	107	3696.97	1233.33	3	-1.6	1	1.1
TANAQGKQGPPAAGRPTAIKTK-KLDLSNVQSKCGSK-a20-b1	reverse_s320f_Tau	s320f_Tau	intra-protein xl	292	281	11	3863.07	1288.7	3	0	1	0.92
TDHGAEIVYKSPVVSGDTSPR-SQVNSLDLKKNIIQVK-a10-b10	s320f_Tau	reverse_s320f_Tau	intra-protein xl	395	162	233	4178.2	836.649	5	-4.2	1	0.9
TANAQGKQGPPAAGRPTAIKTK-KLDLSNVQSKCGSK-a20-b10	reverse_s320f_Tau	s320f_Tau	intra-protein xl	292	290	2	3863.07	1288.7	3	0	1	0.82
VQSKIGSLDNITHVPGGGNK-TPPAPKTPPSSGEPPK-a4-b6	s320f_Tau	s320f_Tau	intra-protein xl	353	180	173	3744.98	937.253	4	3	1	0.76
QEFEVXEDHAGTYGLGDRKDQGGYTMHQDQEGDTDAGLK-KNGGGPVHTINDLSGIKSQVR-a19-b17	s320f_Tau	reverse_s320f_Tau	intra-protein xl	24	89	65	6658.07	1332.62	5	-4.9	1	0.49
QEFEVMEDHAGTYGLGDRKDQGGYTMHQDQEGDTDAGLK-VQSKIGSLDNITHVPGGGNKK-a19-b4	s320f_Tau	s320f_Tau	intra-protein xl	24	353	329	6614.07	1323.82	5	-4.2	2	0.46
NGGGPVHTINDLSGIKSQVR-K16-156	reverse_s320f_Tau	-	monolink	89	n/a	-	2204.16	735.726	3	0.5	1	0.36
LGADTDGEQDQHMTYGGQDKRDGLGYTGAHDEMVEFEQRPEAM-VNKLDPXPVPATQLR-a20-b3	reverse_s320f_Tau	reverse_s320f_Tau	intra-protein xl	418	188	230	6616.06	1103.68	6	4.7	3	0.23
ADSTESGPEESGDETPTQLPSEKLGADTDGEQDQHXTYGGQDK-VNKLDPXPVPATQLRSK-a23-b3	reverse_s320f_Tau	reverse_s320f_Tau	intra-protein xl	398	188	210	6600.05	1321.02	5	5	2	-0.22
TPPSSGEPPKSGDRSGYSSPGSPGTPGSR-LGADTDGEQDQHXTYGGQDKR-a10-b20	s320f_Tau	reverse_s320f_Tau	intra-protein xl	190	418	228	5260.35	1316.1	4	0	1	-0.45

## Sheet: Fig4g_SF2
Id	Protein1	Protein2	XLType	AbsPos1	AbsPos2	deltaAA	Mr	Mz	z	Error_rel[ppm]	nseen	ld-Score
DNIKHVPGGGSVQIVYKPVDLSK-K4-155	s320f_Tau	-	monolink	298	n/a	-	2604.43	869.15	3	-1.3	9	51.23
HQPGGGKVQIINK-K7-155	s320f_Tau	-	monolink	274	n/a	-	1529.87	510.964	3	-1.1	17	49.79
HVPGGGSVQIVYKPVDLSKVTFK-K19-155	s320f_Tau	-	monolink	317	n/a	-	2609.46	653.372	4	-0.9	5	49.57
CGSLGNIHHKPGGGQVEVKSEK-K19-155	s320f_Tau	-	monolink	340	n/a	-	2472.25	619.071	4	-1.9	4	48.46
HQPGGGKVQIINK-K7-156	s320f_Tau	-	monolink	274	n/a	-	1530.85	511.291	3	-1.5	4	47.5
LDLSNVQSKCGSK-K9-155	s320f_Tau	-	monolink	290	n/a	-	1589.81	530.944	3	-1.8	1	46.13
CGSLGNIHHKPGGGQVEVKSEK-K19-156	s320f_Tau	-	monolink	340	n/a	-	2473.24	825.421	3	0.4	14	45.58
DNIKHVPGGGSVQIVYKPVDLSK-K4-156	s320f_Tau	-	monolink	298	n/a	-	2605.41	869.478	3	-0.3	4	44.94
KLDLSNVQSKCGSK-K10-155	s320f_Tau	-	monolink	290	n/a	-	1717.9	573.642	3	-1.6	2	44.77
HVPGGGSVQIVYKPVDLSK-K13-156	s320f_Tau	-	monolink	311	n/a	-	2135.16	712.729	3	0.4	74	44.64
HVPGGGSVQIVYKPVDLSK-K13-155	s320f_Tau	-	monolink	311	n/a	-	2134.18	712.399	3	-2.6	219	44.48
VQIINKK-LDFKDR-a6-b4	s320f_Tau	s320f_Tau	intra-protein xl	280	347	67	1772.02	444.012	4	-2.3	2	44.3
CGSLGNIHHKPGGGQVEVK-K10-155	s320f_Tau	-	monolink	331	n/a	-	2128.09	533.029	4	0	6	43.42
HVPGGGSVQIVYKPVDLSKVTFK-K13-K19	s320f_Tau	-	intralink	311	317	6	2592.43	865.151	3	-0.8	109	43.14
VQSKIGSLDNITHVPGGGNK-SEKLDFKDR-a4-b3	s320f_Tau	s320f_Tau	intra-protein xl	353	343	10	3294.72	824.687	4	-1.2	3	41.03
KLDLSNVQSKCGSK-K10-156	s320f_Tau	-	monolink	290	n/a	-	1718.89	573.971	3	0.8	8	40.92
CGSLGNIHHKPGGGQVEVK-K10-156	s320f_Tau	-	monolink	331	n/a	-	2129.07	710.698	3	0.1	24	40.69
IGSLDNITHVPGGGNKK-K16-155	s320f_Tau	-	monolink	369	n/a	-	1861	621.342	3	-2.2	406	40.26
HQPGGGKVQIINK-SKIGSTENLK-a7-b2	s320f_Tau	s320f_Tau	intra-protein xl	274	259	15	2588.43	518.693	5	-0.9	8	40.2
IGSTENLKHQPGGGK-K8-155	s320f_Tau	-	monolink	267	n/a	-	1676.88	559.969	3	-2.1	18	40.01
VQSKIGSLDNITHVPGGGNK-SEKLDFK-a4-b3	s320f_Tau	s320f_Tau	intra-protein xl	353	343	10	3023.59	605.726	5	0.1	7	39.99
VQSKIGSLDNITHVPGGGNK-K4-155	s320f_Tau	-	monolink	353	n/a	-	2175.16	726.062	3	-1.4	78	39.97
CGSKDNIKHVPGGGSVQIVYKPVDLSK-K4-K8	s320f_Tau	-	intralink	294	298	4	3019.58	1007.53	3	-0.9	2	39.89
LDLSNVQSKCGSKDNIK-K13-156	s320f_Tau	-	monolink	294	n/a	-	2061.04	688.021	3	-1.3	2	39.78
IGSTENLKHQPGGGK-VQIINKK-a8-b6	s320f_Tau	s320f_Tau	intra-protein xl	267	280	13	2501.4	501.287	5	-0.4	2	39.74
IGSLDNITHVPGGGNKK-K16-156	s320f_Tau	-	monolink	369	n/a	-	1861.99	621.672	3	1.7	165	39.74
HQPGGGKVQIINK-KLDLSNVQSK-a7-b1	s320f_Tau	s320f_Tau	intra-protein xl	274	281	7	2643.46	529.7	5	-4.1	2	39.73
KIETHKLTFR-K6-155	s320f_Tau	-	monolink	375	n/a	-	1426.83	476.617	3	-2.8	1	38.77
HQPGGGKVQIINKK-K7-156	s320f_Tau	-	monolink	274	n/a	-	1658.95	553.99	3	-0.5	3	38.7
KLDLSNVQSK-LDFKDR-a1-b4	s320f_Tau	s320f_Tau	intra-protein xl	281	347	66	2061.11	516.285	4	-1	2	38.39
LDLSNVQSKCGSKDNIK-K9-K13	s320f_Tau	-	intralink	290	294	4	2043.03	682.017	3	-1.2	2	38.15
KLDLSNVQSK-K10-156	s320f_Tau	-	monolink	290	n/a	-	1286.7	429.91	3	-2.3	1	38.12
CGSLGNIHHKPGGGQVEVKSEKLDFK-K19-K22	s320f_Tau	-	intralink	340	343	3	2958.5	987.175	3	0	3	37.88
VQSKIGSLDNITHVPGGGNKK-K4-155	s320f_Tau	-	monolink	353	n/a	-	2303.26	576.822	4	-1.5	9	37.73
IGSTENLKHQPGGGK-KLDLSNVQSK-a8-b1	s320f_Tau	s320f_Tau	intra-protein xl	267	281	14	2790.48	931.169	3	-1.8	9	37.6
KLDLSNVQSK-SEKLDFK-a1-b3	s320f_Tau	s320f_Tau	intra-protein xl	281	343	62	2134.15	534.546	4	-0.5	4	37.51
HQPGGGKVQIINKK-K7-155	s320f_Tau	-	monolink	274	n/a	-	1657.96	553.662	3	-1.5	1	37.42
KLDLSNVQSKCGSK-K10-K14	s320f_Tau	-	intralink	290	294	4	1700.88	567.966	3	-0.5	4	37.38
IGSLDNITHVPGGGNKKIETHK-K16-K17	s320f_Tau	-	intralink	369	370	1	2452.31	818.443	3	-0.6	19	37.29
IGSLDNITHVPGGGNKK-K17-155	s320f_Tau	-	monolink	370	n/a	-	1861	621.343	3	-1.7	89	37.29
HVPGGGSVQIVYKPVDLSK-VQIINKK-a13-b6	s320f_Tau	s320f_Tau	intra-protein xl	311	280	31	2958.69	740.681	4	0.2	2	37.26
KLDLSNVQSKCGSK-SKIGSTENLK-a10-b2	s320f_Tau	s320f_Tau	intra-protein xl	290	259	31	2776.46	926.495	3	-0.8	1	37.18
KIETHK-LDFKDR-a1-b4	s320f_Tau	s320f_Tau	intra-protein xl	370	347	23	1684.91	562.645	3	-1.3	2	37.09
VTFKCGSLGNIHHKPGGGQVEVK-K4-155	s320f_Tau	-	monolink	321	n/a	-	2603.36	651.849	4	-1	22	37.06
LDLSNVQSKCGSK-VQIINKK-a9-b6	s320f_Tau	s320f_Tau	intra-protein xl	290	280	10	2414.32	604.587	4	-0.9	2	36.99
SEKLDFKDR-K3-156	s320f_Tau	-	monolink	343	n/a	-	1292.66	431.894	3	-1.6	2	36.91
VQSKIGSLDNITHVPGGGNK-K4-156	s320f_Tau	-	monolink	353	n/a	-	2176.15	726.39	3	-0.4	92	36.52
CGSLGNIHHKPGGGQVEVK-VQIINKK-a10-b6	s320f_Tau	s320f_Tau	intra-protein xl	331	280	51	2952.6	985.207	3	0.3	3	36.49
SKIGSTENLK-LDFKDR-a2-b4	s320f_Tau	s320f_Tau	intra-protein xl	259	347	88	2006.07	669.697	3	-0.8	2	36.36
IGSTENLKHQPGGGK-K8-156	s320f_Tau	-	monolink	267	n/a	-	1677.87	560.296	3	-1.6	15	36.33
IGSLDNITHVPGGGNKK-K17-156	s320f_Tau	-	monolink	370	n/a	-	1861.99	621.672	3	0.9	36	36.14
VQSKIGSLDNITHVPGGGNK-KIETHK-a4-b1	s320f_Tau	s320f_Tau	intra-protein xl	353	370	17	2912.57	971.864	3	-1	5	36.07
VTFKCGSLGNIHHKPGGGQVEVK-LDFKDR-a4-b4	s320f_Tau	s320f_Tau	intra-protein xl	321	347	26	3378.75	564.133	6	-0.4	2	35.99
CGSLGNIHHKPGGGQVEVK-KIETHK-a10-b1	s320f_Tau	s320f_Tau	intra-protein xl	331	370	39	2865.49	717.38	4	-1	1	35.88
IGSLDNITHVPGGGNKK-IETHKLTFR-a16-b5	s320f_Tau	s320f_Tau	intra-protein xl	369	375	6	2987.62	747.912	4	-0.5	2	35.87
IGSTENLKHQPGGGK-KLDLSNVQSKCGSK-a8-b10	s320f_Tau	s320f_Tau	intra-protein xl	267	290	23	3222.66	1075.23	3	-1.1	2	35.79
KLDLSNVQSK-CGSKDNIK-a1-b4	s320f_Tau	s320f_Tau	intra-protein xl	281	294	13	2189.14	548.292	4	-0.3	4	35.77
VQSKIGSLDNITHVPGGGNKK-LDFKDR-a4-b4	s320f_Tau	s320f_Tau	intra-protein xl	353	347	6	3078.65	616.737	5	0.1	2	35.77
DNIKHVPGGGSVQIVYKPVDLSK-KLDLSNVQSKCGSK-a4-b10	s320f_Tau	s320f_Tau	intra-protein xl	298	290	8	4150.2	1038.56	4	-1.3	3	35.67
IETHKLTFR-K5-156	s320f_Tau	-	monolink	375	n/a	-	1299.72	434.247	3	-1.6	1	35.67
KIETHKLTFR-K6-156	s320f_Tau	-	monolink	375	n/a	-	1427.81	476.945	3	-2.1	2	35.36
VTFKCGSLGNIHHKPGGGQVEVK-SEKLDFK-a4-b3	s320f_Tau	s320f_Tau	intra-protein xl	321	343	22	3451.79	691.366	5	-0.6	3	35.22
CGSLGNIHHKPGGGQVEVKSEKLDFK-K19-155	s320f_Tau	-	monolink	340	n/a	-	2975.52	992.849	3	-2.2	3	35.14
SKIGSTENLK-SEKLDFK-a2-b3	s320f_Tau	s320f_Tau	intra-protein xl	259	343	84	2079.11	694.044	3	-0.3	1	35.08
DNIKHVPGGGSVQIVYKPVDLSK-VQIINKK-a4-b6	s320f_Tau	s320f_Tau	intra-protein xl	298	280	18	3428.94	686.796	5	-0.2	2	34.88
IGSLDNITHVPGGGNKK-SEKLDFK-a16-b3	s320f_Tau	s320f_Tau	intra-protein xl	369	343	26	2709.43	904.152	3	-0.3	4	34.81
SKIGSTENLK-VQIINKK-a2-b6	s320f_Tau	s320f_Tau	intra-protein xl	259	280	21	2055.19	686.072	3	-0.5	2	34.78
IETHKLTFR-K5-155	s320f_Tau	-	monolink	375	n/a	-	1298.73	433.919	3	-3.1	1	34.69
CGSKDNIK-VQIINKK-a4-b6	s320f_Tau	s320f_Tau	intra-protein xl	294	280	14	1900.04	476.019	4	-0.7	1	34.52
SEKLDFKDR-K3-155	s320f_Tau	-	monolink	343	n/a	-	1291.67	431.566	3	-3	6	34.13
HVPGGGSVQIVYKPVDLSK-SEKLDFK-a13-b3	s320f_Tau	s320f_Tau	intra-protein xl	311	343	32	2982.6	746.659	4	-1	1	33.87
CGSLGNIHHKPGGGQVEVKSEK-K22-156	s320f_Tau	-	monolink	343	n/a	-	2473.24	825.42	3	-1.1	2	33.7
SEKLDFK-VQIINKK-a3-b6	s320f_Tau	s320f_Tau	intra-protein xl	343	280	63	1845.06	462.273	4	-0.4	2	33.58
IGSTENLKHQPGGGK-KIETHK-a8-b1	s320f_Tau	s320f_Tau	intra-protein xl	267	370	103	2414.29	805.771	3	-0.6	2	33.44
IGSTENLKHQPGGGK-CGSKDNIK-a8-b4	s320f_Tau	s320f_Tau	intra-protein xl	267	294	27	2580.3	861.107	3	-0.1	2	33.42
CGSLGNIHHKPGGGQVEVKSEK-K19-K22	s320f_Tau	-	intralink	340	343	3	2455.23	819.417	3	0.3	2	33.28
VTFKCGSLGNIHHKPGGGQVEVK-KLDLSNVQSK-a4-b1	s320f_Tau	s320f_Tau	intra-protein xl	321	281	40	3716.96	930.249	4	-0.8	3	33.28
HVPGGGSVQIVYKPVDLSK-CGSKDNIK-a13-b4	s320f_Tau	s320f_Tau	intra-protein xl	311	294	17	3037.59	760.405	4	-0.9	2	33.04
DRVQSKIGSLDNITHVPGGGNK-K6-155	s320f_Tau	-	monolink	353	n/a	-	2446.29	612.581	4	-1.3	1	33.03
IGSLDNITHVPGGGNKK-LDFKDR-a16-b4	s320f_Tau	s320f_Tau	intra-protein xl	369	347	22	2636.39	528.286	5	-1	3	32.87
IGSLDNITHVPGGGNKK-SEKLDFKDR-a16-b7	s320f_Tau	s320f_Tau	intra-protein xl	369	347	22	2980.56	746.148	4	-0.8	3	32.8
VTFKCGSLGNIHHKPGGGQVEVK-K4-156	s320f_Tau	-	monolink	321	n/a	-	2604.35	869.123	3	-0.8	41	32.79
VQSKIGSLDNITHVPGGGNKK-K4-156	s320f_Tau	-	monolink	353	n/a	-	2304.24	577.069	4	-0.4	30	32.75
DNIKHVPGGGSVQIVYKPVDLSK-IGSTENLKHQPGGGK-a4-b8	s320f_Tau	s320f_Tau	intra-protein xl	298	267	31	4109.19	1370.74	3	0.4	4	32.73
CGSLGNIHHKPGGGQVEVKSEK-LDFKDR-a19-b4	s320f_Tau	s320f_Tau	intra-protein xl	340	347	7	3247.64	650.536	5	-0.3	1	32.43
KIETHKLTFR-K1-K6	s320f_Tau	-	intralink	370	375	5	1409.8	470.942	3	-1.4	3	32.35
LDLSNVQSKCGSK-KIETHK-a9-b1	s320f_Tau	s320f_Tau	intra-protein xl	290	370	80	2327.21	776.746	3	-1	1	32.28
VTFKCGSLGNIHHKPGGGQVEVK-SKIGSTENLK-a4-b2	s320f_Tau	s320f_Tau	intra-protein xl	321	259	62	3661.92	916.488	4	-0.9	2	32.08
CGSKDNIK-SEKLDFK-a4-b3	s320f_Tau	s320f_Tau	intra-protein xl	294	343	49	1923.96	642.328	3	-1.1	1	31.94
CGSLGNIHHKPGGGQVEVK-SEKLDFKDR-a10-b3	s320f_Tau	s320f_Tau	intra-protein xl	331	343	12	3247.64	812.918	4	0.4	3	31.82
DRVQSKIGSLDNITHVPGGGNK-K6-156	s320f_Tau	-	monolink	353	n/a	-	2447.28	612.827	4	-0.5	1	31.73
HQPGGGKVQIINK-LDLSNVQSKCGSK-a7-b9	s320f_Tau	s320f_Tau	intra-protein xl	274	290	16	2947.55	737.896	4	-0.3	2	31.62
VQSKIGSLDNITHVPGGGNK-K4-K20	s320f_Tau	-	intralink	353	369	16	2158.14	720.388	3	0.4	6	31.55
CGSLGNIHHKPGGGQVEVKSEK-K10-K19	s320f_Tau	-	intralink	331	340	9	2455.23	819.417	3	0	39	31.44
LDLSNVQSKCGSK-SKIGSTENLK-a9-b2	s320f_Tau	s320f_Tau	intra-protein xl	290	259	31	2648.37	663.1	4	0.4	2	31.34
VQSKIGSLDNITHVPGGGNKK-K4-K20	s320f_Tau	-	intralink	353	369	16	2286.24	763.086	3	0.9	4	31.27
IGSTENLKHQPGGGK-SEKLDFK-a8-b3	s320f_Tau	s320f_Tau	intra-protein xl	267	343	76	2525.31	842.778	3	-1.3	2	31.21
DNIKHVPGGGSVQIVYKPVDLSK-KLDLSNVQSK-a4-b1	s320f_Tau	s320f_Tau	intra-protein xl	298	281	17	3718.03	1240.35	3	-0.4	7	31.14
VQSKIGSLDNITHVPGGGNKK-SEKLDFKDR-a4-b7	s320f_Tau	s320f_Tau	intra-protein xl	353	347	6	3422.81	856.711	4	-0.8	2	31.08
VQSKIGSLDNITHVPGGGNK-SKIGSTENLK-a4-b2	s320f_Tau	s320f_Tau	intra-protein xl	353	259	94	3233.73	809.44	4	1.5	2	30.79
LDLSNVQSKCGSKDNIK-K9-156	s320f_Tau	-	monolink	290	n/a	-	2061.04	688.021	3	-0.9	1	30.73
IGSLDNITHVPGGGNKKIETHK-K17-156	s320f_Tau	-	monolink	370	n/a	-	2470.31	495.07	5	-2.1	7	30.55
LDLSNVQSKCGSKDNIK-K9-155	s320f_Tau	-	monolink	290	n/a	-	2060.05	687.693	3	-1.9	2	30.48
KLDLSNVQSKCGSK-HQPGGGKVQIINK-a10-b7	s320f_Tau	s320f_Tau	intra-protein xl	290	274	16	3075.65	616.137	5	-1.4	1	30.3
HVPGGGSVQIVYKPVDLSK-K13-K19	s320f_Tau	-	intralink	311	317	6	2117.15	706.724	3	-1.5	1	29.86
DNIKHVPGGGSVQIVYKPVDLSK-K4-K17	s320f_Tau	-	intralink	298	311	13	2587.4	647.858	4	-0.2	2	29.84
CGSLGNIHHKPGGGQVEVK-SEKLDFK-a10-b3	s320f_Tau	s320f_Tau	intra-protein xl	331	343	12	2976.51	993.178	3	-1.1	2	29.78
VQIINKK-VQIINKK-a6-b6	s320f_Tau	s320f_Tau	intra-protein xl	280	280	0	1821.14	456.294	4	-0.8	1	29.66
IGSTENLKHQPGGGKVQIINK-K15-156	s320f_Tau	-	monolink	274	n/a	-	2373.3	594.333	4	-0.7	3	29.28
VQSKIGSLDNITHVPGGGNK-LDFKDR-a4-b4	s320f_Tau	s320f_Tau	intra-protein xl	353	347	6	2950.55	591.118	5	0.2	4	29.27
CGSLGNIHHKPGGGQVEVKSEK-VQSKIGSLDNITHVPGGGNK-a19-b4	s320f_Tau	s320f_Tau	intra-protein xl	340	353	13	4475.29	896.066	5	-1.4	2	29.21
HVPGGGSVQIVYKPVDLSKVTFK-VQIINKK-a19-b6	s320f_Tau	s320f_Tau	intra-protein xl	317	280	37	3433.97	687.801	5	-0.7	1	29.07
CGSLGNIHHKPGGGQVEVKSEK-LDFKDR-a10-b4	s320f_Tau	s320f_Tau	intra-protein xl	331	347	16	3247.64	542.281	6	-0.3	1	29.04
SEKLDFKDR-HTEIKK-a3-b5	s320f_Tau	reverse_s320f_Tau	intra-protein xl	343	72	271	2029.08	508.278	4	-1.4	1	28.71
VTFKCGSLGNIHHKPGGGQVEVK-K4-K14	s320f_Tau	-	intralink	321	331	10	2586.34	863.12	3	-0.9	6	28.61
VQSKIGSLDNITHVPGGGNK-KLDLSNVQSK-a4-b1	s320f_Tau	s320f_Tau	intra-protein xl	353	281	72	3288.77	823.2	4	0.1	2	28.52
CGSLGNIHHKPGGGQVEVKSEKLDFK-K22-156	s320f_Tau	-	monolink	343	n/a	-	2976.52	993.182	3	3.5	2	28.43
SEKLDFK-KIETHK-a3-b1	s320f_Tau	s320f_Tau	intra-protein xl	343	370	27	1757.95	586.993	3	-1.1	2	28.34
VQIINKK-KIETHK-a6-b1	s320f_Tau	s320f_Tau	intra-protein xl	280	370	90	1734.04	434.517	4	-1.3	2	27.94
VTFKCGSLGNIHHKPGGGQVEVKSEK-K4-K23	s320f_Tau	-	intralink	321	340	19	2930.51	977.843	3	-0.8	3	27.58
VTFKCGSLGNIHHKPGGGQVEVK-SQVNSLDLKK-a4-b9	s320f_Tau	reverse_s320f_Tau	intra-protein xl	321	161	160	3716.96	744.4	5	-2.1	2	27.56
CGSLGNIHHKPGGGQVEVK-LDLSNVQSKCGSK-a10-b9	s320f_Tau	s320f_Tau	intra-protein xl	331	290	41	3545.77	1182.93	3	-1.3	2	27.43
VQSKIGSLDNITHVPGGGNK-HQPGGGKVQIINK-a4-b7	s320f_Tau	s320f_Tau	intra-protein xl	353	274	79	3532.91	884.236	4	-0.2	2	27.41
SKIGSTENLKHQPGGGK-K2-156	s320f_Tau	-	monolink	259	n/a	-	1892.99	632.006	3	-1.2	3	27.25
VTFKCGSLGNIHHKPGGGQVEVK-SEKLDFK-a14-b3	s320f_Tau	s320f_Tau	intra-protein xl	331	343	12	3451.79	576.307	6	0.2	1	26.64
SKIGSTENLKHQPGGGK-K10-155	s320f_Tau	-	monolink	267	n/a	-	1892.01	631.678	3	-1.5	1	26.06
CGSKDNIKHVPGGGSVQIVYKPVDLSK-FTVKSLDVPK-a4-b4	s320f_Tau	reverse_s320f_Tau	intra-protein xl	294	125	169	4152.21	1039.06	4	-4	1	26.05
CGSLGNIHHKPGGGQVEVK-KLDLSNVQSKCGSK-a10-b10	s320f_Tau	s320f_Tau	intra-protein xl	331	290	41	3673.86	919.474	4	-0.8	1	25.98
VTFKCGSLGNIHHKPGGGQVEVK-IGSTENLKHQPGGGK-a4-b8	s320f_Tau	s320f_Tau	intra-protein xl	321	267	54	4108.13	1028.04	4	0.2	1	25.95
CGSLGNIHHKPGGGQVEVK-IGSLDNITHVPGGGNKK-a10-b16	s320f_Tau	s320f_Tau	intra-protein xl	331	369	38	3816.96	764.401	5	-1.5	4	25.68
VTFKCGSLGNIHHKPGGGQVEVK-HVPGGGSVQIVYKPVDLSK-a4-b13	s320f_Tau	s320f_Tau	intra-protein xl	321	311	10	4565.42	914.092	5	-0.4	9	25.64
HVPGGGSVQIVYKPVDLSK-HQPGGGKVQIINK-a13-b7	s320f_Tau	s320f_Tau	intra-protein xl	311	274	37	3491.92	699.393	5	-0.3	1	25.53
VTFKCGSLGNIHHKPGGGQVEVK-KIETHK-a4-b1	s320f_Tau	s320f_Tau	intra-protein xl	321	370	49	3340.77	836.201	4	0.2	1	25.51
IGSLDNITHVPGGGNKK-HQPGGGKVQIINK-a16-b7	s320f_Tau	s320f_Tau	intra-protein xl	369	274	95	3218.75	805.695	4	-1	2	25.51
VQSKIGSLDNITHVPGGGNK-LDLSNVQSKCGSK-a4-b9	s320f_Tau	s320f_Tau	intra-protein xl	353	290	63	3592.85	899.22	4	-1.2	1	25.45
CGSLGNIHHKPGGGQVEVK-HVPGGGSVQIVYKPVDLSK-a10-b13	s320f_Tau	s320f_Tau	intra-protein xl	331	311	20	4090.14	819.036	5	0.1	3	25.22
CGSLGNIHHKPGGGQVEVK-LDFKDR-a10-b4	s320f_Tau	s320f_Tau	intra-protein xl	331	347	16	2903.47	726.876	4	0.1	1	25
CGSLGNIHHKPGGGQVEVKSEK-IGSLDNITHVPGGGNKK-a19-b16	s320f_Tau	s320f_Tau	intra-protein xl	340	369	29	4161.14	1041.29	4	-0.4	1	24.97
VQIINKKLDLSNVQSK-K7-156	s320f_Tau	-	monolink	281	n/a	-	1982.14	496.543	4	-1.2	1	24.92
VTFKCGSLGNIHHKPGGGQVEVK-VQSKIGSLDNITHVPGGGNK-a4-b4	s320f_Tau	s320f_Tau	intra-protein xl	321	353	32	4606.41	1152.61	4	0.8	2	24.52
HQPGGGKVQIINK-CGSKDNIK-a7-b4	s320f_Tau	s320f_Tau	intra-protein xl	274	294	20	2433.28	812.101	3	-0.3	3	24.38
VQSKIGSLDNITHVPGGGNK-CGSLGNIHHKPGGGQVEVK-a4-b10	s320f_Tau	s320f_Tau	intra-protein xl	353	331	22	4131.12	827.232	5	-1.3	1	24.31
HQPGGGKVQIINK-HQPGGGKVQIINK-a7-b7	s320f_Tau	s320f_Tau	intra-protein xl	274	274	0	2887.61	722.91	4	-1.4	1	24.24
CGSLGNIHHKPGGGQVEVKSEK-K22-155	s320f_Tau	-	monolink	343	n/a	-	2472.25	825.09	3	-3.7	2	24.01
HVPGGGSVQIVYKPVDLSK-KLDLSNVQSK-a13-b1	s320f_Tau	s320f_Tau	intra-protein xl	311	281	30	3247.78	812.953	4	-0.4	3	23.98
SKIGSTENLKHQPGGGK-K2-K10	s320f_Tau	-	intralink	259	267	8	1874.99	626.003	3	0.4	3	23.73
HVPGGGSVQIVYKPVDLSKVTFK-DGSKPPEGSSPPTKPAPPTK-a13-b4	s320f_Tau	reverse_s320f_Tau	intra-protein xl	311	252	59	4566.42	653.354	7	-3.5	8	23.62
VTFKCGSLGNIHHKPGGGQVEVK-CGSKDNIK-a4-b4	s320f_Tau	s320f_Tau	intra-protein xl	321	294	27	3506.77	1169.93	3	-2.4	2	23.48
HQPGGGKVQIINK-K7-K13	s320f_Tau	-	intralink	274	280	6	1512.84	505.288	3	-0.7	2	23.46
VQSKIGSLDNITHVPGGGNK-HVPGGGSVQIVYKPVDLSK-a4-b13	s320f_Tau	s320f_Tau	intra-protein xl	353	311	42	4137.21	828.451	5	-2	2	23.1
VQSKIGSLDNITHVPGGGNKK-SEKLDFK-a4-b3	s320f_Tau	s320f_Tau	intra-protein xl	353	343	10	3151.69	788.929	4	-0.7	1	22.92
VQSKIGSLDNITHVPGGGNK-SQVNSLDLKK-a4-b9	s320f_Tau	reverse_s320f_Tau	intra-protein xl	353	161	192	3288.76	823.199	4	-1	1	22.77
CGSLGNIHHKPGGGQVEVK-SKIGSTENLK-a10-b2	s320f_Tau	s320f_Tau	intra-protein xl	331	259	72	3186.65	797.669	4	0.2	1	22.71
CGSLGNIHHKPGGGQVEVK-IGSTENLKHQPGGGK-a10-b8	s320f_Tau	s320f_Tau	intra-protein xl	331	267	64	3632.84	909.219	4	-1.1	2	22.66
IGSLDNITHVPGGGNKK-SEKLDFKDR-a16-b3	s320f_Tau	s320f_Tau	intra-protein xl	369	343	26	2980.56	597.12	5	-0.7	1	22.56
KLDLSNVQSK-SKIGSTENLK-a1-b2	s320f_Tau	s320f_Tau	intra-protein xl	281	259	22	2344.28	587.078	4	-1.5	3	22.56
CGSKDNIKHVPGGGSVQIVYKPVDLSK-K4-156	s320f_Tau	-	monolink	294	n/a	-	3037.59	608.525	5	-0.9	4	22.37
NVKSKIGSTENLK-K5-156	s320f_Tau	-	monolink	259	n/a	-	1572.87	525.298	3	-1.3	2	22.23
CGSLGNIHHKPGGGQVEVKSEKLDFK-K10-K22	s320f_Tau	-	intralink	331	343	12	2958.5	987.174	3	-1.7	1	21.78
LDLSNVQSKCGSKDNIK-VQIINKK-a13-b6	s320f_Tau	s320f_Tau	intra-protein xl	294	280	14	2884.57	722.15	4	-0.5	1	21.53
IGSTENLKHQPGGGK-K8-K15	s320f_Tau	-	intralink	267	274	7	1659.86	554.293	3	-1.6	5	21.45
SEKLDFKDR-K7-156	s320f_Tau	-	monolink	347	n/a	-	1292.66	431.894	3	-1.6	1	21.19
TPPKSPSSAK-ENAKAK-a4-b4	s320f_Tau	s320f_Tau	intra-protein xl	234	383	149	1795.97	450	4	0.6	1	21.16
VQSKIGSLDNITHVPGGGNKK-K4-K21	s320f_Tau	-	intralink	353	370	17	2286.23	763.085	3	-1.3	1	21.03
HQPGGGKVQIINKK-K7-K13	s320f_Tau	-	intralink	274	280	6	1640.93	547.986	3	-0.7	4	20.99
HVPGGGSVQIVYKPVDLSK-LDLSNVQSKCGSK-a13-b9	s320f_Tau	s320f_Tau	intra-protein xl	311	290	21	3551.87	888.975	4	0.4	1	20.75
HVPGGGSVQIVYKPVDLSKVTFK-CGSLGNIHHKPGGGQVEVK-a19-b10	s320f_Tau	s320f_Tau	intra-protein xl	317	331	14	4565.44	653.213	7	3.7	5	20.74
HVPGGGSVQIVYKPVDLSK-K19-155	s320f_Tau	-	monolink	317	n/a	-	2134.18	712.401	3	-0.2	14	20.59
IGSLDNITHVPGGGNKKIETHK-K16-K22	s320f_Tau	-	intralink	369	375	6	2452.3	614.084	4	-1.2	7	20.55
SQVNSLDLKK-VQIINKK-a9-b6	reverse_s320f_Tau	s320f_Tau	intra-protein xl	161	280	119	2110.24	528.567	4	1.1	1	20.48
KLDLSNVQSKCGSK-NVKSKIGSTENLK-a10-b5	s320f_Tau	s320f_Tau	intra-protein xl	290	259	31	3117.66	780.424	4	-2.4	3	20.44
CGSLGNIHHKPGGGQVEVK-SEKLDFKDR-a10-b7	s320f_Tau	s320f_Tau	intra-protein xl	331	347	16	3247.64	812.918	4	0.4	1	20.41
DGSKPPEGSSPPTKPAPPTK-IGSTENLKHQPGGGK-a4-b8	reverse_s320f_Tau	s320f_Tau	intra-protein xl	252	267	15	3633.85	909.47	4	-3.9	2	20.37
CGSKDNIKHVPGGGSVQIVYKPVDLSK-K8-156	s320f_Tau	-	monolink	298	n/a	-	3037.6	1013.54	3	4.3	1	20.18
CGSLGNIHHKPGGGQVEVK-CGSKDNIK-a10-b4	s320f_Tau	s320f_Tau	intra-protein xl	331	294	37	3031.49	1011.51	3	-0.5	2	20.06
SQVNSLDLKK-INDKSGCK-a9-b4	reverse_s320f_Tau	reverse_s320f_Tau	intra-protein xl	161	148	13	2189.13	438.834	5	-3	4	19.75
DNIKHVPGGGSVQIVYKPVDLSKVTFK-K4-K17	s320f_Tau	-	intralink	298	311	13	3062.68	766.678	4	-0.1	2	19.57
DNIKHVPGGGSVQIVYKPVDLSK-VTFKCGSLGNIHHKPGGGQVEVK-a17-b4	s320f_Tau	s320f_Tau	intra-protein xl	311	321	10	5035.68	840.289	6	2.7	1	19.56
IGSTENLKHQPGGGK-SQVNSLDLKK-a8-b9	s320f_Tau	reverse_s320f_Tau	intra-protein xl	267	161	106	2790.49	559.105	5	-0.2	5	19.48
DGSKPPEGSSPPTKPAPPTK-KLDLSNVQSKCGSK-a14-b10	reverse_s320f_Tau	s320f_Tau	intra-protein xl	262	290	28	3674.87	919.724	4	-4.5	1	19.41
LDFKDRVQSK-K10-156	s320f_Tau	-	monolink	353	n/a	-	1390.74	464.589	3	-1	1	19.39
CGSLGNIHHKPGGGQVEVKSEK-K10-156	s320f_Tau	-	monolink	331	n/a	-	2473.24	619.317	4	-0.5	1	19.32
DNIKHVPGGGSVQIVYKPVDLSKVTFK-K4-K23	s320f_Tau	-	intralink	298	317	19	3062.68	766.678	4	0.1	3	19.28
IGSLDNITHVPGGGNKK-SKIGSTENLK-a16-b2	s320f_Tau	s320f_Tau	intra-protein xl	369	259	110	2919.57	584.921	5	-0.6	1	19.26
DGSKPPEGSSPPTKPAPPTK-CGSLGNIHHKPGGGQVEVK-a14-b10	reverse_s320f_Tau	s320f_Tau	intra-protein xl	262	331	69	4085.05	1022.27	4	-4.7	1	19.23
DGSKPPEGSSPPTKPAPPTK-VQSKIGSLDNITHVPGGGNK-a4-b4	reverse_s320f_Tau	s320f_Tau	intra-protein xl	252	353	101	4132.13	1378.38	3	-3.7	1	18.89
SQVNSLDLKK-CGSKDNIK-a9-b4	reverse_s320f_Tau	s320f_Tau	intra-protein xl	161	294	133	2189.14	730.72	3	-0.2	6	18.75
HVPGGGSVQIVYKPVDLSKVTFK-CGSLGNIHHKPGGGQVEVK-a13-b10	s320f_Tau	s320f_Tau	intra-protein xl	311	331	20	4565.42	653.211	7	0	2	18.51
GDAGKAK-GDAGKAK-a5-b5	reverse_s320f_Tau	reverse_s320f_Tau	intra-protein xl	299	299	0	1428.76	477.261	3	2.1	1	18.42
IGSLDNITHVPGGGNKKIETHK-K16-156	s320f_Tau	-	monolink	369	n/a	-	2470.32	618.588	4	0.7	2	18.4
KLDLSNVQSKCGSK-LNETSGIKSKVNK-a10-b10	s320f_Tau	reverse_s320f_Tau	intra-protein xl	290	185	105	3117.66	780.424	4	-2.4	5	18.18
KLDLSNVQSKCGSK-LDFKDR-a10-b4	s320f_Tau	s320f_Tau	intra-protein xl	290	347	57	2493.29	624.33	4	0.2	1	17.94
HVPGGGSVQIVYKPVDLSKVTFK-DGSKPPEGSSPPTKPAPPTK-a13-b14	s320f_Tau	reverse_s320f_Tau	intra-protein xl	311	262	49	4566.43	653.355	7	-1.1	3	17.89
IGSLDNITHVPGGGNKK-KNIIQVK-a16-b1	s320f_Tau	reverse_s320f_Tau	intra-protein xl	369	162	207	2685.52	896.18	3	-0.5	1	17.61
GDAGKAKK-GDAGKAKK-a5-b7	reverse_s320f_Tau	reverse_s320f_Tau	intra-protein xl	299	301	2	1684.95	422.245	4	1.8	1	17.56
DKFDLK-MVSKSK-a2-b4	reverse_s320f_Tau	s320f_Tau	intra-protein xl	95	130	35	1580.86	527.96	3	4.5	1	17.21
HVPGGGSVQIVYKPVDLSKVTFKCGSLGNIHHKPGGGQVEVK-K23-155	s320f_Tau	-	monolink	321	n/a	-	4564.43	761.746	6	-1.7	4	17.02
CGSLGNIHHKPGGGQVEVKSEKLDFK-K10-K19	s320f_Tau	-	intralink	331	340	9	2958.49	740.632	4	-2.4	4	16.99
VTFKCGSLGNIHHKPGGGQVEVK-HVPGGGSVQIVYKPVDLSK-a14-b13	s320f_Tau	s320f_Tau	intra-protein xl	331	311	20	4565.44	653.213	7	3.7	3	16.93
DNIKHVPGGGSVQIVYKPVDLSK-SKIGSTENLK-a17-b2	s320f_Tau	s320f_Tau	intra-protein xl	311	259	52	3662.99	733.606	5	0.9	1	16.9
IGSTENLKHQPGGGK-K15-155	s320f_Tau	-	monolink	274	n/a	-	1676.88	559.968	3	-3.7	1	16.78
FDLKESK-TKGDAGK-a4-b2	reverse_s320f_Tau	reverse_s320f_Tau	intra-protein xl	99	294	195	1678.87	560.632	3	-4	1	16.46
GGGPQHKLNETSGIKSK-K7-K17	reverse_s320f_Tau	-	intralink	175	185	10	1874.98	626.002	3	-0.6	1	16.39
SKVNKLDPMPVPATQLR-INDKSGCK-a5-b4	reverse_s320f_Tau	reverse_s320f_Tau	intra-protein xl	188	148	40	2951.55	738.896	4	-1.8	1	16.14
DGSKPPEGSSPPTKPAPPTK-IGSLDNITHVPGGGNKK-a14-b16	reverse_s320f_Tau	s320f_Tau	intra-protein xl	262	369	107	3817.97	955.501	4	-3	1	15.54
VTFKCGSLGNIHHKPGGGQVEVK-HQPGGGKVQIINK-a4-b7	s320f_Tau	s320f_Tau	intra-protein xl	321	274	47	3961.11	991.285	4	-0.8	1	15.33
KNIIQVKGGGPQHK-K1-K14	reverse_s320f_Tau	-	intralink	162	175	13	1640.93	547.986	3	-0.5	2	15.31
DNIKHVPGGGSVQIVYKPVDLSK-HQPGGGKVQIINK-a4-b7	s320f_Tau	s320f_Tau	intra-protein xl	298	274	24	3962.18	793.443	5	0.1	1	15.23
DGSKPPEGSSPPTKPAPPTK-HVPGGGSVQIVYKPVDLSK-a4-b13	reverse_s320f_Tau	s320f_Tau	intra-protein xl	252	311	59	4091.15	1364.72	3	-2.7	3	15.21
KLDLSNVQSKCGSK-K1-K14	s320f_Tau	-	intralink	281	294	13	1700.88	567.967	3	-0.2	2	15.07
LDFKDRVQSK-XVSKSK-a4-b4	s320f_Tau	s320f_Tau	intra-protein xl	347	130	217	2067.1	517.783	4	-2.1	1	15.07
HTEIKKNGGGPVHTINDLSGIK-K6-156	reverse_s320f_Tau	-	monolink	73	n/a	-	2470.31	495.07	5	-2.1	1	15.06
CGSLGNIHHKPGGGQVEVK-K10-K19	s320f_Tau	-	intralink	331	340	9	2111.05	528.772	4	-1.3	18	14.89
VEVQGGGPKHHINGLSGCKFTVK-HVPGGGSVQIVYKPVDLSK-a9-b13	reverse_s320f_Tau	s320f_Tau	intra-protein xl	111	311	200	4565.43	914.094	5	1.9	7	14.86
TANAQGKQGPPAAGRPTAIK-FDLKESK-a7-b4	reverse_s320f_Tau	reverse_s320f_Tau	intra-protein xl	279	99	180	2936.57	735.15	4	-0.8	1	14.84
HVPGGGSVQIVYKPVDLSK-IGSLDNITHVPGGGNKK-a13-b16	s320f_Tau	s320f_Tau	intra-protein xl	311	369	58	3823.06	956.774	4	0.1	1	14.65
DNIKHVPGGGSVQIVYKPVDLSK-VTFKCGSLGNIHHKPGGGQVEVK-a4-b4	s320f_Tau	s320f_Tau	intra-protein xl	298	321	23	5035.67	1008.14	5	0.8	4	14.55
HHINGLSGCKFTVK-ESKVEVQGGGPK-a10-b3	reverse_s320f_Tau	reverse_s320f_Tau	intra-protein xl	121	102	19	2948.52	738.137	4	-0.5	2	14.45
SKVNKLDPMPVPATQLR-INDKSGCK-a2-b4	reverse_s320f_Tau	reverse_s320f_Tau	intra-protein xl	185	148	37	2951.55	738.896	4	-2.2	1	14.41
KNGGGPVHTINDLSGIK-K1-K17	reverse_s320f_Tau	-	intralink	73	89	16	1843.98	615.667	3	-0.5	1	14.33
VNKLDPXPVPATQLRSK-YVIQVSGGGPVHKINDK-a3-b13	reverse_s320f_Tau	reverse_s320f_Tau	intra-protein xl	188	144	44	3857.1	965.283	4	3.2	1	14.23
DNIKHVPGGGSVQIVYKPVDLSK-VTFKCGSLGNIHHKPGGGQVEVK-a17-b14	s320f_Tau	s320f_Tau	intra-protein xl	311	331	20	5035.68	720.39	7	1.5	1	14.16
SGCKSQVNSLDLK-KNIIQVK-a4-b1	reverse_s320f_Tau	reverse_s320f_Tau	intra-protein xl	152	162	10	2414.33	604.589	4	2.6	1	14.12
GAAPPGQKGQANATR-NIIQVKGGGPQHK-a8-b6	s320f_Tau	reverse_s320f_Tau	intra-protein xl	163	168	5	2935.57	588.121	5	-2.7	1	13.89
VQSKIGSLDNITHVPGGGNK-K20-155	s320f_Tau	-	monolink	369	n/a	-	2175.16	726.062	3	-1.3	3	13.71
CGSLGNIHHKPGGGQVEVKSEKLDFK-K19-156	s320f_Tau	-	monolink	340	n/a	-	2976.52	993.182	3	3.5	1	13.63
TPPKSPSSAKSR-KIETHK-a4-b1	s320f_Tau	s320f_Tau	intra-protein xl	234	370	136	2134.18	712.4	3	0.4	5	13.61
DGSKPPEGSSPPTKPAPPTK-IGSTENLKHQPGGGK-a14-b8	reverse_s320f_Tau	s320f_Tau	intra-protein xl	262	267	5	3633.85	727.777	5	-4.9	2	13.57
HVPGGGSVQIVYKPVDLSKVTFK-SEKLDFK-a19-b3	s320f_Tau	s320f_Tau	intra-protein xl	317	343	26	3457.89	865.479	4	-0.1	1	13.53
DNIKHVPGGGSVQIVYKPVDLSK-SQVNSLDLKK-a4-b9	s320f_Tau	reverse_s320f_Tau	intra-protein xl	298	161	137	3718.03	744.614	5	-0.5	4	13.46
IGSLDNITHVPGGGNKK-K16-K17	s320f_Tau	-	intralink	369	370	1	1843.98	615.668	3	0	2	13.42
DGSKPPEGSSPPTKPAPPTK-HQPGGGKVQIINK-a4-b7	reverse_s320f_Tau	s320f_Tau	intra-protein xl	252	274	22	3486.84	872.717	4	-3.1	2	13.39
HVPGGGSVQIVYKPVDLSKVTFK-DGSKPPEGSSPPTKPAPPTK-a19-b4	s320f_Tau	reverse_s320f_Tau	intra-protein xl	317	252	65	4566.42	1142.61	4	-3.3	8	13.31
HVPGGGSVQIVYKPVDLSKVTFK-DGSKPPEGSSPPTKPAPPTK-a19-b14	s320f_Tau	reverse_s320f_Tau	intra-protein xl	317	262	55	4566.42	1142.61	4	-3.5	4	13.26
VEVQGGGPKHHINGLSGCKFTVK-ESKVEVQGGGPK-a9-b3	reverse_s320f_Tau	reverse_s320f_Tau	intra-protein xl	111	102	9	3799.95	950.996	4	-4.2	1	12.96
NGGGPVHTINDLSGIKSQVR-K16-155	reverse_s320f_Tau	-	monolink	89	n/a	-	2203.16	551.798	4	-4.9	6	12.78
LDFKDRVQSK-LDFKDRVQSK-a4-b4	s320f_Tau	s320f_Tau	intra-protein xl	347	347	0	2607.39	652.856	4	-3.3	1	12.75
KLDLSNVQSK-K1-K10	s320f_Tau	-	intralink	281	290	9	1268.69	423.906	3	-1.9	2	12.53
HVPGGGSVQIVYKPVDLSK-KLDLSNVQSKCGSK-a13-b10	s320f_Tau	s320f_Tau	intra-protein xl	311	290	21	3679.95	920.997	4	-1.5	1	12.26
VTFKCGSLGNIHHKPGGGQVEVKSEK-VNKLDPMPVPATQLR-a23-b3	s320f_Tau	reverse_s320f_Tau	intra-protein xl	340	188	152	4608.41	922.69	5	-4.3	1	12.24
HVPGGGSVQIVYKPVDLSK-IGSTENLKHQPGGGK-a13-b8	s320f_Tau	s320f_Tau	intra-protein xl	311	267	44	3638.94	1213.99	3	-1.3	1	12.23
GGGPQHKLNETSGIKSK-KLDLSNVQSK-a7-b1	reverse_s320f_Tau	s320f_Tau	intra-protein xl	175	281	106	3005.61	752.409	4	-3.1	1	12.12
SKIGSTENLKHQPGGGK-SKASSPSKPPTR-a10-b2	s320f_Tau	reverse_s320f_Tau	intra-protein xl	267	202	65	3116.66	624.339	5	-0.3	1	12.1
GGGPQHKLNETSGIKSK-LNETSGIKSK-a7-b8	reverse_s320f_Tau	reverse_s320f_Tau	intra-protein xl	175	183	8	2950.57	738.65	4	-0.6	1	12.09
HQPGGGKVQIINK-SQVNSLDLKK-a7-b9	s320f_Tau	reverse_s320f_Tau	intra-protein xl	274	161	113	2643.47	661.874	4	-1.7	2	12.04
YVIEAGHDTKAK-MVSKSK-a10-b4	reverse_s320f_Tau	s320f_Tau	intra-protein xl	57	130	73	2147.12	537.789	4	-2.9	1	12.04
GDAGKAKK-AKGADGK-a7-b2	reverse_s320f_Tau	s320f_Tau	intra-protein xl	301	143	158	1556.85	519.959	3	1.3	1	11.92
GGGPQHKLNETSGIKSK-SKASSPSKPPTR-a7-b2	reverse_s320f_Tau	reverse_s320f_Tau	intra-protein xl	175	202	27	3116.66	624.34	5	1.2	2	11.84
KNIIQVKGGGPQHK-INDKSGCK-a7-b4	reverse_s320f_Tau	reverse_s320f_Tau	intra-protein xl	168	148	20	2561.37	641.351	4	-0.2	1	11.73
SKIGSTENLKHQPGGGK-LNETSGIKSK-a2-b8	s320f_Tau	reverse_s320f_Tau	intra-protein xl	259	183	76	2950.58	591.125	5	4	4	11.65
ESKVEVQGGGPKHHINGLSGCK-K3-K22	reverse_s320f_Tau	-	intralink	102	121	19	2455.23	819.417	3	-0.3	11	11.6
KLDLSNVQSK-LNETSGIKSK-a1-b8	s320f_Tau	reverse_s320f_Tau	intra-protein xl	281	183	98	2344.28	587.079	4	0.1	2	11.47
YVIQVSGGGPVHKINDKSGCK-ESKVEVQGGGPK-a13-b3	reverse_s320f_Tau	reverse_s320f_Tau	intra-protein xl	144	102	42	3593.85	899.47	4	-0.6	1	11.42
SPSSAKSRLQTAPVPMPDLK-VNKLDPXPVPATQLRSK-a6-b3	s320f_Tau	reverse_s320f_Tau	intra-protein xl	240	188	52	4156.26	1040.07	4	3.9	1	11.38
GGGPQHKLNETSGIKSK-TPPKSPSSAKSR-a7-b4	reverse_s320f_Tau	s320f_Tau	intra-protein xl	175	234	59	3116.66	780.172	4	-0.2	2	11.28
SGCKSQVNSLDLKK-NVKSKIGSTENLK-a4-b5	reverse_s320f_Tau	s320f_Tau	intra-protein xl	152	259	107	3117.66	624.54	5	-2.9	2	11.22
VEVQGGGPKHHINGLSGCKFTVK-HVPGGGSVQIVYKPVDLSK-a19-b13	reverse_s320f_Tau	s320f_Tau	intra-protein xl	121	311	190	4565.44	1142.37	4	4.2	2	11.2
HVPGGGSVQIVYKPVDLSKVTFKCGSLGNIHHKPGGGQVEVK-K19-K42	s320f_Tau	-	intralink	317	340	23	4547.41	910.49	5	-0.4	1	11.19
VQSKIGSLDNITHVPGGGNKK-K21-156	s320f_Tau	-	monolink	370	n/a	-	2304.24	577.068	4	-1	1	11.15
HVPGGGSVQIVYKPVDLSK-K19-156	s320f_Tau	-	monolink	317	n/a	-	2135.16	712.728	3	-1.1	7	11.14
IPAKTPPAPKTPPSSGEPPK-K4-K20	s320f_Tau	-	intralink	174	190	16	2134.17	712.399	3	3.2	6	11.13
SKASSPSKPPTR-HTEIKK-a8-b5	reverse_s320f_Tau	reverse_s320f_Tau	intra-protein xl	208	72	136	2134.17	712.399	3	-0.8	2	11.13
KLDLSNVQSKCGSK-LNETSGIKSKVNK-a10-b8	s320f_Tau	reverse_s320f_Tau	intra-protein xl	290	183	107	3117.66	780.423	4	-3.5	1	11.12
APIRTANAQGKQGPPAAGRPTAIK-LQTAPVPXPDLKNVKSK-a11-b12	reverse_s320f_Tau	s320f_Tau	intra-protein xl	279	254	25	4389.43	878.894	5	-0.1	2	10.9
HVPGGGSVQIVYKPVDLSKVTFK-GAAPPGQKGQANATRIPAK-a19-b8	s320f_Tau	s320f_Tau	intra-protein xl	317	163	154	4424.45	885.898	5	4.5	1	10.86
FDLKESKVEVQGGGPK-ASSPSKPPTR-a7-b6	reverse_s320f_Tau	reverse_s320f_Tau	intra-protein xl	102	208	106	2881.53	721.391	4	4.7	2	10.8
DNIKHVPGGGSVQIVYKPVDLSKVTFK-DGSKPPEGSSPPTKPAPPTK-a4-b14	s320f_Tau	reverse_s320f_Tau	intra-protein xl	298	262	36	5036.68	840.454	6	-2	2	10.78
SKIGSTENLKHQPGGGK-SKASSPSKPPTR-a2-b2	s320f_Tau	reverse_s320f_Tau	intra-protein xl	259	202	57	3116.66	780.173	4	1.2	5	10.75
KIETHKLTFR-HTEIKK-a1-b5	s320f_Tau	reverse_s320f_Tau	intra-protein xl	370	72	298	2164.23	722.419	3	-1.2	1	10.63
KLDLSNVQSKCGSK-K14-156	s320f_Tau	-	monolink	294	n/a	-	1718.88	573.969	3	-2.1	2	10.53
VEVQGGGPKHHINGLSGCKFTVK-K9-155	reverse_s320f_Tau	-	monolink	111	n/a	-	2603.36	521.68	5	-1	1	10.43
CGSLGNIHHKPGGGQVEVK-HQPGGGKVQIINK-a10-b7	s320f_Tau	s320f_Tau	intra-protein xl	331	274	57	3485.82	872.464	4	-1.8	1	10.38
VNKLDPMPVPATQLRSK-INDKSGCK-a3-b4	reverse_s320f_Tau	reverse_s320f_Tau	intra-protein xl	188	148	40	2951.55	591.318	5	-2.1	1	10.36
SKASSPSKPPTR-HTEIKK-a2-b5	reverse_s320f_Tau	reverse_s320f_Tau	intra-protein xl	202	72	130	2134.18	712.401	3	2	3	10.33
KIETHKLTFR-HTEIKK-a6-b5	s320f_Tau	reverse_s320f_Tau	intra-protein xl	375	72	303	2164.23	722.419	3	-1.2	1	10.25
ESKVEVQGGGPK-DGTGSDDKKAK-a3-b9	reverse_s320f_Tau	s320f_Tau	intra-protein xl	102	141	39	2472.22	825.083	3	-3.7	2	10.21
KLDLSNVQSKCGSK-NVKSKIGSTENLK-a1-b3	s320f_Tau	s320f_Tau	intra-protein xl	281	257	24	3117.66	1040.23	3	-3.2	1	10.12
GGGPQHKLNETSGIK-K7-156	reverse_s320f_Tau	-	monolink	175	n/a	-	1677.87	560.297	3	-0.5	3	10.04
SKVNKLDPXPVPATQLR-SEKLDFK-a5-b3	reverse_s320f_Tau	s320f_Tau	intra-protein xl	188	343	155	2912.57	486.436	6	0.6	1	10.01
SKIGSTENLKHQPGGGK-LNETSGIKSK-a10-b8	s320f_Tau	reverse_s320f_Tau	intra-protein xl	267	183	84	2950.58	591.125	5	4	3	9.95
CGSLGNIHHKPGGGQVEVK-HTEIKK-a10-b5	s320f_Tau	reverse_s320f_Tau	intra-protein xl	331	72	259	2865.49	574.105	5	-1.4	1	9.86
IPAKTPPAPKTPPSSGEPPK-K10-K20	s320f_Tau	-	intralink	180	190	10	2134.17	712.399	3	3.2	26	9.79
KPERTPPTPLSPTRSR-SKIGSTENLK-a1-b2	reverse_s320f_Tau	s320f_Tau	intra-protein xl	218	259	41	3032.65	1011.89	3	-4.4	1	9.67
SLDVPKYVIQVSGGGPVHK-K6-155	reverse_s320f_Tau	-	monolink	131	n/a	-	2134.18	712.4	3	-1.3	12	9.61
HVPGGGSVQIVYKPVDLSKVTFKCGSLGNIHHKPGGGQVEVK-K19-155	s320f_Tau	-	monolink	317	n/a	-	4564.44	913.895	5	-0.7	2	9.49
GGGPQHKLNETSGIKSK-TPPKSPSSAKSR-a15-b10	reverse_s320f_Tau	s320f_Tau	intra-protein xl	183	240	57	3116.66	624.34	5	0.8	2	9.43
DDSGTGDKSK-CGSKDNIK-a8-b4	reverse_s320f_Tau	s320f_Tau	intra-protein xl	310	294	16	2066.95	689.991	3	3.7	1	9.24
HHINGLSGCKFTVK-K10-K14	reverse_s320f_Tau	-	intralink	121	125	4	1734.89	579.304	3	0.4	10	9.24
VQSKIGSLDNITHVPGGGNKK-K20-156	s320f_Tau	-	monolink	369	n/a	-	2304.24	461.856	5	-1.7	1	9.23
GGGPQHKLNETSGIK-SQVNSLDLKK-a7-b9	reverse_s320f_Tau	reverse_s320f_Tau	intra-protein xl	175	161	14	2790.48	931.169	3	-1.4	1	9.15
LQTAPVPMPDLKNVKSK-TPPAPKTPPSSGEPPK-a12-b6	s320f_Tau	s320f_Tau	intra-protein xl	254	180	74	3589.93	718.994	5	-3	1	9.14
DNIKHVPGGGSVQIVYKPVDLSKVTFK-DGSKPPEGSSPPTKPAPPTK-a23-b14	s320f_Tau	reverse_s320f_Tau	intra-protein xl	317	262	55	5036.67	1008.34	5	-3.9	4	9.13
VTFKCGSLGNIHHKPGGGQVEVK-K23-156	s320f_Tau	-	monolink	340	n/a	-	2604.35	652.094	4	-1	3	9.1
TPPKSPSSAKSR-HTEIKK-a4-b5	s320f_Tau	reverse_s320f_Tau	intra-protein xl	234	72	162	2134.18	712.4	3	0.9	1	9.03
DGSKPPEGSSPPTKPAPPTK-IGSLDNITHVPGGGNKK-a4-b16	reverse_s320f_Tau	s320f_Tau	intra-protein xl	252	369	117	3817.97	764.601	5	-4.7	1	8.97
VEVQGGGPKHHINGLSGCK-K9-156	reverse_s320f_Tau	-	monolink	111	n/a	-	2129.07	533.275	4	-0.7	1	8.91
YVIQVSGGGPVHKINDK-FTLKHTEIK-a13-b4	reverse_s320f_Tau	reverse_s320f_Tau	intra-protein xl	144	67	77	3063.68	766.928	4	1.6	1	8.88
FDLKESKVEVQGGGPK-K4-K7	reverse_s320f_Tau	-	intralink	99	102	3	1854.97	619.332	3	-0.8	1	8.8
AKTDHGAEIVYK-SEKLDFKDR-a2-b3	s320f_Tau	s320f_Tau	intra-protein xl	385	343	42	2605.33	652.341	4	-2.4	3	8.8
SKIGSTENLKHQPGGGK-TPPKSPSSAKSR-a10-b4	s320f_Tau	s320f_Tau	intra-protein xl	267	234	33	3116.66	624.34	5	1.2	1	8.76
SLDVPKYVIQVSGGGPVHK-K19-155	reverse_s320f_Tau	-	monolink	144	n/a	-	2134.17	712.399	3	-2.8	2	8.75
HHINGLSGCKFTVKSLDVPK-LQTAPVPXPDLKNVKSK-a10-b12	reverse_s320f_Tau	s320f_Tau	intra-protein xl	121	254	133	4255.27	852.062	5	-3.2	1	8.72
KPERTPPTPLSPTRSR-SKDGTGSDDKK-a1-b10	reverse_s320f_Tau	s320f_Tau	intra-protein xl	218	140	78	3093.62	1032.21	3	4.7	6	8.7
SKASSPSKPPTR-KIETHK-a2-b1	reverse_s320f_Tau	s320f_Tau	intra-protein xl	202	370	168	2134.18	712.401	3	1.6	3	8.62
VEVQGGGPKHHINGLSGCK-K9-K19	reverse_s320f_Tau	-	intralink	111	121	10	2111.06	704.693	3	-0.7	19	8.61
SGCKSQVNSLDLK-YVIEAGHDTKAK-a4-b10	reverse_s320f_Tau	reverse_s320f_Tau	intra-protein xl	152	57	95	2903.47	968.831	3	-0.3	1	8.61
NGGGPVHTINDLSGIKSQVRDK-LQTAPVPMPDLKNVKSK-a16-b12	reverse_s320f_Tau	s320f_Tau	intra-protein xl	89	254	165	4294.32	859.871	5	1.2	1	8.55
DGSKPPEGSSPPTKPAPPTK-K4-155	reverse_s320f_Tau	-	monolink	252	n/a	-	2129.1	533.284	4	0.8	6	8.49
ESKVEVQGGGPK-AKKDDSGTGDK-a3-b3	reverse_s320f_Tau	reverse_s320f_Tau	intra-protein xl	102	302	200	2472.22	825.083	3	-3.7	1	8.48
TANAQGKQGPPAAGRPTAIK-K20-155	reverse_s320f_Tau	-	monolink	292	n/a	-	2088.14	697.053	3	-5	1	8.46
VEVQGGGPKHHINGLSGCK-K9-155	reverse_s320f_Tau	-	monolink	111	n/a	-	2128.09	533.029	4	0	2	8.45
DNIKHVPGGGSVQIVYKPVDLSKVTFK-K4-K27	s320f_Tau	-	intralink	298	321	23	3062.68	766.678	4	-0.1	8	8.39
GGGPQHKLNETSGIKSK-SKASSPSKPPTR-a15-b2	reverse_s320f_Tau	reverse_s320f_Tau	intra-protein xl	183	202	19	3116.66	624.339	5	-0.3	3	8.35
ESKVEVQGGGPKHHINGLSGCK-K12-K22	reverse_s320f_Tau	-	intralink	111	121	10	2455.23	819.418	3	0.9	9	8.29
TPPAPKTPPSSGEPPKSGDR-KAKGADGK-a16-b1	s320f_Tau	s320f_Tau	intra-protein xl	190	141	49	2913.52	729.387	4	-0.5	1	8.27
HHINGLSGCKFTVK-KAKGADGK-a10-b1	reverse_s320f_Tau	s320f_Tau	intra-protein xl	121	141	20	2508.33	502.674	5	2	1	8.22
YVIEAGHDTKAKANER-KVAVVR-a12-b1	reverse_s320f_Tau	s320f_Tau	intra-protein xl	59	225	166	2609.42	653.364	4	-1.8	1	8.22
KNGGGPVHTINDLSGIK-K1-155	reverse_s320f_Tau	-	monolink	73	n/a	-	1861.01	621.343	3	-0.9	4	8.16
ENAKAKTDHGAEIVYK-TKGDAGKAK-a4-b7	s320f_Tau	reverse_s320f_Tau	intra-protein xl	383	299	84	2785.45	697.371	4	-3.4	1	8.08
GAAPPGQKGQANATR-MVSKSKDGTGSDDK-a8-b4	s320f_Tau	s320f_Tau	intra-protein xl	163	130	33	3014.47	754.624	4	-2.3	1	8.07
VAVVRTPPKSPSSAK-ANERFTLKHTEIK-a9-b8	s320f_Tau	reverse_s320f_Tau	intra-protein xl	234	67	167	3246.8	650.367	5	-3.9	1	8.06
CGSKDNIKHVPGGGSVQIVYKPVDLSK-KLDLSNVQSK-a21-b1	s320f_Tau	s320f_Tau	intra-protein xl	311	281	30	4150.21	1038.56	4	1.1	2	7.91
LDPMPVPATQLRSKASSPSKPPTR-LTFRENAKAK-a20-b8	reverse_s320f_Tau	s320f_Tau	intra-protein xl	208	383	175	3875.11	776.029	5	-0.5	1	7.89
KIETHKLTFR-K1-156	s320f_Tau	-	monolink	370	n/a	-	1427.81	476.945	3	-2.1	1	7.81
QEFEVXEDHAGTYGLGDRKDQGGYTMHQDQEGDTDAGLK-VQSKIGSLDNITHVPGGGNKK-a19-b20	s320f_Tau	s320f_Tau	intra-protein xl	24	369	345	6630.1	1327.03	5	0.6	3	7.72
SGCKSQVNSLDLKK-ESKVEVQGGGPK-a13-b3	reverse_s320f_Tau	reverse_s320f_Tau	intra-protein xl	161	102	59	2914.52	972.515	3	5	2	7.71
KDDSGTGDKSK-AKGADGKTK-a9-b7	reverse_s320f_Tau	s320f_Tau	intra-protein xl	310	148	162	2149.08	717.369	3	-1.3	1	7.64
ESKVEVQGGGPK-VVAVKKPER-a3-b5	reverse_s320f_Tau	reverse_s320f_Tau	intra-protein xl	102	217	115	2376.34	793.12	3	-1	4	7.56
LGADTDGEQDQHXTYGGQDKRDGLGYTGAHDEMVEFEQRPEAX-VNKLDPMPVPATQLR-a20-b3	reverse_s320f_Tau	reverse_s320f_Tau	intra-protein xl	418	188	230	6632.06	1106.35	6	4.3	1	7.39
SGCKSQVNSLDLK-K4-156	reverse_s320f_Tau	-	monolink	152	n/a	-	1590.79	531.271	3	-1.3	1	7.38
ASSPSKPPTRVVAVKKPER-SGCKSQVNSLDLK-a6-b4	reverse_s320f_Tau	reverse_s320f_Tau	intra-protein xl	208	152	56	3605.97	1203	3	4.9	1	7.35
LQTAPVPXPDLKNVKSK-TPPKSPSSAKSR-a15-b10	s320f_Tau	s320f_Tau	intra-protein xl	257	240	17	3260.78	1087.94	3	1.6	1	7.31
KLDLSNVQSK-INDKSGCK-a1-b4	s320f_Tau	reverse_s320f_Tau	intra-protein xl	281	148	133	2189.14	548.292	4	-0.4	1	7.19
LDPMPVPATQLRSKASSPSKPPTR-QGPPAAGRPTAIKTK-a14-b13	reverse_s320f_Tau	reverse_s320f_Tau	intra-protein xl	202	292	90	4190.28	839.064	5	-4.7	1	7.19
SKIGSTENLKHQPGGGK-TPPKSPSSAKSR-a2-b4	s320f_Tau	s320f_Tau	intra-protein xl	259	234	25	3116.67	780.175	4	3.8	1	7.17
HVPGGGSVQIVYKPVDLSKVTFK-K19-156	s320f_Tau	-	monolink	317	n/a	-	2610.45	871.158	3	3.3	1	7.17
TPSLPTPPTREPKK-SEKLDFK-a13-b3	s320f_Tau	s320f_Tau	intra-protein xl	224	343	119	2551.39	638.856	4	1.2	1	7.1
GAAPPGQKGQANATR-KDDSGTGDKSK-a8-b9	s320f_Tau	reverse_s320f_Tau	intra-protein xl	163	310	147	2697.32	675.338	4	-4.5	1	7.02
KLDLSNVQSKCGSK-FTVKSLDVPK-a10-b4	s320f_Tau	reverse_s320f_Tau	intra-protein xl	290	125	165	2833.52	709.389	4	-0.8	1	6.98
GADGKTKIATPR-DKFDLKESK-a5-b2	s320f_Tau	reverse_s320f_Tau	intra-protein xl	148	95	53	2460.33	821.118	3	3.7	1	6.89
DGSKPPEGSSPPTKPAPPTK-KPERTPPTPLSPTRSR-a14-b1	reverse_s320f_Tau	reverse_s320f_Tau	intra-protein xl	262	218	44	3931.06	787.221	5	-4.1	2	6.79
YVIEAGHDTKAKANER-K12-156	reverse_s320f_Tau	-	monolink	59	n/a	-	1956.99	653.338	3	0.3	1	6.74
YVIQVSGGGPVHKINDK-ANERFTLKHTEIK-a13-b8	reverse_s320f_Tau	reverse_s320f_Tau	intra-protein xl	144	67	77	3533.91	884.485	4	3	1	6.66
APIRTANAQGKQGPPAAGRPTAIK-K11-K24	reverse_s320f_Tau	-	intralink	279	292	13	2508.4	837.14	3	1.7	2	6.61
LQTAPVPXPDLKNVK-DKFDLKESK-a12-b2	s320f_Tau	reverse_s320f_Tau	intra-protein xl	254	95	159	2912.57	971.865	3	4.6	1	6.61
SLDVPKYVIQVSGGGPVHK-K6-156	reverse_s320f_Tau	-	monolink	131	n/a	-	2135.17	712.731	3	3	18	6.58
HVPGGGSVQIVYKPVDLSKVTFKCGSLGNIHHKPGGGQVEVK-K19-156	s320f_Tau	-	monolink	317	n/a	-	4565.42	1142.36	4	-0.1	2	6.47
VQSKIGSLDNITHVPGGGNKK-K20-155	s320f_Tau	-	monolink	369	n/a	-	2303.26	768.76	3	-1.8	1	6.41
SPSSAKSRLQTAPVPXPDLK-SGCKSQVNSLDLKK-a6-b13	s320f_Tau	reverse_s320f_Tau	intra-protein xl	240	161	79	3826.02	957.512	4	4.9	1	6.4
TANAQGKQGPPAAGRPTAIKTK-KPERTPPTPLSPTRSR-a7-b1	reverse_s320f_Tau	reverse_s320f_Tau	intra-protein xl	279	218	61	4119.27	1030.83	4	0.1	2	6.26
SQVRDKFDLK-DGTGSDDKK-a6-b8	reverse_s320f_Tau	s320f_Tau	intra-protein xl	95	140	45	2294.14	765.722	3	1.7	1	6.25
GGGPQHKLNETSGIKSK-TPPKSPSSAKSR-a15-b4	reverse_s320f_Tau	s320f_Tau	intra-protein xl	183	234	51	3116.66	624.339	5	-0.3	1	6.23
KLDLSNVQSKCGSK-AKGADGKTK-a10-b7	s320f_Tau	s320f_Tau	intra-protein xl	290	148	142	2575.37	644.851	4	3.1	1	6.22
FTVKSLDVPKYVIQVSGGGPVHK-K4-K23	reverse_s320f_Tau	-	intralink	125	144	19	2592.43	865.149	3	-2.6	3	6.22
HVPGGGSVQIVYKPVDLSKVTFKCGSLGNIHHKPGGGQVEVK-K42-155	s320f_Tau	-	monolink	340	n/a	-	4564.46	913.899	5	3.9	1	6.22
VNKLDPXPVPATQLR-LNETSGIKSKVNK-a3-b10	reverse_s320f_Tau	reverse_s320f_Tau	intra-protein xl	188	185	3	3248.79	813.205	4	2.9	1	6.18
GGGPQHKLNETSGIKSK-SKIGSTENLK-a15-b2	reverse_s320f_Tau	s320f_Tau	intra-protein xl	183	259	76	2950.59	738.654	4	4.4	1	6.13
GGGPQHKLNETSGIKSK-KIETHK-a15-b1	reverse_s320f_Tau	s320f_Tau	intra-protein xl	183	370	187	2629.41	877.479	3	-1.8	1	6.11
SKIGSTENLKHQPGGGK-SKASSPSKPPTR-a10-b8	s320f_Tau	reverse_s320f_Tau	intra-protein xl	267	208	59	3116.66	780.173	4	1.2	1	6.08
HVPGGGSVQIVYKPVDLSKVTFK-VNKLDPXPVPATQLR-a13-b3	s320f_Tau	reverse_s320f_Tau	intra-protein xl	311	188	123	4286.37	1072.6	4	3.6	1	6.06
NGGGPVHTINDLSGIKSQVR-DKFDLK-a16-b2	reverse_s320f_Tau	reverse_s320f_Tau	intra-protein xl	89	95	6	2950.55	984.525	3	0.6	3	6.03
LTFRENAKAK-LTFRENAKAK-a8-b8	s320f_Tau	s320f_Tau	intra-protein xl	383	383	0	2491.38	831.468	3	-4.2	1	5.91
TKIATPRGAAPPGQK-TPPKSPSSAKSR-a2-b10	s320f_Tau	s320f_Tau	intra-protein xl	150	240	90	2871.59	718.906	4	0.1	1	5.81
SKIGSTENLKHQPGGGK-SKIGSTENLK-a10-b2	s320f_Tau	s320f_Tau	intra-protein xl	267	259	8	2950.57	738.65	4	-1.1	2	5.79
HVPGGGSVQIVYKPVDLSKVTFKCGSLGNIHHKPGGGQVEVK-K33-155	s320f_Tau	-	monolink	331	n/a	-	4564.44	913.895	5	-0.7	2	5.73
XVSKSKDGTGSDDK-KVAVVRTPPK-a4-b1	s320f_Tau	s320f_Tau	intra-protein xl	130	225	95	2701.43	901.484	3	-1.4	3	5.71
FTVKSLDVPKYVIQVSGGGPVHK-K23-156	reverse_s320f_Tau	-	monolink	144	n/a	-	2610.43	871.153	3	-2.7	2	5.68
TPSLPTPPTREPKK-SKDGTGSDDKK-a13-b2	s320f_Tau	s320f_Tau	intra-protein xl	224	132	92	2822.48	706.627	4	3.5	1	5.64
DNIKHVPGGGSVQIVYKPVDLSKVTFK-K17-K23	s320f_Tau	-	intralink	311	317	6	3062.67	1021.9	3	-4.1	2	5.57
IGSLDNITHVPGGGNKKIETHK-K22-156	s320f_Tau	-	monolink	375	n/a	-	2470.31	824.445	3	-2.8	1	5.55
LQTAPVPXPDLKNVK-TPPKSPSSAKSR-a12-b10	s320f_Tau	s320f_Tau	intra-protein xl	254	240	14	3045.64	1016.22	3	-4.8	1	5.48
FDLKESKVEVQGGGPK-FTVKSLDVPK-a7-b4	reverse_s320f_Tau	reverse_s320f_Tau	intra-protein xl	102	125	23	2987.62	747.912	4	-1.4	1	5.47
NGGGPVHTINDLSGIKSQVR-DKFDLKESK-a16-b2	reverse_s320f_Tau	reverse_s320f_Tau	intra-protein xl	89	95	6	3294.72	1099.25	3	-1	2	5.43
HHINGLSGCKFTVK-K10-155	reverse_s320f_Tau	-	monolink	121	n/a	-	1751.91	438.986	4	-2.3	4	5.41
IPAKTPPAPKTPPSSGEPPK-LQTAPVPMPDLKNVKSK-a4-b12	s320f_Tau	s320f_Tau	intra-protein xl	174	254	80	3999.21	1000.81	4	0.2	1	5.35
IGSTENLKHQPGGGK-VNKLDPMPVPATQLR-a8-b3	s320f_Tau	reverse_s320f_Tau	intra-protein xl	267	188	79	3337.77	835.449	4	-4.7	1	5.35
SKVNKLDPXPVPATQLR-LQTAPVPMPDLKNVK-a2-b12	reverse_s320f_Tau	s320f_Tau	intra-protein xl	185	254	69	3697.04	740.415	5	1.8	1	5.34
IPAKTPPAPKTPPSSGEPPK-K4-K10	s320f_Tau	-	intralink	174	180	6	2134.18	712.4	3	4.8	8	5.3
LDPXPVPATQLRSKASSPSKPPTR-FTVKSLDVPK-a14-b4	reverse_s320f_Tau	reverse_s320f_Tau	intra-protein xl	202	125	77	3847.09	962.779	4	-1.6	2	5.29
ASSPSKPPTRVVAVK-SKSVXR-a6-b2	reverse_s320f_Tau	reverse_s320f_Tau	intra-protein xl	208	312	104	2383.33	795.452	3	2.3	1	5.27
SKVNKLDPMPVPATQLR-FTLKHTEIK-a2-b4	reverse_s320f_Tau	reverse_s320f_Tau	intra-protein xl	185	67	118	3146.77	1049.93	3	4.5	1	5.24
GGGPQHKLNETSGIK-SGCKSQVNSLDLKK-a7-b4	reverse_s320f_Tau	reverse_s320f_Tau	intra-protein xl	175	152	23	3222.68	1075.23	3	2.9	1	5.24
QEFEVMEDHAGTYGLGDRKDQGGYTMHQDQEGDTDAGLK-VQSKIGSLDNITHVPGGGNKK-a19-b4	s320f_Tau	s320f_Tau	intra-protein xl	24	353	329	6614.07	1323.82	5	-4.7	3	5.17
FDLKESKVEVQGGGPK-QGPPAAGRPTAIKTK-a4-b13	reverse_s320f_Tau	reverse_s320f_Tau	intra-protein xl	99	292	193	3346.83	837.715	4	0.7	1	5.16
CGSLGNIHHKPGGGQVEVKSEKLDFK-K19-K26	s320f_Tau	-	intralink	340	347	7	2958.5	592.708	5	-0.7	1	5.15
LQTAPVPXPDLKNVKSK-LNETSGIKSK-a12-b8	s320f_Tau	reverse_s320f_Tau	intra-protein xl	254	183	71	3094.69	774.68	4	-1.3	1	5.13
GGGPQHKLNETSGIK-KDDSGTGDK-a7-b1	reverse_s320f_Tau	reverse_s320f_Tau	intra-protein xl	175	302	127	2581.26	646.323	4	-0.2	1	5.08
GAAPPGQKGQANATR-HQPGGGKVQIINKK-a8-b13	s320f_Tau	s320f_Tau	intra-protein xl	163	280	117	3063.67	1022.23	3	0.9	1	5.07
ASSPSKPPTRVVAVK-IETHKLTFRENAK-a6-b5	reverse_s320f_Tau	s320f_Tau	intra-protein xl	208	375	167	3246.8	812.707	4	-3.9	2	5.06
GAAPPGQKGQANATR-SKIGSTENLK-a8-b2	s320f_Tau	s320f_Tau	intra-protein xl	163	259	96	2636.39	528.286	5	0.6	2	5.02
KIETHKLTFR-SKIGSTENLK-a6-b2	s320f_Tau	s320f_Tau	intra-protein xl	375	259	116	2485.38	829.467	3	-4.9	1	4.91
YVIQVSGGGPVHKINDK-K13-K17	reverse_s320f_Tau	-	intralink	144	148	4	1948.04	650.353	3	-3.1	1	4.91
DNIKHVPGGGSVQIVYKPVDLSKVTFK-SPSSAKSRLQTAPVPXPDLK-a23-b6	s320f_Tau	s320f_Tau	intra-protein xl	317	240	77	5187.82	1038.57	5	3.9	1	4.88
HVPGGGSVQIVYKPVDLSKVTFK-K13-K23	s320f_Tau	-	intralink	311	321	10	2592.43	865.151	3	-1.1	1	4.87
ESKVEVQGGGPK-GADGKTKIATPR-a3-b5	reverse_s320f_Tau	s320f_Tau	intra-protein xl	102	148	46	2565.37	856.132	3	-1.2	1	4.79
VNKLDPXPVPATQLRSK-FTLKHTEIK-a3-b4	reverse_s320f_Tau	reverse_s320f_Tau	intra-protein xl	188	67	121	3162.74	791.693	4	-1.8	1	4.77
VQSKIGSLDNITHVPGGGNK-TPPAPKTPPSSGEPPK-a4-b6	s320f_Tau	s320f_Tau	intra-protein xl	353	180	173	3744.99	750.005	5	4.8	1	4.68
ADSTESGPEESGDETPTQLPSEKLGADTDGEQDQHMTYGGQDKR-KPERTPPTPLSPTRSR-a43-b1	reverse_s320f_Tau	reverse_s320f_Tau	intra-protein xl	418	218	200	6650.06	1331.02	5	-3.3	3	4.64
KNGGGPVHTINDLSGIKSQVR-K1-K17	reverse_s320f_Tau	-	intralink	73	89	16	2314.24	772.421	3	-0.5	1	4.63
LGADTDGEQDQHXTYGGQDKRDGLGYTGAHDEMVEFEQRPEAM-VNKLDPMPVPATQLR-a20-b3	reverse_s320f_Tau	reverse_s320f_Tau	intra-protein xl	418	188	230	6616.06	1103.68	6	4.7	1	4.62
NGGGPVHTINDLSGIKSQVRDK-LNETSGIKSKVNK-a16-b10	reverse_s320f_Tau	reverse_s320f_Tau	intra-protein xl	89	185	96	3846.07	962.525	4	2.4	3	4.62
LQTAPVPMPDLKNVK-AKTDHGAEIVYK-a12-b2	s320f_Tau	s320f_Tau	intra-protein xl	254	385	131	3118.66	1040.56	3	-3.4	2	4.61
FTVKSLDVPKYVIQVSGGGPVHK-TANAQGKQGPPAAGRPTAIK-a10-b7	reverse_s320f_Tau	reverse_s320f_Tau	intra-protein xl	131	279	148	4525.5	1132.38	4	4	2	4.6
SGCKSQVNSLDLK-VVAVKKPER-a4-b6	reverse_s320f_Tau	reverse_s320f_Tau	intra-protein xl	152	218	66	2597.41	866.812	3	-2.9	1	4.57
NIIQVKGGGPQHKLNETSGIK-GGGPQHKLNETSGIKSK-a6-b15	reverse_s320f_Tau	reverse_s320f_Tau	intra-protein xl	168	183	15	4092.2	1365.07	3	-2.5	1	4.54
KNGGGPVHTINDLSGIK-KDDSGTGDK-a1-b1	reverse_s320f_Tau	reverse_s320f_Tau	intra-protein xl	73	302	229	2765.39	922.803	3	0.6	1	4.52
LNETSGIKSKVNK-KLDLSNVQSK-a10-b1	reverse_s320f_Tau	s320f_Tau	intra-protein xl	185	281	96	2685.48	896.169	3	-2.8	1	4.51
LNETSGIKSKVNK-SKIGSTENLK-a10-b2	reverse_s320f_Tau	s320f_Tau	intra-protein xl	185	259	74	2630.44	877.821	3	-3.6	1	4.33
LDLSNVQSKCGSK-VVAVKKPER-a9-b5	s320f_Tau	reverse_s320f_Tau	intra-protein xl	290	217	73	2597.43	866.816	3	1.3	1	4.32
CGSKDNIKHVPGGGSVQIVYKPVDLSK-VQSKIGSLDNITHVPGGGNK-a4-b4	s320f_Tau	s320f_Tau	intra-protein xl	294	353	59	5039.67	1008.94	5	4.7	1	4.29
FDLKESKVEVQGGGPK-KPERTPPTPLSPTRSR-a4-b1	reverse_s320f_Tau	reverse_s320f_Tau	intra-protein xl	99	218	119	3673.99	919.504	4	1.9	1	4.14
SGCKSQVNSLDLK-SEKLDFKDR-a4-b3	reverse_s320f_Tau	s320f_Tau	intra-protein xl	152	343	191	2709.38	678.352	4	4.3	1	4.12
DNIKHVPGGGSVQIVYKPVDLSKVTFK-VEVQGGGPKHHINGLSGCK-a4-b9	s320f_Tau	reverse_s320f_Tau	intra-protein xl	298	111	187	5035.68	720.39	7	1.5	1	4.01
ADSTESGPEESGDETPTQLPSEKLGADTDGEQDQHXTYGGQDKR-SKASSPSKPPTRVVAVK-a43-b2	reverse_s320f_Tau	reverse_s320f_Tau	intra-protein xl	418	202	216	6585.06	1318.02	5	-3	5	4.01
DDSGTGDKSKSVMR-EPKKVAVVR-a10-b3	reverse_s320f_Tau	s320f_Tau	intra-protein xl	312	224	88	2644.39	882.47	3	0.5	1	3.98
SLDVPKYVIQVSGGGPVHK-K19-156	reverse_s320f_Tau	-	monolink	144	n/a	-	2135.15	712.725	3	-4.6	5	3.89
SGCKSQVNSLDLKK-VVAVKKPER-a4-b5	reverse_s320f_Tau	reverse_s320f_Tau	intra-protein xl	152	217	65	2725.52	909.513	3	-0.1	1	3.86
GGGPQHKLNETSGIKSK-YVIQVSGGGPVHKINDK-a7-b13	reverse_s320f_Tau	reverse_s320f_Tau	intra-protein xl	175	144	31	3684.97	922.25	4	2.8	1	3.85
QEFEVXEDHAGTYGLGDRKDQGGYTMHQDQEGDTDAGLK-KNGGGPVHTINDLSGIKSQVR-a19-b17	s320f_Tau	reverse_s320f_Tau	intra-protein xl	24	89	65	6658.08	1332.62	5	-3.4	2	3.75
GAAPPGQKGQANATR-KNIIQVKGGGPQHK-a8-b7	s320f_Tau	reverse_s320f_Tau	intra-protein xl	163	168	5	3063.68	766.929	4	4.7	1	3.75
SPSSAKSRLQTAPVPXPDLK-SGCKSQVNSLDLKK-a6-b4	s320f_Tau	reverse_s320f_Tau	intra-protein xl	240	152	88	3826.02	957.512	4	4.9	2	3.72
DGSKPPEGSSPPTKPAPPTK-TPPAPKTPPSSGEPPKSGDR-a4-b16	reverse_s320f_Tau	s320f_Tau	intra-protein xl	252	190	62	4114.1	823.828	5	3.2	1	3.72
YVIQVSGGGPVHKINDK-KLDLSNVQSK-a13-b1	reverse_s320f_Tau	s320f_Tau	intra-protein xl	144	281	137	3078.66	1027.23	3	-2.4	1	3.68
TPPAPKTPPSSGEPPKSGDR-SKVNKLDPMPVPATQLR-a6-b5	s320f_Tau	reverse_s320f_Tau	intra-protein xl	180	188	8	4033.14	1009.29	4	3.2	1	3.65
XVSKSKDGTGSDDK-KVAVVRTPPK-a6-b1	s320f_Tau	s320f_Tau	intra-protein xl	132	225	93	2701.44	901.489	3	3.9	1	3.63
GAAPPGQKGQANATRIPAK-IPAKTPPAPK-a8-b4	s320f_Tau	s320f_Tau	intra-protein xl	163	174	11	2988.69	997.237	3	0.1	1	3.56
ESKVEVQGGGPK-EPKKVAVVR-a3-b4	reverse_s320f_Tau	s320f_Tau	intra-protein xl	102	225	123	2376.35	793.124	3	4.8	1	3.54
VQSKIGSLDNITHVPGGGNKK-HQPGGGKVQIINKK-a20-b13	s320f_Tau	s320f_Tau	intra-protein xl	369	280	89	3789.1	948.284	4	0.4	1	3.54
DGSKPPEGSSPPTKPAPPTK-SKASSPSKPPTRVVAVK-a4-b2	reverse_s320f_Tau	reverse_s320f_Tau	intra-protein xl	252	202	50	3850.1	1284.37	3	3	2	3.53
HQPGGGKVQIINK-SGCKSQVNSLDLK-a7-b4	s320f_Tau	reverse_s320f_Tau	intra-protein xl	274	152	122	2947.56	983.527	3	1	1	3.46
DNIKHVPGGGSVQIVYKPVDLSKVTFK-DGSKPPEGSSPPTKPAPPTK-a17-b14	s320f_Tau	reverse_s320f_Tau	intra-protein xl	311	262	49	5036.69	720.535	7	1.2	1	3.31
TPPKSPSSAKSR-SQVNSLDLKK-a10-b9	s320f_Tau	reverse_s320f_Tau	intra-protein xl	240	161	79	2510.37	837.799	3	1.5	1	3.3
HHINGLSGCKFTVK-KIETHKLTFR-a10-b1	reverse_s320f_Tau	s320f_Tau	intra-protein xl	121	370	249	3006.61	1003.21	3	-4.3	1	3.2
TPPSSGEPPKSGDR-KIETHKLTFR-a10-b6	s320f_Tau	s320f_Tau	intra-protein xl	190	375	185	2820.48	941.167	3	-0.1	1	3.14
LGADTDGEQDQHMTYGGQDKRDGLGYTGAHDEXVEFEQRPEAX-KNGGGPVHTINDLSGIKSQVR-a20-b17	reverse_s320f_Tau	reverse_s320f_Tau	intra-protein xl	418	89	329	7130.3	1189.39	6	3.7	1	3.12
SEKLDFKDR-SEKLDFKDR-a3-b3	s320f_Tau	s320f_Tau	intra-protein xl	343	343	0	2411.22	804.749	3	-4.6	1	3.12
SGCKSQVNSLDLKK-LNETSGIKSKVNK-a13-b10	reverse_s320f_Tau	reverse_s320f_Tau	intra-protein xl	161	185	24	3117.67	1040.23	3	-0.5	1	3.11
SGCKSQVNSLDLKK-NVKSKIGSTENLK-a4-b3	reverse_s320f_Tau	s320f_Tau	intra-protein xl	152	257	105	3117.66	1040.23	3	-3.2	1	3.01
LGADTDGEQDQHMTYGGQDKRDGLGYTGAHDEXVEFEQRPEAM-CGSLGNIHHKPGGGQVEVKSEK-a20-b10	reverse_s320f_Tau	s320f_Tau	intra-protein xl	418	331	87	7255.27	1210.22	6	0.3	1	3.01
VQSKIGSLDNITHVPGGGNKK-QGPPAAGRPTAIKTKGDAGK-a4-b15	s320f_Tau	reverse_s320f_Tau	intra-protein xl	353	294	59	4206.28	1403.1	3	-1.2	3	3.01
YVIQVSGGGPVHKINDKSGCK-SRLQTAPVPXPDLKNVK-a17-b14	reverse_s320f_Tau	s320f_Tau	intra-protein xl	148	254	106	4289.28	1430.77	3	3.2	1	2.95
GAAPPGQKGQANATRIPAK-DKFDLKESK-a8-b6	s320f_Tau	reverse_s320f_Tau	intra-protein xl	163	99	64	3078.64	1027.22	3	-0.8	1	2.93
DGSKPPEGSSPPTKPAPPTKAPIR-TKIATPRGAAPPGQK-a4-b2	reverse_s320f_Tau	s320f_Tau	intra-protein xl	252	150	102	4041.2	1011.31	4	-0.7	1	2.91
SLDVPKYVIQVSGGGPVHKINDK-VEVQGGGPKHHINGLSGCKFTVK-a6-b9	reverse_s320f_Tau	reverse_s320f_Tau	intra-protein xl	131	111	20	5035.69	720.391	7	2.9	1	2.86
TPPKSPSSAKSR-KIETHKLTFR-a10-b1	s320f_Tau	s320f_Tau	intra-protein xl	240	370	130	2651.47	884.83	3	-3.5	1	2.83
VQSKIGSLDNITHVPGGGNK-ENAKAKTDHGAEIVYK-a4-b6	s320f_Tau	s320f_Tau	intra-protein xl	353	385	32	3931.06	1311.36	3	3.9	1	2.78
GADGKTKIATPR-KAKGADGK-a5-b1	s320f_Tau	s320f_Tau	intra-protein xl	148	141	7	2125.19	709.405	3	3.1	1	2.77
VAVVRTPPKSPSSAK-IPAKTPPAPK-a9-b4	s320f_Tau	s320f_Tau	intra-protein xl	234	174	60	2679.57	894.199	3	2.3	1	2.77
DGSKPPEGSSPPTKPAPPTKAPIR-QGPPAAGRPTAIKTK-a14-b13	reverse_s320f_Tau	reverse_s320f_Tau	intra-protein xl	262	292	30	4041.2	1011.31	4	0.2	1	2.74
LQTAPVPXPDLKNVKSK-SGCKSQVNSLDLK-a15-b4	s320f_Tau	reverse_s320f_Tau	intra-protein xl	257	152	105	3453.8	1152.28	3	-5	1	2.7
CGSKDNIKHVPGGGSVQIVYKPVDLSK-LQTAPVPXPDLKNVK-a21-b12	s320f_Tau	s320f_Tau	intra-protein xl	311	254	57	4685.48	938.104	5	-3	1	2.68
HVPGGGSVQIVYKPVDLSKVTFK-K13-155	s320f_Tau	-	monolink	311	n/a	-	2609.46	870.827	3	-1	2	2.59
IPAKTPPAPKTPPSSGEPPK-FDLKESKVEVQGGGPK-a4-b4	s320f_Tau	reverse_s320f_Tau	intra-protein xl	174	99	75	3851.09	1284.7	3	4.5	1	2.55
TANAQGKQGPPAAGRPTAIKTK-SGCKSQVNSLDLKK-a20-b13	reverse_s320f_Tau	reverse_s320f_Tau	intra-protein xl	292	161	131	3863.08	1288.7	3	2.3	1	2.52
KNGGGPVHTINDLSGIK-NVKSKIGSTENLK-a1-b3	reverse_s320f_Tau	s320f_Tau	intra-protein xl	73	257	184	3260.77	1087.93	3	0.5	1	2.51
LQTAPVPXPDLKNVKSK-SGCKSQVNSLDLK-a12-b4	s320f_Tau	reverse_s320f_Tau	intra-protein xl	254	152	102	3453.82	1152.28	3	1.1	1	2.51
TANAQGKQGPPAAGRPTAIKTK-KLDLSNVQSKCGSK-a7-b10	reverse_s320f_Tau	s320f_Tau	intra-protein xl	279	290	11	3863.05	1288.69	3	-4.7	1	2.5
MVSKSKDGTGSDDK-KIETHKLTFR-a4-b1	s320f_Tau	s320f_Tau	intra-protein xl	130	370	240	2863.49	955.504	3	4.3	1	2.48
NIIQVKGGGPQHK-AKKDDSGTGDK-a6-b3	reverse_s320f_Tau	reverse_s320f_Tau	intra-protein xl	168	302	134	2633.38	878.802	3	2	1	2.46
TANAQGKQGPPAAGRPTAIKTK-KLDLSNVQSKCGSK-a20-b1	reverse_s320f_Tau	s320f_Tau	intra-protein xl	292	281	11	3863.05	1288.69	3	-4.7	1	2.4
IGSLDNITHVPGGGNKK-KNIIQVKGGGPQHK-a16-b7	s320f_Tau	reverse_s320f_Tau	intra-protein xl	369	168	201	3346.86	837.723	4	3.9	1	2.35
GGGPQHKLNETSGIKSK-SKIGSTENLK-a7-b2	reverse_s320f_Tau	s320f_Tau	intra-protein xl	175	259	84	2950.58	984.536	3	3.8	2	2.32
INDKSGCKSQVNSLDLK-AKTDHGAEIVYK-a8-b2	reverse_s320f_Tau	s320f_Tau	intra-protein xl	152	385	233	3373.72	844.439	4	1.6	1	2.3
GGGPQHKLNETSGIKSK-YVIQVSGGGPVHKINDK-a15-b13	reverse_s320f_Tau	reverse_s320f_Tau	intra-protein xl	183	144	39	3684.97	922.25	4	2.8	2	2.24
HQPGGGKVQIINKK-MVSKSKDGTGSDDK-a13-b4	s320f_Tau	s320f_Tau	intra-protein xl	280	130	150	3094.61	1032.55	3	1.5	1	2.21
MVSKSKDGTGSDDK-KIETHKLTFR-a4-b6	s320f_Tau	s320f_Tau	intra-protein xl	130	375	245	2863.49	955.504	3	4.3	1	2.12
CGSKDNIKHVPGGGSVQIVYKPVDLSK-TPSLPTPPTREPKK-a4-b13	s320f_Tau	s320f_Tau	intra-protein xl	294	224	70	4567.43	1142.87	4	-4	1	2.11
HHINGLSGCKFTVK-KIETHKLTFR-a10-b6	reverse_s320f_Tau	s320f_Tau	intra-protein xl	121	375	254	3006.63	1003.22	3	2.3	1	2.1
VEVQGGGPKHHINGLSGCK-KPERTPPTPLSPTRSR-a9-b1	reverse_s320f_Tau	reverse_s320f_Tau	intra-protein xl	111	218	107	3930.05	983.522	4	-2.4	1	1.97
SGCKSQVNSLDLKK-NVKSKIGSTENLK-a13-b3	reverse_s320f_Tau	s320f_Tau	intra-protein xl	161	257	96	3117.66	1040.23	3	-3.2	1	1.94
SPSSAKSRLQTAPVPXPDLK-KNIIQVK-a6-b1	s320f_Tau	reverse_s320f_Tau	intra-protein xl	240	162	78	3104.72	1035.91	3	-2.2	1	1.91
LQTAPVPXPDLKNVK-FTVKSLDVPK-a12-b4	s320f_Tau	reverse_s320f_Tau	intra-protein xl	254	125	129	2936.64	735.167	4	2.6	1	1.83
TDHGAEIVYKSPVVSGDTSPR-HQPGGGKVQIINKK-a10-b13	s320f_Tau	s320f_Tau	intra-protein xl	395	280	115	3855.04	964.768	4	3.6	1	1.81
TANAQGKQGPPAAGRPTAIKTK-SGCKSQVNSLDLKK-a20-b4	reverse_s320f_Tau	reverse_s320f_Tau	intra-protein xl	292	152	140	3863.08	1288.7	3	2.3	1	1.8
VQSKIGSLDNITHVPGGGNK-VQSKIGSLDNITHVPGGGNK-a4-b4	s320f_Tau	s320f_Tau	intra-protein xl	353	353	0	4178.21	1045.56	4	-0.6	2	1.76
QEFEVXEDHAGTYGLGDRKDQGGYTMHQDQEGDTDAGLK-VQSKIGSLDNITHVPGGGNKK-a19-b4	s320f_Tau	s320f_Tau	intra-protein xl	24	353	329	6630.08	1327.02	5	-2.3	1	1.67
TDHGAEIVYKSPVVSGDTSPR-VQIINKKLDLSNVQSK-a10-b6	s320f_Tau	s320f_Tau	intra-protein xl	395	280	115	4178.21	1045.56	4	-3.9	2	1.6
LGADTDGEQDQHMTYGGQDKRDGLGYTGAHDEMVEFEQRPEAX-VNKLDPMPVPATQLR-a20-b3	reverse_s320f_Tau	reverse_s320f_Tau	intra-protein xl	418	188	230	6616.05	1103.68	6	3	1	1.59
APIRTANAQGKQGPPAAGRPTAIK-K11-156	reverse_s320f_Tau	-	monolink	279	n/a	-	2526.41	843.144	3	2.5	1	1.57
TANAQGKQGPPAAGRPTAIKTK-KLDLSNVQSKCGSK-a7-b1	reverse_s320f_Tau	s320f_Tau	intra-protein xl	279	281	2	3863.05	1288.69	3	-4.7	2	1.53
YVIEAGHDTKAKANER-KPERTPPTPLSPTR-a12-b1	reverse_s320f_Tau	reverse_s320f_Tau	intra-protein xl	59	218	159	3514.84	1172.62	3	-3.2	1	1.38
VEVQGGGPKHHINGLSGCKFTVK-K23-156	reverse_s320f_Tau	-	monolink	125	n/a	-	2604.35	869.124	3	-0.3	1	1.37
IPAKTPPAPKTPPSSGEPPK-KNGGGPVHTINDLSGIK-a10-b1	s320f_Tau	reverse_s320f_Tau	intra-protein xl	180	73	107	3840.08	961.029	4	1.5	1	1.28
IATPRGAAPPGQKGQANATR-HHINGLSGCKFTVK-a13-b10	s320f_Tau	reverse_s320f_Tau	intra-protein xl	163	121	42	3695.96	924.997	4	3.8	1	1.2
DGSKPPEGSSPPTKPAPPTKAPIRTANAQGK-KPERTPPTPLSPTRSR-a14-b1	reverse_s320f_Tau	reverse_s320f_Tau	intra-protein xl	262	218	44	5038.69	1260.68	4	-0.3	1	1.19
DGSKPPEGSSPPTKPAPPTKAPIRTANAQGK-KPERTPPTPLSPTRSR-a4-b1	reverse_s320f_Tau	reverse_s320f_Tau	intra-protein xl	252	218	34	5038.69	1260.68	4	-0.3	1	0.75
IPAKTPPAPKTPPSSGEPPK-KPERTPPTPLSPTR-a4-b1	s320f_Tau	reverse_s320f_Tau	intra-protein xl	174	218	44	3710.03	1237.68	3	-3.6	1	0.73
NGGGPVHTINDLSGIKSQVR-K16-156	reverse_s320f_Tau	-	monolink	89	n/a	-	2204.16	735.727	3	1.1	1	0.48
DNIKHVPGGGSVQIVYKPVDLSK-VQSKIGSLDNITHVPGGGNKK-a4-b20	s320f_Tau	s320f_Tau	intra-protein xl	298	369	71	4735.58	1184.9	4	3	1	-0.81

## Sheet: Fig4g_SF3
Id	Protein1	Protein2	XLType	AbsPos1	AbsPos2	deltaAA	Mr	Mz	z	Error_rel[ppm]	nseen	ld-Score
HQPGGGKVQIINK-K7-155	s320f_Tau	-	monolink	274	n/a	-	1529.87	510.964	3	-1.5	9	51.19
VQIINKKLDLSNVQSK-K6-K7	s320f_Tau	-	intralink	280	281	1	1964.13	655.718	3	0.3	19	48.71
HVPGGGSVQIVYKPVDLSKVTFK-K19-155	s320f_Tau	-	monolink	317	n/a	-	2609.46	653.372	4	-0.8	3	48.54
KLDLSNVQSKCGSK-K10-155	s320f_Tau	-	monolink	290	n/a	-	1717.9	573.642	3	-1.9	1	46.88
DNIKHVPGGGSVQIVYKPVDLSK-K4-156	s320f_Tau	-	monolink	298	n/a	-	2605.41	869.478	3	0	8	46.81
HQPGGGKVQIINK-K7-156	s320f_Tau	-	monolink	274	n/a	-	1530.85	511.291	3	-1.3	4	46.45
LDLSNVQSKCGSK-K9-155	s320f_Tau	-	monolink	290	n/a	-	1589.81	530.943	3	-2.1	1	46.34
DNIKHVPGGGSVQIVYKPVDLSK-K4-155	s320f_Tau	-	monolink	298	n/a	-	2604.43	869.149	3	-1.8	11	46.2
HVPGGGSVQIVYKPVDLSK-K13-155	s320f_Tau	-	monolink	311	n/a	-	2134.18	712.401	3	-0.8	74	42.97
HVPGGGSVQIVYKPVDLSKVTFK-K13-K19	s320f_Tau	-	intralink	311	317	6	2592.43	865.152	3	0.3	97	42.87
HVPGGGSVQIVYKPVDLSK-K13-156	s320f_Tau	-	monolink	311	n/a	-	2135.16	712.729	3	0.1	132	42.82
HQPGGGKVQIINK-SKIGSTENLK-a7-b2	s320f_Tau	s320f_Tau	intra-protein xl	274	259	15	2588.43	518.693	5	-0.6	5	42.5
CGSLGNIHHKPGGGQVEVK-K10-155	s320f_Tau	-	monolink	331	n/a	-	2128.08	710.369	3	-1	10	41.91
IGSLDNITHVPGGGNKK-K16-156	s320f_Tau	-	monolink	369	n/a	-	1861.99	621.671	3	-0.5	138	41.87
IGSLDNITHVPGGGNKK-K17-156	s320f_Tau	-	monolink	370	n/a	-	1861.99	621.671	3	0.1	53	41.43
KIETHKLTFR-K6-156	s320f_Tau	-	monolink	375	n/a	-	1427.81	476.946	3	0.4	1	41.17
HQPGGGKVQIINK-KLDLSNVQSK-a7-b1	s320f_Tau	s320f_Tau	intra-protein xl	274	281	7	2643.47	529.702	5	-0.8	1	41.14
IGSLDNITHVPGGGNKK-K16-155	s320f_Tau	-	monolink	369	n/a	-	1861.01	621.343	3	-1.5	366	41.05
KLDLSNVQSKCGSK-K10-156	s320f_Tau	-	monolink	290	n/a	-	1718.89	573.97	3	-0.9	6	40.82
IGSTENLKHQPGGGK-KLDLSNVQSK-a8-b1	s320f_Tau	s320f_Tau	intra-protein xl	267	281	14	2790.48	931.169	3	-1.7	11	40.31
CGSLGNIHHKPGGGQVEVK-K10-156	s320f_Tau	-	monolink	331	n/a	-	2129.07	710.696	3	-1.5	26	40.28
VQSKIGSLDNITHVPGGGNKK-SEKLDFK-a4-b3	s320f_Tau	s320f_Tau	intra-protein xl	353	343	10	3151.69	1051.57	3	-0.7	2	40.2
IGSLDNITHVPGGGNKK-K17-155	s320f_Tau	-	monolink	370	n/a	-	1861.01	621.343	3	-1.3	110	39.99
VQSKIGSLDNITHVPGGGNKK-K4-156	s320f_Tau	-	monolink	353	n/a	-	2304.24	577.069	4	-0.1	18	39.99
VQIINKK-LDFKDR-a6-b4	s320f_Tau	s320f_Tau	intra-protein xl	280	347	67	1772.02	444.012	4	-1.6	2	39.94
IGSLDNITHVPGGGNKK-IETHKLTFR-a16-b5	s320f_Tau	s320f_Tau	intra-protein xl	369	375	6	2987.62	747.913	4	-0.1	1	39.87
LDLSNVQSKCGSK-VQIINKK-a9-b6	s320f_Tau	s320f_Tau	intra-protein xl	290	280	10	2414.32	604.587	4	-0.9	4	39.87
CGSLGNIHHKPGGGQVEVKSEK-K19-155	s320f_Tau	-	monolink	340	n/a	-	2472.25	619.071	4	-1.9	5	39.77
KLDLSNVQSK-LDFKDR-a1-b4	s320f_Tau	s320f_Tau	intra-protein xl	281	347	66	2061.11	516.285	4	-1.2	2	39.68
VQSKIGSLDNITHVPGGGNK-SEKLDFKDR-a4-b3	s320f_Tau	s320f_Tau	intra-protein xl	353	343	10	3294.72	550.127	6	-0.9	7	39.38
HQPGGGKVQIINKK-K7-155	s320f_Tau	-	monolink	274	n/a	-	1657.96	553.662	3	-2.1	1	39.23
VQSKIGSLDNITHVPGGGNK-K4-155	s320f_Tau	-	monolink	353	n/a	-	2175.16	726.063	3	-0.5	93	39.23
LDLSNVQSKCGSKDNIK-K13-156	s320f_Tau	-	monolink	294	n/a	-	2061.04	688.021	3	-0.9	2	39.17
HVPGGGSVQIVYKPVDLSKVTFK-K13-155	s320f_Tau	-	monolink	311	n/a	-	2609.46	653.372	4	-0.8	2	39.04
VTFKCGSLGNIHHKPGGGQVEVK-K4-156	s320f_Tau	-	monolink	321	n/a	-	2604.35	652.095	4	-0.1	41	38.69
CGSLGNIHHKPGGGQVEVKSEK-K19-156	s320f_Tau	-	monolink	340	n/a	-	2473.23	619.316	4	-2.1	10	38.47
DRVQSKIGSLDNITHVPGGGNK-K6-156	s320f_Tau	-	monolink	353	n/a	-	2447.27	612.826	4	-1.4	1	38.07
VTFKCGSLGNIHHKPGGGQVEVK-K4-155	s320f_Tau	-	monolink	321	n/a	-	2603.37	651.849	4	0.2	22	37.97
SEKLDFKDR-K3-155	s320f_Tau	-	monolink	343	n/a	-	1291.67	431.566	3	-3.4	9	37.95
CGSKDNIKHVPGGGSVQIVYKPVDLSK-K4-K8	s320f_Tau	-	intralink	294	298	4	3019.58	1007.53	3	0.6	3	37.91
IGSLDNITHVPGGGNKKIETHK-K16-K17	s320f_Tau	-	intralink	369	370	1	2452.31	614.084	4	-0.4	14	37.88
VQSKIGSLDNITHVPGGGNKK-K4-155	s320f_Tau	-	monolink	353	n/a	-	2303.26	576.823	4	-1.2	8	37.84
SKIGSTENLK-SEKLDFK-a2-b3	s320f_Tau	s320f_Tau	intra-protein xl	259	343	84	2079.11	694.044	3	-0.6	1	37.72
IGSTENLKHQPGGGK-K8-155	s320f_Tau	-	monolink	267	n/a	-	1676.88	559.968	3	-2.7	24	37.68
IGSTENLKHQPGGGK-KLDLSNVQSKCGSK-a8-b10	s320f_Tau	s320f_Tau	intra-protein xl	267	290	23	3222.66	1075.23	3	-0.6	2	37.57
[truncated: 445 more rows]

[truncated: 7 more sheets: Fig4g_SF4, Fig4g_SF5, Fig4h_SFIS1, Fig4h_SFIS2, Fig4h_SFIS3, Fig4h_SFIS4, Fig4h_SFIS5]
