# Supplementary material for: FTD-tau S320F mutation stabilizes local structure and allosterically promotes amyloid motif-dependent aggregation
Source: Research Square preprint supplement (doi:10.21203/rs.3.rs-1950269/v1), 2022-08-22
Supplement: Supplementary file 3 [file e01102b35e9761dbae92fbc2.xlsx]

## Sheet: fig1
Avg mCherry Intensity	S320F			WT			P301S
4777.67	2.35	1.3	1.38
12486.3	5.13	3.24	3.56
20634.3	16.3	7.83	10.4
28958.7	40.3	14.4	17.8
36675	56.2	29.3	37.3
3927				0.13	0.26	0.19
12487.7				0	0	0
20812.7				0	0	0
28961.3				0	1.3	0
37080.3				0	0	0
4925.33							0	0	0.077
12600							0	0	0
20689.3							0	0	0
28830.3							0	1.11	0.45
36685							0	0	0

## Sheet: supplementary_fig1
Avg mCherry Intensity	S320F			WT			P301S
4697	0.93	0.69	1.12
12574	2.3	2.04	2.53
20669	5.47	3.96	4.83
28829	7.04	10.4	11.4
36582.7	13.6	18	37.5
4808.67				0.14	0.082	0.13
12662.3				0.13	0.061	0.2
20865.3				0.17	0	0.18
28813.7				0.44	0	0
36422.7				2.86	1.05	0
4776							0	0.11	0.17
12653.7							0.062	0.19	0.12
20688.7							0.17	0.55	0.33
29011							0	0	1.38
36699.7							0	0	0

## Sheet: fig4
Avg mCherry Intensity	S320F			S320F/I328S			WT
11728	0.14	0.18	0.18
28129	0.6	0.68	1
46002.3	3.07	1.53	2.35
63862.7	5	5.96	6.81
11426.3				0	0.061	0
27903.3				0.057	0	0.11
45561				0.35	1.51	0.54
63721.7				2.92	3.33	1.96
9728.67							0	0.051	0.078
27707							0	0	0
45639.7							0	0	0
63878.7							0	0	0

## Sheet: supplementary_fig4
Avg mCherry Intensity	S320F			S320F/I328S			WT
10971.3	0.098	0.063	0.18
27584	0.53	0.59	0.54
45494.7	1.82	3.38	1.55
63827	2.97	10	4.82
11046.7				0.02	0	0.079
27719.7				0.066	0.072	0.4
45696.7				1.12	0.56	0.26
62756.3				0.89	1	1.22
8806.67							0.11	0.023	0.087
27072.3							0	0	0
45188							0	0	1.18
64658.3							0	0	0

## Sheet: fig5
Avg mCherry Intensity	S320F tauRD			S320I tauRD			S320I/I328V tauRD			WT tauRD			P301S tauRD
5408.33	3.04	2.86	2.83
10142.3	5.47	5.11	5.55
14990.3	13.4	10.6	11.3
19654.3	26.6	22.9	22.5
4827.33				14.4	21.5	15.9
10112				33.9	36.3	44.6
15176.3				46.9	50.8	55.3
19812.7				64.6	80.3	72.5
5020							16.6	20.9	23.6
10056.3							25	34.6	35
15101.7							38.7	48.5	46.4
19910							63.2	71.2	73.3
4877.33										0	0.00253	0
9667										0	0	0
14617										0	0	0
19351.7										0	0	0
4759.33													0.00406	0	0.014
9763.67													0	0.011	0.058
14703.3													0.06	0	0
19486.3													0	0	0

## Sheet: supplementary_fig5
Avg mCherry Intensity	S320F tauRD			S320V tauRD			WT tauRD			P301S tauRD
5408.33	3.04	2.86	2.83
10142.3	5.47	5.11	5.55
14990.3	13.4	10.6	11.3
19654.3	26.6	22.9	22.5
5042.67				21.7	27.2	18.5
10013.7				34.4	37.1	34.8
15146				36.7	46.1	47.4
19805.3				71.7	62.2	72.2
4877.33							0	0.00253	0
9667							0	0	0
14617							0	0	0
19351.7							0	0	0
4759.33										0.00406	0	0.014
9763.67										0	0.011	0.058
14703.3										0.06	0	0
19486.3										0	0	0
